# Supplementary material for: The interferon-rich skin environment regulates Langerhans cell ADAM17 to promote photosensitivity in lupus
Source: bioRxiv preprint, doi:10.1101/2021.08.18.456792, version 4 (2023-01-18)
Supplement: Table S4. DEGs in LPR vs control MRL non-lesional skin [file 456792_file08.xlsx]

## Sheet: All_Counts
gene_id	gene_type	gene_name	tag	seqnames	start	end	width	strand	a14_lpr_Rep1	a14_lpr_Rep2	a14_lpr_Rep3	a14_lpr_Rep4	a14_mrl_Rep1	a14_mrl_Rep2	a14_mrl_Rep3	a14_mrl_Rep4	a14_mrl_Rep5	a12_lpr_Rep1	a12_lpr_Rep2	a12_lpr_Rep3	a12_lpr_Rep4	a12_mrl_Rep1	a12_mrl_Rep2	a12_mrl_Rep3	a12_mrl_Rep4
ENSMUSG00000051951	protein_coding	Xkr4		chr1	3205901	3671498	465598	-	6	17	6	18	15	16	6	13	3	13	14	22	19	9	14	10	17
ENSMUSG00000104017	TEC	Gm37363		chr1	3375556	3377788	2233	-	0	0	0	0	1	0	0	0	0	0	0	0	0	0	0	0	0
ENSMUSG00000103201	TEC	Gm37329		chr1	3512451	3514507	2057	-	0	0	0	0	0	0	0	0	0	0	0	0	0	0	0	0	0
ENSMUSG00000103147	processed_pseudogene	Gm7341	pseudo_consens	chr1	3531795	3532720	926	+	0	0	0	0	0	0	0	0	0	0	0	0	0	0	0	0	3
ENSMUSG00000102331	lncRNA	Gm19938		chr1	3647309	3658904	11596	-	0	3	2	2	2	1	0	0	5	3	1	2	0	1	0	2	0
ENSMUSG00000025900	protein_coding	Rp1	overlapping_locus	chr1	3999557	4409241	409685	-	32	62	40	67	74	56	63	51	69	36	59	41	65	53	27	88	48
ENSMUSG00000102948	processed_pseudogene	Gm6101	overlapping_locus	chr1	4256234	4260519	4286	-	0	0	0	0	0	0	1	1	0	0	0	0	0	0	1	0	1
ENSMUSG00000025902	protein_coding	Sox17		chr1	4490931	4497354	6424	-	98	167	86	166	107	124	157	120	124	133	148	171	118	127	137	118	127
ENSMUSG00000104238	lncRNA	Gm37587		chr1	4496551	4499558	3008	+	1	0	0	0	0	1	0	1	0	0	0	0	0	0	0	1	1
ENSMUSG00000102269	processed_pseudogene	Gm7357	pseudo_consens	chr1	4522905	4526737	3833	+	0	1	0	3	2	0	2	0	1	3	1	2	1	1	2	3	2
ENSMUSG00000104328	lncRNA	Gm37323		chr1	4583129	4586252	3124	-	0	0	0	0	0	0	0	0	0	0	0	0	1	0	0	0	0
ENSMUSG00000102735	processed_pseudogene	Gm7369	pseudo_consens	chr1	4610471	4611406	936	+	0	0	1	1	1	0	0	0	1	0	0	0	0	0	0	0	1
ENSMUSG00000098104	processed_pseudogene	Gm6085	pseudo_consens	chr1	4687934	4689403	1470	-	26	46	35	47	52	46	54	41	35	49	68	42	44	31	39	33	48
ENSMUSG00000102175	processed_pseudogene	Gm6119	pseudo_consens	chr1	4692219	4693424	1206	-	0	0	0	2	1	0	0	0	0	0	0	0	0	0	3	0	0
ENSMUSG00000103922	processed_pseudogene	Gm6123	pseudo_consens	chr1	4771131	4772199	1069	+	4	4	5	5	5	2	5	5	4	7	7	4	5	8	5	7	5
ENSMUSG00000033845	protein_coding	Mrpl15		chr1	4773206	4785739	12534	-	848	663	889	851	749	792	806	846	955	827	789	655	702	815	802	783	720
ENSMUSG00000102275	TEC	Gm37144		chr1	4778063	4779212	1150	-	10	10	10	13	11	8	8	10	5	8	13	12	10	14	9	16	11
ENSMUSG00000025903	protein_coding	Lypla1	overlapping_locus	chr1	4807788	4848410	40623	+	1289	1215	1526	1548	1121	1236	1484	1445	1679	1169	1193	1113	1320	1321	1399	1287	1069
ENSMUSG00000033813	protein_coding	Tcea1	overlapping_locus	chr1	4857814	4897909	40096	+	176	155	188	198	151	182	194	156	168	164	169	135	162	146	146	150	142
ENSMUSG00000062588	processed_pseudogene	Gm6104		chr1	4880049	4880651	603	-	1	3	2	4	0	1	2	1	3	0	0	1	0	1	2	0	1
ENSMUSG00000103280	TEC	Gm37277		chr1	4905751	4906861	1111	-	7	13	9	10	11	6	14	7	7	4	3	10	9	6	7	5	3
ENSMUSG00000002459	protein_coding	Rgs20	overlapping_locus	chr1	4909576	5070285	160710	-	100	117	198	116	100	97	84	97	116	94	112	89	136	86	140	99	103
ENSMUSG00000091305	processed_pseudogene	Gm17100	overlapping_locus	chr1	4927028	4927299	272	-	0	0	0	0	1	0	0	0	0	0	0	0	0	0	0	0	0
ENSMUSG00000102653	TEC	Gm37079		chr1	4938576	4940710	2135	-	0	0	0	1	0	0	0	0	0	0	0	0	0	1	0	0	1
ENSMUSG00000085623	lncRNA	Gm16041		chr1	4970857	4976820	5964	+	1	0	0	0	0	1	0	1	0	2	2	0	0	0	0	0	0
ENSMUSG00000033793	protein_coding	Atp6v1h		chr1	5070018	5162529	92512	+	1851	1832	2364	1987	2019	1869	2034	1821	2010	1876	1938	1700	1898	1899	2009	1896	1751
ENSMUSG00000104046	TEC	Gm37567		chr1	5307739	5310017	2279	+	0	0	1	2	1	0	0	0	0	1	1	0	1	0	0	2	0
ENSMUSG00000102907	TEC	Gm38264		chr1	5403547	5405578	2032	+	0	0	0	0	0	0	0	0	0	0	0	0	1	0	0	0	0
ENSMUSG00000025905	protein_coding	Oprk1		chr1	5588466	5606131	17666	+	1	0	0	0	0	0	0	0	0	0	0	0	0	1	0	0	0
ENSMUSG00000103936	processed_pseudogene	Gm36965	pseudo_consens	chr1	5617837	5618230	394	-	0	0	0	0	0	0	0	0	0	0	0	1	0	0	0	0	0
ENSMUSG00000033774	protein_coding	Npbwr1		chr1	5913707	5917398	3692	-	147	169	237	206	115	139	144	212	173	90	138	97	125	123	167	147	129
ENSMUSG00000025907	protein_coding	Rb1cc1		chr1	6206197	6276648	70452	+	1511	1957	2325	2354	1566	1467	1786	1611	1790	1753	1769	1636	2071	1489	1875	1766	1511
ENSMUSG00000090031	lncRNA	4732440D04Rik		chr1	6209866	6215293	5428	-	89	92	114	186	75	106	106	110	136	97	98	126	143	149	110	111	92
ENSMUSG00000087247	protein_coding	Alkal1	overlapping_locus	chr1	6359218	6394731	35514	+	0	0	0	0	0	0	0	0	0	0	2	0	0	0	0	0	0
ENSMUSG00000103355	processed_pseudogene	Gm2147	overlapping_locus	chr1	6380394	6381032	639	+	1	0	1	1	0	3	4	0	0	1	0	0	2	0	0	0	1
ENSMUSG00000102706	processed_pseudogene	Gm7417	pseudo_consens	chr1	6382634	6383106	473	-	0	0	0	1	0	0	0	0	0	0	0	0	0	1	1	0	0
ENSMUSG00000103845	processed_pseudogene	Gm19026	pseudo_consens	chr1	6429655	6441296	11642	-	2	1	0	0	0	0	2	2	0	0	1	0	1	1	0	0	1
ENSMUSG00000033740	protein_coding	St18		chr1	6487231	6860940	373710	+	3	4	1	3	2	0	1	0	4	1	2	4	2	0	2	0	4
ENSMUSG00000103329	TEC	Gm42492		chr1	6861237	6864151	2915	-	0	1	0	0	0	0	0	0	0	0	0	0	0	0	0	0	0
ENSMUSG00000104385	processed_pseudogene	Gm7449	pseudo_consens	chr1	6910560	6911222	663	+	0	0	0	1	3	1	0	1	1	1	0	0	0	0	1	1	1
ENSMUSG00000102135	processed_pseudogene	Gm37108	pseudo_consens	chr1	6916559	6923588	7030	+	6	5	3	5	4	9	6	4	2	7	5	4	2	7	6	6	4
ENSMUSG00000102534	processed_pseudogene	Gm37225		chr1	6998217	6998541	325	+	0	0	0	0	0	1	0	0	2	0	0	0	1	1	0	0	0
ENSMUSG00000103629	processed_pseudogene	Gm5694	pseudo_consens	chr1	7035915	7037217	1303	+	1	0	0	0	0	0	0	0	0	0	0	0	3	0	0	0	0
ENSMUSG00000051285	protein_coding	Pcmtd1	overlapping_locus	chr1	7088920	7173628	84709	+	1240	1582	1718	1885	1456	1421	1600	1319	1481	1554	1693	1718	1872	1429	1759	1683	1529
ENSMUSG00000098201	processed_pseudogene	Gm26983	pseudo_consens	chr1	7136199	7136586	388	-	0	0	0	1	0	0	0	1	0	0	0	1	1	0	0	0	0
ENSMUSG00000103509	TEC	Gm38372		chr1	7148110	7152137	4028	+	43	43	66	64	28	32	36	21	50	32	24	58	80	44	32	61	46
ENSMUSG00000048538	processed_pseudogene	Gm9826		chr1	7177739	7179037	1299	+	0	0	0	1	0	2	0	0	1	1	1	0	0	0	0	0	0
ENSMUSG00000103709	processed_pseudogene	Nras-ps2	pseudo_consens	chr1	7189742	7189919	178	-	1	0	0	0	0	0	0	0	0	0	0	0	0	0	0	0	0
ENSMUSG00000097797	lncRNA	Gm26901		chr1	7349406	7397869	48464	-	7	5	8	3	11	5	6	16	4	6	7	9	5	10	21	11	3
ENSMUSG00000103067	lncRNA	Gm30414		chr1	7497968	7518149	20182	+	0	0	0	1	0	1	0	0	0	0	3	0	0	1	0	0	0
ENSMUSG00000104226	processed_pseudogene	Gm7470	pseudo_consens	chr1	7597379	7599473	2095	+	0	0	0	0	0	1	0	0	0	0	0	0	0	0	0	0	0
ENSMUSG00000103903	processed_pseudogene	Rps2-ps2	pseudo_consens	chr1	7664081	7664961	881	+	0	1	1	1	2	0	1	2	2	1	2	0	4	2	2	1	1
ENSMUSG00000025909	protein_coding	Sntg1	overlapping_locus	chr1	8361475	9299878	938404	-	2	1	0	2	1	2	2	2	0	0	1	0	0	0	2	2	0
ENSMUSG00000086235	processed_pseudogene	Gm16284	overlapping_locus	chr1	8468426	8468825	400	-	0	1	0	1	0	0	1	0	1	1	0	0	0	0	0	1	1
ENSMUSG00000093970	miRNA	Gm23358		chr1	8588615	8588724	110	-	0	0	0	0	1	0	0	0	0	0	0	0	0	0	0	0	0
ENSMUSG00000084353	processed_pseudogene	Gm15452	overlapping_locus	chr1	8791923	8792162	240	-	0	0	0	0	0	0	1	0	0	1	2	0	1	1	0	0	0
ENSMUSG00000103933	processed_pseudogene	Gm36964	pseudo_consens	chr1	8815842	8816039	198	+	15	11	14	11	8	11	12	12	12	7	9	13	8	9	9	11	13
ENSMUSG00000076135	miRNA	Gm24276		chr1	8816138	8816247	110	+	0	1	0	0	1	0	0	1	1	1	0	1	1	1	0	1	0
ENSMUSG00000104504	processed_pseudogene	Gm7445	pseudo_consens	chr1	8856763	8857102	340	+	0	0	0	0	0	0	0	0	0	0	0	0	0	0	0	0	0
ENSMUSG00000066693	processed_pseudogene	Gm7493	overlapping_locus	chr1	8962996	8963621	626	-	0	0	1	0	0	0	0	0	0	0	0	0	0	0	0	0	0
ENSMUSG00000103819	processed_pseudogene	Gm38008	overlapping_locus	chr1	9258617	9259134	518	-	0	0	0	0	0	0	0	0	0	0	0	0	0	0	0	0	0
ENSMUSG00000101571	processed_pseudogene	Gm6187	pseudo_consens	chr1	9396773	9398687	1915	-	0	0	0	0	0	0	0	0	2	1	0	0	1	2	0	1	1
ENSMUSG00000102272	processed_pseudogene	Gm7512	pseudo_consens	chr1	9450579	9451748	1170	+	0	0	0	0	0	0	0	0	0	0	0	0	0	0	0	1	0
ENSMUSG00000103411	processed_pseudogene	Gm18300	pseudo_consens	chr1	9499338	9501522	2185	-	0	0	0	0	0	0	0	1	0	0	0	0	0	0	0	0	0
ENSMUSG00000061024	protein_coding	Rrs1		chr1	9545408	9547455	2048	+	472	546	733	464	505	537	609	497	488	572	426	489	545	453	562	575	537
ENSMUSG00000025911	protein_coding	Adhfe1	overlapping_locus	chr1	9547948	9580673	32726	+	81	122	90	163	135	128	110	128	120	138	115	128	151	113	140	138	110
ENSMUSG00000079671	lncRNA	2610203C22Rik		chr1	9560832	9631175	70344	-	52	45	27	55	34	21	24	34	43	29	27	27	58	36	47	51	40
ENSMUSG00000067879	protein_coding	Vxn		chr1	9601199	9627143	25945	+	10	9	2	9	4	1	0	7	4	3	11	8	10	4	1	3	7
ENSMUSG00000025912	protein_coding	Mybl1		chr1	9667415	9700209	32795	-	89	113	109	183	109	112	111	126	112	60	83	76	99	110	99	103	71
ENSMUSG00000045210	protein_coding	Vcpip1		chr1	9718622	9748382	29761	-	562	790	924	867	699	624	749	597	615	617	655	699	870	621	717	605	633
ENSMUSG00000097893	lncRNA	1700034P13Rik		chr1	9747648	9791924	44277	+	1	3	1	4	1	4	3	2	3	0	9	5	0	2	2	1	1
ENSMUSG00000025915	protein_coding	Sgk3		chr1	9798107	9900845	102739	+	974	990	1185	1295	849	842	965	846	1078	1034	1098	1042	1121	1026	1065	965	908
ENSMUSG00000046334	processed_pseudogene	Gm6195	pseudo_consens	chr1	9802197	9802553	357	-	0	2	0	1	0	2	0	0	1	0	1	0	0	1	0	1	1
ENSMUSG00000088916	snRNA	Gm22607		chr1	9834498	9834602	105	-	0	1	0	1	0	1	0	0	0	0	0	0	0	0	0	0	0
ENSMUSG00000046101	protein_coding	Mcmdc2		chr1	9908638	9942085	33448	+	0	0	0	0	0	0	0	0	0	0	0	0	1	0	0	1	0
ENSMUSG00000098234	lncRNA	Snhg6	overlapping_locus	chr1	9941959	9944118	2160	-	323	206	316	317	286	286	309	274	383	237	265	224	211	281	277	306	243
ENSMUSG00000093178	snoRNA	Snord87		chr1	9942463	9942549	87	-	2	0	3	5	2	2	9	1	6	6	3	3	6	8	3	1	9
ENSMUSG00000099032	protein_coding	Tcf24		chr1	9960163	9967932	7770	-	67	71	109	87	96	86	81	90	115	71	71	81	82	116	99	97	117
ENSMUSG00000104025	TEC	E330040D14Rik		chr1	9967314	9968687	1374	+	2	2	8	4	4	4	3	6	4	7	4	3	3	8	9	8	13
ENSMUSG00000025916	protein_coding	Ppp1r42		chr1	9968624	10009136	40513	-	2	6	4	7	1	8	1	2	7	2	5	4	5	7	7	1	6
ENSMUSG00000095780	snRNA	Gm24674		chr1	10009814	10009917	104	-	0	0	0	0	0	0	0	0	0	0	2	0	1	0	0	0	0
ENSMUSG00000025917	protein_coding	Cops5		chr1	10024601	10038168	13568	-	2383	2247	2684	2658	2487	2265	2471	2400	2793	2237	2333	1947	2187	2342	2244	2316	2110
ENSMUSG00000056763	protein_coding	Cspp1		chr1	10037987	10136768	98782	+	342	356	334	507	351	335	395	318	345	271	234	345	393	373	388	437	372
ENSMUSG00000102356	TEC	1700047N06Rik	overlapping_locus	chr1	10057025	10057944	920	-	0	0	0	0	0	0	0	0	0	0	0	0	0	0	0	0	0
ENSMUSG00000067851	protein_coding	Arfgef1	overlapping_locus	chr1	10137571	10232670	95100	-	2069	2401	2965	2762	2421	2089	2297	2082	2365	2362	2204	2349	2550	2052	2375	2364	2236
ENSMUSG00000088153	misc_RNA	Gm26348		chr1	10166539	10166778	240	+	0	0	0	0	0	0	1	0	0	0	1	1	0	0	0	0	1
ENSMUSG00000102556	TEC	Gm37569	overlapping_locus	chr1	10197081	10198802	1722	-	1	0	0	0	0	0	0	0	0	0	0	0	0	1	0	0	0
ENSMUSG00000042501	protein_coding	Cpa6	overlapping_locus	chr1	10324720	10719945	395226	-	26	33	29	36	31	23	34	30	32	50	44	47	34	25	30	27	43
ENSMUSG00000103810	TEC	Gm38005	overlapping_locus	chr1	10449245	10451989	2745	-	1	0	0	0	1	0	0	0	0	0	1	0	0	0	0	0	0
ENSMUSG00000083422	processed_pseudogene	Gm15604	overlapping_locus	chr1	10554098	10555553	1456	-	3	2	1	4	1	0	2	0	1	5	1	2	3	2	4	1	0
ENSMUSG00000081417	processed_pseudogene	Gm15603	pseudo_consens	chr1	10695123	10695614	492	+	0	2	3	1	0	1	1	0	0	0	0	0	1	2	0	0	2
ENSMUSG00000103448	TEC	Gm37133		chr1	10782456	10784377	1922	-	0	0	2	3	0	0	0	0	0	1	0	0	0	1	0	0	1
ENSMUSG00000100212	processed_pseudogene	Gm5522	pseudo_consens	chr1	10805281	10806522	1242	+	0	0	0	0	0	1	0	0	0	0	0	0	0	1	0	0	0
ENSMUSG00000100648	processed_pseudogene	Gm28659	pseudo_consens	chr1	10868688	10869446	759	+	11	8	17	8	7	6	10	5	13	8	11	5	7	11	11	2	5
ENSMUSG00000048960	protein_coding	Prex2		chr1	10993465	11303681	310217	+	266	456	353	485	381	392	461	341	403	424	404	398	540	357	464	420	491
ENSMUSG00000101827	processed_pseudogene	Gm28686	pseudo_consens	chr1	11223566	11224174	609	-	2	3	5	3	5	6	3	5	4	3	1	2	6	3	5	1	2
ENSMUSG00000057715	protein_coding	A830018L16Rik	overlapping_locus	chr1	11414105	11975901	561797	+	3	4	1	4	3	7	1	2	5	1	3	6	4	12	9	6	3
ENSMUSG00000103825	TEC	Gm38178	overlapping_locus	chr1	11416918	11419388	2471	+	0	0	0	0	0	0	0	1	0	0	0	0	0	0	0	0	0
ENSMUSG00000101610	processed_pseudogene	Gm7560	pseudo_consens	chr1	12120960	12121832	873	+	0	2	0	1	0	3	0	3	2	0	0	1	0	3	1	1	1
ENSMUSG00000093864	snRNA	Gm22633		chr1	12374936	12375042	107	+	0	0	0	1	0	0	0	0	0	0	0	0	0	0	0	0	0
ENSMUSG00000097628	processed_pseudogene	Gm2383	pseudo_consens	chr1	12565577	12566383	807	+	1	5	6	1	2	3	2	1	6	3	1	3	3	3	2	5	6
ENSMUSG00000098163	processed_pseudogene	Gm6216	pseudo_consens	chr1	12655867	12656553	687	+	2	1	0	1	0	0	0	0	0	0	0	0	1	0	0	0	0
ENSMUSG00000016918	protein_coding	Sulf1		chr1	12692277	12861192	168916	+	98	172	172	216	176	126	198	140	184	215	155	209	262	182	221	176	171
ENSMUSG00000025938	protein_coding	Slco5a1		chr1	12866549	12992650	126102	-	111	207	147	243	198	156	150	138	159	96	155	158	208	143	90	247	98
ENSMUSG00000042414	protein_coding	Prdm14		chr1	13113457	13127163	13707	-	0	0	0	1	0	0	0	0	0	0	0	0	0	0	0	0	0
ENSMUSG00000005886	protein_coding	Ncoa2	overlapping_locus	chr1	13139105	13374083	234979	-	1171	1650	2058	1888	1440	1267	1490	1252	1309	1234	1433	1544	1975	1242	1703	1575	1421
ENSMUSG00000103506	TEC	Gm38376	overlapping_locus	chr1	13177462	13179714	2253	-	0	1	5	2	1	1	2	2	2	0	0	3	1	0	0	1	1
ENSMUSG00000103495	TEC	Gm37409	overlapping_locus	chr1	13234809	13236434	1626	-	0	0	0	0	1	0	0	0	0	0	0	0	0	0	0	0	0
ENSMUSG00000099183	miRNA	Gm27881		chr1	13262198	13262279	82	+	0	0	0	0	0	0	0	0	0	0	0	0	0	0	0	0	1
ENSMUSG00000104170	TEC	Gm37702	overlapping_locus	chr1	13297036	13298907	1872	-	0	0	0	0	1	0	0	0	0	0	1	0	1	0	0	0	0
ENSMUSG00000103085	TEC	Gm38120	overlapping_locus	chr1	13343563	13348204	4642	-	0	1	1	4	1	1	2	0	0	0	0	3	2	3	0	2	2
ENSMUSG00000102664	TEC	Gm38380	overlapping_locus	chr1	13354483	13356730	2248	-	0	0	0	0	0	0	3	1	0	0	1	0	4	2	1	2	0
ENSMUSG00000101476	lncRNA	Gm29570		chr1	13376070	13388413	12344	+	0	0	0	2	0	0	0	2	0	1	1	0	0	0	2	0	1
ENSMUSG00000101171	processed_pseudogene	Gm7593	pseudo_consens	chr1	13407012	13407655	644	-	2	1	1	4	0	2	1	1	1	1	0	0	2	1	2	2	0
ENSMUSG00000025935	protein_coding	Tram1		chr1	13564698	13589910	25213	-	2353	2354	3008	2639	2361	2044	2315	2274	2317	1960	2086	1980	2253	2292	2611	2126	2011
ENSMUSG00000025937	protein_coding	Lactb2	overlapping_locus	chr1	13623330	13660546	37217	-	236	256	407	310	275	276	284	307	389	325	300	286	363	431	334	357	329
ENSMUSG00000102982	TEC	Gm38319	overlapping_locus	chr1	13641483	13642748	1266	-	2	6	2	8	2	2	2	3	3	5	1	4	1	4	3	5	3
ENSMUSG00000067813	protein_coding	Xkr9		chr1	13668771	13701723	32953	+	12	13	10	8	13	12	16	12	9	6	12	12	2	9	7	11	9
ENSMUSG00000097711	processed_pseudogene	Gm5523	pseudo_consens	chr1	13785883	13786879	997	-	1	3	4	1	3	0	1	3	5	6	1	2	6	1	2	1	2
ENSMUSG00000025932	protein_coding	Eya1	overlapping_locus	chr1	14168954	14310235	141282	-	38	80	54	114	65	69	82	85	92	58	72	78	92	65	43	85	61
ENSMUSG00000054493	lncRNA	Gm9947		chr1	14752937	14776931	23995	+	0	3	0	1	0	1	2	0	0	0	0	1	0	1	0	1	1
ENSMUSG00000025930	protein_coding	Msc		chr1	14753346	14755992	2647	-	4	8	2	7	7	1	4	7	9	6	4	7	6	4	4	7	4
ENSMUSG00000103492	TEC	Gm37412		chr1	14788645	14792965	4321	+	0	1	0	1	0	2	0	1	0	0	1	2	0	1	0	0	0
ENSMUSG00000081201	processed_pseudogene	Smt3h2-ps4		chr1	14839869	14840156	288	-	0	0	0	0	0	0	0	0	0	1	0	0	0	0	0	0	0
ENSMUSG00000082193	processed_pseudogene	Rpl5-ps1		chr1	14865072	14865965	894	+	4	1	5	5	8	4	5	2	7	8	2	2	2	2	4	1	4
ENSMUSG00000073737	processed_pseudogene	Gm10566	pseudo_consens	chr1	15268802	15269797	996	-	1	0	0	0	0	0	0	1	1	0	0	0	0	0	0	1	0
ENSMUSG00000092083	protein_coding	Kcnb2	overlapping_locus	chr1	15287254	15723750	436497	+	0	0	0	1	2	1	0	0	0	2	0	1	0	1	1	0	0
ENSMUSG00000101652	processed_pseudogene	Gm6060		chr1	15760122	15760668	547	-	0	0	1	2	3	0	1	0	0	1	0	0	3	1	0	1	0
ENSMUSG00000100814	processed_pseudogene	Gm28669		chr1	15760761	15760860	100	+	0	0	0	0	0	0	0	0	1	0	0	0	0	0	0	0	2
ENSMUSG00000025925	protein_coding	Terf1		chr1	15805646	15844052	38407	+	258	298	248	325	235	211	234	219	250	257	248	240	248	226	241	218	210
ENSMUSG00000104379	TEC	Gm37509		chr1	15853331	15856499	3169	+	3	4	4	7	7	2	0	3	5	5	2	4	6	2	4	5	4
ENSMUSG00000032719	protein_coding	Sbspon		chr1	15853862	15892722	38861	-	14	30	10	21	19	23	19	16	30	19	10	10	24	21	30	28	25
ENSMUSG00000100652	processed_pseudogene	Gm7634	pseudo_consens	chr1	16053335	16053887	553	+	6	6	4	7	3	3	6	4	8	4	4	0	5	4	5	3	3
ENSMUSG00000067795	protein_coding	4930444P10Rik		chr1	16065979	16093325	27347	-	1	1	4	1	1	0	0	0	8	2	2	2	3	3	2	0	0
ENSMUSG00000043716	protein_coding	Rpl7		chr1	16101295	16104662	3368	-	6660	5937	6985	6315	6380	6604	7101	6934	8747	6860	7039	5683	5885	6837	7410	6726	5814
ENSMUSG00000025921	protein_coding	Rdh10		chr1	16105774	16133734	27961	+	586	634	759	684	699	621	729	540	677	605	634	554	640	592	707	595	544
ENSMUSG00000104165	TEC	Gm38249		chr1	16208197	16210517	2321	-	0	0	0	0	0	0	0	0	0	0	0	1	0	0	0	0	1
ENSMUSG00000100868	lncRNA	Gm28095		chr1	16228506	16244062	15557	+	0	0	0	0	0	0	0	0	1	1	0	0	1	0	0	0	0
ENSMUSG00000025920	protein_coding	Stau2		chr1	16228674	16520112	291439	-	663	860	812	982	909	693	773	796	835	816	788	698	942	663	747	810	654
ENSMUSG00000089982	lncRNA	Gm7568		chr1	16253592	16267921	14330	+	0	1	0	0	0	0	0	0	0	0	0	0	0	0	0	1	0
ENSMUSG00000025939	protein_coding	Ube2w		chr1	16540790	16619489	78700	-	530	556	592	672	552	500	569	461	659	577	550	524	564	574	667	520	535
ENSMUSG00000102457	TEC	Gm38342		chr1	16618560	16621539	2980	+	2	2	4	3	3	1	2	5	1	5	5	4	3	3	2	6	6
ENSMUSG00000079658	protein_coding	Eloc		chr1	16641725	16657042	15318	-	1419	1155	1476	1483	1264	1317	1386	1354	1585	1327	1390	1153	1163	1465	1443	1304	1166
ENSMUSG00000097744	lncRNA	D030040B21Rik		chr1	16657552	16662278	4727	+	0	0	0	0	0	0	0	0	0	0	0	0	0	0	0	0	0
ENSMUSG00000100959	processed_pseudogene	Gm7654	pseudo_consens	chr1	16662980	16663662	683	-	0	1	0	0	0	0	0	0	2	0	0	1	0	0	0	0	0
ENSMUSG00000025940	protein_coding	Tmem70		chr1	16665207	16678275	13069	+	503	478	593	545	566	611	605	589	722	617	565	472	531	582	612	606	503
ENSMUSG00000025779	protein_coding	Ly96		chr1	16688051	16709611	21561	+	57	63	73	77	58	51	49	51	45	71	63	56	52	58	62	57	39
ENSMUSG00000091020	processed_pseudogene	Gm5828	pseudo_consens	chr1	16768279	16770138	1860	-	19	18	33	17	19	21	26	15	13	17	12	12	18	10	16	17	26
ENSMUSG00000042686	protein_coding	Jph1		chr1	16964560	17097889	133330	-	324	482	387	574	511	543	516	582	543	394	373	379	487	375	282	559	364
ENSMUSG00000100110	lncRNA	Gm28783		chr1	17124747	17128956	4210	+	0	0	0	0	0	0	0	0	1	0	0	0	0	2	0	0	0
ENSMUSG00000025777	protein_coding	Gdap1		chr1	17145362	17164271	18910	+	19	16	6	19	14	11	14	10	26	15	22	12	11	12	12	21	6
ENSMUSG00000100398	processed_pseudogene	Gm5251	pseudo_consens	chr1	17394958	17395429	472	+	0	0	0	0	0	1	0	1	0	0	0	0	1	0	0	0	0
ENSMUSG00000101589	processed_pseudogene	Rbm6-ps1		chr1	17397412	17400281	2870	-	0	2	5	7	9	1	6	3	3	4	1	6	5	5	6	3	2
ENSMUSG00000102048	processed_pseudogene	Gm6075	pseudo_consens	chr1	17429043	17429528	486	-	0	1	2	1	0	1	0	2	1	1	0	2	2	2	0	2	1
ENSMUSG00000067780	protein_coding	Pi15		chr1	17601901	17630939	29039	+	53	116	89	137	140	146	153	96	96	75	78	86	128	87	118	98	169
ENSMUSG00000100053	lncRNA	Gm28154		chr1	17615084	17641081	25998	-	3	9	5	4	4	7	3	8	8	2	8	4	5	1	5	3	3
ENSMUSG00000085125	lncRNA	Gm16070		chr1	17676027	17727646	51620	-	8	8	7	13	13	8	10	7	4	13	13	11	13	15	15	21	13
ENSMUSG00000025776	protein_coding	Crispld1		chr1	17727045	17766344	39300	+	292	400	344	397	264	309	303	329	474	462	526	431	419	440	597	416	453
ENSMUSG00000099895	lncRNA	Gm28153		chr1	17741915	17805417	63503	-	0	0	0	2	0	1	1	1	0	0	3	1	0	0	0	0	0
ENSMUSG00000100554	processed_pseudogene	Gm7690	pseudo_consens	chr1	17947041	17948439	1399	+	0	0	1	0	0	0	0	1	1	1	0	0	1	0	0	1	1
ENSMUSG00000099591	processed_pseudogene	Gm17969	pseudo_consens	chr1	17993813	17997483	3671	+	0	0	0	2	0	0	0	0	0	0	0	2	0	0	0	0	0
ENSMUSG00000109887	lncRNA	Gm28756	overlapping_locus	chr1	17994462	18059056	64595	-	0	0	0	0	0	0	0	0	1	0	0	0	0	0	0	0	0
ENSMUSG00000067773	protein_coding	Defb41	overlapping_locus	chr1	18250980	18265138	14159	-	0	1	1	0	0	0	0	0	0	0	0	0	0	0	0	0	0
ENSMUSG00000101685	processed_pseudogene	Gm17837	overlapping_locus	chr1	18262395	18263379	985	-	1	1	3	1	1	1	0	2	1	0	2	0	3	1	3	4	3
ENSMUSG00000101306	processed_pseudogene	Gm5252	pseudo_consens	chr1	18708428	18709336	909	+	0	0	0	0	0	0	0	0	1	0	0	0	0	0	0	0	0
ENSMUSG00000100720	processed_pseudogene	Gm10075	pseudo_consens	chr1	19153422	19153966	545	-	1	2	1	1	0	0	0	1	3	2	0	5	1	3	2	0	5
ENSMUSG00000025927	protein_coding	Tfap2b		chr1	19208914	19238576	29663	+	1517	1997	2040	2309	1654	1589	2049	1774	1703	1815	1705	2232	2232	1635	2049	1793	1732
ENSMUSG00000100538	lncRNA	Gm28340		chr1	19242725	19243769	1045	+	1	0	0	0	0	0	0	0	0	0	0	0	0	0	0	0	0
ENSMUSG00000101117	processed_pseudogene	Gm28341	pseudo_consens	chr1	19320226	19320697	472	-	0	0	0	0	0	0	0	1	0	0	0	0	0	0	0	1	0
ENSMUSG00000100204	processed_pseudogene	Gm4849	pseudo_consens	chr1	19330939	19333184	2246	+	1	3	3	1	1	0	0	1	1	1	1	0	2	0	1	1	0
ENSMUSG00000043760	protein_coding	Pkhd1	overlapping_locus	chr1	20057779	20618064	560286	-	0	2	2	2	0	0	1	0	1	0	1	1	1	1	0	0	0
ENSMUSG00000090142	processed_pseudogene	Gm15795	overlapping_locus	chr1	20444258	20444810	553	-	1	2	1	1	0	3	2	3	3	1	2	3	0	0	1	2	3
ENSMUSG00000099906	lncRNA	Gm28653	ncRNA_host	chr1	20669882	20684298	14417	+	19	17	17	39	21	18	21	12	18	15	36	17	41	25	5	22	20
ENSMUSG00000025929	protein_coding	Il17a		chr1	20730905	20734496	3592	+	5	0	0	0	0	0	0	0	0	0	0	0	0	0	1	0	0
ENSMUSG00000041872	protein_coding	Il17f		chr1	20777146	20790617	13472	-	7	6	1	2	2	1	6	2	0	0	2	0	2	2	0	0	2
ENSMUSG00000041859	protein_coding	Mcm3		chr1	20802968	20820312	17345	-	655	762	1216	793	652	536	610	597	578	489	502	480	609	656	686	669	606
ENSMUSG00000102121	lncRNA	Gm28065		chr1	20836661	20839689	3029	+	0	0	0	0	0	0	0	0	1	0	2	2	0	1	0	3	0
ENSMUSG00000097934	lncRNA	6720483E21Rik		chr1	20888650	20890473	1824	-	0	0	0	0	0	0	2	0	1	0	0	0	0	0	0	0	0
ENSMUSG00000025931	protein_coding	Paqr8		chr1	20890606	20939650	49045	+	120	240	227	199	155	135	153	170	167	174	249	205	250	161	247	200	180
ENSMUSG00000077314	snoRNA	Gm24171		chr1	20915410	20915540	131	-	0	0	0	0	0	0	0	1	0	0	0	0	0	0	0	0	0
ENSMUSG00000100929	processed_pseudogene	Gm28064		chr1	20945711	20946914	1204	+	0	0	0	0	0	0	0	0	1	1	0	1	0	0	2	0	0
ENSMUSG00000041809	protein_coding	Efhc1		chr1	20951626	20990841	39216	+	25	13	16	38	16	16	19	18	21	13	20	35	26	24	21	20	17
ENSMUSG00000041779	protein_coding	Tram2		chr1	20996299	21079229	82931	-	209	311	294	353	227	217	267	198	201	217	216	216	330	198	251	218	215
ENSMUSG00000099971	lncRNA	Gm28287		chr1	21080114	21081748	1635	+	0	0	0	0	0	0	0	0	0	0	0	0	0	0	0	0	0
ENSMUSG00000100819	unprocessed_pseudogene	Gm2693		chr1	21178988	21187427	8440	+	5	7	1	4	7	3	3	3	1	5	1	4	3	4	3	5	0
ENSMUSG00000025933	protein_coding	Tmem14a		chr1	21218575	21230167	11593	+	49	41	36	59	44	57	44	48	55	41	56	65	48	55	52	50	48
ENSMUSG00000102633	TEC	Gm38224		chr1	21234722	21236821	2100	+	2	1	1	3	0	0	0	0	0	1	1	0	5	1	3	0	2
ENSMUSG00000025934	protein_coding	Gsta3		chr1	21240589	21265661	25073	+	465	463	366	638	652	594	651	610	761	583	460	529	514	723	542	537	694
ENSMUSG00000099343	lncRNA	Gm28836		chr1	21250359	21271593	21235	-	1	1	1	1	1	2	1	0	0	1	1	2	0	1	0	0	0
ENSMUSG00000096375	unprocessed_pseudogene	Gm7094		chr1	21272403	21272906	504	+	0	0	0	0	0	0	0	0	0	1	1	0	0	1	1	0	3
ENSMUSG00000025936	transcribed_unprocessed_pseudogene	Gm4956		chr1	21285246	21298312	13067	-	0	0	0	0	1	1	0	0	0	0	0	1	0	2	0	0	0
ENSMUSG00000094436	processed_pseudogene	Gm16327		chr1	21364803	21365030	228	+	0	0	0	0	0	0	0	0	1	0	0	0	0	0	0	0	0
ENSMUSG00000028033	protein_coding	Kcnq5	overlapping_locus	chr1	21398403	21961942	563540	-	57	146	87	183	155	147	187	147	158	109	122	116	140	101	63	195	103
ENSMUSG00000082935	processed_pseudogene	Gm7658	overlapping_locus	chr1	21511933	21513056	1124	-	84	65	66	59	65	67	84	71	114	79	58	68	42	63	71	79	59
ENSMUSG00000103748	TEC	Gm38243	overlapping_locus	chr1	21838948	21840514	1567	-	0	0	1	0	0	0	0	0	0	0	0	0	0	0	0	0	0
ENSMUSG00000099692	processed_pseudogene	Gm5696	pseudo_consens	chr1	22030064	22030615	552	-	0	0	1	0	0	0	2	0	0	0	0	0	0	0	0	0	0
ENSMUSG00000100418	processed_pseudogene	Gm28239	pseudo_consens	chr1	22237849	22238295	447	+	0	0	0	0	0	1	2	0	1	0	0	0	0	0	0	0	0
ENSMUSG00000041670	protein_coding	Rims1	fragmented_locus	chr1	22286251	22805994	519744	-	5	5	9	8	11	13	11	6	8	4	3	4	9	7	10	9	9
ENSMUSG00000101227	lncRNA	Gm29506	overlapping_locus	chr1	23048295	23235673	187379	-	0	0	0	1	0	0	0	2	0	0	0	0	0	0	0	1	0
ENSMUSG00000097970	lncRNA	Gm27028	ncRNA_host	chr1	23291537	23291935	399	+	2	2	2	6	1	0	2	3	1	5	4	1	0	4	1	5	3
ENSMUSG00000100775	lncRNA	Gm29107		chr1	23293729	23294075	347	+	0	0	1	0	0	0	0	0	0	0	0	0	1	1	1	0	0
ENSMUSG00000026158	protein_coding	Ogfrl1		chr1	23366424	23397772	31349	-	486	641	669	716	578	604	646	670	719	580	672	637	744	601	742	623	610
ENSMUSG00000097920	processed_pseudogene	Gm7784	pseudo_consens	chr1	23479539	23480527	989	+	2	3	4	4	4	2	5	5	1	1	2	2	2	0	1	2	1
ENSMUSG00000026156	protein_coding	B3gat2		chr1	23761753	23849158	87406	+	16	31	36	56	30	22	45	29	29	21	20	30	22	37	30	33	25
ENSMUSG00000026155	protein_coding	Smap1		chr1	23844846	23922317	77472	-	406	465	626	533	468	346	458	445	330	381	358	372	510	348	399	382	362
ENSMUSG00000026154	protein_coding	Sdhaf4		chr1	23995939	24005656	9718	-	233	208	216	245	268	269	244	273	351	257	305	208	203	322	277	301	237
ENSMUSG00000102495	TEC	Gm26524		chr1	24005505	24005894	390	+	0	0	0	1	0	0	0	0	0	0	0	0	1	0	0	0	0
ENSMUSG00000026153	protein_coding	Fam135a		chr1	24011093	24100341	89249	-	1603	1895	2760	2281	1459	1491	1748	1416	1754	1566	1628	1538	2090	1635	1793	1722	1458
ENSMUSG00000102398	TEC	Gm37580		chr1	24100625	24103424	2800	+	2	0	2	2	1	0	0	3	1	0	1	1	0	1	1	1	5
ENSMUSG00000097670	processed_pseudogene	Gm26607	pseudo_consens	chr1	24125275	24126141	867	+	0	0	0	0	0	0	0	0	0	1	0	0	0	0	0	0	0
ENSMUSG00000026147	protein_coding	Col9a1		chr1	24177610	24252684	75075	+	205	256	119	198	199	217	215	191	185	219	342	229	195	195	374	242	185
ENSMUSG00000026141	protein_coding	Col19a1	ncRNA_host	chr1	24261890	24587472	325583	-	1	4	2	4	3	9	0	5	3	2	5	0	5	3	3	7	4
ENSMUSG00000099997	processed_pseudogene	Tubb4b-ps2	pseudo_consens	chr1	24594087	24595423	1337	-	6	8	14	4	10	1	4	5	3	6	4	2	11	1	9	3	6
ENSMUSG00000100131	unprocessed_pseudogene	Gm28439	overlapping_locus	chr1	24611535	24612410	876	-	0	1	0	0	0	0	1	0	0	1	0	0	0	0	1	1	1
ENSMUSG00000067736	unprocessed_pseudogene	Gm10222	overlapping_locus	chr1	24612407	24612700	294	-	1	0	0	0	0	0	0	1	0	0	0	0	0	0	0	0	0
ENSMUSG00000101939	unprocessed_pseudogene	Gm28438		chr1	24612775	24613119	345	-	15	11	14	7	18	21	15	4	17	11	2	11	23	16	4	16	7
ENSMUSG00000101111	unprocessed_pseudogene	Gm28437		chr1	24613189	24613971	783	-	1	0	0	2	1	2	2	2	0	1	0	1	0	2	1	3	2
ENSMUSG00000100862	unprocessed_pseudogene	Gm10925		chr1	24613974	24614651	678	-	2	3	1	2	5	1	4	2	2	6	4	4	1	9	4	5	5
ENSMUSG00000102070	unprocessed_pseudogene	Gm28661		chr1	24614885	24615565	681	-	1	2	2	1	1	2	0	4	1	0	1	4	0	1	4	1	0
ENSMUSG00000101249	unprocessed_pseudogene	Gm29216		chr1	24615706	24616197	492	-	0	0	3	2	2	4	1	0	3	2	0	1	1	3	0	0	0
ENSMUSG00000073725	protein_coding	Lmbrd1		chr1	24678630	24766301	87672	+	1092	1246	1337	1580	1250	1043	1256	1251	1326	1263	1342	1195	1500	1044	1341	1204	1076
ENSMUSG00000100450	processed_pseudogene	Gm9443	pseudo_consens	chr1	25011941	25012756	816	+	0	0	0	0	0	0	0	0	0	0	0	0	0	0	0	0	0
ENSMUSG00000033569	protein_coding	Adgrb3	overlapping_locus	chr1	25067476	25829707	762232	-	2	14	3	6	7	4	5	3	2	4	3	5	7	3	6	4	7
ENSMUSG00000103889	TEC	Gm37011	overlapping_locus	chr1	25608250	25611184	2935	-	0	1	2	0	0	0	0	0	0	0	0	0	0	0	0	0	0
ENSMUSG00000101301	processed_pseudogene	Gm29214	overlapping_locus	chr1	25614946	25615515	570	-	0	0	1	0	0	1	0	0	2	0	0	0	0	1	0	0	0
ENSMUSG00000102250	TEC	Gm38260	overlapping_locus	chr1	25672245	25676239	3995	-	0	0	0	0	0	0	1	0	0	0	0	0	0	0	0	0	0
ENSMUSG00000102659	TEC	Gm37077	overlapping_locus	chr1	25755343	25759033	3691	-	0	3	2	0	1	0	0	0	0	0	0	1	0	0	0	0	0
ENSMUSG00000104132	TEC	Gm36952	overlapping_locus	chr1	25797281	25800905	3625	-	0	0	0	0	0	0	0	0	0	0	0	0	0	0	0	1	0
ENSMUSG00000102747	TEC	Gm37602	overlapping_locus	chr1	25804097	25807406	3310	-	0	0	0	0	0	0	0	0	0	0	0	0	0	0	0	0	0
ENSMUSG00000104516	TEC	Gm9884		chr1	25830657	25831878	1222	+	0	0	0	0	0	0	0	0	1	0	1	0	0	0	0	0	0
ENSMUSG00000099458	processed_pseudogene	Gm19123	pseudo_consens	chr1	26466236	26466886	651	+	0	0	0	1	0	0	0	0	0	0	0	0	0	0	0	0	0
ENSMUSG00000073722	protein_coding	4931408C20Rik		chr1	26681814	26687460	5647	-	0	0	0	0	0	0	1	2	1	0	0	0	1	1	0	0	0
ENSMUSG00000100310	processed_pseudogene	Gm19641	pseudo_consens	chr1	27336352	27336768	417	-	0	0	0	0	0	0	0	0	0	0	1	0	0	0	0	0	1
ENSMUSG00000101372	processed_pseudogene	Gm19028	overlapping_locus	chr1	27989910	27991782	1873	+	2	5	2	4	3	1	3	5	4	3	1	1	6	1	0	5	2
ENSMUSG00000086240	processed_pseudogene	Gm7846	pseudo_consens	chr1	28580499	28580772	274	-	0	1	0	0	0	0	0	1	0	1	0	0	0	1	1	1	0
ENSMUSG00000081557	processed_pseudogene	Gm5697	pseudo_consens	chr1	28800240	28802721	2482	-	0	0	2	0	2	1	3	1	4	2	2	0	2	5	0	3	0
ENSMUSG00000101235	processed_pseudogene	Gm18033	pseudo_consens	chr1	29219700	29220249	550	+	0	1	0	0	0	0	0	0	0	0	0	0	0	0	0	0	0
ENSMUSG00000099492	processed_pseudogene	Gm5525	pseudo_consens	chr1	29484604	29485915	1312	-	4	3	10	8	7	6	6	11	5	3	1	5	4	6	3	5	3
ENSMUSG00000101726	processed_pseudogene	Gm7858	pseudo_consens	chr1	29930094	29930715	622	+	0	2	1	1	2	1	2	2	1	2	1	1	1	2	0	2	0
ENSMUSG00000100261	unprocessed_pseudogene	Gm6473		chr1	30769687	30771815	2129	+	0	3	0	0	0	1	2	2	1	1	0	1	0	2	0	0	1
ENSMUSG00000048874	protein_coding	Phf3	overlapping_locus	chr1	30802339	30873921	71583	-	1282	1755	1828	1817	1621	1377	1680	1360	1287	1342	1454	1513	1865	1283	1636	1448	1533
ENSMUSG00000103783	TEC	Gm37522	overlapping_locus	chr1	30833548	30836431	2884	-	1	0	0	0	0	0	1	0	2	0	0	0	3	0	1	0	0
ENSMUSG00000104315	TEC	Gm37906	overlapping_locus	chr1	30865504	30868538	3035	-	0	1	1	1	0	0	0	0	0	0	1	2	1	0	1	0	0
ENSMUSG00000026064	protein_coding	Ptp4a1		chr1	30940302	30949309	9008	-	8	5	8	9	10	6	4	7	7	9	9	9	10	13	12	7	15
ENSMUSG00000086726	processed_pseudogene	Gm9458	pseudo_consens	chr1	30986225	30986953	729	-	0	0	0	0	1	0	0	0	0	0	0	0	0	0	0	0	0
ENSMUSG00000086727	protein_coding	4931428L18Rik	retrogene	chr1	30997842	31222684	224843	-	3	5	1	5	2	7	4	7	6	3	4	3	3	4	0	1	1
ENSMUSG00000100237	lncRNA	Gm28644		chr1	31041919	31043675	1757	+	0	0	0	0	0	0	0	1	1	0	0	1	1	0	1	0	1
ENSMUSG00000100910	lncRNA	Gm29128		chr1	31136026	31150105	14080	+	0	0	0	0	0	0	0	0	0	0	0	0	0	0	0	1	0
ENSMUSG00000099796	processed_pseudogene	Gm7893	pseudo_consens	chr1	31164549	31164773	225	+	0	1	0	0	0	0	0	0	0	0	0	0	0	0	0	0	0
ENSMUSG00000100592	processed_pseudogene	Gm28645	pseudo_consens	chr1	31274892	31275455	564	+	0	0	0	0	0	0	0	0	1	0	0	0	0	0	0	0	0
ENSMUSG00000101093	processed_pseudogene	Eef1a1-ps2	pseudo_consens	chr1	31559540	31561400	1861	+	0	1	0	0	0	1	0	1	0	0	0	0	0	0	1	1	1
ENSMUSG00000070960	processed_pseudogene	Gm19680	pseudo_consens	chr1	31615149	31616661	1513	+	1	1	1	0	1	0	3	2	4	0	4	0	3	2	2	1	1
ENSMUSG00000088620	snRNA	Gm23032		chr1	31656632	31656738	107	-	0	0	0	0	0	0	0	0	0	0	0	0	0	0	0	0	0
ENSMUSG00000082159	processed_pseudogene	Gm7910	pseudo_consens	chr1	31736057	31736891	835	+	0	0	0	0	0	0	0	0	0	0	0	1	0	0	0	0	0
ENSMUSG00000026058	protein_coding	Khdrbs2	overlapping_locus	chr1	32172714	32658568	485855	+	3	0	1	1	4	3	3	1	0	1	1	1	1	2	2	0	5
ENSMUSG00000104498	TEC	Gm37110	overlapping_locus	chr1	32485315	32486942	1628	+	0	0	0	0	0	0	0	0	0	0	0	0	0	1	0	0	0
ENSMUSG00000100481	processed_pseudogene	Gm7114	pseudo_consens	chr1	33100907	33102695	1789	+	1	1	0	0	1	0	0	2	0	0	2	1	1	1	2	3	1
ENSMUSG00000100590	processed_pseudogene	Gm4785	pseudo_consens	chr1	33108905	33109655	751	-	0	1	3	1	0	0	0	0	1	0	0	0	0	0	1	0	0
ENSMUSG00000101612	processed_pseudogene	Gm7933	pseudo_consens	chr1	33371331	33373585	2255	+	0	0	0	0	1	0	0	0	1	0	0	0	1	1	1	1	1
ENSMUSG00000026134	protein_coding	Prim2	overlapping_locus	chr1	33453810	33669795	215986	-	281	342	498	382	331	290	332	340	343	240	243	264	280	331	353	290	290
ENSMUSG00000101682	processed_pseudogene	Gm29228	pseudo_consens	chr1	33482101	33482518	418	+	2	1	1	3	1	2	2	4	2	2	1	1	3	1	4	4	1
ENSMUSG00000102714	TEC	Gm37618	overlapping_locus	chr1	33613758	33616832	3075	-	1	0	0	0	0	0	0	0	1	1	0	1	0	0	0	0	1
ENSMUSG00000102093	processed_pseudogene	Gm17813	pseudo_consens	chr1	33657781	33658108	328	+	0	0	0	0	0	0	0	0	0	0	0	1	1	1	0	0	0
ENSMUSG00000103746	TEC	1700001G17Rik		chr1	33669824	33670712	889	+	7	5	9	7	6	10	10	9	11	7	9	7	8	8	15	9	8
ENSMUSG00000102198	TEC	Gm38173	overlapping_locus	chr1	33671915	33674228	2314	-	0	0	0	1	0	0	0	0	0	0	0	0	1	0	0	0	0
ENSMUSG00000004768	protein_coding	Rab23		chr1	33719887	33742564	22678	+	294	366	392	369	322	308	393	316	311	299	310	333	378	321	377	338	333
ENSMUSG00000042215	protein_coding	Bag2		chr1	33745484	33757795	12312	-	196	206	221	260	261	253	239	217	248	202	211	160	177	214	225	234	167
ENSMUSG00000042197	protein_coding	Zfp451		chr1	33761545	33814595	53051	-	581	743	773	760	661	573	713	616	593	629	646	693	722	583	661	734	678
ENSMUSG00000081402	processed_pseudogene	Gm15455		chr1	33836124	33838680	2557	-	1	0	1	2	0	0	0	1	2	1	0	0	1	0	1	1	1
ENSMUSG00000042182	protein_coding	Bend6	overlapping_locus	chr1	33852052	33907816	55765	-	12	16	19	17	19	17	12	31	17	7	20	13	15	14	17	25	17
ENSMUSG00000104416	TEC	Gm37067	overlapping_locus	chr1	33889490	33891117	1628	-	0	0	0	0	0	0	0	1	0	0	0	0	0	0	0	0	0
ENSMUSG00000026131	protein_coding	Dst	overlapping_locus	chr1	33908225	34308661	400437	+	14821	24650	25752	24755	17961	17578	18747	18098	18933	21677	19886	23039	26467	14425	20368	18212	18194
ENSMUSG00000103596	TEC	Gm37354	overlapping_locus	chr1	33922455	33924838	2384	+	0	1	0	0	0	0	0	0	0	0	0	0	0	0	0	0	0
ENSMUSG00000084506	snRNA	Gm23792		chr1	33981410	33981502	93	-	0	0	0	1	0	0	0	0	0	0	0	0	0	0	0	0	0
ENSMUSG00000103364	TEC	Gm38157	overlapping_locus	chr1	34032100	34033797	1698	+	4	2	2	2	0	3	2	1	3	1	3	4	2	1	5	7	2
ENSMUSG00000096992	lncRNA	Gm26788		chr1	34165856	34178446	12591	-	214	328	320	512	260	241	350	308	245	304	279	386	475	308	233	330	287
ENSMUSG00000103001	TEC	A930005N03Rik		chr1	34269882	34271128	1247	-	0	0	0	0	0	0	0	0	0	0	0	0	0	0	0	0	0
ENSMUSG00000101206	processed_pseudogene	Gm5266	pseudo_consens	chr1	34367371	34369003	1633	+	0	0	0	1	0	0	0	0	0	0	0	0	0	0	0	0	0
ENSMUSG00000101462	transcribed_processed_pseudogene	Gm3052		chr1	34415050	34417986	2937	-	5	2	3	7	1	1	5	1	2	1	1	5	5	10	3	2	3
ENSMUSG00000102336	lncRNA	Gm37233	ncRNA_host	chr1	34427002	34433264	6263	-	9	14	13	13	6	0	10	7	6	5	12	11	14	12	14	10	7
ENSMUSG00000042111	protein_coding	Ccdc115		chr1	34436670	34439672	3003	-	563	511	536	589	578	544	581	518	590	451	478	472	507	506	599	504	413
ENSMUSG00000101711	lncRNA	Gm28306		chr1	34439511	34444730	5220	-	0	2	3	5	0	1	0	0	2	2	2	0	0	1	0	3	0
ENSMUSG00000026127	protein_coding	Imp4		chr1	34439851	34449356	9506	+	685	759	1056	810	755	653	847	692	723	685	610	641	772	714	795	722	656
ENSMUSG00000026126	protein_coding	Ptpn18		chr1	34459762	34475733	15972	+	119	98	57	146	51	85	92	91	99	61	105	97	77	116	107	99	87
ENSMUSG00000100280	lncRNA	Gm28417		chr1	34468834	34473148	4315	-	5	4	3	5	4	1	5	5	4	1	4	2	11	9	1	2	8
ENSMUSG00000101223	lncRNA	4930568A12Rik		chr1	34477167	34485933	8767	-	0	0	0	0	0	0	0	2	0	0	0	0	0	0	1	0	0
ENSMUSG00000026125	protein_coding	Prss39		chr1	34498410	34503063	4654	+	0	0	2	0	0	0	0	0	0	0	0	0	1	0	0	0	0
ENSMUSG00000037509	protein_coding	Arhgef4	overlapping_locus	chr1	34678188	34813309	135122	+	736	1047	1284	1118	906	820	943	819	903	806	815	963	1165	744	932	919	828
ENSMUSG00000102537	processed_pseudogene	Gm37224		chr1	34752775	34752922	148	+	0	0	0	1	0	0	0	0	0	0	0	0	0	0	0	0	1
ENSMUSG00000104002	lncRNA	Gm38336		chr1	34809360	34811908	2549	-	15	19	23	25	22	18	25	21	13	12	7	13	27	32	24	24	12
ENSMUSG00000037503	protein_coding	Fam168b		chr1	34813219	34843065	29847	-	2922	3967	3992	3719	3331	2990	3505	2973	3035	3179	3103	3173	3816	2793	3631	3228	3045
ENSMUSG00000104358	TEC	Gm37127		chr1	34823525	34826560	3036	+	8	8	6	14	9	5	7	3	9	5	7	12	9	6	11	15	7
ENSMUSG00000026123	protein_coding	Plekhb2		chr1	34849976	34879580	29605	+	890	1103	1433	1087	853	920	1032	933	868	953	923	893	1092	826	993	997	852
ENSMUSG00000103548	processed_pseudogene	Gm37670	pseudo_consens	chr1	34969627	34969855	229	-	2	2	0	1	1	0	0	0	2	1	4	2	2	1	2	4	4
ENSMUSG00000103760	processed_pseudogene	Gm8009	pseudo_consens	chr1	34970065	34970500	436	+	0	0	0	0	0	0	0	1	0	0	0	0	1	0	0	0	0
ENSMUSG00000104417	lncRNA	Gm37068		chr1	35625606	35651297	25692	-	0	0	0	1	1	0	0	0	1	1	4	0	0	1	2	1	1
ENSMUSG00000101714	lncRNA	Gm28415		chr1	35806974	35810462	3489	+	0	1	0	0	0	0	0	0	0	0	0	0	0	0	0	1	0
ENSMUSG00000102531	lncRNA	1110002O04Rik		chr1	35879845	35881119	1275	+	1	1	1	1	3	1	2	2	4	0	0	1	0	1	1	3	0
ENSMUSG00000103096	processed_pseudogene	Gm8022	pseudo_consens	chr1	35958919	35959822	904	+	0	0	1	0	0	0	1	0	0	1	0	0	0	0	0	0	0
ENSMUSG00000102279	lncRNA	Gm37146		chr1	35981960	35986373	4414	-	0	0	0	1	0	0	0	0	0	2	0	1	0	0	1	0	0
ENSMUSG00000104201	lncRNA	4930535G08Rik		chr1	36011072	36011894	823	+	0	0	0	1	0	0	0	0	0	0	0	0	0	0	0	0	0
ENSMUSG00000102434	TEC	Gm38049		chr1	36029647	36031018	1372	-	0	0	0	0	0	0	0	0	1	0	0	0	0	0	0	0	1
ENSMUSG00000045216	protein_coding	Hs6st1		chr1	36068400	36106446	38047	+	784	1074	1153	1064	1004	856	1037	869	818	923	879	1021	1211	787	1041	1003	854
ENSMUSG00000102202	lncRNA	Gm33280		chr1	36132042	36138746	6705	+	0	0	0	5	1	2	2	0	1	0	0	1	1	1	8	0	0
ENSMUSG00000037470	protein_coding	Uggt1	ncRNA_host	chr1	36140027	36244720	104694	-	1248	1595	1986	1694	1482	1241	1416	1273	1284	1253	1328	1423	1676	1311	1459	1547	1377
ENSMUSG00000047180	protein_coding	Neurl3		chr1	36264597	36274679	10083	-	136	94	141	170	118	113	149	104	128	101	134	158	154	147	191	117	135
ENSMUSG00000037447	protein_coding	Arid5a		chr1	36307733	36324029	16297	+	219	298	221	274	204	265	245	217	228	260	209	310	288	213	275	232	222
ENSMUSG00000102762	lncRNA	4930403P22Rik		chr1	36332708	36333420	713	+	1	0	0	0	0	0	0	1	0	0	2	1	0	0	0	3	1
ENSMUSG00000010453	protein_coding	Kansl3	ncRNA_host	chr1	36335730	36369181	33452	-	1153	1559	1436	1773	1440	1299	1416	1260	1287	1276	1276	1410	1531	1239	1444	1377	1274
ENSMUSG00000037432	protein_coding	Fer1l5		chr1	36372291	36422110	49820	+	24	31	43	50	37	36	44	28	40	39	35	47	27	34	26	42	38
ENSMUSG00000001143	protein_coding	Lman2l		chr1	36419871	36445271	25401	-	241	266	312	343	251	262	250	270	252	222	229	270	339	291	320	358	262
ENSMUSG00000037408	protein_coding	Cnnm4	ncRNA_host	chr1	36471620	36508764	37145	+	196	261	317	307	275	222	249	239	223	192	274	252	368	216	288	266	234
ENSMUSG00000104316	TEC	Gm37909		chr1	36473952	36476110	2159	+	4	15	14	21	6	2	6	9	11	3	10	10	33	4	15	6	5
ENSMUSG00000001138	protein_coding	Cnnm3		chr1	36511867	36528237	16371	+	481	692	706	715	603	503	608	549	558	545	555	596	723	516	680	595	527
ENSMUSG00000067653	protein_coding	Ankrd23		chr1	36530188	36536883	6696	-	96	133	89	142	108	117	130	128	156	114	138	115	132	103	79	125	91
ENSMUSG00000079610	protein_coding	Ankrd39	overlapping_locus	chr1	36537507	36547445	9939	-	92	102	100	112	93	92	101	95	120	100	78	105	85	124	127	113	110
ENSMUSG00000026121	protein_coding	Sema4c		chr1	36548639	36558349	9711	-	644	721	677	769	609	572	665	561	507	448	517	706	777	604	745	715	713
ENSMUSG00000087589	lncRNA	D430040D24Rik		chr1	36557701	36565613	7913	+	51	52	58	87	53	59	64	60	47	54	49	47	69	48	54	59	49
ENSMUSG00000046337	protein_coding	Fam178b		chr1	36562692	36683183	120492	-	60	65	58	72	59	50	69	61	43	47	32	66	49	51	56	52	53
ENSMUSG00000089906	processed_pseudogene	Gm6428	pseudo_consens	chr1	36601802	36602146	345	+	0	0	1	1	0	0	0	0	0	0	0	0	0	0	0	0	0
ENSMUSG00000061518	protein_coding	Cox5b		chr1	36691449	36693681	2233	+	895	892	956	868	905	1023	1019	1155	1261	906	800	872	897	994	1009	1023	816
ENSMUSG00000037351	protein_coding	Actr1b		chr1	36698114	36714422	16309	-	1619	1996	2177	2096	1933	1737	1842	1735	1828	1883	1644	1728	1842	1709	1810	1921	1624
ENSMUSG00000102416	protein_coding	4933424G06Rik		chr1	36710149	36757953	47805	+	1	0	0	1	2	1	2	4	3	0	2	5	2	2	0	0	5
ENSMUSG00000104237	lncRNA	Gm33533		chr1	36739048	36744792	5745	-	1	0	0	0	0	0	0	0	1	0	0	0	0	0	0	0	0
ENSMUSG00000026117	protein_coding	Zap70		chr1	36761798	36782818	21021	+	24	25	20	20	23	19	16	21	13	21	18	30	24	20	33	22	19
ENSMUSG00000026116	protein_coding	Tmem131	overlapping_locus	chr1	36792191	36943666	151476	-	1734	2546	3108	2904	2239	2012	2294	1923	1915	1810	1863	2144	2988	1699	2189	2135	1972
ENSMUSG00000103016	TEC	Gm37506		chr1	36871903	36872045	143	-	0	0	1	0	0	0	0	0	0	0	0	0	0	0	0	0	0
ENSMUSG00000102930	lncRNA	Gm38115	overlapping_locus	chr1	36913601	36916539	2939	-	0	1	0	1	1	0	0	0	0	0	0	3	0	0	0	0	0
ENSMUSG00000103159	TEC	F830112A20Rik		chr1	36922797	36926348	3552	-	0	1	0	1	0	0	1	0	1	0	0	1	0	0	0	2	0
ENSMUSG00000080054	processed_pseudogene	Rpl12-ps1	pseudo_consens	chr1	36957930	36958427	498	-	2	1	1	0	0	0	1	5	0	3	2	0	1	2	0	3	0
ENSMUSG00000095944	rRNA	n-R5s210		chr1	37005439	37005557	119	+	0	0	0	0	0	0	0	0	0	0	0	0	0	0	1	0	0
ENSMUSG00000050122	protein_coding	Vwa3b		chr1	37026596	37187613	161018	+	16	8	4	19	11	11	15	10	9	6	6	11	7	6	10	5	9
ENSMUSG00000026114	protein_coding	Cnga3		chr1	37214434	37263384	48951	+	3	6	1	4	4	1	2	2	1	1	1	1	2	1	6	1	1
ENSMUSG00000026113	protein_coding	Inpp4a		chr1	37299865	37410736	110872	+	309	388	420	484	352	312	367	350	323	355	372	437	451	347	395	439	371
ENSMUSG00000086064	lncRNA	4930439A04Rik		chr1	37329667	37334172	4506	-	0	0	0	0	0	0	0	0	0	0	0	0	0	0	0	0	0
ENSMUSG00000026112	protein_coding	Coa5		chr1	37417084	37430103	13020	-	2426	3055	3230	2990	2891	2510	2768	2533	2709	2515	2724	2599	2788	2368	2930	2712	2432
ENSMUSG00000026111	protein_coding	Unc50		chr1	37430139	37439124	8986	+	1399	1198	1268	1477	1360	1292	1540	1265	1652	1392	1312	1160	1188	1383	1424	1312	1236
ENSMUSG00000026110	protein_coding	Mgat4a	overlapping_locus	chr1	37439340	37541016	101677	-	257	308	263	309	256	230	263	250	265	318	305	360	327	234	316	233	260
ENSMUSG00000103948	TEC	4930594C11Rik		chr1	37485851	37488605	2755	-	0	0	0	0	1	0	0	2	0	0	0	0	0	0	0	0	1
ENSMUSG00000026090	protein_coding	2010300C02Rik	overlapping_locus	chr1	37611677	37720085	108409	-	587	792	788	747	621	588	626	544	464	581	586	581	740	497	602	484	485
ENSMUSG00000089767	lncRNA	4930556I23Rik		chr1	37614259	37615372	1114	+	2	3	1	4	6	0	2	3	2	2	0	1	6	0	3	2	3
ENSMUSG00000104365	TEC	4930470B04Rik		chr1	37660722	37662647	1926	+	0	1	0	0	0	0	0	0	0	0	0	0	0	0	0	0	1
ENSMUSG00000102650	TEC	Gm19863		chr1	37694447	37696664	2218	-	0	2	4	2	2	2	1	3	1	0	0	0	1	0	0	3	1
ENSMUSG00000060771	protein_coding	Tsga10		chr1	37754776	37866429	111654	-	41	61	76	74	54	65	79	60	72	61	70	60	79	89	111	95	85
ENSMUSG00000097268	lncRNA	Gm26805		chr1	37865299	37871388	6090	+	2	0	0	0	0	0	0	0	1	0	0	0	1	0	0	0	0
ENSMUSG00000037216	protein_coding	Lipt1		chr1	37871738	37876228	4491	+	67	80	79	61	54	55	55	60	78	62	50	63	82	67	60	56	57
ENSMUSG00000026088	protein_coding	Mitd1		chr1	37874801	37890411	15611	-	422	367	411	478	303	330	399	292	427	352	313	354	353	332	293	328	318
ENSMUSG00000026087	protein_coding	Mrpl30		chr1	37890477	37898535	8059	+	1198	1068	1343	1316	1311	1279	1212	1158	1353	1216	1236	978	1014	1137	1185	1165	969
ENSMUSG00000061584	protein_coding	Lyg2		chr1	37905923	37916493	10571	-	94	135	69	16	128	92	43	23	56	114	314	86	209	38	72	31	49
ENSMUSG00000087374	lncRNA	Gm15457		chr1	37933596	37954136	20541	+	0	0	0	0	0	0	0	0	0	0	0	0	0	0	0	0	0
ENSMUSG00000026085	protein_coding	Lyg1		chr1	37946736	37957759	11024	-	0	2	1	0	0	0	0	0	1	1	2	0	1	0	0	0	1
ENSMUSG00000058407	protein_coding	Txndc9		chr1	37985189	37997893	12705	-	1076	1074	1337	1214	1075	994	1095	1080	1197	1105	1154	964	1013	1104	1138	1054	942
ENSMUSG00000026083	protein_coding	Eif5b		chr1	37998010	38055579	57570	+	2463	3325	3835	3190	3105	2632	2518	1926	2237	2535	2694	2661	2997	1684	2960	2769	2398
ENSMUSG00000026082	protein_coding	Rev1	overlapping_locus	chr1	38052786	38129801	77016	-	310	428	414	495	399	350	421	412	384	331	325	337	363	350	379	429	347
ENSMUSG00000103804	lncRNA	Gm37062	overlapping_locus	chr1	38076295	38077305	1011	-	4	3	3	8	3	4	4	1	3	0	0	3	5	3	1	8	3
ENSMUSG00000037138	protein_coding	Aff3		chr1	38177326	38664955	487630	-	397	826	636	858	585	631	770	684	761	529	651	609	757	546	810	667	795
ENSMUSG00000085391	lncRNA	Gm16150		chr1	38235420	38246666	11247	+	2	2	0	1	1	0	1	1	0	0	1	0	0	0	0	0	0
ENSMUSG00000085280	lncRNA	Gm16151		chr1	38307902	38311930	4029	+	0	0	0	0	0	0	0	0	0	0	0	0	1	1	0	1	1
ENSMUSG00000087131	lncRNA	Gm16152		chr1	38384949	38393974	9026	+	0	0	1	1	0	0	0	1	0	0	0	0	0	1	0	0	0
ENSMUSG00000102984	processed_pseudogene	Gm34727	pseudo_consens	chr1	38487519	38488047	529	+	0	0	0	0	0	0	0	0	0	0	0	0	1	0	0	0	0
ENSMUSG00000048814	protein_coding	Lonrf2		chr1	38793645	38836711	43067	-	4	17	16	22	18	12	20	16	20	18	19	21	28	21	30	19	24
ENSMUSG00000026080	protein_coding	Chst10		chr1	38863867	38898161	34295	-	31	67	44	41	41	52	57	39	50	47	66	49	48	53	78	52	53
ENSMUSG00000102447	processed_pseudogene	Gm6621	pseudo_consens	chr1	38907945	38908716	772	+	4	4	6	7	9	5	4	4	5	7	5	3	2	3	1	8	5
ENSMUSG00000026078	protein_coding	Pdcl3		chr1	38985608	38997238	11631	+	674	795	877	883	824	819	838	810	937	781	718	727	826	850	883	836	746
ENSMUSG00000103046	TEC	Gm37309		chr1	38992678	38994316	1639	+	15	17	10	26	13	14	15	10	8	8	8	17	19	14	17	19	8
ENSMUSG00000103182	TEC	Gm37091		chr1	39081252	39083338	2087	-	0	0	1	0	0	0	0	0	0	0	0	0	0	0	0	0	0
ENSMUSG00000026077	protein_coding	Npas2	overlapping_locus	chr1	39193731	39363236	169506	+	127	218	331	191	228	205	226	199	128	178	138	199	212	134	198	137	145
ENSMUSG00000092553	processed_pseudogene	Gm20428	pseudo_consens	chr1	39276283	39276565	283	-	0	0	0	1	0	0	1	0	0	0	1	0	0	0	0	0	0
ENSMUSG00000092563	processed_pseudogene	Gm3617	overlapping_locus	chr1	39314899	39315453	555	+	4	1	0	4	5	0	3	3	1	2	2	3	1	1	4	1	1
ENSMUSG00000073702	protein_coding	Rpl31		chr1	39367842	39371911	4070	+	81	62	112	91	87	91	85	101	125	98	109	71	65	111	103	104	83
ENSMUSG00000003134	protein_coding	Tbc1d8		chr1	39371492	39478755	107264	-	602	789	746	998	814	706	785	663	762	673	645	772	795	652	687	711	624
ENSMUSG00000102607	TEC	Gm37265		chr1	39419048	39419932	885	-	0	0	0	0	1	0	0	1	0	0	0	0	0	0	0	0	0
ENSMUSG00000003135	protein_coding	Cnot11		chr1	39534992	39546889	11898	+	617	783	788	728	795	728	700	618	658	630	636	624	700	604	728	621	641
ENSMUSG00000085894	lncRNA	Gm15832	overlapping_locus	chr1	39547570	39552002	4433	-	19	28	19	44	28	23	30	29	27	19	12	35	35	33	26	29	17
ENSMUSG00000077704	snoRNA	Snord89		chr1	39548745	39548854	110	-	1	2	4	5	3	3	0	1	3	2	0	2	2	3	4	2	1
ENSMUSG00000048234	protein_coding	Rnf149	overlapping_locus	chr1	39551296	39577405	26110	-	886	909	1072	957	943	921	999	944	950	928	929	807	976	840	956	817	766
ENSMUSG00000064936	snoRNA	Gm23722		chr1	39573746	39573875	130	-	0	0	0	0	0	0	0	0	1	0	0	0	1	0	0	1	0
ENSMUSG00000102471	processed_pseudogene	Gm5100	pseudo_consens	chr1	39597417	39598005	589	-	2	1	2	0	2	2	2	2	0	1	1	2	4	0	3	2	2
ENSMUSG00000050967	protein_coding	Creg2		chr1	39618406	39651474	33069	-	7	15	3	10	2	7	4	6	3	11	6	7	8	6	7	7	10
ENSMUSG00000097083	lncRNA	D930019O06Rik		chr1	39650176	39657390	7215	+	0	0	1	0	1	1	1	3	1	0	0	4	1	0	0	0	0
ENSMUSG00000057173	protein_coding	Rfx8		chr1	39665301	39720997	55697	-	10	4	1	5	4	2	9	4	1	3	5	4	6	3	3	6	3
ENSMUSG00000091937	protein_coding	Gm3646		chr1	39804148	39805332	1185	-	0	3	3	3	0	1	4	0	2	0	2	3	1	1	2	1	0
ENSMUSG00000101634	lncRNA	1700066B17Rik		chr1	39839175	39847334	8160	-	0	0	0	0	1	0	2	0	0	0	0	1	0	0	0	0	0
ENSMUSG00000026074	protein_coding	Map4k4		chr1	39900913	40026310	125398	+	2648	3628	3854	3653	3081	2857	3372	2781	2736	3066	3104	3179	3982	2638	3667	3098	2877
ENSMUSG00000102985	TEC	4930456G14Rik		chr1	40049039	40050368	1330	-	0	1	1	4	1	5	1	4	2	8	3	0	3	3	5	1	2
ENSMUSG00000026073	protein_coding	Il1r2		chr1	40074079	40125231	51153	+	1387	1554	1365	1802	1456	1473	1681	1576	1680	1765	1804	1490	1978	1448	1341	1273	1329
ENSMUSG00000097899	lncRNA	Gm16894		chr1	40076228	40085851	9624	-	6	13	18	10	9	6	10	10	19	8	16	16	11	13	9	13	11
ENSMUSG00000102975	TEC	Gm37347		chr1	40088511	40091581	3071	+	0	0	0	2	2	1	1	2	4	2	0	8	4	0	2	1	2
ENSMUSG00000026072	protein_coding	Il1r1		chr1	40225080	40317257	92178	+	869	1053	1252	1302	886	749	1019	771	879	832	882	970	1213	954	948	851	876
ENSMUSG00000103560	TEC	Gm38070		chr1	40238020	40244499	6480	+	0	1	1	0	1	0	0	0	0	0	0	1	0	2	0	1	0
ENSMUSG00000070942	protein_coding	Il1rl2		chr1	40324610	40367562	42953	+	1634	1869	2655	2173	1518	1474	1750	1377	1516	1723	1550	1660	2039	1457	1591	1553	1470
ENSMUSG00000103230	processed_pseudogene	Gm17970	pseudo_consens	chr1	40353852	40354536	685	+	7	22	29	42	8	19	28	17	21	25	20	18	36	25	14	19	18
ENSMUSG00000026069	protein_coding	Il1rl1		chr1	40429570	40465415	35846	+	34	41	70	137	41	38	80	62	68	50	57	79	114	59	55	40	55
ENSMUSG00000026070	protein_coding	Il18r1		chr1	40465552	40500854	35303	+	94	94	70	133	62	73	87	68	93	103	113	106	139	77	92	91	88
ENSMUSG00000026068	protein_coding	Il18rap		chr1	40515362	40551705	36344	+	28	38	26	51	16	15	30	14	15	28	32	36	42	23	28	18	14
ENSMUSG00000026065	protein_coding	Slc9a4		chr1	40580081	40630725	50645	+	9	9	11	5	3	3	5	6	3	5	8	4	6	8	8	7	7
ENSMUSG00000102676	TEC	Gm37435		chr1	40582895	40586841	3947	-	1	5	3	4	4	4	7	3	1	3	8	6	4	8	2	10	5
ENSMUSG00000026062	protein_coding	Slc9a2		chr1	40680574	40769273	88700	+	83	133	60	128	113	120	93	99	96	104	111	120	108	92	84	138	71
ENSMUSG00000103679	lncRNA	Gm37623		chr1	40691442	40697636	6195	-	1	0	0	0	0	0	0	0	0	0	0	0	1	0	1	0	0
ENSMUSG00000103270	lncRNA	Gm37915		chr1	40771385	40785343	13959	+	4	8	3	8	3	3	6	5	0	5	7	5	1	4	4	6	1
ENSMUSG00000041945	protein_coding	Mfsd9		chr1	40772038	40790687	18650	-	54	67	72	59	67	60	74	44	66	72	56	66	70	48	52	76	68
ENSMUSG00000079588	protein_coding	Tmem182		chr1	40805601	40856887	51287	+	545	988	724	1092	1093	872	884	984	1039	999	929	939	1155	689	516	1067	706
ENSMUSG00000100832	lncRNA	Gm29260		chr1	41781808	41939560	157753	+	0	0	0	1	0	0	0	0	0	0	0	0	0	0	0	0	0
ENSMUSG00000100178	processed_pseudogene	Gm5267	pseudo_consens	chr1	42103289	42104333	1045	+	0	0	0	0	0	0	0	0	0	1	0	1	0	0	1	0	0
ENSMUSG00000101877	processed_pseudogene	Gm8176	pseudo_consens	chr1	42179290	42180388	1099	-	1	0	0	0	0	0	0	0	0	0	0	0	1	0	0	0	0
ENSMUSG00000101299	lncRNA	Gm28175		chr1	42261855	42304412	42558	+	0	0	0	0	0	0	0	0	0	0	0	0	0	0	0	0	0
ENSMUSG00000060424	lncRNA	Pantr1		chr1	42590782	42694842	104061	-	25	20	17	24	3	18	17	17	16	33	44	40	32	20	27	30	25
ENSMUSG00000093436	lncRNA	Gm20646	overlapping_locus	chr1	42694925	42744791	49867	+	1	0	1	0	2	1	1	0	1	1	2	2	4	4	2	1	0
ENSMUSG00000045515	protein_coding	Pou3f3	overlapping_locus	chr1	42694925	42703176	8252	+	53	91	78	82	63	80	85	78	88	87	109	84	130	86	121	120	86
ENSMUSG00000097063	lncRNA	Pantr2		chr1	42707061	42713454	6394	-	1	3	2	3	1	1	0	3	4	0	5	0	2	4	3	2	0
ENSMUSG00000099784	lncRNA	Dalir		chr1	42750712	42752881	2170	+	0	0	0	0	1	0	0	0	0	0	0	0	0	0	0	1	1
ENSMUSG00000060679	protein_coding	Mrps9		chr1	42851233	42905683	54451	+	906	844	939	1055	880	899	929	890	1039	842	858	719	832	810	876	808	699
ENSMUSG00000077448	snoRNA	Gm23126		chr1	42866685	42866818	134	-	0	0	0	0	0	0	0	0	0	0	0	1	0	0	0	0	0
ENSMUSG00000041907	protein_coding	Gpr45		chr1	42952872	43035456	82585	+	1	3	2	0	0	2	0	4	2	5	3	3	1	1	4	4	1
ENSMUSG00000070939	protein_coding	Tgfbrap1		chr1	43047200	43098637	51438	-	987	1391	1492	1443	1276	1078	1255	1086	989	1098	1087	1100	1369	925	1186	1127	1070
ENSMUSG00000100269	lncRNA	Gm28782		chr1	43056267	43057134	868	+	0	0	1	0	0	0	0	0	0	0	0	1	0	0	0	0	0
ENSMUSG00000041878	lncRNA	8430432A02Rik		chr1	43092588	43093835	1248	+	15	12	12	26	12	17	15	21	14	23	20	13	16	18	16	7	8
ENSMUSG00000010290	protein_coding	AI597479		chr1	43098710	43115947	17238	+	556	674	646	626	563	583	652	612	655	545	521	487	544	557	611	578	509
ENSMUSG00000008136	protein_coding	Fhl2		chr1	43123074	43196984	73911	-	77	76	74	67	71	71	70	51	54	60	82	60	85	65	55	78	50
ENSMUSG00000094497	processed_pseudogene	Gm8210		chr1	43189156	43189638	483	+	2	0	0	0	0	2	0	0	0	1	1	0	0	0	0	0	0
ENSMUSG00000099576	lncRNA	Gm29040		chr1	43250156	43302925	52770	-	0	0	0	0	2	0	1	0	1	0	1	1	0	0	0	1	0
ENSMUSG00000099694	processed_pseudogene	Gm29610	pseudo_consens	chr1	43270683	43271135	453	+	9	4	6	1	7	4	5	5	4	2	1	7	2	4	5	5	2
ENSMUSG00000066877	protein_coding	Nck2	overlapping_locus	chr1	43444579	43570515	125937	+	252	339	346	323	284	301	300	278	347	290	305	305	332	270	367	307	278
ENSMUSG00000103422	TEC	Gm37536	overlapping_locus	chr1	43488447	43490937	2491	+	0	0	0	0	1	0	0	0	0	0	0	0	1	0	2	0	0
ENSMUSG00000103945	TEC	Gm38228	overlapping_locus	chr1	43560273	43561565	1293	+	2	3	6	3	9	5	3	4	5	2	9	5	4	2	4	10	10
ENSMUSG00000026051	protein_coding	Ecrg4		chr1	43730602	43742578	11977	+	538	538	537	591	479	508	549	576	732	893	907	736	536	704	859	763	661
ENSMUSG00000100764	lncRNA	Gm29155		chr1	43741961	43743895	1935	-	5	3	4	6	6	0	5	7	1	6	2	7	4	1	4	3	6
ENSMUSG00000100635	lncRNA	Gm29157		chr1	43742915	43743526	612	+	3	5	6	6	3	4	6	7	9	9	13	12	6	3	7	7	11
ENSMUSG00000100480	lncRNA	Gm29156		chr1	43745784	43746282	499	-	10	16	10	17	12	9	10	11	10	14	9	11	15	11	11	13	10
ENSMUSG00000057363	protein_coding	Uxs1		chr1	43746966	43827800	80835	-	466	507	627	518	527	487	513	507	493	447	489	427	435	432	531	475	464
ENSMUSG00000090243	processed_pseudogene	Gm16103	pseudo_consens	chr1	43785910	43787188	1279	+	1	0	0	2	0	1	0	0	0	1	0	1	0	0	0	0	2
ENSMUSG00000100701	processed_pseudogene	Gm19587	pseudo_consens	chr1	43888051	43888595	545	+	3	8	10	7	5	3	6	5	2	3	4	8	7	6	4	5	3
ENSMUSG00000041763	protein_coding	Tpp2		chr1	43933647	44003000	69354	+	892	1079	1289	1300	1115	925	1051	819	887	850	899	943	1132	871	987	896	920
ENSMUSG00000047343	protein_coding	Mettl21c	overlapping_locus	chr1	44009408	44020034	10627	-	6	3	4	7	1	5	3	6	10	2	10	3	6	8	5	11	11
ENSMUSG00000090106	processed_pseudogene	Gm15838	overlapping_locus	chr1	44018470	44018649	180	-	0	0	0	1	0	0	0	0	0	0	0	0	0	0	0	0	0
ENSMUSG00000091844	protein_coding	Gm8251		chr1	44055872	44079746	23875	-	0	0	1	0	0	0	0	0	0	0	2	0	1	1	0	0	0
ENSMUSG00000026049	protein_coding	Tex30	overlapping_locus	chr1	44086613	44102441	15829	-	215	129	156	179	143	148	160	117	190	118	130	98	109	147	134	102	106
ENSMUSG00000026047	protein_coding	Poglut2	overlapping_locus	chr1	44106546	44118808	12263	-	202	237	253	301	182	165	181	190	203	189	196	194	211	251	228	236	216
ENSMUSG00000041684	protein_coding	Bivm		chr1	44118957	44144770	25814	+	411	367	429	468	338	336	348	376	484	373	391	346	360	390	436	388	371
ENSMUSG00000026048	protein_coding	Ercc5		chr1	44147744	44181260	33517	+	661	813	782	944	902	703	831	656	733	691	705	793	841	698	746	695	700
ENSMUSG00000046828	protein_coding	Mettl21e		chr1	44204070	44218961	14892	-	63	63	44	134	96	95	79	54	99	75	131	69	93	102	34	133	52
ENSMUSG00000089703	processed_pseudogene	Gm15833	pseudo_consens	chr1	44212162	44213118	957	+	1	0	1	0	1	1	1	1	1	2	0	3	2	1	2	1	0
ENSMUSG00000100966	processed_pseudogene	Gm5700	pseudo_consens	chr1	44330048	44331036	989	-	0	0	0	0	1	0	0	0	0	0	0	0	1	0	0	0	0
ENSMUSG00000100769	lncRNA	Gm28893		chr1	44392809	44394447	1639	+	0	0	0	0	0	0	0	0	0	1	0	0	0	0	0	0	0
ENSMUSG00000101567	processed_pseudogene	Txn-ps1	pseudo_consens	chr1	44463923	44464231	309	-	3	7	4	3	8	3	1	4	2	8	0	1	1	5	3	4	1
ENSMUSG00000056870	protein_coding	Gulp1	overlapping_locus	chr1	44551511	44796838	245328	+	185	192	182	286	210	196	303	272	359	255	243	237	322	300	360	272	216
ENSMUSG00000102319	TEC	Gm37626	overlapping_locus	chr1	44560885	44565447	4563	+	0	3	1	1	1	1	0	0	2	1	2	1	0	0	0	1	0
ENSMUSG00000089877	processed_pseudogene	Gm16102	overlapping_locus	chr1	44644279	44644698	420	+	0	1	1	1	0	0	0	1	0	0	0	1	1	0	1	2	0
ENSMUSG00000101701	lncRNA	4930521E06Rik		chr1	44739676	44744949	5274	-	0	0	0	0	0	0	0	0	0	1	0	0	0	0	0	0	0
ENSMUSG00000103071	TEC	Gm38110	overlapping_locus	chr1	44756942	44758492	1551	+	0	0	0	0	0	0	0	0	0	1	0	0	0	0	1	0	0
ENSMUSG00000100434	processed_pseudogene	Gm3489	pseudo_consens	chr1	44839171	44839698	528	+	0	1	0	0	0	0	0	0	0	0	0	0	0	0	0	0	0
ENSMUSG00000100013	processed_pseudogene	Gm19480	pseudo_consens	chr1	44873486	44874152	667	-	0	0	0	0	0	0	0	0	0	0	0	0	0	0	0	0	0
ENSMUSG00000101251	processed_pseudogene	Gm3496	pseudo_consens	chr1	44924149	44924893	745	-	0	0	0	0	0	0	0	0	0	0	0	0	0	0	0	0	0
ENSMUSG00000026043	protein_coding	Col3a1	ncRNA_host	chr1	45311538	45349706	38169	+	11412	15996	12953	18068	13601	8339	11287	12219	12088	8782	12512	9194	19422	17993	27060	13466	15606
ENSMUSG00000026042	protein_coding	Col5a2	overlapping_locus	chr1	45374321	45503282	128962	-	1169	1715	1696	2047	1345	1010	1444	1205	1241	1211	1480	1462	2375	1629	2304	1612	1851
ENSMUSG00000104476	TEC	Gm38211	overlapping_locus	chr1	45485836	45493052	7217	-	2	4	1	4	3	3	2	2	5	3	1	2	0	3	0	3	4
ENSMUSG00000100361	processed_pseudogene	Gm7063	pseudo_consens	chr1	45519774	45520754	981	-	0	0	0	0	0	1	0	0	0	0	1	0	1	0	1	1	1
ENSMUSG00000100894	processed_pseudogene	Gm8304	pseudo_consens	chr1	45602026	45602753	728	+	0	0	0	1	0	1	0	0	0	0	1	0	1	2	0	0	0
ENSMUSG00000065255	snoRNA	Gm23974		chr1	45746895	45747025	131	+	0	0	0	0	0	0	0	0	0	0	0	0	0	1	0	0	0
ENSMUSG00000100843	processed_pseudogene	Gm8307	pseudo_consens	chr1	45768337	45769486	1150	+	0	0	0	0	0	0	0	0	0	0	0	0	2	0	0	0	0
ENSMUSG00000025995	protein_coding	Wdr75		chr1	45795166	45823619	28454	+	767	830	1112	956	922	826	851	777	746	728	671	675	832	806	781	840	717
ENSMUSG00000099850	processed_pseudogene	Gm28906		chr1	45833800	45836788	2989	-	0	0	0	2	0	0	0	0	1	0	0	0	0	0	0	0	0
ENSMUSG00000084817	processed_pseudogene	Gm5526	pseudo_consens	chr1	45857332	45857754	423	-	0	0	0	2	3	2	3	0	1	2	1	7	2	1	3	2	0
ENSMUSG00000098549	protein_coding	Gm5269		chr1	45889525	45890273	749	-	3	1	2	2	2	1	2	2	2	1	3	3	4	4	1	2	0
ENSMUSG00000099381	processed_pseudogene	Gm18303	pseudo_consens	chr1	45905623	45906798	1176	+	4	1	0	1	0	2	0	2	3	1	2	3	5	1	1	3	1
ENSMUSG00000025993	protein_coding	Slc40a1		chr1	45908068	45926523	18456	-	1246	1140	1400	1299	976	757	892	869	1308	983	1330	843	1314	878	1443	937	822
ENSMUSG00000099946	processed_pseudogene	Gm9496	pseudo_consens	chr1	45971182	45976975	5794	+	0	0	0	0	0	0	0	0	0	0	0	0	0	0	0	0	0
ENSMUSG00000070896	processed_pseudogene	Rpl23a-ps1	pseudo_consens	chr1	45981548	45982012	465	+	0	0	0	4	0	0	0	0	1	0	0	1	1	0	0	0	0
ENSMUSG00000090682	processed_pseudogene	Gm3852		chr1	46011757	46012020	264	-	0	0	0	0	0	0	0	0	0	0	0	0	0	0	0	0	1
ENSMUSG00000099432	unprocessed_pseudogene	Gm18849		chr1	46056310	46058986	2677	+	0	0	0	0	0	0	0	0	1	0	0	0	0	0	0	0	0
ENSMUSG00000041144	protein_coding	Dnah7b		chr1	46066315	46373550	307236	+	6	4	0	4	3	2	5	4	5	4	5	6	4	6	9	1	7
ENSMUSG00000101262	processed_pseudogene	Gm8326	pseudo_consens	chr1	46414502	46416932	2431	+	4	5	3	3	8	0	3	4	5	4	5	4	5	2	5	4	3
ENSMUSG00000101337	protein_coding	Dnah7c		chr1	46425592	46807476	381885	+	1	2	1	1	3	2	1	2	2	2	2	2	1	0	2	3	1
ENSMUSG00000025986	protein_coding	Slc39a10	overlapping_locus	chr1	46807544	46892852	85309	-	609	854	1145	777	725	649	671	675	683	780	806	829	864	666	853	801	914
ENSMUSG00000100213	lncRNA	Gm28151	overlapping_locus	chr1	46849529	46850479	951	-	36	46	37	51	34	35	30	40	64	47	37	45	51	37	52	46	30
ENSMUSG00000103129	TEC	Gm37393	overlapping_locus	chr1	46877203	46881072	3870	-	3	0	0	0	0	1	0	1	1	0	0	3	5	2	0	0	1
ENSMUSG00000100160	processed_pseudogene	Gm28527	pseudo_consens	chr1	46896583	46896879	297	-	6	1	3	8	0	0	2	1	4	6	5	8	8	1	2	1	3
ENSMUSG00000081185	processed_pseudogene	Gm4852		chr1	47365644	47366372	729	-	1	0	0	0	0	0	2	0	0	0	0	0	0	2	1	0	0
ENSMUSG00000100033	processed_pseudogene	Gm8337	pseudo_consens	chr1	47657693	47659630	1938	+	6	4	7	5	5	2	3	4	2	3	2	5	3	1	6	2	5
ENSMUSG00000096973	processed_pseudogene	Gm5974	pseudo_consens	chr1	48313866	48314851	986	-	4	4	1	3	1	2	4	3	3	1	3	1	5	2	1	2	2
ENSMUSG00000101721	processed_pseudogene	Gm8354	pseudo_consens	chr1	48731579	48733090	1512	-	0	0	0	0	0	0	0	0	0	1	0	0	0	0	0	0	1
ENSMUSG00000097883	processed_pseudogene	Gm8357	pseudo_consens	chr1	48881713	48882723	1011	+	0	1	1	1	1	1	0	2	1	1	3	1	1	1	2	1	0
ENSMUSG00000099454	processed_pseudogene	Gm8367	pseudo_consens	chr1	49236252	49237244	993	+	0	0	0	0	0	0	0	0	0	1	0	0	0	0	0	0	0
ENSMUSG00000099577	processed_pseudogene	Gm3605	pseudo_consens	chr1	49498553	49498992	440	+	0	0	0	0	0	0	0	0	0	0	0	0	0	0	0	0	0
ENSMUSG00000099864	processed_pseudogene	Gm8391	pseudo_consens	chr1	50177566	50178291	726	-	0	0	0	0	0	0	0	0	0	0	0	0	0	0	0	0	0
ENSMUSG00000026109	protein_coding	Tmeff2	overlapping_locus	chr1	50900647	51187270	286624	+	31	53	25	63	52	25	50	43	51	53	30	34	76	43	64	67	45
ENSMUSG00000100671	lncRNA	Gm28322	overlapping_locus	chr1	50904444	50905918	1475	+	1	0	0	0	0	0	0	0	0	0	0	0	0	1	0	0	0
ENSMUSG00000092906	miRNA	Gm25736		chr1	51015313	51015413	101	+	0	0	0	0	0	0	0	0	0	0	1	0	0	0	0	0	0
ENSMUSG00000101242	lncRNA	Gm28319		chr1	51138281	51141222	2942	-	0	1	2	3	0	1	0	2	1	1	2	2	3	3	3	1	1
ENSMUSG00000099924	lncRNA	Gm28320	overlapping_locus	chr1	51148309	51150581	2273	+	2	3	4	1	2	2	1	1	0	3	1	1	2	1	1	5	5
ENSMUSG00000101799	lncRNA	9330175M20Rik	overlapping_locus	chr1	51218386	51333779	115394	-	0	0	0	0	0	0	0	0	0	0	0	0	1	1	0	0	1
ENSMUSG00000045954	protein_coding	Cavin2		chr1	51289126	51302960	13835	+	733	876	753	1033	865	802	979	842	917	933	759	745	1046	874	1003	966	965
ENSMUSG00000099741	processed_pseudogene	Gm5253	overlapping_locus	chr1	51317528	51318552	1025	-	0	0	0	0	0	0	0	0	0	0	1	0	0	0	0	0	0
ENSMUSG00000101702	lncRNA	1700072G22Rik		chr1	51457932	51458931	1000	-	0	1	0	0	0	5	0	0	0	0	0	0	0	0	0	0	0
ENSMUSG00000026107	protein_coding	Nabp1		chr1	51465862	51478425	12564	-	551	487	920	579	339	352	408	354	639	477	455	458	577	632	599	627	591
ENSMUSG00000099413	lncRNA	Gm17767	overlapping_locus	chr1	51507086	51596718	89633	-	9	12	14	15	10	8	16	10	8	6	5	9	8	5	13	8	13
ENSMUSG00000103424	TEC	Gm37535	overlapping_locus	chr1	51527005	51529369	2365	-	0	0	0	0	0	0	0	0	0	0	0	1	0	0	0	0	0
ENSMUSG00000101741	lncRNA	Gm28055		chr1	51696324	51746943	50620	-	0	1	0	1	0	1	0	1	0	0	0	0	0	0	0	1	0
ENSMUSG00000018417	protein_coding	Myo1b	overlapping_locus	chr1	51749765	51916071	166307	-	527	696	720	671	618	439	595	497	466	519	670	591	794	492	699	543	592
ENSMUSG00000101724	lncRNA	Gm29453	overlapping_locus	chr1	51847840	51849118	1279	-	0	0	0	0	0	0	0	0	0	0	0	1	0	0	0	0	0
ENSMUSG00000100313	lncRNA	Gm28323	overlapping_locus	chr1	51877110	51879608	2499	-	0	0	0	0	0	0	2	0	0	0	0	0	0	0	0	0	0
ENSMUSG00000100696	processed_pseudogene	Gm8419	pseudo_consens	chr1	51938254	51938665	412	-	1	0	1	1	0	1	0	1	1	0	0	0	0	1	0	0	1
ENSMUSG00000099135	snoRNA	Gm27607		chr1	51938974	51939095	122	-	0	0	0	0	0	0	0	1	0	0	0	0	0	0	0	0	0
ENSMUSG00000072324	processed_pseudogene	Gm8420	pseudo_consens	chr1	51940664	51941261	598	-	469	379	450	421	443	457	443	381	513	420	441	392	357	397	475	401	410
ENSMUSG00000062939	protein_coding	Stat4	overlapping_locus	chr1	51987148	52107189	120042	+	3	3	2	6	3	2	0	1	0	2	3	6	3	3	0	1	2
ENSMUSG00000101628	lncRNA	Gm28177	overlapping_locus	chr1	52077261	52156087	78827	+	1	1	0	3	0	0	0	0	0	0	0	0	0	0	0	0	0
ENSMUSG00000078291	processed_pseudogene	Gm3940	pseudo_consens	chr1	52090635	52091066	432	-	3	3	7	1	1	3	1	4	5	2	4	3	3	3	1	4	2
ENSMUSG00000109599	lncRNA	Gm31812		chr1	52108121	52113751	5631	-	11	7	7	6	8	10	11	8	8	10	7	3	5	14	18	9	13
ENSMUSG00000026104	protein_coding	Stat1	overlapping_locus	chr1	52119440	52161865	42426	+	441	755	657	592	232	265	290	273	299	432	629	535	460	338	342	320	336
ENSMUSG00000099569	unprocessed_pseudogene	Gm18301	pseudo_consens	chr1	52134443	52135330	888	-	0	0	0	1	0	0	0	0	0	0	0	0	0	0	0	0	1
ENSMUSG00000026103	protein_coding	Gls		chr1	52163448	52233232	69785	-	1572	1748	2176	2277	1666	1682	1822	1705	1854	1936	1868	1782	2129	1746	1826	1815	1716
ENSMUSG00000099648	processed_pseudogene	Gm5975		chr1	52287697	52289095	1399	-	0	0	0	0	0	0	0	0	0	2	0	0	1	0	0	0	0
ENSMUSG00000002881	protein_coding	Nab1		chr1	52457294	52500679	43386	-	2105	2358	2942	2826	2202	2147	2519	2191	2231	2261	2167	2077	2395	1937	2159	2257	1889
ENSMUSG00000097833	processed_pseudogene	Gm5976	pseudo_consens	chr1	52503234	52504229	996	-	7	7	11	12	6	7	6	5	12	2	5	5	8	8	7	6	5
ENSMUSG00000101501	processed_pseudogene	Rps27a-ps1	pseudo_consens	chr1	52522239	52522701	463	+	2	1	0	4	1	0	2	4	1	0	1	4	2	2	1	2	0
ENSMUSG00000100120	lncRNA	Gm553		chr1	52522902	52582679	59778	+	4	4	0	6	2	1	0	0	0	3	0	3	1	5	7	3	2
ENSMUSG00000099878	lncRNA	Gm28178		chr1	52570014	52580291	10278	-	3	1	4	2	0	2	2	6	2	1	1	2	3	1	2	3	4
ENSMUSG00000100007	processed_pseudogene	Gm5527	pseudo_consens	chr1	52584518	52585159	642	+	0	1	1	0	1	0	0	0	2	0	0	1	0	1	1	2	1
ENSMUSG00000043015	protein_coding	Nemp2		chr1	52630703	52651919	21217	+	236	256	316	291	237	191	268	259	270	196	239	246	247	323	290	297	248
ENSMUSG00000103630	TEC	Gm37242		chr1	52653808	52655892	2085	-	3	4	6	2	1	1	0	0	0	0	2	5	0	7	0	1	3
ENSMUSG00000041439	protein_coding	Mfsd6	overlapping_locus	chr1	52656286	52727462	71177	-	1808	2203	2904	2413	2027	1731	2106	1718	1860	1940	2038	1883	2455	1577	2382	1919	1843
ENSMUSG00000100302	lncRNA	Gm29670	overlapping_locus	chr1	52702272	52704762	2491	-	1	1	0	0	0	0	1	0	0	0	0	0	1	1	0	0	1
ENSMUSG00000100230	processed_pseudogene	Gm28650	pseudo_consens	chr1	52756719	52757129	411	+	0	5	2	4	1	2	0	1	2	3	0	2	5	1	2	3	2
ENSMUSG00000026102	protein_coding	Inpp1		chr1	52785427	52817688	32262	-	215	284	189	308	211	217	259	205	221	210	227	230	249	222	224	229	227
ENSMUSG00000041426	protein_coding	Hibch		chr1	52844929	52920986	76058	+	582	541	644	583	615	566	601	573	757	570	544	534	508	678	637	623	554
ENSMUSG00000043629	protein_coding	1700019D03Rik		chr1	52922324	53020179	97856	-	39	48	45	83	35	43	47	42	57	41	58	46	56	61	43	50	58
ENSMUSG00000026100	protein_coding	Mstn		chr1	53061640	53068079	6440	+	121	107	93	192	147	168	160	221	223	179	145	144	165	170	82	203	112
ENSMUSG00000060715	protein_coding	1700019A02Rik		chr1	53158577	53187636	29060	-	0	0	0	0	0	0	0	0	0	0	0	0	0	1	0	0	0
ENSMUSG00000026098	protein_coding	Pms1		chr1	53189187	53297018	107832	-	103	116	145	103	108	85	104	111	122	126	96	101	121	103	113	95	90
ENSMUSG00000100763	lncRNA	Gm28777		chr1	53196113	53197695	1583	+	0	0	1	0	0	0	0	1	3	0	0	0	0	2	1	0	1
ENSMUSG00000026097	protein_coding	Ormdl1	overlapping_locus	chr1	53297095	53310309	13215	+	313	237	247	322	258	248	299	227	333	285	304	234	249	285	308	262	236
ENSMUSG00000026096	protein_coding	Osgepl1	overlapping_locus	chr1	53313624	53326343	12720	+	186	209	188	293	192	208	200	183	223	208	218	190	179	211	210	195	182
ENSMUSG00000099913	protein_coding	Gm28551	overlapping_locus	chr1	53325507	53352667	27161	-	2	3	4	7	3	5	3	8	4	3	3	1	3	2	3	2	3
ENSMUSG00000101838	transcribed_unprocessed_pseudogene	Gm18800	overlapping_locus	chr1	53326206	53342186	15981	-	0	1	0	0	0	2	0	0	1	0	0	0	0	0	0	0	0
ENSMUSG00000026095	protein_coding	Asnsd1	overlapping_locus	chr1	53344617	53352752	8136	-	246	262	253	244	251	260	223	260	250	233	282	246	195	225	256	254	197
ENSMUSG00000096141	protein_coding	Dnah7a	ncRNA_host	chr1	53397006	53706784	309779	-	0	2	1	1	0	1	0	2	0	1	3	0	1	1	0	1	0
ENSMUSG00000026094	protein_coding	Stk17b		chr1	53755506	53785224	29719	-	784	890	1069	984	776	735	903	693	854	969	872	818	1052	955	988	835	795
ENSMUSG00000042807	protein_coding	Hecw2	overlapping_locus	chr1	53806876	54195168	388293	-	79	119	84	120	94	88	113	104	121	86	116	111	131	99	119	102	126
ENSMUSG00000102868	TEC	Gm37633	overlapping_locus	chr1	54152397	54155096	2700	-	0	0	0	0	0	0	0	0	0	0	0	0	0	0	0	0	0
ENSMUSG00000025983	protein_coding	Ccdc150		chr1	54250683	54368727	118045	+	8	4	11	26	16	14	13	15	8	9	15	14	7	10	12	16	10
ENSMUSG00000041303	protein_coding	Gtf3c3		chr1	54396004	54438971	42968	-	357	357	519	418	320	296	346	333	379	317	411	380	381	365	394	374	389
ENSMUSG00000109809	protein_coding	Gm34066		chr1	54443404	54456763	13360	-	0	0	0	0	0	0	1	0	0	0	0	0	1	0	0	0	0
ENSMUSG00000073678	protein_coding	Pgap1	overlapping_locus	chr1	54472994	54557684	84691	-	779	972	1203	1035	701	765	818	813	814	844	853	875	1127	777	986	850	886
ENSMUSG00000104136	TEC	Gm36955	overlapping_locus	chr1	54518610	54520270	1661	-	0	1	0	0	3	0	1	0	1	1	0	1	1	0	0	0	1
ENSMUSG00000101130	processed_pseudogene	Gm19637	pseudo_consens	chr1	54566703	54567281	579	+	0	1	0	0	0	0	0	1	1	0	1	0	0	0	0	0	0
ENSMUSG00000052331	protein_coding	Ankrd44	overlapping_locus	chr1	54645340	54926387	281048	-	368	497	518	637	479	383	478	395	429	452	493	587	609	404	588	496	460
ENSMUSG00000101674	lncRNA	4930444A19Rik		chr1	54681729	54767524	85796	+	0	0	0	0	0	0	1	0	0	0	0	0	0	0	1	0	0
ENSMUSG00000102503	TEC	Gm37370	overlapping_locus	chr1	54737166	54738575	1410	-	3	1	3	6	2	4	2	1	1	1	3	0	1	3	5	0	2
ENSMUSG00000102642	TEC	A130048G24Rik	overlapping_locus	chr1	54913845	54916594	2750	-	0	0	0	0	0	0	0	0	0	0	1	1	0	0	0	0	0
ENSMUSG00000025982	protein_coding	Sf3b1		chr1	54985169	55027481	42313	-	5335	6052	6410	7775	5823	5277	6602	5191	5504	5271	5037	5826	6411	6220	5593	6193	5573
ENSMUSG00000103030	TEC	E330011M16Rik		chr1	55051319	55053112	1794	-	3	11	8	8	5	13	12	7	12	7	10	5	4	5	6	8	6
ENSMUSG00000025981	protein_coding	Coq10b	overlapping_locus	chr1	55052770	55072702	19933	+	322	319	398	469	364	378	419	316	354	482	433	372	454	382	449	430	379
ENSMUSG00000101122	processed_pseudogene	Gm17971	overlapping_locus	chr1	55066264	55067069	806	+	10	6	11	9	4	12	9	6	8	12	10	7	15	11	7	15	13
ENSMUSG00000025980	protein_coding	Hspd1		chr1	55077835	55088243	10409	-	913	1181	1590	1052	1198	1109	1114	1125	952	1040	1000	1024	1160	1043	1118	1116	1091
ENSMUSG00000073676	protein_coding	Hspe1		chr1	55088132	55091307	3176	+	251	208	261	216	234	247	270	253	297	261	234	207	201	268	294	227	186
ENSMUSG00000100736	processed_pseudogene	Gm5147	pseudo_consens	chr1	55120080	55120873	794	-	1	5	1	3	1	2	8	1	1	2	3	4	2	2	2	2	3
ENSMUSG00000089670	processed_pseudogene	Gm16581	pseudo_consens	chr1	55127297	55128287	991	+	0	1	2	4	1	0	1	1	2	4	1	1	2	2	1	3	2
ENSMUSG00000025979	protein_coding	Mob4		chr1	55131231	55154899	23669	+	1639	1489	1834	1787	1550	1538	1841	1523	2038	1581	1832	1437	1649	1659	1856	1583	1397
ENSMUSG00000061863	processed_pseudogene	Gm6822		chr1	55160747	55161053	307	-	0	1	0	0	1	0	0	1	2	1	3	2	1	2	6	1	2
ENSMUSG00000025978	protein_coding	Rftn2		chr1	55170159	55226782	56624	-	349	473	338	389	423	416	465	402	415	527	599	469	510	421	533	481	560
ENSMUSG00000097649	lncRNA	Gm10561		chr1	55226251	55235622	9372	+	31	37	26	46	37	36	31	34	39	40	56	41	49	51	49	48	43
ENSMUSG00000046994	protein_coding	Mars2		chr1	55237177	55248470	11294	+	193	182	249	250	166	188	186	184	221	189	186	204	225	223	224	188	175
ENSMUSG00000025977	protein_coding	Boll		chr1	55248658	55363469	114812	-	0	0	0	1	0	0	1	1	0	1	1	1	0	3	0	0	0
ENSMUSG00000100215	processed_pseudogene	Gm8292	pseudo_consens	chr1	55335401	55335796	396	+	18	12	11	12	14	24	21	16	20	20	17	13	14	28	25	13	10
ENSMUSG00000101945	processed_pseudogene	Gm29138	pseudo_consens	chr1	55370016	55370363	348	-	0	0	0	0	0	2	0	1	0	1	3	0	0	1	0	0	1
ENSMUSG00000038349	protein_coding	Plcl1	overlapping_locus	chr1	55405921	55754285	348365	+	65	79	65	100	80	89	84	74	82	55	80	102	84	67	67	82	65
ENSMUSG00000102145	TEC	Gm38056	overlapping_locus	chr1	55440904	55445930	5027	+	0	3	1	1	0	0	2	0	1	0	0	0	1	0	1	0	0
ENSMUSG00000099950	lncRNA	9130227L01Rik		chr1	55931241	55972328	41088	+	0	0	0	0	0	0	0	0	0	0	0	0	0	0	0	0	0
ENSMUSG00000038331	protein_coding	Satb2	overlapping_locus	chr1	56793981	56978650	184670	-	22	28	30	25	20	16	29	19	29	33	27	27	50	23	53	44	21
ENSMUSG00000087022	lncRNA	9130024F11Rik	overlapping_locus	chr1	56971412	57050084	78673	+	15	12	13	14	13	9	16	16	12	6	11	7	15	5	8	8	13
ENSMUSG00000101129	processed_pseudogene	Gm5254	pseudo_consens	chr1	57291425	57292401	977	-	0	1	0	0	0	0	2	0	0	0	1	0	0	0	0	0	0
ENSMUSG00000097519	lncRNA	4930558J18Rik		chr1	57359222	57377544	18323	-	3	4	6	1	4	4	8	4	7	9	4	1	3	3	3	5	3
ENSMUSG00000038323	protein_coding	1700066M21Rik		chr1	57377620	57385423	7804	+	135	128	146	170	140	127	136	136	169	116	132	115	121	122	137	128	128
ENSMUSG00000048495	protein_coding	Tyw5		chr1	57388237	57407101	18865	-	135	137	137	187	106	145	159	143	201	116	138	117	129	169	137	121	116
ENSMUSG00000025971	protein_coding	Maip1		chr1	57406328	57417953	11626	+	330	284	312	363	404	374	385	387	360	294	318	265	292	341	336	312	266
ENSMUSG00000101826	processed_pseudogene	Gm8581	pseudo_consens	chr1	57518523	57519412	890	-	0	0	0	1	1	1	0	0	0	0	0	0	0	1	0	0	0
ENSMUSG00000038305	protein_coding	Spats2l		chr1	57774162	57948394	174233	+	221	334	311	317	204	73	321	153	249	289	292	296	272	202	81	205	266
ENSMUSG00000091283	lncRNA	Gm17234		chr1	57909835	57917111	7277	-	0	0	0	0	0	0	0	0	0	0	1	0	0	0	1	0	0
ENSMUSG00000054770	protein_coding	Kctd18		chr1	57955101	58018956	63856	-	312	433	409	569	408	376	445	393	380	333	334	401	490	391	447	429	350
ENSMUSG00000026039	protein_coding	Sgo2a		chr1	57995971	58025899	29929	+	69	65	83	94	65	51	54	40	57	36	42	45	66	61	78	39	39
ENSMUSG00000063558	protein_coding	Aox1		chr1	58029931	58106413	76483	+	300	450	306	816	370	342	498	392	391	409	301	433	569	444	391	424	409
ENSMUSG00000064294	protein_coding	Aox3		chr1	58113130	58200698	87569	+	233	230	221	227	281	201	277	211	242	181	195	175	156	191	154	177	218
ENSMUSG00000038242	protein_coding	Aox4		chr1	58210397	58268597	58201	+	8035	9077	9476	6882	8826	6851	8889	6857	8183	5546	6557	6395	6292	8714	7905	8568	8580
ENSMUSG00000089822	lncRNA	Gm15759		chr1	58254117	58315656	61540	-	41	40	50	51	36	16	49	29	32	18	20	41	35	54	19	53	42
ENSMUSG00000079554	protein_coding	Aox2		chr1	58278326	58380259	101934	+	62	69	72	87	84	67	87	70	67	71	67	50	64	74	71	81	100
ENSMUSG00000103839	TEC	Gm37607		chr1	58383512	58386134	2623	-	11	11	24	29	12	5	12	12	19	17	14	31	24	18	12	20	18
ENSMUSG00000051223	protein_coding	Bzw1		chr1	58392898	58407353	14456	+	5411	5107	6334	5812	5576	5195	5739	4940	5368	5218	4980	4386	4956	4881	5007	4885	4574
ENSMUSG00000026034	protein_coding	Clk1		chr1	58410189	58424066	13878	-	2806	2856	2626	5116	2433	2563	3275	2478	3601	2503	2785	3336	3530	3379	2912	2979	2625
ENSMUSG00000026035	protein_coding	Ppil3		chr1	58430994	58445486	14493	-	331	322	373	323	298	267	284	318	332	341	364	307	304	342	383	346	286
ENSMUSG00000026036	protein_coding	Nif3l1		chr1	58445151	58481816	36666	+	485	472	630	494	486	449	522	480	446	423	488	406	470	439	492	478	397
ENSMUSG00000026037	protein_coding	Orc2	ncRNA_host	chr1	58462771	58505109	42339	-	499	568	699	661	619	547	587	527	572	535	501	439	551	538	484	492	459
ENSMUSG00000094245	snRNA	Gm23966		chr1	58466515	58466621	107	-	3	4	0	1	1	0	0	4	2	0	1	1	1	0	2	0	0
ENSMUSG00000085054	lncRNA	Gm15834		chr1	58505148	58523230	18083	+	11	11	8	16	4	4	6	9	12	6	8	12	17	15	13	3	14
ENSMUSG00000038174	protein_coding	Fam126b		chr1	58522806	58586323	63518	-	509	641	651	745	620	594	732	575	675	496	517	574	659	522	665	583	559
ENSMUSG00000026032	protein_coding	Ndufb3		chr1	58586384	58595964	9581	+	816	707	797	846	842	820	865	775	1018	849	918	783	649	926	864	953	732
ENSMUSG00000059647	processed_pseudogene	Cbx3-ps7		chr1	58646688	58647239	552	+	0	0	0	0	0	0	0	0	0	1	0	0	0	0	0	0	0
ENSMUSG00000047528	protein_coding	Flacc1		chr1	58646903	58695989	49087	-	48	40	38	61	47	33	32	40	44	29	48	24	29	45	37	35	39
ENSMUSG00000102059	transcribed_unprocessed_pseudogene	Gm20257		chr1	58652641	58655831	3191	+	75	77	61	130	51	73	62	67	75	73	95	63	81	76	70	69	53
ENSMUSG00000026031	protein_coding	Cflar		chr1	58711508	58758884	47377	+	945	1330	1228	1428	955	977	1160	970	1162	1081	1226	1206	1436	1020	1315	1130	1007
ENSMUSG00000100236	processed_pseudogene	Gm3841	pseudo_consens	chr1	58785209	58785659	451	+	0	1	0	0	0	0	2	0	0	0	0	0	0	1	0	0	1
ENSMUSG00000026029	protein_coding	Casp8	overlapping_locus	chr1	58795374	58847503	52130	+	329	439	586	543	385	326	392	354	363	417	416	399	487	422	472	447	391
ENSMUSG00000102719	TEC	Gm37760	overlapping_locus	chr1	58797783	58801623	3841	+	5	4	4	16	5	8	5	2	2	3	6	5	6	8	4	7	7
ENSMUSG00000099719	unprocessed_pseudogene	Gm28802		chr1	58850085	58892792	42708	-	1	0	1	2	2	1	1	1	1	1	1	0	1	0	0	0	1
ENSMUSG00000026028	protein_coding	Trak2		chr1	58900449	58973430	72982	-	1192	1420	1418	1669	1337	1227	1388	1032	1292	1163	1239	1240	1528	1152	1332	1356	1059
ENSMUSG00000026027	protein_coding	Stradb		chr1	58973522	58995715	22194	+	310	414	429	517	403	429	373	389	375	352	405	384	433	395	334	373	357
ENSMUSG00000047383	lncRNA	AC169382.1		chr1	58997123	59003539	6417	-	0	0	0	1	0	0	0	0	0	0	0	0	0	0	3	0	0
ENSMUSG00000099752	lncRNA	Gm29018		chr1	59014224	59059481	45258	+	0	0	0	0	2	0	2	1	2	0	0	0	0	1	1	2	4
ENSMUSG00000072295	protein_coding	C2cd6		chr1	58997116	59094900	97785	-	0	0	1	2	2	0	0	2	0	2	2	0	0	0	1	0	0
ENSMUSG00000038079	protein_coding	Tmem237		chr1	59100590	59120408	19819	-	183	192	241	226	185	178	216	195	177	152	217	185	236	234	219	189	182
ENSMUSG00000097573	lncRNA	G730003C15Rik		chr1	59119833	59122141	2309	+	46	58	54	60	77	44	51	57	59	64	49	38	53	39	55	43	48
ENSMUSG00000079550	protein_coding	Mpp4	overlapping_locus	chr1	59120935	59163389	42455	-	5	2	6	7	3	8	6	6	4	3	6	5	5	6	5	4	5
ENSMUSG00000101586	lncRNA	Gm29017	overlapping_locus	chr1	59151047	59169320	18274	+	8	2	2	8	5	9	4	6	4	1	5	6	3	2	3	6	9
ENSMUSG00000099563	processed_pseudogene	Gm19125	overlapping_locus	chr1	59155607	59156989	1383	+	0	0	0	0	0	0	0	0	0	0	0	0	0	0	0	0	0
ENSMUSG00000026024	protein_coding	Als2	overlapping_locus	chr1	59162926	59237231	74306	-	488	527	555	726	450	383	429	402	476	385	378	526	516	471	491	483	452
ENSMUSG00000026023	protein_coding	Cdk15		chr1	59256906	59352993	96088	+	33	28	18	34	13	21	33	19	24	26	35	25	32	25	54	19	36
ENSMUSG00000099922	lncRNA	Gm29016		chr1	59378930	59392299	13370	+	1	2	0	0	2	0	0	0	2	1	0	0	0	2	1	0	0
ENSMUSG00000104502	TEC	Gm37737		chr1	59447865	59449502	1638	-	1	0	1	1	2	2	1	2	1	0	0	1	0	2	2	0	1
ENSMUSG00000041075	protein_coding	Fzd7		chr1	59482424	59486955	4532	+	1365	1865	1926	1650	1561	1540	1835	1651	1404	1574	1627	1747	1801	1587	1886	1705	1552
ENSMUSG00000097819	lncRNA	Gm26813		chr1	59488480	59492605	4126	-	112	132	116	148	143	154	151	136	106	137	142	112	151	95	130	104	95
ENSMUSG00000047361	protein_coding	Gm973	ncRNA_host	chr1	59516264	59636417	120154	+	351	373	308	459	364	356	332	336	306	474	368	467	389	276	474	302	306
ENSMUSG00000099811	lncRNA	Gm28411	overlapping_locus	chr1	59532991	59549521	16531	-	0	0	2	1	0	1	0	1	2	1	0	0	0	0	0	0	1
ENSMUSG00000026021	protein_coding	Sumo1	overlapping_locus	chr1	59586558	59670834	84277	-	730	558	602	645	595	597	640	611	841	646	668	540	493	690	689	667	607
ENSMUSG00000103821	TEC	D430013B06Rik	overlapping_locus	chr1	59646200	59648071	1872	-	11	14	17	20	22	9	12	13	14	14	7	13	18	8	13	12	24
ENSMUSG00000101400	processed_pseudogene	Gm29596	pseudo_consens	chr1	59673241	59673625	385	+	0	0	1	0	0	0	0	0	0	0	0	0	0	1	0	0	0
ENSMUSG00000026020	protein_coding	Nop58	ncRNA_host	chr1	59684971	59719044	34074	+	1687	1800	2881	1945	1959	1764	2011	1705	1494	1675	1509	1528	1736	1657	1785	1759	1620
ENSMUSG00000077345	snoRNA	Snord70		chr1	59691934	59692020	87	+	1	1	1	0	1	0	0	0	1	1	0	1	3	0	1	1	1
ENSMUSG00000089512	snoRNA	Gm26287		chr1	59704258	59704338	81	+	0	0	0	1	3	2	0	0	0	0	1	0	3	1	2	1	1
ENSMUSG00000067336	protein_coding	Bmpr2	overlapping_locus	chr1	59763400	59879014	115615	+	2557	3922	4360	4215	3322	3153	3724	3188	3060	3315	3332	3651	4632	2507	3491	3197	3046
ENSMUSG00000104052	TEC	Gm38125	overlapping_locus	chr1	59801263	59804700	3438	+	0	0	0	1	1	2	0	0	0	3	0	0	2	0	0	0	0
ENSMUSG00000041040	protein_coding	Fam117b	overlapping_locus	chr1	59913006	59985346	72341	+	865	1161	1246	1197	1136	970	1123	830	797	924	971	904	1136	774	1084	851	843
ENSMUSG00000103696	TEC	Gm37531	overlapping_locus	chr1	59929688	59935102	5415	+	0	2	1	0	1	1	1	0	1	0	0	1	2	0	1	0	2
ENSMUSG00000100901	processed_pseudogene	Gm18829	overlapping_locus	chr1	59950403	59952464	2062	-	0	0	0	0	0	0	0	0	0	0	0	1	0	1	0	0	0
ENSMUSG00000026018	protein_coding	Ica1l		chr1	59982490	60043184	60695	-	18	15	10	16	13	17	7	8	9	14	16	14	14	10	9	9	12
ENSMUSG00000026019	protein_coding	Wdr12		chr1	60069785	60098645	28861	-	402	430	638	437	392	374	397	409	372	352	326	360	353	380	354	384	345
ENSMUSG00000026017	protein_coding	Carf	overlapping_locus	chr1	60098247	60153953	55707	+	219	233	260	334	242	218	271	231	262	199	227	268	256	260	286	201	219
ENSMUSG00000082609	processed_pseudogene	Gm15464	overlapping_locus	chr1	60117255	60117685	431	+	0	1	1	0	0	2	2	0	1	0	2	0	1	1	1	1	0
ENSMUSG00000073664	protein_coding	Nbeal1		chr1	60180599	60338328	157730	+	627	962	911	1092	683	747	888	751	827	862	875	1020	1115	706	910	902	779
ENSMUSG00000049439	protein_coding	Cyp20a1	overlapping_locus	chr1	60343323	60388060	44738	+	273	305	315	335	291	277	350	274	350	288	294	274	306	316	337	327	323
ENSMUSG00000103822	TEC	6030460B20Rik	overlapping_locus	chr1	60353119	60354176	1058	+	1	1	2	2	1	3	0	2	0	0	0	0	3	2	1	1	1
ENSMUSG00000026782	protein_coding	Abi2		chr1	60409619	60481158	71540	+	461	582	569	691	666	487	574	479	526	471	514	453	653	480	548	486	453
ENSMUSG00000026014	protein_coding	Raph1	overlapping_locus	chr1	60482292	60567104	84813	-	965	1468	1839	1698	1158	960	1193	1103	1148	1295	1408	1487	1876	1007	1315	1360	1144
ENSMUSG00000081562	processed_pseudogene	Gm11575	overlapping_locus	chr1	60522839	60523066	228	-	2	1	1	2	1	1	0	0	1	1	0	0	0	1	1	2	2
ENSMUSG00000084400	processed_pseudogene	Gm11576	pseudo_consens	chr1	60537020	60537436	417	+	0	0	2	0	0	0	0	0	0	0	0	0	0	1	2	0	0
ENSMUSG00000103215	TEC	Gm38388		chr1	60594807	60596236	1430	-	1	0	0	0	0	0	0	0	0	0	0	0	0	0	0	1	0
ENSMUSG00000084151	processed_pseudogene	Gm11577	pseudo_consens	chr1	60700872	60701937	1066	+	0	0	0	0	0	0	0	0	1	0	0	0	0	0	0	0	0
ENSMUSG00000101188	processed_pseudogene	Eif4a-ps4		chr1	60703932	60705149	1218	+	45	46	59	46	58	30	44	43	65	49	50	30	53	35	39	58	38
ENSMUSG00000026012	protein_coding	Cd28		chr1	60716800	60773359	56560	+	72	98	166	177	65	83	95	101	109	193	251	171	144	108	133	155	111
ENSMUSG00000086795	lncRNA	Gm11579	overlapping_locus	chr1	60776665	60781834	5170	-	0	0	0	0	0	0	0	0	0	0	0	0	0	0	0	0	0
ENSMUSG00000085965	lncRNA	2310016D23Rik	overlapping_locus	chr1	60778843	60803790	24948	+	2	2	1	3	5	2	2	2	5	1	4	2	0	1	0	1	1
ENSMUSG00000104069	TEC	Gm37198	overlapping_locus	chr1	60779352	60781461	2110	+	1	1	1	1	0	0	0	0	1	0	0	0	1	1	0	1	0
ENSMUSG00000083118	processed_pseudogene	Gm11609	overlapping_locus	chr1	60792490	60793832	1343	+	0	0	0	0	0	0	0	0	0	0	2	0	0	0	0	0	0
ENSMUSG00000083355	processed_pseudogene	Gm11581	pseudo_consens	chr1	60809116	60809942	827	+	18	46	34	35	20	28	22	21	52	35	50	35	54	39	34	24	13
ENSMUSG00000102549	TEC	Gm38137		chr1	60880338	60881738	1401	+	2	1	3	5	5	1	4	3	8	2	5	2	6	0	4	3	6
ENSMUSG00000026011	protein_coding	Ctla4	overlapping_locus	chr1	60887000	60915832	28833	+	5	6	3	12	2	1	5	3	2	3	4	5	6	6	3	5	1
ENSMUSG00000081382	processed_pseudogene	Rpl18-ps1	overlapping_locus	chr1	60900898	60901422	525	+	54	49	52	59	55	45	63	52	47	42	57	35	51	47	37	40	30
ENSMUSG00000080800	processed_pseudogene	Gm11582	pseudo_consens	chr1	60948230	60948465	236	-	0	0	0	0	0	0	0	2	0	0	1	0	0	0	0	0	1
ENSMUSG00000026009	protein_coding	Icos	overlapping_locus	chr1	60977927	61000320	22394	+	16	20	6	26	6	7	7	6	8	4	17	13	12	15	8	14	9
ENSMUSG00000102561	TEC	Gm37039	overlapping_locus	chr1	60989479	60991963	2485	+	0	1	1	0	0	0	0	0	0	0	0	1	0	0	0	0	0
ENSMUSG00000082804	processed_pseudogene	Rpl17-ps1	pseudo_consens	chr1	61075674	61076225	552	+	5	2	5	2	4	4	6	9	10	4	9	1	3	8	6	5	3
ENSMUSG00000052062	protein_coding	Pard3b	overlapping_locus	chr1	61638824	62642284	1003461	+	224	374	304	375	366	339	404	318	297	316	290	303	349	273	381	308	296
ENSMUSG00000103656	TEC	Gm37205	overlapping_locus	chr1	61654423	61657158	2736	+	0	0	0	0	0	0	1	0	0	0	0	0	0	0	0	0	0
ENSMUSG00000104402	TEC	Gm38012	overlapping_locus	chr1	61677249	61680277	3029	+	0	0	0	0	0	0	0	0	0	1	0	0	0	0	0	0	0
ENSMUSG00000085842	lncRNA	Pard3bos1	overlapping_locus	chr1	61767415	61851540	84126	-	0	0	0	0	0	0	1	0	0	0	0	0	1	0	0	0	1
ENSMUSG00000103002	TEC	Gm38075	overlapping_locus	chr1	61805221	61806140	920	+	0	0	0	0	0	0	0	0	0	0	0	0	0	0	0	0	1
ENSMUSG00000101509	processed_pseudogene	Gm29641		chr1	62095081	62095339	259	-	0	0	0	0	0	0	0	0	0	0	0	0	1	0	0	0	0
ENSMUSG00000085019	lncRNA	Pard3bos2		chr1	62131195	62136109	4915	-	0	0	0	0	0	0	1	0	0	0	0	0	0	0	1	1	0
ENSMUSG00000085400	lncRNA	Pard3bos3		chr1	62456725	62499261	42537	-	1	0	0	1	0	0	1	0	0	0	1	0	2	0	0	0	1
ENSMUSG00000100750	lncRNA	Gm29084		chr1	62534491	62535942	1452	-	0	1	0	1	0	0	0	0	0	0	0	0	0	0	0	0	0
ENSMUSG00000081950	processed_pseudogene	Gm11600	pseudo_consens	chr1	62656695	62657788	1094	-	0	1	0	1	0	0	0	1	0	0	0	0	0	0	1	0	0
ENSMUSG00000084333	processed_pseudogene	Gm11599	pseudo_consens	chr1	62660839	62661716	878	+	4	4	3	2	4	1	3	2	5	6	1	4	3	2	4	2	0
ENSMUSG00000025969	protein_coding	Nrp2	overlapping_locus	chr1	62703285	62818695	115411	+	1089	1696	1674	1386	1603	1174	1431	1226	1146	1362	1343	1417	1853	1205	1600	1533	1676
ENSMUSG00000100811	lncRNA	Gm29083		chr1	62714723	62718073	3351	-	0	4	0	0	1	0	1	0	0	1	2	2	1	2	0	0	0
ENSMUSG00000103032	TEC	Gm37121	overlapping_locus	chr1	62809302	62811857	2556	+	8	18	13	29	18	17	19	9	20	11	13	16	13	15	19	22	25
ENSMUSG00000100426	lncRNA	Gm4208		chr1	62821355	62832370	11016	-	66	42	41	57	72	62	61	47	96	59	49	70	48	98	110	88	85
ENSMUSG00000040865	protein_coding	Ino80d		chr1	62958418	63114667	156250	-	797	1238	1282	1324	940	819	1094	819	877	879	944	1102	1207	850	1039	1092	991
ENSMUSG00000081617	processed_pseudogene	Rps13-ps7	pseudo_consens	chr1	63038214	63038581	368	+	0	0	0	0	0	0	0	0	0	1	0	0	0	0	0	0	1
ENSMUSG00000081429	processed_pseudogene	Rps27-ps1	pseudo_consens	chr1	63073774	63074019	246	+	3	1	2	0	3	3	2	3	2	0	2	0	2	4	1	2	4
ENSMUSG00000084799	lncRNA	Ino80dos	overlapping_locus	chr1	63113078	63158290	45213	+	39	54	41	83	56	53	51	41	50	43	45	53	72	57	41	48	50
ENSMUSG00000101599	lncRNA	Gm20342	overlapping_locus	chr1	63117118	63126837	9720	+	102	113	84	152	59	74	77	86	100	70	83	101	119	89	98	95	82
ENSMUSG00000025968	protein_coding	Ndufs1		chr1	63143596	63176833	33238	-	1482	1975	2245	2293	2214	1991	2117	2095	1959	1968	1915	1925	2277	1907	1950	2259	1954
ENSMUSG00000077884	miRNA	Gm24557		chr1	63161855	63161943	89	+	0	0	0	1	0	0	0	0	0	0	0	1	0	0	0	1	0
ENSMUSG00000025967	protein_coding	Eef1b2	ncRNA_host	chr1	63176825	63180486	3662	+	12198	9730	10825	10314	10867	11562	12039	10779	14847	11378	11192	8875	8979	10996	12697	11074	9688
ENSMUSG00000064612	snoRNA	Gm26457		chr1	63178677	63178754	78	+	5	6	4	7	6	5	2	5	10	1	2	3	1	5	4	3	7
ENSMUSG00000064602	snoRNA	Snora41		chr1	63179004	63179135	132	+	7	4	13	6	4	6	9	7	14	7	8	4	15	11	10	8	5
ENSMUSG00000046856	protein_coding	Gpr1		chr1	63182691	63214543	31853	-	18	11	10	20	10	5	25	19	28	18	9	17	21	16	22	13	24
ENSMUSG00000102536	TEC	1700039I01Rik		chr1	63248021	63248499	479	-	0	0	0	0	0	0	0	0	0	0	0	0	1	0	0	0	0
ENSMUSG00000027520	protein_coding	Zdbf2		chr1	63273265	63314576	41312	+	21	50	24	48	47	38	32	41	37	34	38	42	47	23	22	46	39
ENSMUSG00000081643	processed_pseudogene	Gm11605	pseudo_consens	chr1	63364720	63365365	646	-	3	1	3	4	3	2	2	1	0	3	2	4	7	1	6	1	2
ENSMUSG00000025964	protein_coding	Adam23		chr1	63445891	63596276	150386	+	169	312	223	329	228	214	319	207	208	203	243	339	338	228	316	231	259
ENSMUSG00000087823	snRNA	Gm22281		chr1	63575488	63575590	103	-	0	0	0	0	1	0	4	0	1	0	0	1	1	0	1	0	0
ENSMUSG00000115378	protein_coding	Gm39653		chr1	63615968	63620819	4852	+	0	0	0	0	0	0	0	0	0	0	1	0	0	0	0	0	0
ENSMUSG00000069085	protein_coding	Dytn		chr1	63622851	63686927	64077	-	0	0	0	0	0	0	0	0	0	0	0	0	0	0	0	0	0
ENSMUSG00000083066	processed_pseudogene	Gm12748		chr1	63671468	63671971	504	+	0	0	0	0	0	1	0	0	0	0	0	0	0	0	0	0	0
ENSMUSG00000025963	protein_coding	Mdh1b		chr1	63698819	63730318	31500	-	0	0	0	0	2	0	0	0	2	0	0	0	0	0	1	0	1
ENSMUSG00000025962	protein_coding	Fastkd2		chr1	63730614	63754655	24042	+	312	330	498	414	340	370	420	389	466	355	311	304	316	377	335	377	295
ENSMUSG00000025961	protein_coding	4933402D24Rik		chr1	63754907	63769267	14361	-	0	1	1	2	1	1	2	1	2	0	0	2	0	2	1	3	4
ENSMUSG00000080817	processed_pseudogene	Gm13751	pseudo_consens	chr1	63844827	63845578	752	-	0	0	0	0	0	0	0	1	0	0	0	1	1	0	0	0	0
ENSMUSG00000082373	unitary_pseudogene	Gm13754		chr1	63917848	63935932	18085	+	0	1	0	0	0	0	0	0	0	1	0	0	0	0	0	0	0
ENSMUSG00000044689	lncRNA	Gm13749		chr1	63964727	63968999	4273	+	0	4	3	2	5	5	0	4	7	3	4	6	4	3	7	3	2
ENSMUSG00000025959	protein_coding	Klf7	ncRNA_host	chr1	64029447	64122282	92836	-	194	247	302	276	206	162	224	179	198	249	249	280	316	183	248	316	275
ENSMUSG00000086836	lncRNA	Gm13748		chr1	64078654	64090782	12129	+	0	0	0	0	0	0	0	0	0	0	0	1	0	0	0	1	0
ENSMUSG00000086721	processed_pseudogene	Gm13750	pseudo_consens	chr1	64150201	64150665	465	+	3	1	1	1	0	1	3	1	1	1	0	3	0	1	1	1	3
ENSMUSG00000101895	lncRNA	Gm28981		chr1	64185991	64303043	117053	-	0	0	0	0	0	0	0	0	0	0	0	0	0	1	0	0	0
ENSMUSG00000099658	processed_pseudogene	Gm28980	pseudo_consens	chr1	64454359	64454577	219	-	0	0	2	1	1	1	0	0	0	0	0	1	1	0	0	0	0
ENSMUSG00000025958	protein_coding	Creb1		chr1	64532645	64604548	71904	+	932	1171	1355	1361	1075	995	1134	1042	1031	1040	1067	1103	1172	1104	1286	1148	1034
ENSMUSG00000025956	protein_coding	Mettl21a		chr1	64606473	64617242	10770	-	360	293	325	343	263	305	295	312	350	301	384	333	315	341	352	281	289
ENSMUSG00000101832	lncRNA	Gm28982		chr1	64617784	64626033	8250	+	3	3	6	2	1	1	0	3	3	5	1	3	2	4	2	1	1
ENSMUSG00000100437	lncRNA	Gm29152		chr1	64649935	64652756	2822	+	2	2	1	0	0	1	0	0	1	1	1	3	2	0	1	0	0
ENSMUSG00000087213	lncRNA	2810408I11Rik		chr1	64679871	64690659	10789	-	14	15	31	12	14	18	11	10	9	14	7	8	7	19	8	9	12
ENSMUSG00000070871	protein_coding	Ccnyl1		chr1	64690455	64725644	35190	+	175	177	201	208	173	164	164	162	127	146	165	160	204	185	161	157	166
ENSMUSG00000045005	protein_coding	Fzd5		chr1	64730558	64737751	7194	-	287	386	319	338	349	291	329	291	250	289	349	379	409	237	301	304	253
ENSMUSG00000102140	TEC	Gm38058		chr1	64736240	64740607	4368	+	0	0	0	3	0	0	1	2	0	3	3	1	1	0	0	2	0
ENSMUSG00000051344	protein_coding	Plekhm3		chr1	64785983	64956824	170842	-	275	385	444	462	295	283	356	273	309	346	381	363	460	322	456	381	353
ENSMUSG00000097264	processed_pseudogene	Rpl31-ps24	pseudo_consens	chr1	64934402	64934780	379	+	1	0	0	0	0	0	0	1	0	0	0	0	0	0	0	0	0
ENSMUSG00000084416	processed_pseudogene	Rpl10a-ps1		chr1	64993951	64994604	654	-	221	153	165	211	129	172	181	164	219	133	134	102	123	155	159	179	116
ENSMUSG00000025955	protein_coding	Akr1cl		chr1	65012689	65032759	20071	-	3	2	0	3	2	2	1	0	1	0	9	0	2	1	0	0	1
ENSMUSG00000090042	processed_pseudogene	Gm8550	pseudo_consens	chr1	65028080	65028732	653	+	0	0	0	0	1	0	0	0	0	0	0	0	0	0	1	0	0
ENSMUSG00000067299	protein_coding	Crygd		chr1	65061872	65063452	1581	-	0	1	0	1	0	0	0	0	0	0	0	0	0	0	1	0	1
ENSMUSG00000100774	processed_pseudogene	Gm7329	pseudo_consens	chr1	65095227	65095436	210	+	0	0	0	0	0	0	0	0	0	0	0	1	0	0	0	0	0
ENSMUSG00000044429	protein_coding	Cryga	overlapping_locus	chr1	65100389	65103373	2985	-	0	2	0	0	1	0	0	0	0	0	0	0	0	0	0	0	0
ENSMUSG00000044816	protein_coding	D630023F18Rik	overlapping_locus	chr1	65105285	65123214	17930	-	4	2	1	2	1	2	1	2	2	0	6	6	2	3	3	9	6
ENSMUSG00000025950	protein_coding	Idh1		chr1	65158616	65186500	27885	-	2623	3163	2946	3376	3581	3059	3349	3285	3021	3077	3338	2823	3038	3151	3104	3012	3056
ENSMUSG00000025949	protein_coding	Pikfyve		chr1	65186683	65278695	92013	+	659	855	896	929	662	667	743	658	703	633	657	754	870	647	723	753	663
ENSMUSG00000025946	protein_coding	Pth2r		chr1	65282056	65389244	107189	+	3	4	4	5	7	7	4	7	2	3	4	3	1	2	5	6	3
ENSMUSG00000100503	unprocessed_pseudogene	Gm28927		chr1	65420850	65421121	272	-	0	0	0	1	0	1	0	0	0	0	1	0	0	0	0	0	0
ENSMUSG00000100504	unprocessed_pseudogene	Gm28926	overlapping_locus	chr1	65421124	65421803	680	-	0	0	1	1	2	1	2	2	1	3	2	0	1	1	1	3	1
ENSMUSG00000100340	processed_pseudogene	Gm28923	pseudo_consens	chr1	65438664	65438985	322	-	0	0	1	0	0	0	0	0	0	0	0	0	0	0	0	0	0
ENSMUSG00000100439	processed_pseudogene	Gm28922	pseudo_consens	chr1	65470201	65470508	308	-	0	0	0	0	1	0	0	1	0	0	0	0	0	0	0	0	0
ENSMUSG00000099819	processed_pseudogene	Gm28728	pseudo_consens	chr1	65523671	65524075	405	-	0	0	0	0	0	0	0	0	0	0	0	0	0	0	0	0	0
ENSMUSG00000082774	processed_pseudogene	Gm8805	pseudo_consens	chr1	65552682	65552994	313	+	6	3	5	6	1	5	4	2	5	4	1	1	1	9	1	2	0
ENSMUSG00000081623	processed_pseudogene	Gm8809	pseudo_consens	chr1	66032183	66032925	743	-	0	0	1	0	2	0	0	0	0	0	0	1	0	0	0	0	0
ENSMUSG00000083242	processed_pseudogene	Gm15659	pseudo_consens	chr1	66033085	66033425	341	+	0	0	0	0	1	0	0	0	0	0	1	1	0	0	0	0	0
ENSMUSG00000083289	processed_pseudogene	Gm8812	pseudo_consens	chr1	66062965	66063376	412	+	1	1	0	1	0	0	0	0	0	0	0	2	0	0	0	0	0
ENSMUSG00000015222	protein_coding	Map2	ncRNA_host	chr1	66175273	66442583	267311	+	1769	1691	3025	2150	1503	1395	1676	1308	2169	1475	1924	1529	2246	1628	2728	1787	1639
ENSMUSG00000073656	lncRNA	Gm10558		chr1	66322276	66328796	6521	-	12	6	6	8	5	5	6	2	4	4	7	4	0	1	1	12	3
ENSMUSG00000065694	snRNA	Gm25411		chr1	66436082	66436232	151	+	0	0	0	0	0	0	0	0	0	1	0	0	0	1	0	0	1
ENSMUSG00000055567	protein_coding	Unc80		chr1	66468367	66699148	230782	+	28	41	50	59	31	41	50	31	35	41	35	49	32	28	34	58	41
ENSMUSG00000103375	TEC	Gm37181		chr1	66690630	66692356	1727	-	0	0	1	0	0	0	0	0	2	0	0	0	1	0	0	0	0
ENSMUSG00000026005	protein_coding	Rpe		chr1	66700831	66719805	18975	+	593	577	895	629	573	602	654	625	799	562	513	569	617	679	675	655	609
ENSMUSG00000026004	protein_coding	Kansl1l	overlapping_locus	chr1	66719248	66817562	98315	-	351	414	473	481	372	334	395	420	441	438	443	470	477	402	403	466	380
ENSMUSG00000102559	TEC	Gm37570	overlapping_locus	chr1	66765626	66768731	3106	-	8	12	11	16	7	12	4	0	6	7	10	12	19	6	5	5	13
ENSMUSG00000102374	TEC	Gm38387	overlapping_locus	chr1	66769290	66771866	2577	-	0	9	3	3	5	3	0	2	4	2	5	3	7	9	4	5	3
ENSMUSG00000102776	TEC	Gm38162		chr1	66775511	66780107	4597	+	8	5	6	13	11	7	9	10	8	3	5	8	6	4	7	2	11
ENSMUSG00000082057	processed_pseudogene	Gm15789	pseudo_consens	chr1	66783913	66786445	2533	+	2	1	4	8	1	5	4	1	1	1	4	5	6	7	5	3	1
ENSMUSG00000103756	TEC	Gm37285	overlapping_locus	chr1	66799659	66800797	1139	-	1	1	3	7	2	0	5	4	4	1	2	2	1	2	2	2	4
ENSMUSG00000103382	TEC	Gm37755		chr1	66812315	66814493	2179	+	2	2	5	7	3	4	5	8	7	2	4	7	10	3	6	11	9
ENSMUSG00000103553	TEC	Gm38218		chr1	66821226	66825914	4689	-	1	3	0	2	3	3	2	1	0	1	5	1	5	4	4	1	1
ENSMUSG00000026003	protein_coding	Acadl	overlapping_locus	chr1	66830839	66863277	32439	-	1059	1453	1651	1464	1369	1330	1454	1586	1454	1866	1516	1657	1728	1450	1463	1636	1393
ENSMUSG00000082769	processed_pseudogene	Gm15793	overlapping_locus	chr1	66849108	66849602	495	-	3	5	2	0	1	2	4	0	5	4	3	3	4	1	5	2	3
ENSMUSG00000089420	snRNA	Gm27934		chr1	66856641	66856703	63	+	0	0	0	0	0	0	0	0	0	0	0	0	0	0	0	0	0
ENSMUSG00000061816	protein_coding	Myl1		chr1	66924295	66945404	21110	-	1742	2339	1795	2993	2843	2858	2471	3268	3425	2854	2764	2382	2556	2694	1567	3328	2076
ENSMUSG00000094191	processed_pseudogene	Rpl31-ps14		chr1	66948563	66948940	378	-	6	6	9	6	4	4	5	7	9	4	6	5	4	10	3	5	7
ENSMUSG00000026000	protein_coding	Lancl1		chr1	67000517	67038872	38356	-	2447	2538	2929	2809	2150	2121	2142	2239	2598	2076	1945	2097	2223	2218	2559	2088	1956
ENSMUSG00000025991	protein_coding	Cps1		chr1	67123026	67231259	108234	+	16	15	10	6	6	8	11	4	9	5	18	7	10	14	5	10	9
ENSMUSG00000062209	protein_coding	Erbb4	overlapping_locus	chr1	68032186	69108059	1075874	-	27	52	34	72	54	66	48	39	56	31	66	56	58	50	27	54	32
ENSMUSG00000083795	processed_pseudogene	Gm15670	overlapping_locus	chr1	68293280	68293726	447	-	0	0	1	0	0	1	0	0	0	0	0	0	1	0	1	0	0
ENSMUSG00000103642	TEC	Gm37769	overlapping_locus	chr1	68711037	68713405	2369	-	0	0	0	0	0	0	0	0	0	0	1	0	0	0	0	0	0
ENSMUSG00000087514	lncRNA	Gm16076	overlapping_locus	chr1	69091913	69106740	14828	-	1	0	1	1	0	0	0	0	0	0	0	0	0	0	0	0	0
ENSMUSG00000084332	processed_pseudogene	Gm8840	pseudo_consens	chr1	69130914	69131299	386	-	2	3	1	0	0	1	2	1	0	1	0	0	1	2	1	3	2
ENSMUSG00000101387	processed_pseudogene	Pced1c-ps	pseudo_consens	chr1	69377321	69378071	751	+	0	1	0	0	0	0	0	0	0	0	0	0	0	0	0	0	0
ENSMUSG00000099804	lncRNA	Gm28497		chr1	69441056	69444084	3029	+	3	4	3	4	0	1	0	1	6	7	1	3	6	5	4	5	6
ENSMUSG00000100354	lncRNA	Gm29113		chr1	69490357	69493788	3432	-	0	0	0	0	1	0	0	0	0	1	1	0	0	0	0	0	1
ENSMUSG00000101156	lncRNA	Gm29114		chr1	69513932	69547707	33776	+	2	2	0	0	0	3	0	2	1	0	0	0	2	1	0	0	0
ENSMUSG00000025997	protein_coding	Ikzf2	overlapping_locus	chr1	69531214	69687245	156032	-	452	529	662	726	416	405	536	437	561	470	468	576	652	519	553	589	514
ENSMUSG00000100815	lncRNA	Gm29112	overlapping_locus	chr1	69595036	69598522	3487	-	0	1	0	0	1	0	1	1	0	0	1	0	0	0	0	1	1
ENSMUSG00000099954	lncRNA	Gm28112	overlapping_locus	chr1	69660187	69662061	1875	-	0	0	0	0	0	0	0	0	0	1	0	0	3	1	0	0	0
ENSMUSG00000103402	TEC	Gm37930		chr1	69770868	69772753	1886	+	0	0	0	0	0	0	0	0	0	0	0	0	0	0	0	0	0
ENSMUSG00000053153	protein_coding	Spag16	ncRNA_host	chr1	69826970	70725132	898163	+	0	1	1	0	0	0	0	0	0	0	0	0	2	0	1	0	1
ENSMUSG00000080524	snRNA	Gm23879		chr1	69955004	69955129	126	-	0	0	0	0	0	0	0	0	0	1	0	1	0	3	0	0	1
ENSMUSG00000101730	unprocessed_pseudogene	Gm28580		chr1	70067968	70068055	88	-	2	0	2	1	1	1	1	2	2	0	1	1	0	1	0	0	1
ENSMUSG00000075952	snRNA	Gm23422		chr1	70596815	70596921	107	+	0	1	0	0	0	0	0	0	0	0	0	0	0	0	0	0	0
ENSMUSG00000045648	protein_coding	Vwc2l		chr1	70725715	70885397	159683	+	0	0	0	0	0	0	0	0	0	0	0	0	0	0	0	1	0
ENSMUSG00000026196	protein_coding	Bard1	overlapping_locus	chr1	71027498	71103146	75649	-	79	121	134	113	99	79	66	85	85	44	50	62	66	95	84	71	70
ENSMUSG00000089965	processed_pseudogene	Gm16236	overlapping_locus	chr1	71039652	71040030	379	-	0	0	1	0	1	0	1	1	0	0	0	1	0	0	0	0	0
ENSMUSG00000101551	processed_pseudogene	Gm8870	pseudo_consens	chr1	71155246	71156020	775	-	1	6	4	2	3	0	3	1	1	0	3	3	1	3	1	2	3
ENSMUSG00000050296	protein_coding	Abca12		chr1	71242276	71414910	172635	-	2721	2965	4848	3636	2259	1915	2561	1762	2491	2396	3095	2493	4495	2114	3522	2783	2345
ENSMUSG00000026192	protein_coding	Atic		chr1	71557150	71579631	22482	+	717	976	1478	935	1005	919	960	883	785	830	843	819	843	917	1021	1014	890
ENSMUSG00000026193	protein_coding	Fn1		chr1	71585520	71653200	67681	-	1834	3653	3806	4012	2579	1966	3178	2333	2681	2442	2667	2539	4899	2909	4064	2890	3724
ENSMUSG00000073652	lncRNA	Apol7d		chr1	71652837	71662843	10007	+	1	3	0	3	0	1	3	0	1	1	2	1	0	2	2	3	3
ENSMUSG00000101834	processed_pseudogene	Gm5829		chr1	71709705	71710055	351	-	1	1	1	1	1	0	1	0	1	3	1	2	0	0	3	2	2
ENSMUSG00000100319	processed_pseudogene	Gm5256	pseudo_consens	chr1	71714048	71714924	877	-	1	0	2	0	0	3	0	0	2	1	0	2	4	2	2	2	1
ENSMUSG00000099707	lncRNA	Gm8883		chr1	71888112	71891204	3093	+	1	0	0	0	1	0	1	1	0	0	0	1	1	1	0	1	0
ENSMUSG00000101211	lncRNA	Gm28818		chr1	71894068	71917125	23058	-	1	0	0	1	0	0	1	1	1	0	1	0	1	0	1	0	2
ENSMUSG00000101848	lncRNA	4933417E11Rik	overlapping_locus	chr1	71958998	72005195	46198	-	0	0	0	0	1	0	0	0	0	0	0	0	1	0	0	0	0
ENSMUSG00000101764	lncRNA	4930556G22Rik	overlapping_locus	chr1	71983681	72038731	55051	-	0	0	0	1	0	0	0	0	0	0	0	0	0	0	0	0	0
ENSMUSG00000059483	processed_pseudogene	Gm5528	overlapping_locus	chr1	72004288	72004767	480	+	6	7	15	9	13	8	17	11	10	6	7	8	8	8	13	10	6
ENSMUSG00000101496	processed_pseudogene	Gm8885	pseudo_consens	chr1	72087857	72088454	598	+	6	3	6	8	9	3	9	1	8	6	12	5	7	4	9	6	1
ENSMUSG00000102123	lncRNA	Gm4319		chr1	72107155	72122001	14847	-	3	1	0	0	2	0	3	0	0	0	0	0	2	1	0	1	0
ENSMUSG00000039395	protein_coding	Mreg		chr1	72159442	72212307	52866	-	1436	1718	1839	1776	1579	1397	1666	1490	1619	1422	1377	1226	1631	1231	1582	1362	1151
ENSMUSG00000094050	snRNA	Gm23472		chr1	72236946	72237136	191	+	0	0	1	0	0	0	0	0	0	0	0	1	0	2	0	0	0
ENSMUSG00000093956	snRNA	Gm24497		chr1	72244213	72244403	191	+	0	0	0	0	0	0	0	1	0	1	0	0	2	0	1	0	1
ENSMUSG00000093843	snRNA	Gm25939		chr1	72255008	72255198	191	+	0	0	1	1	0	0	0	0	1	0	0	1	1	0	0	0	0
ENSMUSG00000026189	protein_coding	Pecr		chr1	72259167	72284314	25148	-	323	366	423	373	354	348	323	370	326	317	280	288	304	347	346	369	302
ENSMUSG00000026188	protein_coding	Tmem169		chr1	72284369	72303104	18736	+	4	7	6	5	5	3	3	9	2	6	8	3	1	4	13	10	8
ENSMUSG00000026187	protein_coding	Xrcc5		chr1	72307427	72394952	87526	+	508	666	849	694	655	577	639	616	627	567	541	512	647	584	609	632	540
ENSMUSG00000039372	protein_coding	March4		chr1	72427112	72536930	109819	-	0	0	0	0	0	1	1	0	1	0	1	2	1	1	2	1	0
ENSMUSG00000085812	processed_pseudogene	Gm15843	pseudo_consens	chr1	72459499	72460027	529	+	5	7	4	5	5	8	4	5	11	8	4	7	3	6	5	3	5
ENSMUSG00000039354	protein_coding	Smarcal1		chr1	72583251	72633134	49884	+	410	501	517	553	411	416	470	426	479	453	388	464	529	464	460	485	427
ENSMUSG00000110712	lncRNA	Gm39662		chr1	72641188	72642963	1776	+	0	2	1	0	0	0	0	0	0	0	0	0	0	1	0	0	0
ENSMUSG00000046330	protein_coding	Rpl37a		chr1	72711290	72713813	2524	+	1114	955	1015	900	1063	1055	1262	867	1267	1194	1174	906	820	1192	1292	1107	987
ENSMUSG00000039323	protein_coding	Igfbp2		chr1	72824503	72852474	27972	+	1618	1540	1979	1102	1179	1080	1206	1180	1505	1141	1207	894	1154	1789	2110	1321	1481
ENSMUSG00000026185	protein_coding	Igfbp5		chr1	72857932	72874884	16953	-	6010	8857	7493	11938	8767	7616	8932	7179	9096	5859	6164	6445	9380	7433	10440	9320	6730
ENSMUSG00000102266	TEC	Gm38106		chr1	73206890	73209423	2534	-	0	0	0	0	0	0	0	0	0	0	0	0	0	0	0	0	1
ENSMUSG00000101112	lncRNA	Gm29185		chr1	73269064	73306360	37297	+	0	0	0	0	0	0	0	0	0	0	0	0	0	0	0	0	0
ENSMUSG00000099877	lncRNA	Pinc		chr1	73390775	73407569	16795	-	0	1	0	1	0	0	0	0	0	0	0	0	0	0	0	0	0
ENSMUSG00000101812	lncRNA	D530049I02Rik		chr1	73398968	73430790	31823	+	0	0	0	0	0	0	0	0	0	1	0	0	0	0	0	0	0
ENSMUSG00000100044	processed_pseudogene	Gm9553	pseudo_consens	chr1	73512046	73513041	996	+	1	0	0	0	0	0	0	0	0	0	0	0	0	0	0	1	0
ENSMUSG00000100444	lncRNA	C530043A13Rik		chr1	73522095	73529790	7696	-	3	3	0	2	0	2	0	1	1	1	1	0	0	0	0	1	1
ENSMUSG00000100429	lncRNA	Gm29186		chr1	73528937	73536349	7413	+	0	0	0	0	0	0	0	1	0	0	0	0	0	0	0	0	0
ENSMUSG00000100301	lncRNA	6030407O03Rik	overlapping_locus	chr1	73618088	73864466	246379	-	12	14	14	14	13	22	10	8	12	15	19	23	12	12	13	15	12
ENSMUSG00000101344	lncRNA	Gm29183	overlapping_locus	chr1	73750321	73841917	91597	-	2	3	6	3	3	3	5	1	5	4	0	5	1	6	7	3	2
ENSMUSG00000088666	rRNA	Gm25329		chr1	73763710	73763835	126	+	0	0	0	0	0	0	0	1	0	0	0	0	0	0	0	0	0
ENSMUSG00000098504	miRNA	Mir6351		chr1	73855477	73855575	99	-	0	0	0	0	1	0	0	0	0	0	0	0	0	1	0	0	0
ENSMUSG00000055322	protein_coding	Tns1		chr1	73910231	74124449	214219	-	4062	7497	6127	7549	5960	5721	6735	5437	5295	5546	5446	6209	7991	4624	6441	6340	5681
ENSMUSG00000061815	protein_coding	Rufy4		chr1	74125541	74148223	22683	+	54	74	56	80	54	53	63	71	46	54	59	72	64	58	58	75	65
ENSMUSG00000026180	protein_coding	Cxcr2		chr1	74153989	74161246	7258	+	158	88	226	91	88	66	92	46	89	64	79	82	138	83	131	91	88
ENSMUSG00000048480	protein_coding	Cxcr1		chr1	74191785	74194631	2847	-	0	0	0	1	0	0	0	0	0	0	0	0	0	0	0	0	0
ENSMUSG00000006304	protein_coding	Arpc2		chr1	74236084	74268209	32126	+	4599	5544	7144	5649	5017	4795	5418	5263	4797	5141	5038	4922	5759	4768	5497	5203	4548
ENSMUSG00000064272	protein_coding	Gpbar1		chr1	74278550	74279624	1075	+	4	1	1	1	3	3	0	1	3	1	1	1	0	0	0	2	0
ENSMUSG00000006299	protein_coding	Aamp		chr1	74279840	74284738	4899	-	2482	2816	3331	2778	2589	2501	2765	2661	2632	2575	2419	2473	2869	2492	3008	2815	2389
ENSMUSG00000026179	protein_coding	Pnkd	overlapping_locus	chr1	74284930	74353694	68765	+	832	1073	1166	1010	827	799	938	867	984	969	884	1099	1228	1001	1381	1076	906
ENSMUSG00000103013	TEC	Gm37503		chr1	74287542	74287860	319	-	8	3	8	7	2	12	10	6	14	8	9	8	13	18	9	5	3
ENSMUSG00000006301	protein_coding	Tmbim1		chr1	74288247	74305622	17376	-	2567	3011	3684	3317	2686	2751	3058	2867	3196	3448	3303	3288	3673	3106	3656	3418	2942
ENSMUSG00000103403	TEC	Gm37931	overlapping_locus	chr1	74307848	74310713	2866	+	2	1	1	1	2	0	2	1	1	0	1	1	1	1	1	3	0
ENSMUSG00000073650	protein_coding	Catip		chr1	74362108	74369321	7214	+	4	7	3	8	8	11	10	6	8	8	6	7	8	7	3	2	5
ENSMUSG00000026177	protein_coding	Slc11a1		chr1	74375195	74386062	10868	+	31	60	50	92	21	35	41	54	36	49	48	53	91	56	48	43	44
ENSMUSG00000026176	protein_coding	Ctdsp1	ncRNA_host	chr1	74391509	74397285	5777	+	975	1298	1298	1243	1156	1105	1243	1238	1170	1205	1199	1203	1329	1082	1358	1240	1165
ENSMUSG00000065468	miRNA	Mir26b		chr1	74394310	74394394	85	+	1	1	0	1	0	0	0	0	2	0	0	0	0	0	1	0	0
ENSMUSG00000026175	protein_coding	Vil1		chr1	74409376	74435559	26184	+	1	4	2	5	5	3	1	5	5	4	1	2	4	0	2	1	1
ENSMUSG00000033364	protein_coding	Usp37	overlapping_locus	chr1	74435511	74544284	108774	-	333	450	537	475	390	347	370	314	327	386	361	333	408	407	412	415	379
ENSMUSG00000103227	TEC	Gm37733	overlapping_locus	chr1	74500340	74503301	2962	-	0	0	1	1	1	1	0	0	0	0	0	0	2	0	2	0	0
ENSMUSG00000026174	protein_coding	Cnot9		chr1	74506058	74530842	24785	+	993	1229	1352	1214	1166	980	1114	994	1001	1003	1002	922	1077	942	1142	951	932
ENSMUSG00000026173	protein_coding	Plcd4		chr1	74542888	74567794	24907	+	13	25	11	27	25	22	22	20	31	11	16	18	20	14	13	28	19
ENSMUSG00000026135	protein_coding	Zfp142	ncRNA_host	chr1	74565127	74588246	23120	-	176	319	301	311	220	198	215	217	190	238	197	246	361	212	254	194	219
ENSMUSG00000093155	miRNA	Gm25035		chr1	74586896	74586972	77	-	0	0	0	0	0	0	0	0	0	1	0	0	0	1	0	0	0
ENSMUSG00000026172	protein_coding	Bcs1l		chr1	74588289	74592443	4155	+	165	169	229	201	178	164	184	211	217	188	188	206	174	255	237	226	223
ENSMUSG00000026171	protein_coding	Rnf25		chr1	74593748	74601397	7650	-	485	544	652	688	546	543	614	584	641	579	539	585	647	578	618	571	549
ENSMUSG00000033276	protein_coding	Stk36		chr1	74601445	74636894	35450	+	21	20	25	35	25	10	19	30	20	11	21	18	24	18	24	12	26
ENSMUSG00000033257	protein_coding	Ttll4		chr1	74661745	74703730	41986	+	799	875	787	1164	723	705	855	686	808	643	586	779	879	798	717	857	679
ENSMUSG00000026170	protein_coding	Cyp27a1		chr1	74713574	74737892	24319	+	195	202	175	357	184	195	256	204	276	238	228	259	345	271	260	301	223
ENSMUSG00000006542	protein_coding	Prkag3		chr1	74738922	74749221	10300	-	44	59	62	95	78	50	53	57	91	45	42	44	59	60	40	65	39
ENSMUSG00000033227	protein_coding	Wnt6		chr1	74771892	74785322	13431	+	101	132	108	124	157	140	148	159	108	149	116	133	147	158	201	137	170
ENSMUSG00000099472	lncRNA	Gm29539		chr1	74774943	74777405	2463	-	3	2	1	1	5	1	3	8	4	2	4	1	2	4	5	3	2
ENSMUSG00000026167	protein_coding	Wnt10a		chr1	74791516	74804179	12664	+	829	949	1258	843	926	933	934	776	700	1012	790	991	1028	855	952	997	820
ENSMUSG00000090071	protein_coding	Cdk5r2	overlapping_locus	chr1	74854934	74857732	2799	+	0	0	0	0	0	0	0	0	0	0	0	0	0	2	1	0	1
ENSMUSG00000055197	protein_coding	Fev		chr1	74881509	74885419	3911	-	0	0	0	0	0	0	0	0	0	0	0	0	0	0	0	0	0
ENSMUSG00000006546	protein_coding	Cryba2		chr1	74889934	74893143	3210	-	2	1	1	0	1	1	0	1	0	0	0	0	1	2	1	1	3
ENSMUSG00000047021	protein_coding	Cfap65		chr1	74902071	74935599	33529	-	0	1	1	2	1	1	0	2	1	0	1	1	1	2	1	0	0
ENSMUSG00000006538	protein_coding	Ihh		chr1	74945315	74951672	6358	-	1	2	3	3	3	1	3	1	2	4	1	5	6	4	1	4	1
ENSMUSG00000103145	TEC	Gm37744		chr1	74954252	74955841	1590	+	2	0	0	2	0	0	0	1	1	1	1	1	1	1	1	0	0
ENSMUSG00000026162	protein_coding	Nhej1	fragmented_locus	chr1	74967139	75125200	158062	-	64	63	85	67	79	76	78	57	84	66	81	64	47	74	76	63	69
ENSMUSG00000026205	protein_coding	Slc23a3		chr1	75125541	75133890	8350	-	121	100	110	148	97	103	91	73	71	79	77	92	109	78	104	87	71
ENSMUSG00000033159	protein_coding	Cnppd1		chr1	75134554	75142711	8158	-	1524	1859	2126	2033	1651	1384	1646	1703	1585	1684	1563	1565	1962	1463	1751	1401	1425
ENSMUSG00000049339	protein_coding	Retreg2		chr1	75142778	75147913	5136	+	2076	2412	2521	2384	2348	2191	2298	2214	2233	2091	2189	2135	2364	1932	2483	2109	1884
ENSMUSG00000026197	protein_coding	Zfand2b		chr1	75168646	75171629	2984	+	739	668	774	828	713	815	838	791	872	728	789	670	770	740	781	754	672
ENSMUSG00000026198	protein_coding	Abcb6	overlapping_locus	chr1	75171717	75180392	8676	-	23	35	40	55	42	29	54	40	44	27	26	28	37	54	35	27	30
ENSMUSG00000033124	protein_coding	Atg9a	overlapping_locus	chr1	75180860	75192196	11337	-	413	640	677	661	482	450	530	444	468	428	383	484	651	358	449	516	423
ENSMUSG00000026199	protein_coding	Ankzf1		chr1	75192151	75199387	7237	+	334	364	406	494	289	259	355	289	341	298	264	378	376	352	363	344	327
ENSMUSG00000026200	protein_coding	Glb1l	ncRNA_host	chr1	75198236	75210813	12578	-	102	120	84	179	111	84	103	124	107	92	88	140	130	145	106	87	113
ENSMUSG00000026201	protein_coding	Stk16		chr1	75210838	75215606	4769	+	465	408	710	542	402	470	506	463	572	452	410	517	468	615	637	596	523
ENSMUSG00000026202	protein_coding	Tuba4a		chr1	75214228	75219865	5638	-	6152	6365	12757	6047	5844	5551	6375	5586	5306	6202	6086	5420	7642	5442	6115	6587	5064
ENSMUSG00000096094	protein_coding	A630095N17Rik		chr1	75220095	75232102	12008	-	4	7	11	18	8	2	4	9	19	15	6	5	15	5	11	4	9
ENSMUSG00000026203	protein_coding	Dnajb2		chr1	75236406	75245692	9287	+	1008	1204	1392	1095	1034	932	994	1000	1062	1205	1052	1156	1333	1118	1441	1288	1106
ENSMUSG00000026204	protein_coding	Ptprn		chr1	75247027	75264502	17476	-	5	15	15	14	14	10	11	12	16	11	14	18	17	10	17	7	10
ENSMUSG00000101840	lncRNA	Gm28294		chr1	75252322	75257427	5106	+	0	0	0	1	0	0	0	0	0	0	0	0	0	0	0	0	0
ENSMUSG00000033061	protein_coding	Resp18		chr1	75272199	75278415	6217	-	1	0	0	0	0	2	0	1	0	0	0	0	0	0	0	0	1
ENSMUSG00000026209	protein_coding	Dnpep		chr1	75307896	75317990	10095	-	1128	1320	1586	1397	1333	1298	1330	1302	1452	1305	1139	1235	1318	1365	1388	1331	1247
ENSMUSG00000026208	protein_coding	Des		chr1	75360329	75368579	8251	+	3140	5115	4814	6009	5445	5273	5058	6314	6431	5325	4508	4853	5520	4507	3095	6008	4017
ENSMUSG00000085653	lncRNA	Gm15179		chr1	75368212	75375012	6801	-	3	3	2	2	2	5	1	6	3	5	0	3	2	3	2	2	4
ENSMUSG00000026207	protein_coding	Speg		chr1	75375297	75432320	57024	+	260	545	364	638	487	515	472	474	518	377	321	489	543	452	291	580	377
ENSMUSG00000086053	lncRNA	Gm15178		chr1	75392131	75396363	4233	-	1	0	0	0	0	0	0	0	0	0	0	0	0	0	0	0	1
ENSMUSG00000033021	protein_coding	Gmppa		chr1	75435930	75443179	7250	+	601	780	810	873	667	642	721	710	727	622	584	657	798	805	831	748	708
ENSMUSG00000033007	protein_coding	Asic4		chr1	75450436	75474343	23908	+	0	1	3	1	2	0	1	2	3	2	1	3	1	2	0	2	2
ENSMUSG00000102605	TEC	Gm37264		chr1	75468570	75470761	2192	-	0	0	0	0	0	0	0	0	0	0	0	0	2	0	0	0	1
ENSMUSG00000032997	protein_coding	Chpf		chr1	75474569	75479307	4739	-	257	401	345	385	328	278	370	302	345	295	374	350	486	321	440	378	355
ENSMUSG00000026211	protein_coding	Obsl1		chr1	75479310	75506452	27143	-	255	394	339	432	307	323	290	337	300	288	283	353	427	341	271	417	302
ENSMUSG00000051703	protein_coding	Tmem198		chr1	75479532	75485705	6174	+	11	17	13	22	7	20	6	8	13	9	7	9	13	13	19	10	4
ENSMUSG00000032968	protein_coding	Inha		chr1	75507077	75510366	3290	+	79	96	85	154	93	80	105	108	106	59	73	108	144	97	101	104	86
ENSMUSG00000026213	protein_coding	Stk11ip		chr1	75521529	75537335	15807	+	476	670	661	818	592	524	606	506	538	432	454	551	601	502	575	552	503
ENSMUSG00000006576	protein_coding	Slc4a3		chr1	75546266	75562172	15907	+	150	231	188	295	194	205	231	226	235	184	211	240	281	255	261	315	222
ENSMUSG00000083244	processed_pseudogene	Gm15180	pseudo_consens	chr1	75568083	75568574	492	+	0	0	0	0	0	0	0	0	0	0	1	1	0	0	0	1	0
ENSMUSG00000082528	processed_pseudogene	Gm15182		chr1	75624654	75626329	1676	+	0	0	0	1	0	0	0	0	0	0	0	0	0	0	0	0	0
ENSMUSG00000082012	processed_pseudogene	Gm5257	pseudo_consens	chr1	75636390	75637179	790	+	2	0	5	2	1	1	3	2	2	0	3	4	1	1	1	0	0
ENSMUSG00000100827	lncRNA	Gm29069	overlapping_locus	chr1	76420692	76528422	107731	+	0	1	0	0	0	0	0	0	0	0	0	0	0	0	0	0	0
ENSMUSG00000100534	lncRNA	Gm816		chr1	76890472	77027792	137321	-	0	0	1	0	0	1	0	2	0	0	0	0	0	0	0	1	0
ENSMUSG00000102904	TEC	Gm38265		chr1	77143227	77146992	3766	-	0	0	0	0	1	0	0	0	0	0	0	2	0	0	0	0	0
ENSMUSG00000026235	protein_coding	Epha4	ncRNA_host	chr1	77367185	77515088	147904	-	669	686	1096	626	476	439	530	443	531	605	694	553	831	615	801	766	645
ENSMUSG00000099141	miRNA	Mir6352		chr1	77496653	77496768	116	-	0	0	0	0	0	0	0	0	0	0	0	0	0	0	0	0	1
ENSMUSG00000101849	lncRNA	Gm28386		chr1	77515280	77517128	1849	+	8	8	12	6	5	4	4	8	4	2	9	5	4	7	9	3	7
ENSMUSG00000102052	lncRNA	Gm28387		chr1	77942966	77972376	29411	-	0	0	0	0	0	0	0	0	0	0	1	0	0	0	0	0	0
ENSMUSG00000004872	protein_coding	Pax3		chr1	78101267	78197134	95868	-	28	54	41	28	31	42	33	34	32	54	28	44	51	47	50	48	47
ENSMUSG00000032908	protein_coding	Sgpp2	overlapping_locus	chr1	78310345	78420289	109945	+	1155	1332	1565	1099	1428	1088	1391	1642	2593	1248	737	1219	1037	1795	1952	2005	2205
ENSMUSG00000102945	TEC	Gm37884	overlapping_locus	chr1	78375614	78376431	818	+	0	0	0	0	0	0	0	0	0	0	0	1	0	0	0	1	0
ENSMUSG00000026245	protein_coding	Farsb	overlapping_locus	chr1	78417975	78488897	70923	-	536	704	958	689	606	570	572	555	596	600	583	569	655	585	665	636	608
ENSMUSG00000101798	unprocessed_pseudogene	Gm28995	overlapping_locus	chr1	78433352	78433612	261	+	0	0	0	0	0	0	1	1	0	1	0	0	1	0	0	0	0
ENSMUSG00000104018	TEC	4833412K13Rik	overlapping_locus	chr1	78465448	78466926	1479	-	6	10	2	14	4	1	6	8	4	8	5	3	7	8	9	6	4
ENSMUSG00000090486	protein_coding	BC035947	overlapping_locus	chr1	78497026	78512158	15133	-	11	26	15	10	9	8	17	20	13	13	23	18	14	13	22	28	19
ENSMUSG00000012187	protein_coding	Mogat1		chr1	78510991	78538173	27183	+	21	31	21	26	25	28	30	24	17	39	33	47	31	40	42	54	43
ENSMUSG00000099364	lncRNA	5730419F03Rik		chr1	78595031	78609508	14478	-	3	8	2	8	3	6	3	9	7	4	6	5	5	4	0	7	7
ENSMUSG00000100562	lncRNA	Gm29611		chr1	78615467	78620165	4699	+	0	0	0	0	0	0	0	0	0	0	1	0	0	0	0	0	0
ENSMUSG00000032883	protein_coding	Acsl3	overlapping_locus	chr1	78657825	78707743	49919	+	487	501	539	512	625	502	480	565	522	531	555	481	544	569	537	541	521
ENSMUSG00000079470	protein_coding	Utp14b	overlapping_locus	chr1	78658038	78671512	13475	+	103	150	125	140	130	114	118	128	118	108	128	102	145	113	125	132	96
ENSMUSG00000099377	processed_pseudogene	Gm6159	pseudo_consens	chr1	78783136	78784859	1724	-	0	4	4	2	4	3	3	3	0	3	6	2	5	4	1	3	2
ENSMUSG00000099706	lncRNA	Gm29536	overlapping_locus	chr1	78791623	79224511	432889	-	0	0	0	0	0	0	0	0	0	0	0	0	0	1	0	0	0
ENSMUSG00000047330	protein_coding	Kcne4		chr1	78816758	78820028	3271	+	70	73	31	106	73	80	107	73	72	76	91	84	79	91	76	59	79
ENSMUSG00000101324	lncRNA	Gm29187		chr1	78821258	78822652	1395	+	0	0	0	0	2	0	0	0	0	0	0	0	0	1	0	1	0
ENSMUSG00000072978	processed_pseudogene	Gm5830	overlapping_locus	chr1	78967637	78968079	443	-	0	0	0	0	0	0	0	0	0	0	0	3	0	0	0	0	0
ENSMUSG00000050711	protein_coding	Scg2		chr1	79434669	79440120	5452	-	2	0	0	0	0	0	0	0	0	1	0	0	0	0	0	1	2
ENSMUSG00000099562	processed_pseudogene	Gm19027	pseudo_consens	chr1	79505803	79507157	1355	-	1	1	3	1	0	2	0	2	4	0	1	3	2	1	2	0	0
ENSMUSG00000054702	protein_coding	Ap1s3	overlapping_locus	chr1	79606876	79671972	65097	-	223	253	384	236	209	214	236	227	274	241	272	226	272	243	266	195	200
ENSMUSG00000102235	TEC	Gm37886	overlapping_locus	chr1	79619522	79621034	1513	-	0	1	1	2	0	0	1	0	2	0	1	1	1	0	2	2	0
ENSMUSG00000073643	protein_coding	Wdfy1		chr1	79702262	79776143	73882	-	629	777	818	857	740	573	694	613	678	687	681	676	826	612	730	688	671
ENSMUSG00000104497	TEC	Gm10555		chr1	79762717	79764507	1791	+	0	0	0	1	0	0	0	0	0	0	0	0	0	0	0	0	0
ENSMUSG00000026248	protein_coding	Mrpl44		chr1	79776018	79781445	5428	+	660	632	784	621	682	692	661	678	745	634	595	565	610	694	731	633	582
ENSMUSG00000026249	protein_coding	Serpine2		chr1	79794197	79861180	66984	-	604	848	739	895	776	703	737	819	698	896	986	879	937	745	873	774	815
ENSMUSG00000067106	processed_pseudogene	Gm5529	pseudo_consens	chr1	79922536	79923426	891	-	0	0	0	1	1	1	0	1	0	0	0	1	1	1	1	0	1
ENSMUSG00000100397	processed_pseudogene	Gm28071	pseudo_consens	chr1	79957580	79958057	478	+	0	2	1	2	1	2	1	1	3	1	0	0	0	0	6	3	1
ENSMUSG00000096297	snRNA	Gm23934		chr1	80135466	80135572	107	+	0	0	0	0	0	0	0	0	0	0	2	0	1	1	0	0	0
ENSMUSG00000102518	TEC	Gm38339		chr1	80146973	80148801	1829	-	0	0	0	0	0	0	0	1	1	0	0	0	0	0	0	0	0
ENSMUSG00000099552	lncRNA	9830004L10Rik		chr1	80184719	80192073	7355	+	0	1	2	0	1	0	1	0	3	1	2	0	0	0	0	0	0
ENSMUSG00000043230	protein_coding	Fam124b		chr1	80198706	80218473	19768	-	49	43	97	64	36	38	49	38	57	35	41	49	48	46	54	36	33
ENSMUSG00000101257	lncRNA	2310015K22Rik		chr1	80225044	80228792	3749	+	22	23	45	58	12	11	20	27	37	27	21	21	42	27	42	25	26
ENSMUSG00000103404	TEC	Gm37932		chr1	80255031	80256197	1167	-	0	1	0	0	0	0	0	0	0	0	0	2	0	0	0	0	0
ENSMUSG00000004364	protein_coding	Cul3	overlapping_locus	chr1	80264923	80340480	75558	-	4076	4289	5187	5361	4286	3892	4185	3927	4187	4027	4413	3702	5159	3596	4428	4223	3669
ENSMUSG00000103076	TEC	Gm37902	overlapping_locus	chr1	80274731	80276413	1683	-	7	9	17	14	7	8	8	12	7	3	5	9	11	10	8	13	13
ENSMUSG00000103525	TEC	Gm37262		chr1	80326177	80327994	1818	-	0	0	0	0	0	0	0	0	1	1	0	2	1	2	1	0	0
ENSMUSG00000101722	lncRNA	Gm29125		chr1	80382822	80386251	3430	+	4	4	7	7	2	0	2	2	0	1	2	1	5	0	0	2	3
ENSMUSG00000101483	lncRNA	1700016L21Rik		chr1	80445932	80479867	33936	+	1	0	0	0	1	0	0	0	0	0	0	0	0	0	0	0	1
ENSMUSG00000038608	protein_coding	Dock10	overlapping_locus	chr1	80501073	80758527	257455	-	138	189	165	274	128	127	204	133	196	147	163	249	263	206	220	169	192
ENSMUSG00000103192	TEC	Gm37645	overlapping_locus	chr1	80666009	80669564	3556	-	0	0	0	0	0	0	0	0	0	2	0	0	0	0	0	0	0
ENSMUSG00000104488	TEC	Gm38062	overlapping_locus	chr1	80728809	80730664	1856	-	1	0	1	0	0	0	0	0	0	0	0	0	0	0	0	0	0
ENSMUSG00000102721	TEC	A630081D01Rik	overlapping_locus	chr1	80747222	80749054	1833	-	0	0	0	0	0	0	0	0	0	0	0	0	0	0	1	0	0
ENSMUSG00000099949	processed_pseudogene	Gm29124	pseudo_consens	chr1	80897654	80898105	452	-	3	0	1	3	4	0	3	1	1	7	7	0	1	4	4	3	3
ENSMUSG00000054976	protein_coding	Nyap2		chr1	81076950	81341764	264815	+	0	0	1	0	0	1	0	0	0	0	0	0	0	0	2	1	0
ENSMUSG00000101986	processed_pseudogene	Gm6198	pseudo_consens	chr1	81554157	81557483	3327	-	0	0	1	0	0	1	0	0	0	0	0	0	1	0	0	1	0
ENSMUSG00000087008	processed_pseudogene	Gm5530	pseudo_consens	chr1	81741985	81742969	985	-	1	0	0	0	0	0	0	0	0	0	0	0	0	0	0	0	2
ENSMUSG00000100561	processed_pseudogene	Gm7516	pseudo_consens	chr1	81797241	81797946	706	+	5	1	3	2	1	2	3	2	5	3	2	1	1	2	3	4	3
ENSMUSG00000103571	TEC	Gm37114		chr1	82105180	82106983	1804	+	0	0	1	0	0	0	0	0	0	0	0	0	0	0	0	0	0
ENSMUSG00000055980	protein_coding	Irs1		chr1	82233101	82291416	58316	-	324	601	757	570	394	375	465	422	455	417	373	500	582	414	512	568	546
ENSMUSG00000026142	protein_coding	Rhbdd1	overlapping_locus	chr1	82316452	82445366	128915	+	639	747	873	871	700	673	701	646	759	676	688	618	756	630	805	648	693
ENSMUSG00000104493	TEC	Gm19552	overlapping_locus	chr1	82352217	82355049	2833	+	0	1	0	1	0	0	0	0	0	0	4	0	2	0	0	0	0
ENSMUSG00000100786	lncRNA	Gm28940	ncRNA_host	chr1	82392493	82402746	10254	-	0	1	0	0	0	0	0	0	0	0	0	1	0	0	0	0	0
ENSMUSG00000067158	protein_coding	Col4a4		chr1	82448423	82586849	138427	-	92	99	77	145	99	86	105	95	101	86	101	102	115	91	148	103	81
ENSMUSG00000079465	protein_coding	Col4a3	ncRNA_host	chr1	82586921	82722059	135139	+	38	77	39	91	44	39	40	51	47	51	47	53	61	50	70	63	52
ENSMUSG00000065055	rRNA	n-R5s213		chr1	82635013	82635110	98	+	1	0	0	0	0	0	0	0	0	1	0	0	0	0	0	0	0
ENSMUSG00000097564	lncRNA	C430014B12Rik		chr1	82691928	82725169	33242	-	0	0	3	1	0	1	2	0	1	2	1	0	1	0	2	2	1
ENSMUSG00000026150	protein_coding	Mff	overlapping_locus	chr1	82724890	82752394	27505	+	1781	1654	1772	2318	1844	1842	1976	1885	2203	1737	1868	1635	1816	1804	1735	1745	1508
ENSMUSG00000101450	lncRNA	Gm28941	overlapping_locus	chr1	82739691	82740707	1017	+	15	7	16	18	18	7	19	15	15	15	11	13	19	13	18	20	22
ENSMUSG00000026149	protein_coding	Tm4sf20		chr1	82756649	82768461	11813	-	0	0	1	1	0	0	0	0	0	0	0	0	3	0	1	0	0
ENSMUSG00000114299	protein_coding	Gm47791		chr1	82770824	82771243	420	-	11	19	12	4	11	14	7	0	9	5	31	8	18	2	17	18	1
ENSMUSG00000100170	lncRNA	Gm28942		chr1	82819835	82820377	543	+	1	1	0	1	1	0	2	0	0	1	1	1	0	3	0	0	0
ENSMUSG00000100744	processed_pseudogene	Gm17764	pseudo_consens	chr1	82822471	82822861	391	-	3	4	1	2	0	3	0	1	0	2	3	0	4	0	0	1	2
ENSMUSG00000026159	protein_coding	Agfg1		chr1	82839483	82901182	61700	+	1353	1686	2121	1841	1374	1303	1575	1357	1417	1373	1493	1487	1871	1504	1658	1530	1395
ENSMUSG00000113880	protein_coding	A030005L19Rik		chr1	82913325	82914130	806	+	64	62	44	18	50	43	42	13	28	26	141	31	80	17	49	60	25
ENSMUSG00000113973	protein_coding	A030014E15Rik		chr1	82924917	82925712	796	+	67	89	67	14	94	39	42	25	38	54	158	58	126	23	52	93	35
ENSMUSG00000113846	protein_coding	Gm6217		chr1	82930571	82931399	829	-	20	23	12	10	15	10	5	5	11	11	60	11	38	4	13	28	8
ENSMUSG00000113084	protein_coding	A030003K21Rik		chr1	82942559	82943388	830	-	3	3	1	1	6	0	0	2	5	0	7	0	0	0	2	0	2
ENSMUSG00000113925	protein_coding	Gm7544		chr1	82955186	82956013	828	-	13	21	11	2	34	13	11	9	11	16	42	17	31	4	15	18	8
ENSMUSG00000114011	protein_coding	Gm47955		chr1	82960286	82960924	639	+	5	12	4	0	12	7	3	4	5	8	24	7	21	1	8	5	2
ENSMUSG00000113097	protein_coding	Gm47959		chr1	83000548	83001480	933	+	35	31	27	3	40	25	27	6	25	32	94	28	50	4	35	34	11
ENSMUSG00000101784	processed_pseudogene	Gm7553	pseudo_consens	chr1	83003482	83004907	1426	-	1	1	1	1	3	2	1	1	4	1	1	2	1	3	2	2	0
ENSMUSG00000038496	protein_coding	Slc19a3		chr1	83012523	83038448	25926	-	128	169	142	151	158	122	186	138	183	139	133	118	158	176	153	135	141
ENSMUSG00000100432	processed_pseudogene	Gm7539	pseudo_consens	chr1	83015393	83016022	630	+	0	0	1	1	1	1	1	1	1	1	1	2	2	0	1	1	1
ENSMUSG00000100190	protein_coding	Krtap28-10		chr1	83041524	83042480	957	-	89	86	82	23	95	48	80	26	82	61	171	67	155	27	73	77	43
ENSMUSG00000113267	protein_coding	Gm47969		chr1	83044932	83045946	1015	+	33	64	44	11	74	24	33	11	28	43	115	24	74	11	55	37	10
ENSMUSG00000104423	protein_coding	A030005K14Rik		chr1	83058286	83059378	1093	-	62	90	50	21	95	35	51	25	44	54	143	48	127	18	57	81	36
ENSMUSG00000101315	protein_coding	Krtap28-13		chr1	83060930	83061921	992	+	87	84	85	14	82	56	71	18	62	73	171	66	129	21	66	96	34
ENSMUSG00000026166	protein_coding	Ccl20		chr1	83116766	83119167	2402	+	23	15	29	21	6	42	34	21	21	43	20	33	41	24	28	24	23
ENSMUSG00000101173	processed_pseudogene	Gm29519		chr1	83157984	83159017	1034	+	0	1	0	2	0	0	1	0	0	0	1	0	0	0	0	0	0
ENSMUSG00000053161	protein_coding	Daw1		chr1	83159752	83210574	50823	+	1	1	0	0	1	1	1	0	2	0	1	1	1	0	0	0	0
ENSMUSG00000101896	processed_pseudogene	Gm6244	pseudo_consens	chr1	83212044	83212884	841	-	0	0	0	0	0	0	1	1	0	0	0	0	0	0	0	0	0
ENSMUSG00000026163	protein_coding	Sphkap	overlapping_locus	chr1	83254139	83408200	154062	-	10	11	13	11	10	18	14	7	8	12	13	10	12	8	9	9	9
ENSMUSG00000079140	processed_pseudogene	Gm6374	overlapping_locus	chr1	83314513	83315300	788	+	0	1	0	0	0	0	0	0	1	0	0	0	0	0	0	0	0
ENSMUSG00000045658	protein_coding	Pid1	overlapping_locus	chr1	84036296	84364180	327885	-	213	246	218	340	252	215	254	285	244	247	284	255	326	248	349	259	288
ENSMUSG00000102750	TEC	Gm37058	overlapping_locus	chr1	84132867	84134510	1644	-	0	0	0	0	0	0	1	0	0	0	0	0	0	0	0	0	0
ENSMUSG00000101934	processed_pseudogene	Gm18304	pseudo_consens	chr1	84168188	84168733	546	+	0	0	0	0	0	0	0	0	0	0	1	0	0	0	0	0	0
ENSMUSG00000036766	protein_coding	Dner	overlapping_locus	chr1	84369839	84696221	326383	-	8	8	1	9	13	8	7	6	5	12	4	7	11	5	9	4	4
ENSMUSG00000102481	TEC	Gm37925	overlapping_locus	chr1	84665189	84669443	4255	-	0	0	0	0	0	0	0	0	0	0	0	0	1	0	0	0	0
ENSMUSG00000026219	protein_coding	Trip12	overlapping_locus	chr1	84721189	84840516	119328	-	3971	5508	6341	6009	4800	4181	4981	4067	4307	4463	4616	4705	6036	4055	4980	4670	4259
ENSMUSG00000103505	TEC	Gm38374	overlapping_locus	chr1	84807158	84809190	2033	-	0	2	2	0	0	1	0	2	0	0	0	0	0	0	0	2	1
ENSMUSG00000104503	TEC	Gm37738	overlapping_locus	chr1	84819968	84824683	4716	-	0	4	0	0	0	0	1	1	0	2	0	0	2	0	3	3	0
ENSMUSG00000073633	protein_coding	Fbxo36		chr1	84839841	84900487	60647	+	88	78	61	127	115	88	92	94	103	85	75	83	93	104	85	96	78
ENSMUSG00000026220	protein_coding	Slc16a14		chr1	84905898	84935134	29237	-	187	226	482	222	190	185	203	153	205	185	181	176	263	155	219	237	183
ENSMUSG00000099693	unprocessed_pseudogene	Gm29284	overlapping_locus	chr1	84990638	84993032	2395	-	1	0	0	0	0	0	2	0	0	0	0	0	0	0	0	0	0
ENSMUSG00000052477	protein_coding	C130026I21Rik	overlapping_locus	chr1	84992690	85270566	277877	-	1	6	4	9	3	4	3	4	1	0	7	8	4	4	0	0	0
ENSMUSG00000064281	processed_pseudogene	Rpl19-ps1	overlapping_locus	chr1	85012114	85012704	591	+	3	3	1	6	3	6	0	3	1	3	1	5	7	6	4	2	2
ENSMUSG00000061852	unprocessed_pseudogene	Gm7582	overlapping_locus	chr1	85039065	85041958	2894	-	0	0	1	1	0	0	0	1	0	0	0	0	0	0	0	0	0
ENSMUSG00000089976	unprocessed_pseudogene	Gm2389	overlapping_locus	chr1	85061154	85062642	1489	+	0	0	0	2	0	0	0	0	0	0	0	0	0	0	0	0	0
ENSMUSG00000101279	unprocessed_pseudogene	Gm18342	overlapping_locus	chr1	85067394	85080236	12843	-	0	0	0	0	1	0	0	0	1	0	0	0	1	0	0	0	0
ENSMUSG00000089844	protein_coding	A530032D15Rik	overlapping_locus	chr1	85083069	85109853	26785	-	5	10	2	12	6	2	4	3	5	8	8	6	4	2	2	3	9
ENSMUSG00000072109	lncRNA	A530040E14Rik		chr1	85105946	85114035	8090	+	0	0	0	1	1	1	0	1	0	0	0	0	1	0	2	1	0
ENSMUSG00000091199	lncRNA	Gm2619		chr1	85308659	85327285	18627	-	0	3	0	0	0	0	1	0	0	1	2	1	0	0	1	0	1
ENSMUSG00000079457	protein_coding	Gm7609	overlapping_locus	chr1	85199613	85213786	14174	+	0	0	0	1	1	0	0	0	1	2	0	0	0	0	0	0	0
ENSMUSG00000090252	lncRNA	Gm16028		chr1	85246851	85255465	8615	+	0	0	0	0	0	0	0	0	0	0	0	0	0	0	1	0	0
ENSMUSG00000079455	transcribed_unprocessed_pseudogene	Gm16026		chr1	85266698	85285491	18794	+	4	0	2	1	0	0	0	0	2	1	1	3	5	0	1	2	1
ENSMUSG00000101751	unprocessed_pseudogene	Gm2427		chr1	85501090	85514604	13515	+	0	0	0	0	0	0	0	0	1	0	1	1	0	0	0	0	0
ENSMUSG00000089714	lncRNA	Gm16092		chr1	85511133	85527161	16029	-	2	0	1	1	0	0	0	0	0	1	1	1	3	0	0	0	0
ENSMUSG00000090186	unprocessed_pseudogene	Gm7592		chr1	85156812	85157699	888	-	3	5	6	4	3	1	4	3	3	2	6	4	7	8	4	3	2
ENSMUSG00000070034	protein_coding	Sp110		chr1	85576899	85598817	21919	-	34	42	26	51	24	16	34	29	23	24	43	51	41	27	27	27	24
ENSMUSG00000070031	protein_coding	Sp140		chr1	85600378	85645037	44660	+	10	8	6	11	5	2	7	9	9	9	13	18	13	5	5	2	7
ENSMUSG00000073628	lncRNA	Gm10552		chr1	85604085	85611896	7812	-	0	0	0	0	0	0	1	0	0	0	0	0	0	0	0	0	0
ENSMUSG00000090246	lncRNA	Gm17017		chr1	85641222	85650585	9364	-	1	0	1	2	0	0	0	0	0	0	0	0	1	0	0	1	0
ENSMUSG00000026222	protein_coding	Sp100	ncRNA_host	chr1	85649988	85709998	60011	+	198	226	151	273	113	126	127	118	148	171	248	256	234	184	151	178	160
ENSMUSG00000052760	protein_coding	A630001G21Rik		chr1	85717083	85778643	61561	-	13	15	6	19	10	6	5	5	11	13	7	10	13	15	10	7	15
ENSMUSG00000100217	lncRNA	9930111H07Rik		chr1	85775271	85784694	9424	+	0	2	0	1	2	0	0	0	0	0	0	0	1	0	0	0	0
ENSMUSG00000092932	misc_RNA	Gm22906		chr1	85784713	85784962	250	+	0	0	0	0	0	0	1	0	0	0	0	0	0	0	0	0	0
ENSMUSG00000036707	protein_coding	Cab39		chr1	85793441	85851576	58136	+	3706	4665	4849	4961	4701	4309	4835	4081	4038	4176	4173	3864	4902	3574	4047	3893	3465
ENSMUSG00000026223	protein_coding	Itm2c		chr1	85894281	85908675	14395	+	1745	2364	1805	2313	2218	1986	2230	2260	2105	2068	2018	2006	2087	2036	2651	1944	2029
ENSMUSG00000026224	protein_coding	4933407L21Rik		chr1	85928483	85940624	12142	+	2	0	2	3	0	0	1	2	0	2	2	1	2	1	2	0	2
ENSMUSG00000099767	lncRNA	Gm28884		chr1	85933247	85937332	4086	-	0	0	0	0	0	0	0	0	0	1	0	0	1	0	0	0	0
ENSMUSG00000049608	protein_coding	Gpr55		chr1	85938318	85961007	22690	-	4	7	7	5	0	5	1	3	3	3	4	5	7	4	1	7	3
ENSMUSG00000100108	lncRNA	Gm28100		chr1	85972365	85986917	14553	-	0	0	0	0	0	0	1	0	0	0	0	1	0	0	0	0	0
ENSMUSG00000099342	processed_pseudogene	Gm18180		chr1	86014403	86015886	1484	-	8	3	9	13	12	9	6	3	10	6	11	8	10	7	10	5	8
ENSMUSG00000026226	protein_coding	Spata3		chr1	86016816	86029958	13143	+	0	0	0	1	1	0	0	0	0	0	0	1	1	0	1	0	0
ENSMUSG00000026227	protein_coding	2810459M11Rik		chr1	86045863	86055456	9594	+	1	6	1	8	6	2	3	5	9	6	8	2	2	5	6	7	1
ENSMUSG00000026229	protein_coding	Psmd1	overlapping_locus	chr1	86064387	86139151	74765	+	2443	3119	4029	3140	3066	2537	2932	2724	2759	2614	2480	2401	3194	2332	2748	2587	2538
ENSMUSG00000026228	protein_coding	Htr2b		chr1	86099026	86111970	12945	-	3	7	5	8	4	2	3	1	5	2	2	7	5	5	3	3	3
ENSMUSG00000103272	TEC	Gm37914	overlapping_locus	chr1	86120883	86123561	2679	+	1	1	0	4	1	3	0	2	2	2	1	0	4	2	0	2	0
ENSMUSG00000062590	protein_coding	Armc9	overlapping_locus	chr1	86154780	86278284	123505	+	162	201	200	226	162	146	183	153	172	158	133	163	178	157	171	152	167
ENSMUSG00000087538	lncRNA	Gm16341		chr1	86275509	86301375	25867	-	1	1	0	1	0	0	0	1	0	0	0	0	0	0	1	1	0
ENSMUSG00000079445	protein_coding	B3gnt7		chr1	86302832	86307305	4474	+	23	46	30	26	32	35	45	45	41	44	22	47	38	26	49	41	40
ENSMUSG00000091806	processed_pseudogene	Gm5258	pseudo_consens	chr1	86323267	86323593	327	+	0	0	0	0	0	0	0	0	0	1	0	0	0	0	0	1	0
ENSMUSG00000101853	processed_pseudogene	Gm28627	pseudo_consens	chr1	86328039	86328873	835	+	1	0	0	0	0	0	0	0	0	0	0	0	0	0	0	0	0
ENSMUSG00000026234	protein_coding	Ncl	ncRNA_host	chr1	86344719	86359400	14682	-	9794	13550	17752	12404	13105	11635	11788	10795	9482	10682	10328	10493	12450	8461	10870	10245	9606
ENSMUSG00000104627	miRNA	Mir3535		chr1	86351981	86352127	147	-	0	0	0	4	0	1	0	0	0	1	0	0	0	1	0	0	0
ENSMUSG00000064823	snoRNA	Snord82		chr1	86356261	86356330	70	-	1	0	0	0	0	0	0	0	0	0	0	0	0	0	1	0	0
ENSMUSG00000073627	lncRNA	C130036L24Rik		chr1	86359574	86373791	14218	+	42	61	60	60	43	54	44	39	58	46	37	42	42	55	52	54	39
ENSMUSG00000110510	processed_pseudogene	Gm45908		chr1	86377100	86378276	1177	-	0	0	0	0	0	2	0	0	0	0	1	1	0	0	2	2	0
ENSMUSG00000026237	protein_coding	Nmur1		chr1	86386303	86426228	39926	-	3	3	3	1	3	0	0	2	2	3	3	3	0	1	2	2	1
ENSMUSG00000036574	protein_coding	Tex44		chr1	86426329	86428052	1724	+	1	0	0	0	0	1	0	0	0	0	0	0	0	0	0	0	0
ENSMUSG00000101328	processed_pseudogene	Rpl30-ps6	pseudo_consens	chr1	86473659	86474006	348	+	0	0	0	0	0	1	0	0	0	0	0	1	0	0	0	0	0
ENSMUSG00000026238	protein_coding	Ptma		chr1	86526726	86530712	3987	+	2365	2387	3320	2377	1949	2403	2671	2290	2402	2157	1811	1992	2555	2193	2772	2312	1914
ENSMUSG00000026239	protein_coding	Pde6d		chr1	86542994	86582629	39636	-	301	315	334	371	337	310	339	367	416	370	336	359	309	404	396	378	358
ENSMUSG00000102927	TEC	Gm37152		chr1	86580058	86581232	1175	+	1	0	1	0	1	0	0	0	3	0	0	0	1	1	2	1	1
ENSMUSG00000026240	protein_coding	Cops7b		chr1	86582904	86609375	26472	+	299	315	347	369	252	238	256	277	288	282	262	255	353	317	265	292	267
ENSMUSG00000103609	TEC	Gm37022		chr1	86638201	86640454	2254	+	1	0	3	1	1	0	0	0	0	0	0	0	1	2	0	0	0
ENSMUSG00000026241	protein_coding	Nppc		chr1	86666291	86670571	4281	-	6	4	5	5	5	4	5	5	1	6	6	5	7	4	8	4	7
ENSMUSG00000053333	protein_coding	Dis3l2	overlapping_locus	chr1	86703808	87050095	346288	+	528	716	753	707	654	553	627	607	548	507	584	495	678	484	612	509	510
ENSMUSG00000100225	processed_pseudogene	Gm29097	overlapping_locus	chr1	86764944	86765365	422	-	0	0	0	0	0	0	2	0	0	0	0	0	0	0	0	0	0
ENSMUSG00000100768	lncRNA	Gm29055	overlapping_locus	chr1	86774819	86776528	1710	+	0	0	0	0	0	0	0	0	0	0	0	1	0	0	0	0	0
ENSMUSG00000104121	TEC	Gm37485	overlapping_locus	chr1	86801075	86804027	2953	+	0	0	1	1	0	0	0	0	0	1	1	2	0	0	0	0	0
ENSMUSG00000102383	TEC	Gm38142	overlapping_locus	chr1	86826101	86829655	3555	+	0	0	0	0	0	0	0	0	0	0	0	0	0	0	0	0	0
ENSMUSG00000104400	TEC	Gm38010	overlapping_locus	chr1	86834995	86837778	2784	+	0	1	0	0	0	0	0	0	0	0	0	1	2	0	1	0	0
ENSMUSG00000102293	TEC	Gm37541	overlapping_locus	chr1	86874350	86876664	2315	+	0	0	1	1	0	0	0	2	0	0	0	2	0	0	0	1	0
ENSMUSG00000102649	TEC	Gm38021	overlapping_locus	chr1	86893573	86895132	1560	+	4	3	1	3	6	3	2	6	4	1	2	9	3	1	2	0	2
ENSMUSG00000084106	processed_pseudogene	Gm6136		chr1	86908793	86909683	891	-	28	27	17	18	25	20	22	28	37	26	31	21	20	32	35	20	20
ENSMUSG00000102571	TEC	Gm37967	overlapping_locus	chr1	86917992	86920656	2665	+	2	3	2	1	0	0	2	0	1	2	1	5	0	1	3	6	1
ENSMUSG00000099401	lncRNA	Gm28375		chr1	86929387	87057596	128210	-	0	0	0	0	0	0	0	0	0	0	0	0	0	0	0	0	0
ENSMUSG00000102956	TEC	Gm37017	overlapping_locus	chr1	86988270	86989016	747	+	2	1	1	1	1	1	0	1	0	0	2	0	1	0	0	1	1
ENSMUSG00000103984	TEC	Gm37447	overlapping_locus	chr1	87036723	87039650	2928	+	22	17	15	28	11	12	19	10	11	5	6	19	14	9	15	13	17
ENSMUSG00000101940	transcribed_unprocessed_pseudogene	Akp-ps1		chr1	87067672	87071098	3427	+	5	9	4	20	9	11	16	6	9	13	9	11	7	14	16	20	10
ENSMUSG00000026246	protein_coding	Alppl2		chr1	87086694	87089928	3235	-	0	0	0	1	0	0	0	0	0	0	0	0	0	0	0	0	0
ENSMUSG00000099839	lncRNA	Gm29374		chr1	87142874	87146983	4110	-	0	0	0	0	0	0	0	0	0	0	0	0	0	0	1	0	0
ENSMUSG00000026247	protein_coding	Ecel1		chr1	87147655	87156521	8867	-	1	1	6	1	2	5	0	1	1	4	6	4	2	4	3	2	2
ENSMUSG00000026251	protein_coding	Chrnd		chr1	87190607	87200070	9464	+	75	116	97	136	128	124	98	114	94	74	86	73	111	90	74	124	73
ENSMUSG00000026253	protein_coding	Chrng		chr1	87204657	87212694	8038	+	5	4	2	5	5	8	2	5	4	5	9	2	2	3	0	1	3
ENSMUSG00000026254	protein_coding	Eif4e2		chr1	87213914	87240488	26575	+	1308	1347	1532	1442	1260	1252	1382	1223	1483	1265	1281	1115	1277	1250	1342	1277	1106
ENSMUSG00000088318	snRNA	Gm26187		chr1	87251148	87251248	101	+	0	2	0	0	0	0	0	0	0	1	2	0	0	1	0	0	0
ENSMUSG00000026255	protein_coding	Efhd1		chr1	87264363	87310839	46477	+	103	134	96	95	123	113	122	117	95	114	110	128	149	115	150	119	108
ENSMUSG00000048000	protein_coding	Gigyf2		chr1	87326998	87450796	123799	+	1019	1331	1741	1525	1190	1038	1201	1001	1139	1137	1142	1257	1459	1135	1327	1339	1166
ENSMUSG00000079436	protein_coding	Kcnj13		chr1	87386363	87394729	8367	-	1	5	2	9	10	5	11	12	1	9	11	9	15	4	8	2	8
ENSMUSG00000089613	snRNA	Gm23504		chr1	87415255	87415349	95	-	0	0	0	0	0	0	0	0	0	1	0	0	0	0	0	0	0
ENSMUSG00000026258	protein_coding	Snorc		chr1	87470271	87475482	5212	+	486	594	376	477	542	559	475	534	574	549	727	516	406	539	779	571	486
ENSMUSG00000026259	protein_coding	Ngef	overlapping_locus	chr1	87476834	87573870	97037	-	274	295	406	336	239	226	280	233	239	331	298	251	377	253	298	277	220
ENSMUSG00000079434	protein_coding	Neu2	overlapping_locus	chr1	87509889	87597845	87957	+	40	72	58	66	68	64	55	79	95	52	55	42	70	62	82	105	67
ENSMUSG00000091123	processed_pseudogene	Gm17181	overlapping_locus	chr1	87514175	87514297	123	+	1	0	0	0	0	0	0	0	1	0	0	0	0	0	0	0	0
ENSMUSG00000090994	processed_pseudogene	Gm6153	overlapping_locus	chr1	87543635	87544692	1058	-	0	1	1	0	2	1	0	0	1	0	1	1	4	0	0	2	0
ENSMUSG00000026288	protein_coding	Inpp5d		chr1	87620312	87720507	100196	+	225	304	308	359	239	201	295	177	225	211	248	294	387	256	325	253	292
ENSMUSG00000026289	protein_coding	Atg16l1	ncRNA_host	chr1	87755870	87792428	36559	+	701	803	795	989	786	705	833	708	788	662	726	794	889	758	840	812	701
ENSMUSG00000087968	scaRNA	Gm25395		chr1	87776938	87777209	272	+	0	0	0	1	0	0	2	0	1	1	0	0	2	4	1	2	1
ENSMUSG00000089281	scaRNA	Scarna6		chr1	87784556	87784820	265	+	1	0	1	3	3	1	2	1	2	0	1	2	0	2	0	1	0
ENSMUSG00000056055	protein_coding	Sag		chr1	87803680	87845158	41479	+	16	24	16	18	21	21	33	21	26	23	20	32	19	29	59	23	18
ENSMUSG00000070738	protein_coding	Dgkd	overlapping_locus	chr1	87853287	87945180	91894	+	834	1162	1015	1329	1088	985	1161	945	1019	1038	944	1079	1226	944	1094	1158	1043
ENSMUSG00000101942	lncRNA	Gm19582		chr1	87853347	87854299	953	-	1	0	0	0	0	0	0	1	0	0	1	1	1	1	1	0	2
ENSMUSG00000103996	TEC	4833421G17Rik	overlapping_locus	chr1	87865073	87865916	844	+	0	0	0	0	0	0	0	0	0	0	0	0	0	0	0	0	1
ENSMUSG00000103591	TEC	Gm38365	overlapping_locus	chr1	87897540	87900532	2993	+	2	0	1	0	3	0	0	0	0	0	0	0	2	0	0	0	0
ENSMUSG00000005501	protein_coding	Usp40		chr1	87945119	88008551	63433	-	433	479	707	670	429	406	483	427	513	517	455	531	623	516	558	512	512
ENSMUSG00000084021	processed_pseudogene	Gm5832	pseudo_consens	chr1	88022381	88023962	1582	+	1	0	0	0	0	0	1	0	0	0	0	0	0	0	0	0	0
ENSMUSG00000089675	protein_coding	Ugt1a8	overlapping_locus	chr1	88087813	88219004	131192	+	0	0	0	0	1	0	1	0	1	0	0	1	1	0	0	1	0
ENSMUSG00000090124	protein_coding	Ugt1a7c	overlapping_locus	chr1	88095062	88220002	124941	+	40	49	36	63	45	34	38	39	47	45	42	56	56	52	42	43	46
ENSMUSG00000090145	protein_coding	Ugt1a6b	overlapping_locus	chr1	88103252	88219003	115752	+	11	6	9	13	15	7	9	10	16	8	9	7	12	8	17	18	8
ENSMUSG00000084195	unprocessed_pseudogene	Gm15372	overlapping_locus	chr1	88126776	88127609	834	+	0	0	0	0	0	0	0	0	0	0	1	1	0	0	0	0	0
ENSMUSG00000081261	unprocessed_pseudogene	Gm15370	overlapping_locus	chr1	88129581	88129833	253	+	0	0	0	0	0	0	0	0	0	0	0	0	0	0	0	0	0
ENSMUSG00000054545	protein_coding	Ugt1a6a	overlapping_locus	chr1	88134809	88218997	84189	+	53	56	64	84	38	41	84	56	59	40	47	62	64	63	50	65	74
ENSMUSG00000081602	unprocessed_pseudogene	Gm15369	overlapping_locus	chr1	88146376	88146769	394	+	0	0	0	0	0	0	0	0	0	0	0	0	0	0	0	0	0
ENSMUSG00000082513	unprocessed_pseudogene	Gm15374	overlapping_locus	chr1	88151038	88151881	844	+	0	1	1	0	0	0	1	1	0	1	0	0	1	0	1	0	0
ENSMUSG00000082677	unprocessed_pseudogene	Gm15371	overlapping_locus	chr1	88153788	88154571	784	+	0	1	0	1	0	0	0	0	0	0	0	1	0	1	0	0	0
ENSMUSG00000089943	protein_coding	Ugt1a5	overlapping_locus	chr1	88166012	88218997	52986	+	0	1	1	0	1	0	0	1	0	0	0	3	0	0	0	4	0
ENSMUSG00000081488	unprocessed_pseudogene	Gm15368	overlapping_locus	chr1	88186662	88187519	858	+	0	0	0	1	0	0	1	1	1	1	0	0	2	1	0	3	5
ENSMUSG00000083277	unprocessed_pseudogene	Gm15376	overlapping_locus	chr1	88191901	88192683	783	+	0	0	0	0	0	0	0	1	0	0	0	3	0	0	0	0	0
ENSMUSG00000090171	protein_coding	Ugt1a2	overlapping_locus	chr1	88200601	88218997	18397	+	0	0	0	0	0	1	0	1	0	0	0	0	1	1	0	1	0
ENSMUSG00000081984	protein_coding	Dnajb3	overlapping_locus	chr1	88204732	88205782	1051	-	113	95	119	71	97	96	137	140	112	128	127	92	114	80	131	95	95
ENSMUSG00000089960	protein_coding	Ugt1a1	overlapping_locus	chr1	88211959	88218997	7039	+	574	608	741	654	719	598	709	670	694	598	563	511	674	618	580	611	580
ENSMUSG00000079429	protein_coding	Mroh2a		chr1	88226986	88262289	35304	+	46	62	72	87	67	60	46	46	48	41	71	56	48	62	70	64	54
ENSMUSG00000044783	protein_coding	Hjurp		chr1	88262471	88277633	15163	-	1657	2328	2410	2655	2191	1827	2226	1757	2089	1613	1567	1891	2143	1949	2045	1918	1867
ENSMUSG00000036251	protein_coding	Trpm8		chr1	88277661	88389293	111633	+	1	3	0	2	2	1	1	3	1	1	1	0	4	1	1	2	0
ENSMUSG00000026295	protein_coding	Spp2		chr1	88406961	88426438	19478	+	0	0	0	1	0	0	0	0	0	1	1	0	2	0	0	1	0
ENSMUSG00000099553	lncRNA	Gm29538		chr1	88443969	88462608	18640	-	7	12	8	9	8	13	14	19	15	7	18	8	8	6	9	7	8
ENSMUSG00000100908	lncRNA	Gm28888		chr1	88459683	88465558	5876	+	0	0	0	1	0	0	0	0	0	0	0	0	0	0	0	0	0
ENSMUSG00000062310	protein_coding	Glrp1		chr1	88499871	88510066	10196	-	7	5	12	7	4	1	5	9	1	6	1	1	5	4	3	3	2
ENSMUSG00000100798	lncRNA	Gm19589		chr1	88551517	88562167	10651	+	1	2	4	5	3	2	3	1	2	1	1	2	5	0	3	3	3
ENSMUSG00000104057	TEC	Gm38130		chr1	88653085	88654845	1761	+	0	0	0	0	0	0	0	0	0	1	0	1	0	0	0	0	1
ENSMUSG00000100367	lncRNA	Gm29336		chr1	88656308	88658100	1793	+	2	3	0	4	3	0	3	3	2	2	2	0	7	3	2	3	1
ENSMUSG00000049866	protein_coding	Arl4c		chr1	88673125	88702221	29097	-	2256	2904	2945	2599	2706	2576	2831	2835	2266	2221	2439	2646	2930	2410	2725	2618	2297
ENSMUSG00000101736	processed_pseudogene	Gm29335	pseudo_consens	chr1	88722366	88722824	459	-	0	0	0	0	0	0	1	0	0	0	0	0	0	0	0	0	0
ENSMUSG00000097398	lncRNA	Platr5		chr1	88754890	88755736	847	+	1	1	0	0	0	1	2	0	0	0	1	0	0	1	1	1	1
ENSMUSG00000099378	lncRNA	1700067G17Rik		chr1	89016113	89022210	6098	+	0	0	0	0	0	0	0	1	1	0	0	0	0	0	0	0	0
ENSMUSG00000036206	protein_coding	Sh3bp4	overlapping_locus	chr1	89070415	89155068	84654	+	369	540	576	472	483	473	473	438	405	492	456	513	557	455	529	461	437
ENSMUSG00000102700	TEC	Gm38312	overlapping_locus	chr1	89097073	89098818	1746	+	1	1	1	1	2	0	2	1	3	2	3	3	2	4	1	3	2
ENSMUSG00000102083	processed_pseudogene	Gm5259	pseudo_consens	chr1	89256182	89256981	800	-	1	1	3	1	0	5	1	1	6	4	2	2	2	3	3	3	0
ENSMUSG00000101288	lncRNA	Gm28342		chr1	89302719	89358144	55426	-	0	0	0	0	0	0	0	0	0	0	1	1	0	0	0	0	0
ENSMUSG00000055013	protein_coding	Agap1	overlapping_locus	chr1	89454806	89897617	442812	+	507	750	712	711	702	684	746	625	568	554	643	643	782	570	751	661	626
ENSMUSG00000104114	TEC	Gm37297	overlapping_locus	chr1	89483438	89485821	2384	+	0	0	0	0	0	0	0	0	0	0	0	1	0	0	0	0	0
ENSMUSG00000088371	rRNA	Gm25180		chr1	89563360	89563474	115	+	0	1	0	0	0	0	0	0	0	0	0	0	0	0	0	0	0
ENSMUSG00000101662	lncRNA	Gm28499	overlapping_locus	chr1	89568765	89576602	7838	+	0	0	0	0	0	0	0	2	0	2	0	0	0	0	2	2	0
ENSMUSG00000102009	lncRNA	4933400F21Rik		chr1	89650529	89683908	33380	-	3	0	0	1	0	0	0	0	0	0	1	0	2	0	0	0	1
ENSMUSG00000103252	TEC	Gm37521	overlapping_locus	chr1	89825481	89827525	2045	+	0	1	0	0	0	2	1	0	0	0	1	0	0	0	0	0	0
ENSMUSG00000034486	protein_coding	Gbx2		chr1	89927956	89931179	3224	-	0	0	0	1	0	0	0	3	0	0	0	0	1	1	0	0	0
ENSMUSG00000092627	lncRNA	D130058E05Rik		chr1	89930234	89933290	3057	+	0	1	0	0	0	0	1	2	2	3	0	0	0	1	1	0	0
ENSMUSG00000067081	protein_coding	Asb18		chr1	89950220	90014666	64447	-	2	9	2	19	19	8	10	12	22	11	9	10	10	14	12	12	7
ENSMUSG00000026301	protein_coding	Iqca		chr1	90042132	90153401	111270	-	1	0	0	1	1	0	0	1	2	1	1	1	1	0	1	1	0
ENSMUSG00000044337	protein_coding	Ackr3		chr1	90203980	90216751	12772	+	957	1223	1373	1252	1263	1247	1454	1383	1294	1142	1096	989	1083	1123	1224	1168	994
ENSMUSG00000104087	TEC	Gm38277		chr1	90227160	90228526	1367	-	0	0	2	0	0	0	0	0	0	1	0	0	0	0	0	1	0
ENSMUSG00000101951	lncRNA	Gm28721		chr1	90255276	90260120	4845	-	2	0	2	2	0	2	0	1	3	2	0	2	4	0	1	2	0
ENSMUSG00000101028	lncRNA	Gm28723		chr1	90280458	90283912	3455	+	1	2	0	2	1	1	2	1	3	1	7	3	3	2	2	3	0
ENSMUSG00000101997	lncRNA	Gm28722		chr1	90453394	90454501	1108	-	0	3	3	0	0	0	0	0	0	0	0	0	1	0	1	0	0
ENSMUSG00000103292	TEC	Gm35048		chr1	90520496	90523297	2802	+	0	1	0	2	0	0	0	0	0	0	0	2	0	0	0	0	0
ENSMUSG00000034432	protein_coding	Cops8		chr1	90602981	90613341	10361	+	1069	1258	1329	1326	1333	1218	1289	1087	1114	1140	1125	1089	1219	1143	1229	1158	1070
ENSMUSG00000056128	lncRNA	Gm9991		chr1	90675161	90679793	4633	+	0	1	2	2	1	0	3	2	1	0	1	0	1	4	2	2	0
ENSMUSG00000048126	protein_coding	Col6a3	overlapping_locus	chr1	90765923	90843971	78049	-	1615	3271	3802	2880	2182	1726	2184	1901	1792	1706	2787	2472	3502	2568	3471	2792	3046
ENSMUSG00000103061	TEC	Gm36970	overlapping_locus	chr1	90837275	90839133	1859	-	0	0	0	0	0	0	0	0	0	0	0	0	0	0	0	0	0
ENSMUSG00000026303	protein_coding	Mlph		chr1	90915085	90951142	36058	+	106	154	144	125	125	124	129	116	102	158	120	118	156	105	155	132	133
ENSMUSG00000026304	protein_coding	Rab17		chr1	90958133	90969661	11529	-	63	37	39	48	38	69	65	40	72	73	65	44	43	46	74	60	60
ENSMUSG00000026305	protein_coding	Lrrfip1		chr1	90998737	91128944	130208	+	1005	1253	1449	1309	1101	1056	1240	1054	1056	1210	1077	1203	1492	1113	1244	1278	1122
ENSMUSG00000070732	protein_coding	Rbm44		chr1	91145089	91170795	25707	+	0	0	1	2	0	0	0	0	0	0	0	0	0	0	0	0	0
ENSMUSG00000100018	processed_pseudogene	Gm7776	pseudo_consens	chr1	91171429	91172148	720	-	3	12	12	9	5	10	4	6	13	2	9	2	6	9	9	7	2
ENSMUSG00000034353	protein_coding	Ramp1		chr1	91179822	91225196	45375	+	503	589	377	557	685	660	590	662	756	600	655	471	477	666	519	753	514
ENSMUSG00000034343	protein_coding	Ube2f		chr1	91250304	91290337	40034	+	756	756	842	825	701	678	766	701	865	777	780	721	856	691	781	743	578
ENSMUSG00000083064	processed_pseudogene	Gm7785	pseudo_consens	chr1	91296045	91296936	892	+	20	24	17	15	23	21	28	16	27	18	19	23	17	16	24	12	16
ENSMUSG00000026307	protein_coding	Scly		chr1	91298338	91321075	22738	+	199	284	299	265	213	203	224	250	230	254	212	245	270	253	247	234	250
ENSMUSG00000090322	lncRNA	Gm17090		chr1	91305092	91321101	16010	-	2	0	0	1	1	0	0	2	1	0	0	0	2	0	1	0	0
ENSMUSG00000049515	protein_coding	Espnl		chr1	91322075	91348306	26232	+	1	3	7	11	11	6	8	7	1	3	2	2	3	8	5	9	6
ENSMUSG00000026308	protein_coding	Klhl30		chr1	91351016	91362416	11401	+	62	84	80	96	137	94	95	94	97	155	84	124	145	77	61	106	77
ENSMUSG00000047443	protein_coding	Erfe		chr1	91366430	91374217	7788	+	7	15	9	11	10	10	10	14	9	7	11	11	10	5	8	7	10
ENSMUSG00000026309	protein_coding	Ilkap		chr1	91373861	91398815	24955	-	933	1025	1044	1259	1060	1109	1159	1113	1152	1022	960	1109	1082	1124	1100	1100	990
ENSMUSG00000100253	lncRNA	1700020N18Rik		chr1	91404879	91406029	1151	-	2	3	3	3	1	1	1	3	1	6	3	1	1	6	5	1	1
ENSMUSG00000067071	protein_coding	Hes6		chr1	91411483	91414038	2556	-	375	374	363	471	403	383	378	412	505	434	449	389	366	423	439	402	346
ENSMUSG00000055866	protein_coding	Per2		chr1	91415982	91459324	43343	-	424	638	434	976	748	591	857	511	606	562	435	447	578	413	555	584	495
ENSMUSG00000101911	processed_pseudogene	Gm28381		chr1	91469906	91470098	193	-	0	0	0	0	0	1	0	0	0	0	0	0	0	0	0	0	0
ENSMUSG00000101958	processed_pseudogene	Gm19085	pseudo_consens	chr1	91487729	91490009	2281	-	0	0	0	0	0	0	0	0	0	0	0	0	0	0	0	0	0
ENSMUSG00000034292	protein_coding	Traf3ip1		chr1	91494647	91529307	34661	+	111	135	128	137	89	105	115	131	113	143	111	146	165	120	157	145	138
ENSMUSG00000026311	protein_coding	Asb1		chr1	91540544	91559589	19046	+	136	203	139	218	182	195	193	161	187	196	199	172	226	159	219	180	183
ENSMUSG00000101705	lncRNA	Gm28380		chr1	91611406	91624500	13095	+	0	0	0	0	0	0	0	0	0	0	0	0	0	0	0	0	0
ENSMUSG00000100980	lncRNA	Gm29100		chr1	91798528	91802937	4410	-	6	10	6	12	11	3	14	13	8	12	5	8	14	9	10	14	16
ENSMUSG00000007805	protein_coding	Twist2	overlapping_locus	chr1	91801461	91848028	46568	+	67	81	73	111	93	82	105	96	76	93	107	99	122	125	148	97	102
ENSMUSG00000101414	lncRNA	Gm29101	overlapping_locus	chr1	91822515	91823985	1471	+	3	5	1	9	4	2	1	3	2	0	3	3	4	8	6	1	2
ENSMUSG00000102745	TEC	Gm37600		chr1	91916260	91919551	3292	+	0	0	1	1	0	0	1	2	0	0	0	1	0	0	0	2	0
ENSMUSG00000026313	protein_coding	Hdac4	overlapping_locus	chr1	91928779	92195699	266921	-	574	895	917	814	816	721	783	656	586	667	683	761	886	590	750	709	663
ENSMUSG00000103101	TEC	Gm37048		chr1	91975987	91981564	5578	+	0	1	1	0	0	0	0	0	0	1	1	0	2	0	0	0	1
ENSMUSG00000102565	TEC	Gm37036	overlapping_locus	chr1	92019592	92022097	2506	-	0	0	1	0	0	0	0	0	0	0	0	1	0	0	0	0	0
ENSMUSG00000101265	lncRNA	Gm29099		chr1	92324510	92329888	5379	+	1	0	0	0	0	0	0	0	0	1	1	1	0	0	0	0	0
ENSMUSG00000026260	protein_coding	Ndufa10	ncRNA_host	chr1	92439010	92473860	34851	-	2673	3154	3607	3560	3475	3299	3296	3359	3191	2900	2760	2681	3022	2917	3110	3085	2746
ENSMUSG00000067064	protein_coding	Olfr1416		chr1	92475925	92485113	9189	-	1	0	0	0	0	0	0	1	0	0	0	0	0	0	0	0	0
ENSMUSG00000057464	protein_coding	Olfr1415		chr1	92489101	92496101	7001	-	0	0	0	0	0	0	0	0	0	0	0	1	0	0	0	0	0
ENSMUSG00000063583	protein_coding	Olfr1410		chr1	92605782	92614806	9025	+	0	0	0	0	1	2	1	1	0	0	0	0	1	2	0	0	1
ENSMUSG00000061616	protein_coding	Olfr12		chr1	92617788	92623412	5625	+	1	7	0	7	2	0	3	3	5	7	8	4	7	5	6	2	8
ENSMUSG00000073616	protein_coding	Cops9		chr1	92637145	92641985	4841	-	973	664	773	765	806	940	930	827	1118	771	947	663	603	939	966	854	697
ENSMUSG00000044055	protein_coding	Otos		chr1	92644218	92648841	4624	-	41	43	33	71	40	55	35	64	82	60	77	48	38	65	66	53	48
ENSMUSG00000100546	lncRNA	Gm29483		chr1	92714234	92717202	2969	-	2	6	2	4	0	1	0	6	0	4	2	2	2	1	1	0	3
ENSMUSG00000100781	lncRNA	Gm29481		chr1	92820958	92837896	16939	-	0	0	0	0	0	0	0	0	0	0	0	0	0	0	0	0	0
ENSMUSG00000034220	protein_coding	Gpc1	ncRNA_host	chr1	92831645	92860779	29135	+	1567	2441	2318	2066	2158	2141	2077	1965	1858	1903	1785	1855	2293	1626	1953	2167	1730
ENSMUSG00000101995	lncRNA	Gm29480		chr1	92842177	92848771	6595	-	0	1	0	2	0	1	5	0	0	0	0	1	0	0	0	0	1
ENSMUSG00000034212	protein_coding	Ankmy1		chr1	92859803	92902906	43104	-	7	9	15	9	8	7	12	15	12	13	13	9	12	7	10	16	7
ENSMUSG00000047067	protein_coding	Dusp28		chr1	92906981	92908435	1455	+	354	362	311	330	323	347	340	385	399	309	343	301	313	287	348	336	314
ENSMUSG00000097251	lncRNA	5033417F24Rik		chr1	92908378	92910764	2387	-	65	54	98	81	45	48	58	75	99	70	53	64	67	66	61	56	62
ENSMUSG00000026269	protein_coding	Rnpepl1		chr1	92910783	92924384	13602	+	2478	3307	3769	3477	2854	2715	3114	2792	2789	2573	2502	2916	3272	2535	3288	2972	2781
ENSMUSG00000100632	lncRNA	9430060I03Rik		chr1	92933526	92950590	17065	-	6	8	6	12	7	5	5	2	13	6	7	14	11	6	10	5	6
ENSMUSG00000026270	protein_coding	Capn10		chr1	92934376	92947941	13566	+	585	715	804	679	656	558	645	581	730	627	570	642	659	637	786	645	657
ENSMUSG00000026271	protein_coding	Gpr35		chr1	92950865	92986391	35527	+	61	61	78	57	39	43	52	29	32	59	58	72	76	46	57	72	65
ENSMUSG00000045091	protein_coding	Aqp12		chr1	93006334	93012269	5936	+	1	1	0	1	3	0	0	1	1	2	1	0	0	0	5	4	1
ENSMUSG00000014602	protein_coding	Kif1a		chr1	93015464	93101951	86488	-	74	159	120	160	157	127	153	131	120	130	123	188	225	125	184	141	180
ENSMUSG00000101378	lncRNA	Gm28086		chr1	93122931	93124103	1173	-	0	0	0	0	2	0	0	0	0	0	0	0	0	0	0	0	0
ENSMUSG00000026272	protein_coding	Agxt		chr1	93135240	93145421	10182	+	2	3	1	5	2	4	6	1	0	1	3	1	4	1	0	2	2
ENSMUSG00000034159	protein_coding	Mab21l4		chr1	93151349	93160948	9600	-	550	499	816	468	460	314	497	371	417	621	669	563	693	529	607	578	507
ENSMUSG00000084989	protein_coding	Crocc2		chr1	93168725	93231072	62348	+	18	17	18	29	19	17	27	27	10	14	7	13	25	14	20	11	17
ENSMUSG00000047793	protein_coding	Sned1	ncRNA_host	chr1	93235841	93301065	65225	+	418	679	602	1118	467	436	653	508	483	408	434	692	870	693	639	711	727
ENSMUSG00000026273	protein_coding	Mterf4		chr1	93299211	93305915	6705	-	251	250	310	271	242	271	213	299	274	257	269	257	256	251	295	265	249
ENSMUSG00000101172	lncRNA	Gm28535		chr1	93305964	93317309	11346	+	1	0	0	2	2	2	0	0	6	2	0	0	1	0	0	1	0
ENSMUSG00000100351	processed_pseudogene	Gm7867	pseudo_consens	chr1	93306694	93307239	546	-	1	2	1	1	1	2	0	1	2	2	2	1	0	2	2	2	5
ENSMUSG00000026274	protein_coding	Pask		chr1	93308770	93343482	34713	-	144	132	208	174	146	106	142	111	137	78	87	125	118	146	116	139	112
ENSMUSG00000026275	protein_coding	Ppp1r7	ncRNA_host	chr1	93342854	93373489	30636	+	783	962	1256	944	920	831	901	873	872	836	909	894	1054	833	1084	908	859
ENSMUSG00000098689	miRNA	Mir6345		chr1	93352158	93352285	128	+	0	0	0	1	0	0	0	0	0	0	0	0	0	0	0	0	0
ENSMUSG00000064389	snRNA	Gm26446		chr1	93363255	93363357	103	+	0	0	0	0	0	0	0	0	0	0	0	0	1	0	0	2	2
ENSMUSG00000034107	protein_coding	Ano7		chr1	93373930	93404303	30374	+	290	310	367	462	258	288	424	263	298	331	352	402	576	500	591	535	484
ENSMUSG00000034088	protein_coding	Hdlbp		chr1	93405940	93478815	72876	-	5761	7993	10080	7789	7388	6163	6937	6238	6187	5979	5683	6082	7623	5594	7330	6938	6014
ENSMUSG00000090489	processed_pseudogene	Gm17415		chr1	93421700	93422488	789	+	3	1	1	5	2	3	1	3	1	3	0	5	1	0	4	0	4
ENSMUSG00000026276	protein_coding	Sept2		chr1	93478964	93510260	31297	+	35	31	40	45	34	34	29	40	47	24	40	39	31	38	45	39	34
ENSMUSG00000034066	protein_coding	Farp2	overlapping_locus	chr1	93512079	93621976	109898	+	175	267	302	294	246	200	231	200	204	201	196	187	266	178	220	217	193
ENSMUSG00000103854	TEC	Gm37250	overlapping_locus	chr1	93531815	93534202	2388	+	0	1	1	1	0	0	0	1	1	1	0	0	0	0	0	0	1
ENSMUSG00000026277	protein_coding	Stk25		chr1	93619751	93658659	38909	-	1141	1234	1424	1566	1135	1173	1309	1302	1391	1323	1229	1261	1386	1450	1459	1562	1291
ENSMUSG00000100927	lncRNA	Gm28536		chr1	93635193	93636509	1317	+	0	0	1	1	1	0	0	0	0	0	0	1	0	0	0	0	0
ENSMUSG00000026278	protein_coding	Bok		chr1	93685660	93695764	10105	+	1288	1309	1779	1217	1393	1385	1530	1153	1079	1463	1171	1089	1245	1137	1349	1277	1051
ENSMUSG00000026279	protein_coding	Thap4		chr1	93701935	93754864	52930	-	639	657	687	652	671	597	656	583	588	624	546	525	636	513	623	572	535
ENSMUSG00000101952	lncRNA	Gm10550		chr1	93731104	93751072	19969	+	0	0	0	0	0	0	0	0	0	2	0	0	0	1	0	0	0
ENSMUSG00000026280	protein_coding	Atg4b		chr1	93751500	93790610	39111	+	885	943	1127	1098	943	810	1000	780	934	848	850	806	968	851	950	910	858
ENSMUSG00000026281	protein_coding	Dtymk		chr1	93792576	93801934	9359	-	541	481	644	574	472	512	514	536	607	476	463	471	394	688	641	592	441
ENSMUSG00000026283	protein_coding	Ing5		chr1	93803965	93822101	18137	+	330	383	383	456	421	385	442	319	349	352	315	320	376	367	420	398	391
ENSMUSG00000088961	snRNA	Gm22089		chr1	93808570	93808671	102	-	0	0	0	0	0	0	0	0	0	0	0	0	0	0	1	0	0
ENSMUSG00000073609	protein_coding	D2hgdh		chr1	93824909	93852348	27440	+	42	54	64	55	37	37	42	42	60	47	45	42	58	55	48	51	70
ENSMUSG00000093805	protein_coding	Gal3st2b		chr1	93918311	93942650	24340	+	2	0	0	2	1	1	0	0	0	1	0	0	0	0	0	0	0
ENSMUSG00000099624	unprocessed_pseudogene	Gm7889		chr1	93975353	93985816	10464	+	7	6	10	6	7	7	2	6	8	4	5	11	8	7	4	12	8
ENSMUSG00000073608	protein_coding	Gal3st2c		chr1	93990509	94017147	26639	+	1	0	0	0	1	0	0	0	0	0	0	0	0	0	0	0	0
ENSMUSG00000026285	protein_coding	Pdcd1		chr1	94038305	94052553	14249	-	2	2	3	3	0	0	0	0	1	2	2	2	1	2	4	0	0
ENSMUSG00000100990	processed_pseudogene	Gm7891	pseudo_consens	chr1	94204417	94205259	843	+	1	0	0	0	0	0	0	0	0	0	0	0	0	0	0	0	0
ENSMUSG00000100347	processed_pseudogene	Gm7895	pseudo_consens	chr1	94468715	94469887	1173	-	4	3	3	4	5	1	1	5	3	2	4	2	5	2	1	4	2
ENSMUSG00000099592	processed_pseudogene	Gm5264	pseudo_consens	chr1	95255963	95256810	848	-	0	1	0	0	0	0	0	0	0	0	0	0	0	0	0	0	0
ENSMUSG00000051185	protein_coding	Fam174a	overlapping_locus	chr1	95313623	95335284	21662	+	717	624	720	765	656	685	811	829	958	755	671	640	679	777	839	705	604
ENSMUSG00000103973	TEC	BC055308	overlapping_locus	chr1	95328681	95331218	2538	+	2	9	5	12	2	3	3	4	2	5	7	3	4	3	6	5	3
ENSMUSG00000081051	processed_pseudogene	Gm15427	pseudo_consens	chr1	95498621	95499151	531	+	99	118	107	109	108	103	124	92	95	79	95	78	94	71	117	88	78
ENSMUSG00000040710	protein_coding	St8sia4	overlapping_locus	chr1	95587682	95667571	79890	-	113	99	86	149	81	75	107	86	148	124	131	132	154	129	139	115	122
ENSMUSG00000100777	lncRNA	4930598F16Rik		chr1	95701184	95716518	15335	-	1	0	0	0	0	0	1	0	1	3	3	2	4	0	0	1	0
ENSMUSG00000095955	snRNA	Gm22360		chr1	95832129	95832235	107	-	0	0	0	0	0	0	0	0	1	0	0	0	0	0	0	0	0
ENSMUSG00000100362	processed_pseudogene	Gm1833	pseudo_consens	chr1	96645420	96646170	751	+	0	1	1	4	3	0	2	2	1	3	1	0	1	1	1	1	2
ENSMUSG00000040693	protein_coding	Slco4c1		chr1	96816270	96872171	55902	-	6	3	5	2	6	3	4	8	5	2	13	6	5	1	8	3	4
ENSMUSG00000097814	lncRNA	Panct2		chr1	96871126	96907796	36671	+	0	0	0	1	0	0	0	0	0	1	0	0	1	0	0	0	0
ENSMUSG00000097480	processed_pseudogene	Gm9499	pseudo_consens	chr1	97001820	97002783	964	-	1	1	0	3	0	1	0	1	2	1	0	0	0	0	0	3	0
ENSMUSG00000100454	lncRNA	Gm28901		chr1	97024516	97025565	1050	-	0	0	0	0	0	0	1	0	0	0	0	0	0	0	0	0	0
ENSMUSG00000044757	processed_pseudogene	Gm6430		chr1	97024681	97025928	1248	+	0	0	3	0	0	3	4	3	2	1	5	2	0	0	2	1	4
ENSMUSG00000101348	transcribed_unprocessed_pseudogene	Gm7135		chr1	97346475	97573015	226541	+	0	0	0	0	0	0	0	0	0	0	0	0	0	0	0	0	2
ENSMUSG00000044768	protein_coding	D1Ertd622e		chr1	97606318	97662074	55757	-	277	372	452	419	382	357	393	354	313	301	296	284	364	348	355	359	299
ENSMUSG00000040648	protein_coding	Ppip5k2		chr1	97706048	97770411	64364	-	549	693	865	813	605	613	594	602	576	536	579	673	733	529	675	599	595
ENSMUSG00000026333	protein_coding	Gin1		chr1	97770172	97793709	23538	+	167	180	193	241	178	170	187	185	240	137	176	163	146	209	176	193	187
ENSMUSG00000026335	protein_coding	Pam	overlapping_locus	chr1	97795114	98095646	300533	-	3794	4872	4818	5594	4536	4113	4900	4485	4602	4391	5161	4149	4623	4346	5410	4644	4275
ENSMUSG00000104140	TEC	Gm37140	overlapping_locus	chr1	97878382	97880065	1684	-	3	5	6	19	3	6	4	7	8	8	6	10	6	7	6	4	8
ENSMUSG00000089169	misc_RNA	Gm25413		chr1	97936400	97936711	312	+	0	0	0	0	0	0	0	0	0	0	0	0	0	0	0	0	1
ENSMUSG00000089782	processed_pseudogene	Gm3531	overlapping_locus	chr1	97948901	97949389	489	-	66	71	69	55	58	64	72	71	93	80	67	51	51	54	73	75	72
ENSMUSG00000089706	lncRNA	B230216N24Rik	overlapping_locus	chr1	98031116	98057680	26565	-	2	2	6	1	2	2	2	6	5	4	2	3	6	3	0	2	6
ENSMUSG00000100182	lncRNA	1810006J02Rik		chr1	98131456	98144655	13200	+	0	0	0	0	1	0	0	0	0	0	0	1	0	0	0	0	0
ENSMUSG00000100711	lncRNA	Gm29461		chr1	98173648	98190698	17051	+	0	0	0	0	0	0	0	0	0	0	1	0	0	0	0	0	0
ENSMUSG00000097608	processed_pseudogene	Gm7952	pseudo_consens	chr1	98263523	98264506	984	+	3	2	0	1	2	2	1	2	2	2	0	1	0	1	0	2	2
ENSMUSG00000099634	processed_pseudogene	Gm29462	pseudo_consens	chr1	98267151	98267438	288	+	4	1	2	6	2	1	5	3	3	2	3	4	3	5	5	4	4
ENSMUSG00000089791	processed_pseudogene	Gm3555	overlapping_locus	chr1	98457768	98459162	1395	+	0	1	0	0	0	0	0	0	0	0	2	0	4	0	0	1	0
ENSMUSG00000067028	protein_coding	Cntnap5b	overlapping_locus	chr1	99772765	100485942	713178	+	0	0	0	0	1	0	0	0	0	0	0	1	0	0	0	0	0
ENSMUSG00000082431	processed_pseudogene	Prdx2-ps1	pseudo_consens	chr1	99790429	99791025	597	-	45	50	41	46	38	37	45	30	39	35	46	33	39	43	58	47	36
ENSMUSG00000100662	processed_pseudogene	Gm19029	overlapping_locus	chr1	100006021	100006584	564	+	3	2	1	2	2	1	1	5	2	1	0	0	2	1	1	0	2
ENSMUSG00000099835	processed_pseudogene	Gm29668		chr1	100282329	100282643	315	-	5	7	6	8	15	5	7	12	6	11	8	6	9	5	6	6	7
ENSMUSG00000100794	processed_pseudogene	Gm29667	overlapping_locus	chr1	100282791	100283280	490	+	0	1	0	1	2	0	1	4	1	0	0	1	1	1	0	0	2
ENSMUSG00000100222	processed_pseudogene	Psmb6-ps2	pseudo_consens	chr1	101385886	101386590	705	+	1	4	1	2	1	1	3	3	0	0	2	4	5	3	1	2	2
ENSMUSG00000100065	processed_pseudogene	Gm18969	pseudo_consens	chr1	101753814	101754543	730	-	1	0	0	0	0	0	0	0	0	0	1	0	0	0	1	1	1
ENSMUSG00000100349	processed_pseudogene	Gm28188	pseudo_consens	chr1	101880506	101880741	236	-	0	0	0	3	0	0	0	0	0	1	0	0	0	0	0	0	1
ENSMUSG00000099375	lncRNA	Gm28187		chr1	101892958	101895091	2134	-	0	0	1	4	0	0	0	0	1	2	1	2	1	3	0	0	1
ENSMUSG00000102325	TEC	Gm37789		chr1	103724345	103727233	2889	+	0	0	0	0	0	0	0	0	1	0	0	0	0	0	0	0	0
ENSMUSG00000099464	processed_pseudogene	Gm5260	pseudo_consens	chr1	104513001	104514068	1068	+	0	0	1	0	0	1	0	0	0	0	0	2	0	0	0	0	0
ENSMUSG00000100935	unprocessed_pseudogene	Gm29592	pseudo_consens	chr1	104609524	104610883	1360	+	0	0	0	0	0	0	0	0	0	0	0	0	0	0	0	0	0
ENSMUSG00000050840	protein_coding	Cdh20	overlapping_locus	chr1	104768529	104995481	226953	+	0	3	3	9	2	2	3	5	2	7	2	3	4	2	3	4	3
ENSMUSG00000047496	protein_coding	Rnf152		chr1	105276914	105356710	79797	-	151	200	148	239	174	144	174	121	152	188	162	174	161	135	220	186	144
ENSMUSG00000099582	processed_pseudogene	Gm29014	pseudo_consens	chr1	105321121	105321446	326	+	0	1	0	0	0	0	0	0	0	0	0	0	0	0	0	0	0
ENSMUSG00000097482	lncRNA	Gm17634		chr1	105356007	105361737	5731	+	0	1	0	3	2	1	1	2	0	0	2	2	2	3	3	3	1
ENSMUSG00000101214	lncRNA	Gm28403	overlapping_locus	chr1	105382260	105569139	186880	-	0	0	2	0	0	0	2	1	0	0	2	1	0	0	1	1	0
ENSMUSG00000067017	pseudogene	Gm3608		chr1	105455971	105458829	2859	+	3	2	2	1	1	4	2	3	1	1	2	1	3	1	1	1	2
ENSMUSG00000056536	protein_coding	Pign	overlapping_locus	chr1	105518422	105663677	145256	-	653	857	981	873	653	623	761	762	744	731	737	732	868	657	873	781	703
ENSMUSG00000100672	lncRNA	Gm28404	overlapping_locus	chr1	105564126	105564578	453	-	8	2	7	5	3	3	8	8	3	4	7	3	5	2	3	1	2
ENSMUSG00000101219	processed_pseudogene	Gm20302	pseudo_consens	chr1	105574537	105574811	275	+	5	1	3	6	1	1	2	0	3	2	0	2	4	1	4	2	1
ENSMUSG00000101656	processed_pseudogene	Gm8004	pseudo_consens	chr1	105615742	105616358	617	+	0	1	1	0	0	0	0	0	0	1	2	2	0	0	1	0	0
ENSMUSG00000026319	protein_coding	Relch	overlapping_locus	chr1	105663861	105755191	91331	+	1048	1259	1414	1589	1006	1051	1337	974	1119	1003	1064	1186	1358	1209	1226	1208	1018
ENSMUSG00000104044	TEC	Gm37566	overlapping_locus	chr1	105708573	105712927	4355	+	1	0	2	1	0	0	0	0	0	1	0	0	2	0	0	0	3
ENSMUSG00000101330	processed_pseudogene	Gm10193		chr1	105764444	105764674	231	+	0	0	0	0	1	0	1	0	0	1	1	1	1	1	1	1	1
ENSMUSG00000026321	protein_coding	Tnfrsf11a		chr1	105780718	105847981	67264	+	353	444	489	507	352	330	338	314	389	363	386	403	593	314	471	406	366
ENSMUSG00000102690	TEC	Gm37779		chr1	105887633	105891012	3380	-	0	0	0	0	0	0	0	0	0	0	0	0	0	1	0	0	0
ENSMUSG00000099843	lncRNA	Gm7160		chr1	105979350	105990282	10933	-	42	41	50	69	37	42	46	48	54	58	43	56	68	42	45	37	46
ENSMUSG00000038866	protein_coding	Zcchc2		chr1	105990406	106034074	43669	+	614	908	945	1094	693	697	828	658	682	669	710	769	991	637	860	740	689
ENSMUSG00000102501	TEC	Gm37372		chr1	106072584	106075894	3311	-	0	0	0	0	0	1	0	0	0	0	0	1	0	0	0	0	0
ENSMUSG00000097612	processed_pseudogene	Gm26509	pseudo_consens	chr1	106090068	106091015	948	+	2	0	1	2	0	2	0	2	0	1	0	3	1	0	0	3	1
ENSMUSG00000101583	lncRNA	Gm20753		chr1	106152625	106171524	18900	-	1	0	1	2	3	2	0	2	1	1	1	2	3	0	1	1	1
ENSMUSG00000044340	protein_coding	Phlpp1	overlapping_locus	chr1	106171752	106394250	222499	+	356	518	584	539	567	498	532	425	404	419	485	556	561	377	580	515	482
ENSMUSG00000103291	TEC	Gm38235	overlapping_locus	chr1	106219314	106224265	4952	+	2	0	0	0	0	0	0	1	1	0	1	0	0	0	0	0	0
ENSMUSG00000100247	lncRNA	A530053M12Rik		chr1	106400178	106401987	1810	-	0	1	0	0	0	0	0	0	0	0	0	1	0	0	0	1	0
ENSMUSG00000099604	processed_pseudogene	Gm6651	pseudo_consens	chr1	106439600	106439870	271	+	1	0	0	0	2	0	0	0	0	1	1	0	0	1	0	1	0
ENSMUSG00000057329	protein_coding	Bcl2	overlapping_locus	chr1	106538178	106714274	176097	-	256	364	327	340	319	306	321	262	255	345	373	441	442	259	335	303	309
ENSMUSG00000054006	lncRNA	D630008O14Rik		chr1	106541943	106575045	33103	+	0	0	0	0	0	0	0	0	0	0	0	0	0	0	1	0	0
ENSMUSG00000103348	TEC	Gm37053	overlapping_locus	chr1	106604784	106606870	2087	-	0	0	0	0	0	0	0	0	1	0	1	0	1	0	0	0	0
ENSMUSG00000009905	protein_coding	Kdsr		chr1	106720459	106759727	39269	-	2066	2226	2201	2389	2164	1959	2283	2012	2391	2056	2026	1673	1978	2014	2011	1743	1834
ENSMUSG00000009907	protein_coding	Vps4b		chr1	106764071	106796728	32658	-	2480	2943	3259	2882	2732	2536	2940	2445	2628	2479	2620	2459	2879	2453	2868	2615	2350
ENSMUSG00000067006	protein_coding	Serpinb5		chr1	106861173	106883348	22176	+	14236	12430	22729	13813	12183	11818	13340	11718	14177	13461	14338	11170	14738	12408	15012	13066	11705
ENSMUSG00000083613	processed_pseudogene	Pou2f3-rs1	pseudo_consens	chr1	106887852	106888897	1046	-	5	12	12	5	8	5	6	13	10	8	7	5	9	6	19	4	4
ENSMUSG00000059956	protein_coding	Serpinb12		chr1	106934449	106957080	22632	+	1931	1425	2597	1781	1297	1267	1431	1211	1649	1048	1499	1058	1659	1454	2187	1583	1450
ENSMUSG00000048775	protein_coding	Serpinb13		chr1	106980984	107001195	20212	+	253	232	344	343	223	184	211	153	236	200	224	172	282	238	355	263	242
ENSMUSG00000084228	unprocessed_pseudogene	Gm8080		chr1	107020137	107025325	5189	-	29	13	16	13	6	10	8	6	16	5	12	11	17	17	33	15	28
ENSMUSG00000044594	protein_coding	Serpinb3a		chr1	107045587	107052303	6717	-	144	11	31	34	20	12	23	24	26	14	8	18	16	25	43	22	28
ENSMUSG00000058017	protein_coding	Serpinb3d		chr1	107078167	107083506	5340	-	3	0	0	0	2	0	0	1	0	1	0	0	2	1	1	0	2
ENSMUSG00000083884	processed_pseudogene	Gm15388	pseudo_consens	chr1	107137844	107138569	726	-	0	1	0	1	0	0	1	0	0	0	0	0	0	0	0	0	0
ENSMUSG00000073602	protein_coding	Serpinb3b		chr1	107153940	107278361	124422	-	5405	4359	7368	7303	3914	4039	4784	4565	5932	3928	5330	4440	5214	5377	6408	5700	4750
ENSMUSG00000080729	unprocessed_pseudogene	Gm8084		chr1	107191475	107193557	2083	-	1	0	0	3	0	1	1	0	0	0	0	0	1	1	0	0	0
ENSMUSG00000081114	processed_pseudogene	Gm15390	pseudo_consens	chr1	107253553	107254290	738	-	0	0	0	0	0	0	1	0	0	0	0	0	0	1	0	0	0
ENSMUSG00000073601	protein_coding	Serpinb3c		chr1	107271201	107278371	7171	-	182	149	251	251	145	181	160	159	219	140	209	167	153	153	243	177	142
ENSMUSG00000084189	unprocessed_pseudogene	Gm8089		chr1	107290341	107302354	12014	-	1	1	0	0	0	0	0	0	0	0	0	0	0	1	0	0	0
ENSMUSG00000026327	protein_coding	Serpinb11		chr1	107361198	107380475	19278	+	288	271	389	296	224	208	235	267	236	230	224	208	206	301	368	270	304
ENSMUSG00000087210	lncRNA	Gm15391		chr1	107385200	107387412	2213	-	0	1	1	1	2	0	0	1	0	0	1	0	0	2	0	2	0
ENSMUSG00000067001	protein_coding	Serpinb7		chr1	107399655	107452689	53035	+	3265	3200	3622	4680	3394	3810	4151	4061	5537	3780	4542	3820	3866	4207	4739	4323	3462
ENSMUSG00000089278	snoRNA	Gm24553		chr1	107440047	107440177	131	-	0	0	0	0	0	1	0	3	1	0	0	3	0	2	0	1	3
ENSMUSG00000062345	protein_coding	Serpinb2	overlapping_locus	chr1	107511423	107535478	24056	+	4573	4148	7742	6537	4339	6422	6647	5438	6219	5777	3803	3579	4403	4551	4406	4186	3774
ENSMUSG00000092572	polymorphic_pseudogene	Serpinb10	overlapping_locus	chr1	107529003	107549271	20269	+	915	1111	1657	1505	1298	1540	1444	1529	1567	1641	1118	1188	1089	1249	1219	1184	1291
ENSMUSG00000026315	protein_coding	Serpinb8		chr1	107590006	107610484	20479	+	1797	1884	2575	2479	1390	1485	1627	1504	1895	2129	2152	1849	2565	1750	2157	1793	1575
ENSMUSG00000086161	lncRNA	Gm15389		chr1	107687008	107693514	6507	+	7	2	1	1	5	5	3	2	3	2	7	3	7	5	3	2	0
ENSMUSG00000100457	lncRNA	D830032E09Rik	overlapping_locus	chr1	107917259	108028337	111079	+	0	0	0	0	0	0	2	0	0	0	0	1	1	0	0	0	0
ENSMUSG00000099484	processed_pseudogene	Gm28282		chr1	107963122	107963307	186	-	0	1	0	0	0	0	0	0	0	0	0	0	0	0	0	0	0
ENSMUSG00000100041	processed_pseudogene	Gm5702	pseudo_consens	chr1	108376970	108379438	2469	-	1	2	3	2	5	2	0	4	3	2	1	1	3	3	1	3	2
ENSMUSG00000101097	processed_pseudogene	Gm6679	pseudo_consens	chr1	108770135	108772003	1869	+	0	0	0	0	0	0	0	0	0	0	0	0	0	0	0	0	0
ENSMUSG00000100025	processed_pseudogene	Gm8141	pseudo_consens	chr1	109833024	109834746	1723	+	2	3	2	1	1	1	4	2	3	3	0	4	3	1	2	2	3
ENSMUSG00000026312	protein_coding	Cdh7		chr1	109982431	110140157	157727	+	3	3	1	0	1	0	0	1	1	0	0	0	0	0	3	2	1
ENSMUSG00000099926	processed_pseudogene	Gm6693	pseudo_consens	chr1	110600021	110600833	813	+	0	0	0	0	0	0	0	0	0	0	0	0	0	0	0	0	0
ENSMUSG00000047216	protein_coding	Cdh19	overlapping_locus	chr1	110888326	110977584	89259	-	202	224	165	307	207	256	230	202	234	295	287	332	298	228	265	254	247
ENSMUSG00000102788	TEC	Gm38255	overlapping_locus	chr1	110957831	110960826	2996	-	0	2	0	1	1	2	3	0	0	3	2	3	4	2	3	3	2
ENSMUSG00000102160	TEC	Gm36944	overlapping_locus	chr1	110964679	110967437	2759	-	1	0	3	1	2	0	1	0	2	0	3	1	2	1	1	2	0
ENSMUSG00000100555	processed_pseudogene	Gm8173	pseudo_consens	chr1	111804934	111807775	2842	-	0	0	0	0	0	0	0	0	0	0	0	0	0	0	0	1	0
ENSMUSG00000102728	TEC	Gm37934		chr1	111833823	111834224	402	+	1	0	0	1	1	0	0	0	0	1	0	0	0	0	0	0	0
ENSMUSG00000038702	protein_coding	Dsel		chr1	111858702	111864918	6217	-	661	768	904	862	779	697	849	734	687	739	776	729	802	714	884	770	727
ENSMUSG00000101875	processed_pseudogene	Gm6028	pseudo_consens	chr1	111880735	111881308	574	-	4	4	0	7	9	3	1	6	0	6	4	5	1	4	6	6	1
ENSMUSG00000099732	processed_pseudogene	Gm17752	pseudo_consens	chr1	112049436	112057110	7675	-	0	0	0	0	0	0	0	0	0	0	0	0	0	2	0	0	0
ENSMUSG00000101220	processed_pseudogene	Gm6717	pseudo_consens	chr1	112137868	112138705	838	+	0	1	0	0	1	1	0	0	0	0	0	0	0	1	0	0	0
ENSMUSG00000100020	processed_pseudogene	Gm19086	pseudo_consens	chr1	112151089	112151753	665	+	0	1	1	0	0	0	0	0	0	0	0	0	0	0	0	1	0
ENSMUSG00000101054	processed_pseudogene	Gm18406		chr1	112404187	112404855	669	-	0	1	0	2	3	1	2	0	0	0	0	0	1	1	0	2	0
ENSMUSG00000097648	lncRNA	9330185C12Rik		chr1	113891385	113964134	72750	-	1	1	0	0	1	2	0	1	2	0	2	2	1	1	0	1	1
ENSMUSG00000101687	processed_pseudogene	Gm4854	pseudo_consens	chr1	115219190	115219763	574	-	1	0	0	0	0	0	0	0	0	0	0	0	1	0	0	0	0
ENSMUSG00000070695	protein_coding	Cntnap5a		chr1	115684756	116587323	902568	+	0	0	0	0	0	0	0	0	0	0	0	1	0	0	0	0	0
ENSMUSG00000102033	processed_pseudogene	Gm28263	pseudo_consens	chr1	116633777	116634176	400	+	0	0	0	0	0	0	0	0	0	0	0	0	0	0	0	0	0
ENSMUSG00000101303	protein_coding	B020011L13Rik		chr1	117781133	117803359	22227	+	0	0	0	0	0	0	0	0	0	0	0	0	0	0	0	0	0
ENSMUSG00000099534	processed_pseudogene	Gm28169	overlapping_locus	chr1	117842962	117843306	345	+	0	0	1	0	0	0	0	0	0	1	0	0	0	0	0	0	0
ENSMUSG00000101415	protein_coding	Gm28168		chr1	117928015	117949988	21974	+	0	0	0	0	0	0	0	0	0	0	0	0	0	0	0	1	0
ENSMUSG00000102030	protein_coding	Gm29106		chr1	118176542	118202307	25766	+	3	3	2	4	3	2	4	1	2	5	3	1	1	0	2	3	3
ENSMUSG00000099870	processed_pseudogene	Gm7200	pseudo_consens	chr1	118249863	118251025	1163	+	0	0	0	0	0	0	0	0	0	0	0	1	0	0	0	0	0
ENSMUSG00000026374	protein_coding	Tsn		chr1	118294778	118311739	16962	-	1548	1900	1987	1915	1899	1878	1809	1743	1749	1553	1656	1557	1589	1637	1794	1748	1546
ENSMUSG00000026377	protein_coding	Nifk		chr1	118321839	118333822	11984	+	973	1034	1454	1023	1117	1072	1129	1018	947	1087	972	895	959	1001	1129	1001	945
ENSMUSG00000099936	lncRNA	Gm28867		chr1	118357312	118363449	6138	+	1	0	1	0	0	0	1	1	0	0	0	1	0	1	1	1	0
ENSMUSG00000064302	protein_coding	Clasp1		chr1	118389058	118612678	223621	+	1169	1887	2126	1833	1565	1338	1567	1239	1282	1232	1411	1521	1815	1240	1644	1568	1510
ENSMUSG00000077257	snoRNA	Gm26080		chr1	118453355	118453485	131	-	0	0	0	0	0	0	0	0	0	0	0	0	1	0	0	0	0
ENSMUSG00000107722	lncRNA	2900060B14Rik	ncRNA_host	chr1	118458652	118459267	616	-	0	0	0	2	0	1	1	0	0	0	0	0	0	0	0	0	0
ENSMUSG00000026380	protein_coding	Tfcp2l1	ncRNA_host	chr1	118627945	118685168	57224	+	27	63	37	70	63	53	57	25	31	36	27	41	55	36	47	35	26
ENSMUSG00000101624	processed_pseudogene	Gm28882	pseudo_consens	chr1	118651482	118651795	314	-	2	0	0	0	0	0	0	0	0	1	0	0	0	1	1	0	0
ENSMUSG00000048402	protein_coding	Gli2		chr1	118834132	119053619	219488	-	229	438	332	361	358	327	362	249	228	276	316	331	397	232	326	264	279
ENSMUSG00000097408	lncRNA	Gm26831		chr1	119058469	119059848	1380	+	0	1	0	0	0	0	0	1	2	1	0	0	0	0	0	0	0
ENSMUSG00000096939	processed_pseudogene	Gm8321	pseudo_consens	chr1	119157586	119158565	980	+	0	0	0	0	0	0	1	0	0	1	0	1	0	0	1	0	1
ENSMUSG00000100767	processed_pseudogene	Gm3508	pseudo_consens	chr1	119241962	119242753	792	-	3	1	1	2	5	2	2	2	4	2	0	2	2	1	2	1	3
ENSMUSG00000099860	lncRNA	Gm29456		chr1	119305346	119326833	21488	-	0	0	0	0	0	0	0	0	0	0	0	0	1	0	0	0	0
ENSMUSG00000101179	lncRNA	Gm29455		chr1	119329200	119385581	56382	+	0	0	0	1	0	0	0	0	0	0	0	0	0	1	0	0	0
ENSMUSG00000037035	protein_coding	Inhbb		chr1	119415465	119422248	6784	-	389	420	505	490	408	342	553	434	343	427	407	461	563	357	557	455	476
ENSMUSG00000004451	protein_coding	Ralb		chr1	119470305	119504794	34490	-	641	669	787	677	684	644	673	584	616	693	597	627	749	685	741	646	612
ENSMUSG00000098447	lncRNA	Gm27184		chr1	119520090	119526359	6270	-	3	1	1	0	3	1	4	3	4	4	2	0	2	3	6	2	2
ENSMUSG00000098923	protein_coding	Tmem185b	retrogene	chr1	119526160	119528983	2824	+	222	235	289	250	223	249	278	220	238	262	245	251	268	270	294	255	207
ENSMUSG00000101731	lncRNA	3830432H09Rik		chr1	119529480	119536165	6686	-	0	1	0	1	1	1	2	0	2	2	1	0	3	0	1	0	1
ENSMUSG00000026383	protein_coding	Epb41l5	overlapping_locus	chr1	119545037	119649000	103964	-	171	187	266	260	196	194	208	152	222	234	242	222	221	191	261	201	161
ENSMUSG00000102687	TEC	Gm37219	overlapping_locus	chr1	119630744	119631669	926	-	0	0	0	0	0	0	0	0	0	0	0	1	0	0	0	0	0
ENSMUSG00000026384	protein_coding	Ptpn4	overlapping_locus	chr1	119652467	119837613	185147	-	704	946	906	935	815	742	950	665	802	698	733	785	839	719	826	789	649
ENSMUSG00000091876	processed_pseudogene	Gm3851	pseudo_consens	chr1	119787769	119788086	318	+	0	0	1	1	0	0	0	1	0	0	0	0	1	0	0	0	0
ENSMUSG00000103146	TEC	Gm37745	overlapping_locus	chr1	119790763	119798925	8163	-	2	0	0	1	0	0	0	0	0	0	0	1	4	0	1	0	0
ENSMUSG00000090277	processed_pseudogene	Gm8338	pseudo_consens	chr1	119817763	119818125	363	+	1	0	1	0	0	0	0	1	0	0	0	2	1	0	1	2	0
ENSMUSG00000100636	processed_pseudogene	Gm3551		chr1	119897461	119898124	664	+	0	0	1	1	0	1	0	0	0	0	0	2	0	1	2	1	0
ENSMUSG00000101224	lncRNA	Gm28209		chr1	119903130	119906897	3768	+	0	0	1	0	1	0	0	0	0	1	2	1	0	1	0	0	1
ENSMUSG00000036975	protein_coding	Tmem177		chr1	119907890	119913208	5319	-	216	309	257	414	269	206	253	265	274	219	338	253	393	245	369	313	262
ENSMUSG00000036962	protein_coding	Cfap221		chr1	119923341	119997234	73894	-	0	0	4	0	3	0	1	0	0	0	0	1	2	1	1	2	1
ENSMUSG00000026387	protein_coding	Sctr		chr1	120006894	120063536	56643	+	10	15	17	24	12	13	6	16	20	13	14	11	17	12	8	10	12
ENSMUSG00000050777	protein_coding	Tmem37		chr1	120067377	120074074	6698	-	99	128	69	152	113	150	106	105	181	162	132	130	188	106	91	115	73
ENSMUSG00000026385	protein_coding	Dbi		chr1	120113280	120121078	7799	-	6640	5448	5998	5822	5884	5911	6553	5566	6948	5219	6305	4662	5271	6267	7323	6023	5105
ENSMUSG00000026388	protein_coding	3110009E18Rik		chr1	120121187	120188189	67003	+	95	82	119	115	89	103	110	82	119	128	99	72	83	120	101	94	119
ENSMUSG00000026389	protein_coding	Steap3		chr1	120190757	120272705	81949	-	372	517	480	671	483	392	540	543	529	470	566	517	740	603	701	597	599
ENSMUSG00000036907	protein_coding	C1ql2		chr1	120340582	120343174	2593	+	0	0	0	0	1	0	0	0	0	0	0	0	0	0	0	0	0
ENSMUSG00000026390	protein_coding	Marco		chr1	120474538	120505024	30487	-	28	81	25	72	22	25	61	40	26	34	40	59	45	60	63	45	134
ENSMUSG00000058665	protein_coding	En1		chr1	120602418	120607992	5575	+	3	0	0	3	3	1	0	0	2	0	3	4	2	2	3	5	3
ENSMUSG00000099957	lncRNA	2610027F03Rik		chr1	120621740	120690403	68664	+	2	1	3	2	1	1	3	1	0	1	1	2	1	1	1	1	2
ENSMUSG00000101386	lncRNA	Gm29346		chr1	120758443	120763565	5123	+	0	0	0	0	0	2	0	1	0	0	0	0	0	0	0	0	0
ENSMUSG00000100761	processed_pseudogene	Gm29344	pseudo_consens	chr1	120825247	120825456	210	-	0	0	0	0	0	0	0	1	0	0	0	0	0	0	0	0	0
ENSMUSG00000097881	lncRNA	Celrr		chr1	121087405	121178441	91037	+	0	1	0	1	0	1	3	0	2	1	2	0	0	2	1	1	0
ENSMUSG00000104332	TEC	Gm38283		chr1	121300137	121300831	695	-	0	0	0	0	0	0	0	0	0	0	0	0	1	0	0	0	0
ENSMUSG00000003721	protein_coding	Insig2		chr1	121304353	121332589	28237	-	2823	2594	3056	2648	2557	2211	2867	2374	2871	2796	2856	2387	2673	2436	2815	2475	2118
ENSMUSG00000104253	TEC	Gm37174		chr1	121328092	121331149	3058	+	31	26	29	26	21	13	13	25	30	22	28	23	28	26	25	37	29
ENSMUSG00000101791	lncRNA	2210011K15Rik		chr1	121355116	121359900	4785	-	1	2	2	1	1	3	2	0	3	1	1	2	2	0	5	1	2
ENSMUSG00000026339	protein_coding	Ccdc93		chr1	121431049	121506460	75412	+	362	496	588	643	422	405	448	398	454	491	516	491	601	409	490	465	501
ENSMUSG00000085857	lncRNA	Gm15392		chr1	121489296	121493203	3908	-	1	0	2	3	2	0	1	0	1	2	0	1	0	0	2	0	3
ENSMUSG00000083582	processed_pseudogene	Gm15393	pseudo_consens	chr1	121507585	121507803	219	-	0	0	0	0	0	0	0	0	0	0	0	0	0	0	1	0	0
ENSMUSG00000050534	protein_coding	Htr5b		chr1	121509842	121528465	18624	-	1	1	0	0	3	1	0	0	0	2	3	1	1	1	6	0	0
ENSMUSG00000081130	processed_pseudogene	Gm8217	pseudo_consens	chr1	121520583	121521047	465	+	0	0	1	0	0	1	0	1	1	0	0	0	0	0	0	0	0
ENSMUSG00000001674	protein_coding	Ddx18		chr1	121553835	121567989	14155	-	213	262	363	265	247	200	286	239	222	225	204	216	232	234	263	255	211
ENSMUSG00000100913	processed_pseudogene	Gm8392	pseudo_consens	chr1	122190221	122191055	835	+	1	1	4	2	1	1	1	0	1	2	2	1	1	1	1	1	0
ENSMUSG00000100762	processed_pseudogene	Gm8403	pseudo_consens	chr1	123147920	123149217	1298	-	0	0	0	0	0	0	0	0	0	1	0	0	0	0	0	0	0
ENSMUSG00000101495	processed_pseudogene	Gm28912	pseudo_consens	chr1	123287574	123287807	234	+	0	0	0	0	0	1	0	0	0	0	3	1	0	0	0	0	1
ENSMUSG00000036815	protein_coding	Dpp10	overlapping_locus	chr1	123321471	124846039	1524569	-	3	6	2	1	6	1	1	0	2	5	6	9	1	5	6	4	6
ENSMUSG00000101985	processed_pseudogene	Gm28929	pseudo_consens	chr1	123756558	123757750	1193	+	0	1	0	0	0	1	1	0	1	0	1	0	1	2	0	0	0
ENSMUSG00000101006	processed_pseudogene	Gm28299	overlapping_locus	chr1	124615191	124615596	406	-	0	0	0	0	0	0	0	0	0	0	0	0	0	0	0	0	1
ENSMUSG00000026341	protein_coding	Actr3		chr1	125392905	125435727	42823	-	2170	2343	3072	2501	2144	2065	2298	2173	2189	2314	2263	2113	2347	2370	2513	2300	2034
ENSMUSG00000102063	lncRNA	Gm28706		chr1	125444567	125447398	2832	+	0	0	0	0	0	0	0	0	0	0	0	0	0	0	0	0	0
ENSMUSG00000026342	protein_coding	Slc35f5		chr1	125560595	125595820	35226	+	1485	1532	1718	1695	1340	1269	1549	1359	1740	1532	1612	1416	1626	1507	1679	1530	1378
ENSMUSG00000026343	protein_coding	Gpr39		chr1	125676995	125873862	196868	+	1	1	1	0	2	0	0	0	0	0	0	0	1	3	0	0	2
ENSMUSG00000026344	protein_coding	Lypd1		chr1	125867622	125913101	45480	-	0	2	2	0	0	0	1	0	0	1	0	1	0	0	0	0	1
ENSMUSG00000049690	protein_coding	Nckap5	overlapping_locus	chr1	125913620	126830799	917180	-	46	47	44	37	39	49	44	22	36	36	44	30	42	30	48	40	43
ENSMUSG00000104519	TEC	Gm37161	overlapping_locus	chr1	125919266	125921962	2697	-	0	0	1	1	2	0	1	0	1	1	0	0	1	1	0	0	3
ENSMUSG00000101385	processed_pseudogene	Gm5261	pseudo_consens	chr1	127049984	127050696	713	-	0	0	0	1	0	0	0	0	0	0	1	1	0	0	0	0	1
ENSMUSG00000036155	protein_coding	Mgat5	overlapping_locus	chr1	127205015	127488336	283322	+	514	870	985	779	689	589	691	614	513	589	660	751	740	517	805	672	610
ENSMUSG00000104039	TEC	Gm37772	overlapping_locus	chr1	127242091	127243484	1394	+	0	0	0	0	0	0	0	0	0	1	0	0	0	0	0	0	0
ENSMUSG00000104378	TEC	Gm37510	overlapping_locus	chr1	127270524	127275285	4762	+	3	1	2	4	3	2	1	1	1	2	0	2	2	0	3	3	5
ENSMUSG00000099471	processed_pseudogene	Gm8451	pseudo_consens	chr1	127282662	127283108	447	-	3	2	4	2	1	4	2	1	3	3	4	1	0	1	5	2	2
ENSMUSG00000065687	snoRNA	Gm23734		chr1	127375131	127375239	109	+	0	0	0	0	0	0	0	0	0	0	1	0	0	0	0	0	0
ENSMUSG00000103390	TEC	Gm38301	overlapping_locus	chr1	127406776	127407318	543	+	0	0	0	0	0	0	0	0	0	0	0	0	0	0	0	0	0
ENSMUSG00000026347	protein_coding	Tmem163		chr1	127486546	127679548	193003	-	2	3	4	2	2	1	2	2	0	1	4	5	2	0	1	3	2
ENSMUSG00000026348	protein_coding	Acmsd		chr1	127729413	127767978	38566	+	0	0	0	1	0	0	2	2	1	3	1	0	0	0	0	0	0
ENSMUSG00000102014	lncRNA	2900009J06Rik		chr1	127753616	127774092	20477	-	1	2	1	0	2	1	1	2	4	1	1	0	3	2	2	3	4
ENSMUSG00000026349	protein_coding	Ccnt2		chr1	127774164	127808061	33898	+	845	1115	1039	1555	939	901	1172	912	1005	868	895	1096	1245	1021	1120	1138	930
ENSMUSG00000051590	protein_coding	Map3k19		chr1	127814791	127855031	40241	-	1	14	6	9	4	1	6	2	7	9	7	6	7	11	7	2	6
ENSMUSG00000036104	protein_coding	Rab3gap1		chr1	127868773	127943868	75096	+	1176	1439	1654	1435	1334	1211	1356	1160	1190	1116	1339	1252	1493	1054	1366	1286	1142
ENSMUSG00000036086	protein_coding	Zranb3	overlapping_locus	chr1	127954184	128103047	148864	-	66	93	87	91	84	65	77	95	86	71	70	110	91	71	102	78	81
ENSMUSG00000099760	lncRNA	Gm28800		chr1	127959516	127967452	7937	+	2	3	3	4	5	5	7	7	3	1	2	4	4	2	5	1	5
ENSMUSG00000104164	TEC	Gm38248	overlapping_locus	chr1	127978905	127984687	5783	-	6	7	9	14	10	8	6	6	14	2	9	7	10	9	3	12	7
ENSMUSG00000058603	processed_pseudogene	Rpl28-ps1		chr1	128038569	128038982	414	+	50	51	53	57	43	42	51	53	52	24	34	28	40	40	62	53	15
ENSMUSG00000102782	TEC	Gm37625	overlapping_locus	chr1	128084460	128089331	4872	-	0	1	0	0	0	0	1	0	0	0	0	0	0	0	0	0	0
ENSMUSG00000103999	TEC	Gm38026	overlapping_locus	chr1	128097591	128101470	3880	-	0	0	0	0	0	0	0	1	0	0	0	0	0	0	0	0	0
ENSMUSG00000056211	protein_coding	R3hdm1	overlapping_locus	chr1	128103301	128237736	134436	+	769	1064	1079	1292	989	901	1018	940	860	817	857	996	1205	874	946	1039	930
ENSMUSG00000101535	processed_pseudogene	Gm29383	pseudo_consens	chr1	128128410	128128889	480	-	0	0	1	0	0	0	0	0	0	0	0	0	0	0	0	0	0
ENSMUSG00000104239	TEC	Gm37588	overlapping_locus	chr1	128132157	128134652	2496	+	0	0	1	0	0	0	0	0	0	0	0	0	1	0	0	0	2
ENSMUSG00000102179	TEC	Gm37868	overlapping_locus	chr1	128143614	128146348	2735	+	0	0	0	0	0	0	0	0	0	0	0	1	0	1	0	0	0
ENSMUSG00000103497	TEC	Gm37407	overlapping_locus	chr1	128163214	128164529	1316	+	1	0	1	1	0	0	1	0	1	1	1	0	1	1	0	0	2
ENSMUSG00000026353	protein_coding	Ubxn4		chr1	128243964	128279378	35415	+	1906	2161	2637	2411	2113	2011	2197	1925	2011	2176	1974	1959	2384	1895	2174	1942	1939
ENSMUSG00000026354	protein_coding	Lct		chr1	128284756	128328318	43563	-	9	12	11	12	16	11	11	13	13	7	12	10	16	14	13	10	12
ENSMUSG00000026355	protein_coding	Mcm6		chr1	128331590	128359664	28075	-	1374	1654	2387	1565	1356	1178	1270	1289	1260	1082	982	978	1205	1397	1353	1395	1234
ENSMUSG00000026356	protein_coding	Dars		chr1	128363707	128417368	53662	-	1238	1347	2032	1503	1383	1286	1439	1440	1453	1319	1317	1194	1397	1394	1432	1448	1314
ENSMUSG00000100078	processed_pseudogene	Gm6170	pseudo_consens	chr1	128520073	128521460	1388	-	13	9	17	10	11	15	10	21	16	9	19	6	8	8	9	9	6
ENSMUSG00000045382	protein_coding	Cxcr4		chr1	128588199	128592293	4095	-	103	121	85	79	95	70	90	82	90	62	80	74	92	84	88	59	57
ENSMUSG00000099403	processed_pseudogene	Gm29599	pseudo_consens	chr1	128750926	128751347	422	+	0	0	0	0	0	0	0	0	0	0	0	1	0	0	0	0	0
ENSMUSG00000097283	lncRNA	Gm26686		chr1	128770599	128774421	3823	-	0	0	1	0	0	0	1	1	1	0	0	0	0	2	0	0	1
ENSMUSG00000042581	protein_coding	Thsd7b	overlapping_locus	chr1	129273302	130219278	945977	+	14	18	18	36	15	17	17	5	18	12	13	17	19	17	9	18	15
ENSMUSG00000089648	processed_pseudogene	Gm15790	pseudo_consens	chr1	129796608	129797858	1251	-	1	1	2	1	0	1	0	2	0	3	0	0	1	1	0	1	2
ENSMUSG00000094122	processed_pseudogene	Rpl31-ps9		chr1	129801387	129801764	378	-	1	1	1	0	1	0	2	2	0	0	1	1	1	3	1	0	1
ENSMUSG00000103803	TEC	Gm37064	overlapping_locus	chr1	129860815	129863045	2231	+	0	0	0	0	0	0	0	0	0	0	1	0	0	0	0	0	0
ENSMUSG00000103281	TEC	Gm37278	overlapping_locus	chr1	129943162	129946033	2872	+	0	0	0	0	0	0	0	0	0	0	0	0	1	0	0	0	0
ENSMUSG00000086633	lncRNA	Gm16081		chr1	130269950	130281258	11309	-	0	0	1	0	0	0	0	0	0	0	0	0	0	0	0	0	0
ENSMUSG00000026401	protein_coding	Cd55b		chr1	130388537	130423009	34473	-	1	1	0	0	0	0	1	0	0	0	0	0	0	1	2	1	0
ENSMUSG00000087691	lncRNA	Cd55os		chr1	130422824	130437914	15091	+	13	15	15	40	13	21	21	16	15	20	17	30	27	25	18	22	26
ENSMUSG00000086825	lncRNA	Gm15675		chr1	130429781	130437191	7411	-	88	119	84	197	90	90	117	97	109	100	96	118	136	148	133	122	127
ENSMUSG00000026399	protein_coding	Cd55		chr1	130439027	130462744	23718	-	482	620	705	766	548	586	700	674	662	752	756	735	855	677	739	838	767
ENSMUSG00000085526	lncRNA	Gm16083	overlapping_locus	chr1	130462576	130557075	94500	+	5	2	0	3	3	0	2	1	2	4	0	4	7	7	1	3	4
ENSMUSG00000102139	TEC	Gm37109	overlapping_locus	chr1	130467972	130470225	2254	+	0	1	2	0	0	0	1	1	0	1	3	0	0	0	0	0	0
ENSMUSG00000103751	TEC	Gm37283	overlapping_locus	chr1	130473743	130475313	1571	+	0	1	0	2	1	0	1	1	0	0	0	2	0	0	0	1	1
ENSMUSG00000042554	protein_coding	Zp3r	ncRNA_host	chr1	130576713	130629621	52909	-	0	0	0	0	0	0	0	0	0	0	0	0	0	0	0	0	0
ENSMUSG00000026405	protein_coding	C4bp		chr1	130634773	130661632	26860	-	0	0	1	1	0	0	3	1	0	1	1	0	1	1	1	0	0
ENSMUSG00000101904	protein_coding	Gm29427	overlapping_locus	chr1	130670209	130715799	45591	-	1	4	2	1	1	1	1	1	0	1	0	1	2	1	0	1	1
ENSMUSG00000100257	unprocessed_pseudogene	C4bp-ps1	overlapping_locus	chr1	130670261	130684071	13811	-	2	2	5	3	2	1	0	1	2	1	0	1	3	0	0	5	1
ENSMUSG00000026409	protein_coding	Pfkfb2	overlapping_locus	chr1	130689182	130729253	40072	-	267	393	358	453	312	315	455	287	353	329	284	359	422	309	369	441	343
ENSMUSG00000046404	protein_coding	Yod1		chr1	130717327	130724358	7032	+	757	766	952	972	710	630	769	639	741	690	766	701	1130	694	993	803	672
ENSMUSG00000104515	TEC	Gm37163	overlapping_locus	chr1	130727132	130728821	1690	-	0	1	1	0	1	0	1	3	0	4	1	0	0	2	0	0	1
ENSMUSG00000042510	protein_coding	AA986860		chr1	130731976	130744622	12647	+	700	694	1071	865	626	541	653	523	779	675	726	675	958	671	906	812	627
ENSMUSG00000099556	lncRNA	Gm28857		chr1	130740162	130741327	1166	-	1	0	2	7	2	1	3	1	1	1	2	2	1	1	0	3	3
ENSMUSG00000100106	lncRNA	Gm28856		chr1	130766384	130784433	18050	+	10	7	15	9	2	4	7	6	12	6	11	7	7	7	8	13	4
ENSMUSG00000026415	protein_coding	Fcamr		chr1	130800902	130814740	13839	+	45	51	85	63	34	55	40	32	63	38	41	48	65	41	55	52	37
ENSMUSG00000086706	lncRNA	Gm15848		chr1	130809977	130824084	14108	-	25	34	46	38	23	26	24	28	29	16	19	19	31	19	35	23	16
ENSMUSG00000026417	protein_coding	Pigr		chr1	130826684	130852249	25566	+	11	8	11	15	13	6	9	9	9	7	1	12	12	11	14	4	2
ENSMUSG00000042474	protein_coding	Fcmr		chr1	130865669	130880791	15123	+	3	4	6	1	6	3	3	11	9	4	2	7	2	9	8	7	9
ENSMUSG00000026420	protein_coding	Il24		chr1	130882074	130887454	5381	-	0	0	0	0	0	1	5	0	0	1	1	2	3	1	1	0	0
ENSMUSG00000026416	protein_coding	Il20		chr1	130906985	130911451	4467	-	2	4	2	0	25	24	20	6	27	14	6	25	7	57	37	57	50
ENSMUSG00000016524	protein_coding	Il19		chr1	130932656	130940115	7460	-	1	0	0	2	0	0	1	0	1	0	1	2	2	3	2	0	2
ENSMUSG00000016529	protein_coding	Il10		chr1	131019845	131024974	5130	+	6	1	5	9	1	0	3	2	4	0	2	8	0	0	2	1	1
ENSMUSG00000016528	protein_coding	Mapkapk2	overlapping_locus	chr1	131053700	131097826	44127	-	2167	2844	2748	2671	2641	2369	2680	2322	2248	2499	2379	2310	2707	2000	2559	2554	2058
ENSMUSG00000088705	snRNA	Gm25549		chr1	131073658	131073751	94	-	0	0	1	0	0	0	0	0	0	0	0	1	0	0	0	0	0
ENSMUSG00000102856	TEC	Gm37084	overlapping_locus	chr1	131086252	131092149	5898	-	0	1	1	2	0	2	6	3	0	2	3	1	4	1	0	3	1
ENSMUSG00000016526	protein_coding	Dyrk3		chr1	131127455	131138340	10886	-	35	39	60	37	41	47	60	32	30	32	27	26	27	31	31	30	35
ENSMUSG00000026427	protein_coding	Eif2d		chr1	131153181	131187658	34478	+	808	802	1071	877	728	726	844	834	893	864	840	793	851	838	943	940	700
ENSMUSG00000026430	protein_coding	Rassf5		chr1	131176410	131245258	68849	-	639	971	963	933	729	578	723	613	746	693	815	787	1124	686	1018	760	722
ENSMUSG00000101729	processed_pseudogene	Gm17796	pseudo_consens	chr1	131216877	131218089	1213	+	1	1	0	3	1	1	1	1	2	1	2	2	5	3	6	0	3
ENSMUSG00000042349	protein_coding	Ikbke		chr1	131254343	131279606	25264	-	292	339	456	394	266	277	322	334	390	311	334	416	354	405	412	412	373
ENSMUSG00000102027	lncRNA	Gm28914		chr1	131259507	131260553	1047	+	1	0	0	0	1	0	1	0	1	0	1	1	1	0	0	0	0
ENSMUSG00000102055	lncRNA	Gm28913		chr1	131263330	131266749	3420	+	0	4	1	5	2	2	2	0	4	1	1	4	1	1	2	6	5
ENSMUSG00000026425	protein_coding	Srgap2	overlapping_locus	chr1	131285251	131527352	242102	-	1208	1680	2151	2260	1311	1146	1535	1294	1406	1287	1478	1711	2194	1380	1956	1763	1464
ENSMUSG00000102733	TEC	Gm38262	overlapping_locus	chr1	131341302	131342683	1382	-	0	0	1	0	0	0	0	0	0	1	0	1	1	0	0	0	1
ENSMUSG00000104060	TEC	Gm37954	overlapping_locus	chr1	131376461	131378531	2071	-	0	0	0	0	0	0	0	0	0	0	0	0	1	0	0	0	2
ENSMUSG00000101778	lncRNA	Gm29488	overlapping_locus	chr1	131406812	131409213	2402	-	1	3	1	3	3	0	2	0	2	1	2	1	2	0	1	2	0
ENSMUSG00000099959	processed_pseudogene	Gm29487	overlapping_locus	chr1	131447440	131447695	256	-	0	0	0	0	0	0	0	1	0	0	0	0	1	1	0	0	0
ENSMUSG00000055184	protein_coding	Fam72a		chr1	131527903	131539872	11970	+	23	34	43	52	20	37	30	27	46	32	26	28	34	27	34	16	26
ENSMUSG00000026432	protein_coding	Avpr1b		chr1	131599239	131612000	12762	+	3	1	1	1	0	0	1	0	0	2	0	0	0	0	0	0	1
ENSMUSG00000095841	processed_pseudogene	Gm8532	pseudo_consens	chr1	131632509	131632969	461	-	6	5	6	2	4	5	6	3	0	2	3	2	6	3	0	4	0
ENSMUSG00000004552	protein_coding	Ctse		chr1	131638306	131675505	37200	+	26	45	38	70	36	30	37	49	23	46	69	64	82	38	68	40	29
ENSMUSG00000052688	protein_coding	Rab7b		chr1	131688695	131715439	26745	+	908	1088	1367	1087	796	765	894	849	967	1004	971	844	1151	876	1071	943	877
ENSMUSG00000042268	protein_coding	Slc26a9		chr1	131744022	131771504	27483	+	96	97	165	95	68	52	72	60	67	49	47	37	86	57	105	94	58
ENSMUSG00000042251	protein_coding	Pm20d1		chr1	131797381	131821473	24093	+	85	96	69	120	93	95	105	83	87	107	128	95	121	100	131	120	100
ENSMUSG00000013275	protein_coding	Slc41a1		chr1	131827493	131848865	21373	+	849	1505	1123	1561	1461	1299	1284	1132	1239	1161	1226	1156	1595	924	1119	1303	991
ENSMUSG00000026433	protein_coding	Rab29		chr1	131867224	131872887	5664	+	275	212	251	210	221	175	213	201	269	232	263	220	247	257	283	223	225
ENSMUSG00000026434	protein_coding	Nucks1	overlapping_locus	chr1	131910534	131936321	25788	+	1983	2584	2642	2294	2417	2267	2438	2041	1903	1953	2033	2078	2255	2038	2459	2166	1823
ENSMUSG00000103569	TEC	Gm38067	overlapping_locus	chr1	131914529	131916439	1911	+	0	0	4	1	1	0	1	0	0	0	1	1	3	1	1	3	1
ENSMUSG00000026435	protein_coding	Slc45a3	overlapping_locus	chr1	131962967	131982969	20003	+	266	288	302	344	211	217	252	218	284	291	234	268	336	255	362	321	248
ENSMUSG00000026436	protein_coding	Elk4	overlapping_locus	chr1	132007607	132032612	25006	+	1071	1525	1322	1518	1310	1166	1276	1127	1010	1134	1264	1334	1411	886	1196	1128	1047
ENSMUSG00000059149	protein_coding	Mfsd4a		chr1	132022806	132068062	45257	-	382	567	566	540	470	432	496	381	428	424	437	479	607	380	425	427	359
ENSMUSG00000103966	TEC	Gm37120		chr1	132102365	132108323	5959	+	0	1	1	1	3	3	2	0	2	0	1	1	0	0	3	3	0
ENSMUSG00000026437	protein_coding	Cdk18		chr1	132112237	132139684	27448	-	64	84	69	78	76	48	86	78	62	63	52	76	92	55	77	60	59
ENSMUSG00000099874	lncRNA	Gm29629		chr1	132139504	132142800	3297	+	0	0	0	1	0	0	0	0	0	0	0	0	0	0	0	0	0
ENSMUSG00000079330	protein_coding	Lemd1	ncRNA_host	chr1	132191431	132259227	67797	+	6	3	7	8	5	4	8	9	11	9	3	6	9	9	12	12	14
ENSMUSG00000089808	processed_pseudogene	Gm7241	pseudo_consens	chr1	132284453	132284809	357	+	1	0	0	2	1	0	1	1	1	0	0	0	0	0	0	2	0
ENSMUSG00000042115	protein_coding	Klhdc8a		chr1	132298626	132307357	8732	+	34	39	51	40	34	20	16	35	16	23	30	32	30	21	35	28	13
ENSMUSG00000009772	protein_coding	Nuak2		chr1	132316126	132333488	17363	+	438	500	528	541	407	366	450	292	336	417	420	440	532	442	518	487	428
ENSMUSG00000100658	lncRNA	F730311O21Rik		chr1	132342023	132349626	7604	+	2	2	8	8	5	0	3	9	8	10	5	4	11	7	13	2	5
ENSMUSG00000042066	protein_coding	Tmcc2		chr1	132356315	132391281	34967	-	142	283	182	285	219	232	242	230	211	213	248	200	290	204	268	246	211
ENSMUSG00000090079	lncRNA	Gm15849		chr1	132381129	132382509	1381	+	0	1	0	0	0	0	0	0	0	0	0	0	0	0	0	0	0
ENSMUSG00000042046	protein_coding	Dstyk		chr1	132417555	132466958	49404	+	906	1224	1184	1353	1053	979	1191	882	991	993	1063	1130	1285	837	1188	1070	1008
ENSMUSG00000097760	lncRNA	6030442K20Rik		chr1	132466433	132477064	10632	-	4	14	13	12	5	9	12	13	11	5	10	18	7	5	15	11	10
ENSMUSG00000026439	protein_coding	Rbbp5		chr1	132477365	132505659	28295	+	545	614	762	724	552	535	558	518	521	509	515	570	614	556	626	588	554
ENSMUSG00000048174	protein_coding	Tmem81		chr1	132506230	132508639	2410	+	116	161	138	161	138	103	122	120	121	93	125	134	134	148	147	136	116
ENSMUSG00000053024	protein_coding	Cntn2		chr1	132509427	132543256	33830	-	3	2	3	7	9	2	2	9	4	2	0	3	3	9	1	5	6
ENSMUSG00000026442	protein_coding	Nfasc		chr1	132564690	132741797	177108	-	46	91	64	103	92	74	83	74	61	70	51	95	114	60	79	81	79
ENSMUSG00000026443	protein_coding	Lrrn2		chr1	132880273	132940005	59733	+	16	29	16	18	21	12	27	23	14	16	15	33	33	12	21	18	27
ENSMUSG00000102709	TEC	Gm38308		chr1	132943512	132945320	1809	-	1	1	1	1	0	0	0	0	0	0	0	0	0	1	0	2	0
ENSMUSG00000054387	protein_coding	Mdm4		chr1	132959484	133030561	71078	-	1410	1704	1722	2429	1446	1344	1659	1370	1547	1304	1482	1938	2102	1842	1812	1966	1706
ENSMUSG00000100228	processed_pseudogene	Gm29257	pseudo_consens	chr1	133025801	133026439	639	+	7	7	6	3	6	2	7	7	11	4	3	1	5	2	5	3	5
ENSMUSG00000026447	protein_coding	Pik3c2b		chr1	133045667	133108687	63021	+	258	392	353	389	308	276	317	301	289	287	258	303	351	294	334	346	350
ENSMUSG00000101102	lncRNA	Gm28609		chr1	133050128	133068405	18278	-	4	5	2	5	4	3	2	4	8	3	6	2	4	5	2	0	0
ENSMUSG00000102425	TEC	Gm26616		chr1	133128676	133131782	3107	-	12	13	18	15	8	4	4	16	20	12	8	15	14	11	25	11	16
ENSMUSG00000046062	protein_coding	Ppp1r15b		chr1	133131143	133139783	8641	+	1146	1567	1770	1649	1427	1330	1438	1277	1322	1517	1441	1340	1631	1283	1614	1421	1338
ENSMUSG00000041757	protein_coding	Plekha6		chr1	133164210	133303435	139226	+	534	770	857	916	611	557	703	647	711	606	675	676	888	616	929	804	663
ENSMUSG00000101693	lncRNA	Gm19461		chr1	133250398	133269808	19411	-	1	4	1	9	2	6	6	3	2	1	1	6	3	4	3	6	2
ENSMUSG00000103421	protein_coding	Golt1a	overlapping_locus	chr1	133309800	133323026	13227	+	0	1	0	0	0	0	0	0	0	0	0	0	0	0	0	0	0
ENSMUSG00000115958	protein_coding	Gm28040	overlapping_locus	chr1	133309827	133329722	19896	+	0	0	0	0	0	0	0	0	0	1	0	1	0	0	0	0	0
ENSMUSG00000070645	protein_coding	Ren1		chr1	133350510	133360325	9816	+	0	2	0	0	1	0	1	0	0	0	1	0	2	0	0	0	1
ENSMUSG00000070644	protein_coding	Etnk2		chr1	133363572	133380336	16765	+	15	28	24	24	26	26	24	28	17	28	19	38	22	25	20	22	23
ENSMUSG00000070643	protein_coding	Sox13		chr1	133382303	133424377	42075	-	282	418	298	417	353	316	334	301	253	302	313	378	400	302	394	292	340
ENSMUSG00000101004	processed_pseudogene	Gm8596	pseudo_consens	chr1	133529479	133530270	792	+	2	1	1	0	0	0	1	1	0	0	0	0	1	1	0	1	0
ENSMUSG00000090553	protein_coding	Snrpe		chr1	133603871	133610291	6421	-	644	525	630	611	561	553	610	576	725	565	667	519	406	613	655	609	528
ENSMUSG00000102976	protein_coding	Zc3h11a	overlapping_locus	chr1	133619862	133661380	41519	-	144	262	256	282	170	163	207	204	195	162	156	210	299	169	228	200	175
ENSMUSG00000094410	protein_coding	Gm38394	overlapping_locus	chr1	133619940	133661318	41379	-	43	105	79	118	60	68	118	61	62	68	70	86	120	59	90	71	66
ENSMUSG00000051998	protein_coding	Lax1		chr1	133679091	133690108	11018	-	28	34	52	57	37	27	28	28	24	34	28	31	45	40	44	40	41
ENSMUSG00000026463	protein_coding	Atp2b4	overlapping_locus	chr1	133699457	133801041	101585	-	4809	7120	9682	7328	5441	4891	6164	5109	4966	6128	6217	6920	8650	5516	7290	6950	6368
ENSMUSG00000102509	TEC	Gm37368	overlapping_locus	chr1	133775210	133778421	3212	-	2	3	2	1	1	1	1	0	0	2	0	2	4	1	3	2	1
ENSMUSG00000103166	TEC	Gm10537		chr1	133829528	133831225	1698	+	1	0	0	2	0	0	0	0	1	0	2	0	0	0	0	0	1
ENSMUSG00000100830	lncRNA	Gm28441		chr1	133835189	133838372	3184	+	4	5	1	14	4	7	4	3	1	2	1	3	6	7	0	2	4
ENSMUSG00000010311	protein_coding	Optc		chr1	133897199	133907999	10801	-	3	4	5	4	8	3	7	5	8	4	4	3	9	3	6	0	3
ENSMUSG00000090208	lncRNA	Gm15851		chr1	133906531	133914822	8292	+	0	1	2	1	0	0	0	1	1	1	0	0	2	1	0	0	0
ENSMUSG00000041577	protein_coding	Prelp		chr1	133910304	133921414	11111	-	923	1552	1550	1774	1108	1110	1486	1268	1535	1741	1741	1754	2437	1264	2093	1745	1645
ENSMUSG00000100987	lncRNA	Gm1627		chr1	133962162	133971938	9777	+	0	0	2	0	0	1	0	0	2	1	0	1	0	1	0	0	1
ENSMUSG00000041559	protein_coding	Fmod		chr1	134037254	134048277	11024	+	3719	6495	5353	6212	5018	4572	5113	5581	5458	5869	6964	5510	6850	4576	9228	5393	6181
ENSMUSG00000020423	protein_coding	Btg2		chr1	134075170	134079120	3951	-	1205	1200	1442	1277	999	1037	1144	949	1197	1146	1241	1184	1447	876	1392	978	956
ENSMUSG00000102380	TEC	Gm38140		chr1	134096405	134099159	2755	-	1	0	0	3	3	1	2	0	2	1	4	1	1	1	0	1	1
ENSMUSG00000073559	processed_pseudogene	Gm8618		chr1	134109368	134109799	432	+	10	5	8	8	2	11	2	6	8	9	6	6	7	8	9	10	6
ENSMUSG00000026450	protein_coding	Chit1		chr1	134111242	134151540	40299	+	4429	3831	6443	4496	3494	3249	3622	3428	3473	3668	3436	3012	4383	2928	3878	3329	2694
ENSMUSG00000064246	protein_coding	Chil1		chr1	134182176	134190181	8006	+	990	677	695	666	593	462	710	542	677	745	678	628	941	591	808	655	752
ENSMUSG00000042451	protein_coding	Mybph		chr1	134193448	134201232	7785	+	29	39	79	66	54	30	37	32	49	110	93	63	115	76	30	110	108
ENSMUSG00000042429	protein_coding	Adora1		chr1	134199223	134235431	36209	-	54	108	39	93	71	67	67	87	90	89	62	85	120	49	103	57	79
ENSMUSG00000026459	protein_coding	Myog		chr1	134289989	134292548	2560	+	20	21	22	25	42	25	39	23	23	34	28	20	32	26	14	36	24
ENSMUSG00000026458	protein_coding	Ppfia4		chr1	134296783	134332928	36146	-	216	293	267	355	246	239	311	297	342	229	331	291	345	317	433	345	280
ENSMUSG00000042305	protein_coding	Tmem183a		chr1	134346097	134361979	15883	-	1459	1309	1434	1737	1394	1362	1536	1282	1564	1309	1258	1375	1363	1510	1458	1410	1369
ENSMUSG00000050526	protein_coding	Mgat4f		chr1	134385940	134390981	5042	+	0	0	0	0	1	0	0	0	1	0	0	0	0	0	0	0	0
ENSMUSG00000026456	protein_coding	Cyb5r1		chr1	134405559	134411740	6182	+	459	543	610	762	645	625	596	663	663	594	533	631	592	733	570	824	617
ENSMUSG00000026457	protein_coding	Adipor1		chr1	134415378	134433351	17974	+	5591	6311	6707	6605	6068	5659	6078	6090	6796	6304	6179	5648	6413	5220	6547	5776	5017
ENSMUSG00000101061	lncRNA	Platr1		chr1	134435628	134439597	3970	+	0	0	0	1	0	0	0	0	2	2	0	0	0	0	0	1	0
ENSMUSG00000102722	TEC	Gm37935		chr1	134454492	134455473	982	-	2	5	6	8	3	2	2	3	6	9	7	2	6	3	3	5	3
ENSMUSG00000026455	protein_coding	Klhl12		chr1	134455531	134491018	35488	+	481	599	615	662	556	485	597	507	485	490	490	448	519	427	484	517	422
ENSMUSG00000042229	protein_coding	Rabif	ncRNA_host	chr1	134494648	134508774	14127	+	572	638	770	654	680	573	661	556	583	607	637	577	655	528	700	607	608
ENSMUSG00000077202	snoRNA	Gm25612		chr1	134505338	134505463	126	+	1	0	0	1	0	1	0	0	0	1	0	1	0	0	0	0	0
ENSMUSG00000096712	processed_pseudogene	Gm15454		chr1	134518081	134518563	483	+	0	1	1	1	1	0	0	1	0	2	1	0	1	0	0	0	0
ENSMUSG00000101955	unprocessed_pseudogene	Gm29376		chr1	134519978	134524139	4162	+	0	1	0	2	0	0	0	1	0	1	0	0	1	0	0	1	0
ENSMUSG00000046367	protein_coding	Mgat4e		chr1	134540941	134549682	8742	-	1	0	0	0	0	0	0	0	0	0	0	2	0	0	0	0	0
ENSMUSG00000042207	protein_coding	Kdm5b		chr1	134560171	134635285	75115	+	1272	1448	1830	1477	1170	1093	1306	992	1103	1243	1359	1260	1589	1111	1451	1257	1177
ENSMUSG00000097435	lncRNA	Gm26783		chr1	134642254	134646520	4267	-	0	0	0	0	0	0	0	0	0	0	0	0	1	0	0	0	0
ENSMUSG00000026452	protein_coding	Syt2		chr1	134646677	134762593	115917	+	4	4	4	9	6	2	4	2	1	7	3	3	6	2	13	5	7
ENSMUSG00000073557	protein_coding	Ppp1r12b	overlapping_locus	chr1	134754658	134955942	201285	-	1011	1772	1386	2203	1745	1678	1753	1504	1511	1327	1317	1387	1990	1315	1168	1872	1241
ENSMUSG00000103614	TEC	Gm37949	overlapping_locus	chr1	134799895	134801985	2091	-	0	3	0	0	3	4	2	1	4	3	1	3	2	2	3	4	4
ENSMUSG00000103976	TEC	Gm37677	overlapping_locus	chr1	134819916	134827549	7634	-	4	9	5	7	2	2	6	11	3	4	8	5	12	6	6	13	7
ENSMUSG00000101168	lncRNA	Gm28892		chr1	134834142	134846415	12274	+	3	0	0	0	1	2	1	3	0	1	0	0	0	0	0	0	0
ENSMUSG00000026429	protein_coding	Ube2t		chr1	134962565	134974162	11598	+	101	72	93	88	71	72	83	77	84	64	62	55	60	93	71	74	76
ENSMUSG00000042793	protein_coding	Lgr6		chr1	134983301	135105276	121976	-	1197	1789	2011	1473	1589	1361	1707	1707	1307	1529	1625	1650	1610	1418	1854	1814	1661
ENSMUSG00000097993	polymorphic_pseudogene	Ptprv		chr1	135108497	135132594	24098	-	210	189	156	267	181	149	201	164	184	93	198	145	221	184	242	174	165
ENSMUSG00000097988	lncRNA	Gm10535		chr1	135108961	135113378	4418	+	1	1	0	0	0	0	0	0	0	0	1	0	0	2	0	0	1
ENSMUSG00000031506	protein_coding	Ptpn7		chr1	135132700	135145317	12618	+	80	102	88	132	72	64	89	80	84	89	98	105	127	116	108	98	82
ENSMUSG00000026426	protein_coding	Arl8a	overlapping_locus	chr1	135146824	135156269	9446	+	678	812	810	976	750	727	830	801	728	832	752	842	972	767	922	793	804
ENSMUSG00000087721	rRNA	Gm26280		chr1	135150666	135150766	101	-	1	0	3	4	3	6	2	2	2	1	0	3	4	2	4	2	4
ENSMUSG00000085311	lncRNA	Gm15445	overlapping_locus	chr1	135152963	135153806	844	+	5	11	3	21	6	8	11	3	9	8	6	11	15	17	10	10	12
ENSMUSG00000026424	protein_coding	Gpr37l1		chr1	135160234	135167681	7448	-	36	97	61	66	66	65	66	79	73	61	50	74	80	48	96	65	78
ENSMUSG00000079139	processed_pseudogene	Gm4204	pseudo_consens	chr1	135231995	135233225	1231	+	30	38	36	28	39	31	43	48	31	43	38	31	41	37	25	32	37
ENSMUSG00000097680	lncRNA	Gm26642		chr1	135248561	135266443	17883	+	15	19	12	23	8	16	14	14	18	10	9	17	17	22	19	18	12
ENSMUSG00000003051	protein_coding	Elf3		chr1	135253575	135258568	4994	-	29	18	20	26	28	17	16	18	10	17	6	19	17	19	29	19	25
ENSMUSG00000041926	protein_coding	Rnpep		chr1	135262712	135284084	21373	-	398	437	641	492	393	364	485	342	418	334	308	429	437	393	486	519	431
ENSMUSG00000062580	protein_coding	Timm17a		chr1	135295213	135313778	18566	-	774	863	905	877	893	891	898	878	1046	932	869	777	881	842	834	908	711
ENSMUSG00000048096	protein_coding	Lmod1		chr1	135324807	135368065	43259	+	67	114	75	116	69	95	82	127	110	85	103	113	105	82	101	119	132
ENSMUSG00000087859	snRNA	Gm22796		chr1	135353717	135353822	106	-	0	0	0	0	0	0	0	0	0	0	0	0	0	0	0	0	0
ENSMUSG00000041889	protein_coding	Shisa4		chr1	135371057	135375237	4181	-	177	244	181	248	185	205	214	300	289	233	257	226	246	220	257	272	179
ENSMUSG00000041879	protein_coding	Ipo9	overlapping_locus	chr1	135382312	135430499	48188	-	980	1441	1660	1503	1303	1193	1292	1107	1142	1091	1122	1246	1409	1163	1308	1351	1239
ENSMUSG00000100620	lncRNA	Gm28277	overlapping_locus	chr1	135409622	135414186	4565	-	0	0	1	0	0	0	0	0	0	0	0	0	1	0	0	0	0
ENSMUSG00000009418	protein_coding	Nav1	overlapping_locus	chr1	135434580	135688105	253526	-	442	703	712	864	598	478	687	483	424	542	619	685	1103	499	671	663	614
ENSMUSG00000102474	TEC	2610012C04Rik	overlapping_locus	chr1	135480392	135481414	1023	-	0	1	1	0	0	0	0	0	0	0	0	1	0	0	0	0	1
ENSMUSG00000104524	TEC	Gm37333	overlapping_locus	chr1	135523088	135525338	2251	-	2	0	1	1	1	0	1	0	1	2	1	1	0	1	0	0	0
ENSMUSG00000054412	lncRNA	Gm4793		chr1	135584773	135599948	15176	+	0	0	0	3	1	0	2	0	0	1	0	2	2	1	0	0	1
ENSMUSG00000026421	protein_coding	Csrp1		chr1	135720061	135752232	32172	+	4306	5560	5614	4909	5167	5520	5776	5720	5658	5748	6280	5546	5332	5480	6443	6160	5368
ENSMUSG00000041801	protein_coding	Phlda3		chr1	135766119	135769136	3018	+	1233	1402	2035	1303	1312	1322	1477	1394	1381	1764	1451	1420	1525	1348	1594	1537	1300
ENSMUSG00000026418	protein_coding	Tnni1		chr1	135779434	135810989	31556	+	392	391	300	448	418	420	332	486	539	416	485	327	413	517	241	469	389
ENSMUSG00000041782	protein_coding	Lad1		chr1	135818598	135833342	14745	+	3464	4467	6388	3973	3839	3721	4191	3492	3484	3900	3873	3523	5333	2902	4987	3859	3205
ENSMUSG00000026414	protein_coding	Tnnt2		chr1	135836354	135852260	15907	+	171	207	175	252	240	205	254	214	259	181	310	202	304	277	375	333	282
ENSMUSG00000101482	processed_pseudogene	Gm28883	pseudo_consens	chr1	135869782	135870150	369	+	2	1	4	4	5	4	2	2	3	6	2	7	6	4	4	3	5
ENSMUSG00000026413	protein_coding	Pkp1	overlapping_locus	chr1	135871395	135919207	47813	-	20804	28533	40833	25101	24209	22471	24692	19403	19017	21337	21700	22629	30774	18068	28528	22818	20139
ENSMUSG00000102414	TEC	Gm36938	overlapping_locus	chr1	135896394	135899089	2696	-	2	10	8	8	3	3	3	4	9	3	4	6	12	2	4	4	8
ENSMUSG00000051985	protein_coding	Igfn1		chr1	135953578	136006342	52765	-	1	3	6	4	6	7	1	4	3	3	6	4	1	8	4	1	0
ENSMUSG00000026411	protein_coding	Tmem9		chr1	136008150	136035342	27193	+	614	669	562	648	626	635	635	652	744	625	633	593	595	595	680	589	524
ENSMUSG00000026407	protein_coding	Cacna1s	overlapping_locus	chr1	136052750	136119822	67073	+	454	817	575	1268	913	820	777	861	1191	762	679	678	937	651	340	1038	539
ENSMUSG00000102838	TEC	Gm37014	overlapping_locus	chr1	136057181	136059433	2253	+	1	0	0	2	1	0	1	0	2	0	2	0	0	0	0	1	0
ENSMUSG00000102717	lncRNA	Gm37759		chr1	136116577	136119822	3246	-	1	5	0	4	3	5	5	5	3	3	5	5	5	7	3	5	4
ENSMUSG00000086264	lncRNA	Gm15850		chr1	136126178	136131183	5006	-	0	0	0	0	0	0	0	0	0	0	1	0	0	0	0	0	0
ENSMUSG00000041642	protein_coding	Kif21b		chr1	136131389	136177998	46610	+	200	281	161	345	290	208	319	165	174	193	170	266	292	202	210	201	181
ENSMUSG00000087230	protein_coding	Mroh3		chr1	136181652	136212828	31177	-	14	9	9	19	4	9	4	4	7	3	3	5	7	16	2	7	3
ENSMUSG00000041605	protein_coding	Inava		chr1	136213531	136234264	20734	-	374	399	584	530	398	397	422	307	336	322	348	376	519	357	512	427	399
ENSMUSG00000102941	lncRNA	Gm37552		chr1	136252671	136255846	3176	-	0	0	0	0	0	0	0	0	0	0	1	0	0	0	0	0	0
ENSMUSG00000097433	lncRNA	Gm26781		chr1	136259407	136274406	15000	+	3	3	6	4	1	2	4	1	1	3	1	4	2	2	3	2	1
ENSMUSG00000041570	protein_coding	Camsap2		chr1	136268123	136346104	77982	-	1236	1724	2081	1766	1553	1341	1608	1305	1368	1527	1626	1632	1989	1294	1700	1595	1401
ENSMUSG00000097403	lncRNA	9230116N13Rik		chr1	136411916	136415519	3604	-	43	30	41	56	33	41	40	53	58	37	39	25	43	42	50	33	38
ENSMUSG00000026404	protein_coding	Ddx59		chr1	136415271	136440158	24888	+	305	405	478	422	411	332	428	415	381	386	371	368	402	395	435	368	396
ENSMUSG00000041498	protein_coding	Kif14	overlapping_locus	chr1	136466343	136531511	65169	+	96	107	149	142	75	93	65	70	87	85	59	106	124	111	103	84	85
ENSMUSG00000099337	processed_pseudogene	Gm29486	overlapping_locus	chr1	136507409	136507780	372	+	0	0	0	0	1	0	0	0	0	0	0	0	0	0	1	0	1
ENSMUSG00000101413	processed_pseudogene	Gm29485	overlapping_locus	chr1	136523884	136524165	282	+	1	0	2	1	0	0	0	0	1	0	0	0	0	0	0	0	0
ENSMUSG00000104414	lncRNA	Gm37799		chr1	136541605	136555873	14269	+	0	0	0	0	0	0	0	0	0	0	0	0	0	0	0	0	0
ENSMUSG00000104509	lncRNA	Gm33994		chr1	136576938	136579477	2540	-	0	0	1	0	2	0	0	0	1	0	0	1	1	1	0	0	2
ENSMUSG00000104366	lncRNA	4933409D19Rik		chr1	136603033	136605468	2436	-	0	0	0	1	0	0	0	0	0	0	0	0	0	1	1	0	0
ENSMUSG00000097229	lncRNA	Platr23		chr1	136622098	136624650	2553	-	0	1	0	1	0	0	0	1	0	1	0	0	0	1	0	0	2
ENSMUSG00000041483	protein_coding	Zfp281		chr1	136624901	136630053	5153	+	294	350	364	412	341	277	388	318	327	311	380	368	406	305	417	343	331
ENSMUSG00000097113	lncRNA	Gm19705		chr1	136670769	136690804	20036	+	5	1	1	8	3	2	5	0	4	3	2	0	2	3	7	2	5
ENSMUSG00000097448	lncRNA	Platr22	ncRNA_host	chr1	136696211	136726142	29932	+	5	7	2	6	10	4	4	4	7	8	3	7	5	2	6	9	3
ENSMUSG00000096432	miRNA	Gm22132		chr1	136757510	136757609	100	-	0	0	0	0	0	1	0	0	0	0	0	0	0	0	0	0	0
ENSMUSG00000104360	processed_pseudogene	Gm8762	pseudo_consens	chr1	136789182	136789520	339	-	0	1	0	1	0	0	2	0	1	0	0	0	0	0	0	0	0
ENSMUSG00000103953	processed_pseudogene	Gm29718	pseudo_consens	chr1	136793034	136793510	477	+	0	0	0	2	2	0	2	1	0	0	0	0	0	1	0	0	0
ENSMUSG00000026398	protein_coding	Nr5a2		chr1	136842571	136960448	117878	-	17	18	5	22	14	13	12	12	17	31	31	22	27	8	18	18	21
ENSMUSG00000102738	TEC	1700006P03Rik		chr1	137325434	137325842	409	-	0	0	0	0	0	0	0	0	0	0	0	0	0	0	0	1	0
ENSMUSG00000098243	lncRNA	Gm4258	overlapping_locus	chr1	137898595	138000384	101790	+	1	0	1	4	2	2	0	0	0	0	1	1	3	0	3	5	1
ENSMUSG00000104118	TEC	Gm37298	overlapping_locus	chr1	137909291	137913158	3868	+	0	1	0	2	0	0	2	1	2	0	3	1	1	0	2	1	2
ENSMUSG00000098045	lncRNA	Gm26979		chr1	137917690	137921312	3623	-	0	0	0	0	0	0	0	0	0	0	0	0	0	0	0	0	0
ENSMUSG00000103038	TEC	Gm37124	overlapping_locus	chr1	137924388	137926379	1992	+	0	0	0	0	2	0	1	0	1	0	1	0	2	0	2	0	0
ENSMUSG00000102277	TEC	A130050O07Rik	overlapping_locus	chr1	137927251	137930273	3023	+	0	0	1	0	0	0	0	2	0	0	1	0	0	2	0	1	0
ENSMUSG00000098145	lncRNA	Gm26936		chr1	137928389	137969240	40852	-	0	0	0	0	0	0	0	0	0	0	0	0	0	0	0	1	0
ENSMUSG00000102142	lncRNA	Gm26930	overlapping_locus	chr1	137932041	137933284	1244	+	0	0	2	0	0	0	0	0	0	0	0	0	0	0	0	0	0
ENSMUSG00000104145	TEC	D130019J16Rik	overlapping_locus	chr1	137935189	137937346	2158	+	1	0	0	1	2	0	1	0	1	1	0	2	1	0	0	0	1
ENSMUSG00000103427	TEC	Gm37534	overlapping_locus	chr1	137949422	137954643	5222	+	0	3	0	0	1	0	0	0	0	1	0	0	0	2	0	0	1
ENSMUSG00000098206	lncRNA	Mir181a-1hg	overlapping_locus	chr1	137966531	137969918	3388	+	2	3	1	7	3	4	2	3	2	8	1	1	2	3	2	1	0
ENSMUSG00000104197	TEC	Gm37632	overlapping_locus	chr1	137971174	137972315	1142	+	0	1	0	0	0	0	0	0	0	0	0	0	0	0	0	0	0
ENSMUSG00000026395	protein_coding	Ptprc	overlapping_locus	chr1	138062861	138175708	112848	-	360	489	441	587	349	281	420	346	356	407	521	516	619	494	614	494	420
ENSMUSG00000104291	TEC	A130071D04Rik	overlapping_locus	chr1	138161820	138167683	5864	-	8	4	3	7	1	5	1	3	6	4	1	1	4	3	6	2	4
ENSMUSG00000026394	protein_coding	Atp6v1g3		chr1	138273738	138289462	15725	+	0	0	2	0	2	0	0	1	1	1	1	2	0	0	0	3	1
ENSMUSG00000026393	protein_coding	Nek7	overlapping_locus	chr1	138482875	138620141	137267	-	2105	2398	2778	2719	2391	2335	2570	2641	2829	2544	2482	2294	2590	2335	2620	2491	2211
ENSMUSG00000099510	lncRNA	Gm28501		chr1	138515615	138550009	34395	+	0	0	1	0	0	0	0	0	0	0	0	0	0	0	0	0	0
ENSMUSG00000102651	TEC	Gm37080	overlapping_locus	chr1	138552305	138554708	2404	-	0	0	0	1	0	0	0	0	0	0	0	1	0	0	0	0	0
ENSMUSG00000102448	TEC	Gm37101	overlapping_locus	chr1	138567697	138571356	3660	-	0	1	0	0	0	0	0	1	0	2	0	3	0	0	1	0	0
ENSMUSG00000100459	lncRNA	Gm5833		chr1	138640095	138682077	41983	-	1	1	0	1	2	0	0	0	1	0	0	0	0	0	0	0	0
ENSMUSG00000103152	processed_pseudogene	Gm8790		chr1	138689524	138689845	322	-	0	0	0	0	0	0	0	0	0	0	0	0	0	0	0	0	0
ENSMUSG00000019230	protein_coding	Lhx9		chr1	138825186	138848577	23392	-	2	0	1	2	1	1	2	1	3	0	0	0	2	2	0	0	1
ENSMUSG00000079283	protein_coding	2310009B15Rik		chr1	138851983	138856852	4870	-	142	123	133	128	121	115	116	124	148	145	148	108	120	135	145	140	130
ENSMUSG00000103850	processed_pseudogene	Gm3933	pseudo_consens	chr1	138915605	138916043	439	-	2	0	1	1	0	0	0	0	0	0	2	0	1	0	0	0	0
ENSMUSG00000102365	TEC	Gm37045		chr1	138960441	138962903	2463	-	0	1	4	3	4	1	3	2	3	5	3	2	3	2	3	0	5
ENSMUSG00000056268	protein_coding	Dennd1b	overlapping_locus	chr1	138963435	139178960	215526	+	411	470	422	717	401	352	458	380	427	322	369	411	501	403	398	342	342
ENSMUSG00000104436	lncRNA	Gm37423	overlapping_locus	chr1	138968510	138971851	3342	+	0	0	0	1	1	0	0	0	0	0	1	0	1	0	0	1	1
ENSMUSG00000104900	lncRNA	4930596I21Rik	overlapping_locus	chr1	138977656	138979246	1591	+	0	1	1	0	0	0	0	0	0	0	0	0	0	0	0	0	1
ENSMUSG00000102626	processed_pseudogene	Gm18553	pseudo_consens	chr1	138983864	138984497	634	-	0	0	0	0	0	0	0	0	0	0	1	0	0	0	0	0	1
ENSMUSG00000085361	processed_pseudogene	Gm16305	pseudo_consens	chr1	138991514	138992069	556	-	3	2	3	2	3	1	6	2	0	3	5	1	2	3	3	1	0
ENSMUSG00000102157	TEC	Gm37470	overlapping_locus	chr1	139030185	139032982	2798	+	0	0	0	0	1	0	0	0	0	1	1	0	0	0	0	0	0
ENSMUSG00000105936	TEC	Gm43544	overlapping_locus	chr1	139070213	139072684	2472	+	0	1	0	1	0	0	1	0	0	0	0	0	0	0	0	0	0
ENSMUSG00000102451	TEC	Gm37655		chr1	139082862	139086984	4123	-	0	0	0	0	0	0	0	0	0	0	0	0	1	0	1	0	0
ENSMUSG00000102243	TEC	Gm37718	overlapping_locus	chr1	139155152	139157782	2631	+	0	2	1	1	1	0	1	2	0	1	4	1	4	0	0	2	1
ENSMUSG00000103844	lncRNA	4933436E23Rik		chr1	139379452	139402852	23401	+	0	0	0	0	0	0	1	0	0	0	0	0	0	0	0	0	0
ENSMUSG00000102661	lncRNA	Gm34816		chr1	139408278	139413864	5587	+	0	0	0	0	0	0	0	1	0	0	0	0	0	0	0	0	0
ENSMUSG00000033964	protein_coding	Zbtb41		chr1	139422288	139453005	30718	+	713	797	844	913	764	761	906	691	842	745	646	654	773	732	789	752	647
ENSMUSG00000033952	protein_coding	Aspm		chr1	139454772	139494091	39320	+	288	347	403	382	230	221	211	176	266	241	175	252	329	262	217	189	210
ENSMUSG00000070594	protein_coding	Gm4788		chr1	139697623	139781243	83621	-	0	0	0	0	0	1	0	1	0	1	0	0	0	0	0	0	0
ENSMUSG00000033898	protein_coding	Cfhr2		chr1	139804167	139858718	54552	-	0	0	0	0	0	0	0	0	0	0	0	0	0	0	0	0	0
ENSMUSG00000089991	unprocessed_pseudogene	Gm16332	overlapping_locus	chr1	139862957	139936477	73521	-	0	1	0	3	1	0	1	0	0	1	0	0	1	0	1	1	2
ENSMUSG00000104496	processed_pseudogene	Gm5837	overlapping_locus	chr1	139928240	139929608	1369	-	1	2	4	5	2	5	2	4	3	2	0	2	3	0	3	6	3
ENSMUSG00000085867	unprocessed_pseudogene	Gm5834		chr1	139939601	139994205	54605	-	3	0	1	2	1	0	0	1	2	1	2	2	5	4	1	0	1
ENSMUSG00000102905	processed_pseudogene	Gm38266	pseudo_consens	chr1	140000549	140000969	421	+	0	0	0	0	0	0	0	1	0	0	0	0	1	0	0	0	0
ENSMUSG00000026365	protein_coding	Cfh		chr1	140084708	140183764	99057	-	140	193	145	368	156	123	233	175	254	193	193	208	329	265	235	228	221
ENSMUSG00000052726	protein_coding	Kcnt2	overlapping_locus	chr1	140246158	140612067	365910	+	14	13	5	17	5	6	9	11	10	6	5	14	17	13	12	12	14
ENSMUSG00000102698	TEC	Gm37777	overlapping_locus	chr1	140266487	140269852	3366	+	0	0	0	0	0	0	0	0	0	0	0	0	1	0	0	0	0
ENSMUSG00000102368	lncRNA	4930590L20Rik		chr1	140570176	140656404	86229	-	0	0	0	0	0	0	0	0	0	0	0	1	0	0	0	0	0
ENSMUSG00000102500	TEC	Gm37371		chr1	140823327	140823718	392	+	0	0	0	0	0	0	0	0	1	0	0	0	0	0	0	0	0
ENSMUSG00000104147	TEC	Gm37142		chr1	141420037	141423146	3110	-	0	0	1	0	0	0	0	1	0	0	0	0	0	0	0	0	0
ENSMUSG00000101795	processed_pseudogene	Gm5835	pseudo_consens	chr1	143093347	143094616	1270	-	47	56	58	52	57	63	70	60	60	49	63	43	45	49	72	57	56
ENSMUSG00000026361	protein_coding	Cdc73		chr1	143598800	143702893	104094	-	883	1152	1239	1208	1132	1027	1224	1011	986	957	1023	1093	1136	963	1080	1007	917
ENSMUSG00000033849	protein_coding	B3galt2		chr1	143640664	143654614	13951	+	142	209	188	312	221	166	295	236	266	297	283	278	413	282	310	300	242
ENSMUSG00000089640	processed_pseudogene	Gm6397	pseudo_consens	chr1	143683230	143684298	1069	+	0	0	1	0	1	0	0	0	1	1	1	0	0	0	0	0	0
ENSMUSG00000018196	protein_coding	Glrx2		chr1	143716338	143749676	33339	+	858	815	985	913	786	736	835	793	887	889	865	780	823	786	883	857	782
ENSMUSG00000018199	protein_coding	Ro60		chr1	143750790	143777068	26279	-	908	1001	1293	1101	868	893	880	879	994	955	1068	970	1294	919	1284	962	952
ENSMUSG00000018189	protein_coding	Uchl5	overlapping_locus	chr1	143777272	143807466	30195	+	1126	1027	1324	1198	1148	967	1031	1051	961	964	1034	844	988	945	1043	859	824
ENSMUSG00000100455	lncRNA	Gm29170	overlapping_locus	chr1	143777642	143781307	3666	+	67	70	71	74	66	58	78	70	87	70	40	59	81	64	51	63	47
ENSMUSG00000026360	protein_coding	Rgs2		chr1	143999338	144004161	4824	-	318	318	297	392	296	254	374	294	352	310	388	350	324	432	451	343	331
ENSMUSG00000051079	protein_coding	Rgs13		chr1	144138654	144177372	38719	-	8	6	1	8	1	4	3	3	6	2	9	4	3	6	6	3	8
ENSMUSG00000100389	processed_pseudogene	Rbm6-ps2		chr1	144221979	144223650	1672	-	0	0	0	0	0	0	0	0	0	0	0	0	0	0	0	0	2
ENSMUSG00000026358	protein_coding	Rgs1		chr1	144242296	144249242	6947	-	17	13	16	10	9	5	17	6	9	12	14	12	21	10	15	5	8
ENSMUSG00000100441	processed_pseudogene	Gm7266	pseudo_consens	chr1	144312032	144312436	405	-	23	8	11	12	12	24	14	18	26	14	20	6	5	9	12	12	12
ENSMUSG00000026357	protein_coding	Rgs18		chr1	144752683	144775435	22753	-	148	135	141	174	110	144	188	152	236	172	220	158	153	250	222	174	183
ENSMUSG00000101049	processed_pseudogene	Gm8856	pseudo_consens	chr1	144952928	144954071	1144	+	0	0	0	0	1	0	0	1	0	1	0	0	0	1	0	0	0
ENSMUSG00000099617	processed_pseudogene	Gm6550	pseudo_consens	chr1	145164951	145165943	993	-	0	1	1	0	1	0	0	1	0	1	0	1	0	0	0	1	0
ENSMUSG00000097130	processed_pseudogene	Gm5262	pseudo_consens	chr1	145183894	145184889	996	+	2	5	6	4	1	3	4	1	2	3	5	0	0	6	2	0	0
ENSMUSG00000101661	processed_pseudogene	Gm28392	pseudo_consens	chr1	145315156	145315548	393	-	0	0	0	0	0	0	0	0	0	0	1	0	0	0	0	0	0
ENSMUSG00000099964	lncRNA	Gm29514	overlapping_locus	chr1	146419436	146495060	75625	-	1	0	0	0	0	0	1	0	0	0	0	1	0	0	0	0	0
ENSMUSG00000090323	processed_pseudogene	Gm5263	pseudo_consens	chr1	146420436	146421036	601	+	0	0	0	0	0	0	0	1	0	0	0	0	0	0	0	0	0
ENSMUSG00000035131	protein_coding	Brinp3	overlapping_locus	chr1	146494760	146902472	407713	+	0	3	0	3	0	0	1	0	0	0	0	0	0	3	0	3	1
ENSMUSG00000080078	processed_pseudogene	Gm15583	overlapping_locus	chr1	146725581	146729090	3510	+	0	0	0	0	0	1	0	0	1	0	0	0	0	0	0	0	0
ENSMUSG00000101973	processed_pseudogene	Gm29516	pseudo_consens	chr1	147990085	147990552	468	+	0	0	0	0	0	0	0	0	0	0	0	0	0	0	0	0	0
ENSMUSG00000101735	processed_pseudogene	Gm18505	pseudo_consens	chr1	148650345	148651134	790	-	1	3	0	0	1	0	0	2	1	2	3	1	1	1	1	2	0
ENSMUSG00000099842	processed_pseudogene	Gm4034	pseudo_consens	chr1	148937897	148938376	480	-	1	2	0	0	1	0	2	2	1	0	2	0	0	1	1	0	2
ENSMUSG00000101564	processed_pseudogene	Gm5703	pseudo_consens	chr1	148975522	148979494	3973	+	0	1	1	0	0	0	0	0	0	0	0	0	0	0	0	0	1
ENSMUSG00000082588	processed_pseudogene	Gm15443		chr1	149025228	149026047	820	-	0	0	0	0	0	0	0	0	0	0	0	0	0	0	0	0	0
ENSMUSG00000056220	protein_coding	Pla2g4a		chr1	149829618	149961290	131673	-	670	704	1461	810	629	563	768	766	684	679	741	625	838	758	770	801	744
ENSMUSG00000099701	processed_pseudogene	Gm19136	pseudo_consens	chr1	150022190	150024256	2067	-	0	1	1	0	0	0	0	0	0	0	0	0	0	0	0	0	0
ENSMUSG00000097028	lncRNA	Ptgs2os		chr1	150074873	150099963	25091	-	1	0	1	0	0	0	2	0	0	0	1	0	1	0	0	0	0
ENSMUSG00000032487	protein_coding	Ptgs2		chr1	150100031	150108227	8197	+	22	33	119	35	22	66	63	22	21	41	20	50	39	12	14	19	19
ENSMUSG00000101199	processed_pseudogene	Gm9687	pseudo_consens	chr1	150145968	150146569	602	+	0	0	0	0	0	0	0	1	0	0	0	0	0	0	1	0	0
ENSMUSG00000097754	lncRNA	Ptgs2os2		chr1	150159043	150164948	5906	-	3	0	2	1	0	1	0	0	1	2	1	1	4	1	3	1	0
ENSMUSG00000099875	processed_pseudogene	Rbm3-ps		chr1	150265535	150265999	465	-	6	6	5	3	5	3	11	7	7	2	5	6	5	4	4	5	2
ENSMUSG00000006007	protein_coding	Pdc	overlapping_locus	chr1	150319417	150333906	14490	+	0	0	0	1	0	1	0	0	0	0	0	0	2	0	0	0	1
ENSMUSG00000099447	lncRNA	2310030A07Rik		chr1	150320681	150346771	26091	-	1	0	0	0	0	0	0	0	0	0	0	0	0	0	0	0	0
ENSMUSG00000006010	protein_coding	Odr4		chr1	150361305	150393080	31776	-	812	944	954	1111	1059	897	975	922	948	874	913	828	959	864	990	834	848
ENSMUSG00000006005	protein_coding	Tpr		chr1	150392838	150449935	57098	+	1928	2915	3448	3001	2582	2163	2534	2237	2130	2227	2204	2455	3151	2069	2339	2416	2316
ENSMUSG00000006014	protein_coding	Prg4		chr1	150449412	150466165	16754	-	264	385	621	545	271	390	494	343	413	700	563	736	1099	262	356	530	417
ENSMUSG00000066842	protein_coding	Hmcn1		chr1	150562524	150993435	430912	-	185	320	270	374	243	193	255	200	226	224	265	297	420	249	269	282	268
ENSMUSG00000093650	lncRNA	Gm20631		chr1	150625266	150783499	158234	+	0	0	1	0	0	0	0	0	0	0	0	0	1	0	0	0	0
ENSMUSG00000102628	TEC	Gm37671		chr1	151080450	151082545	2096	+	7	1	4	4	3	4	3	3	1	4	3	3	4	0	1	2	2
ENSMUSG00000100595	processed_pseudogene	Gm19087	pseudo_consens	chr1	151107915	151108860	946	+	0	0	0	0	0	1	0	0	0	0	0	0	0	0	0	0	0
ENSMUSG00000097426	processed_pseudogene	Gm8941	pseudo_consens	chr1	151136507	151137780	1274	+	12	7	7	1	6	7	3	3	5	6	7	6	6	0	4	0	5
ENSMUSG00000102095	lncRNA	C730036E19Rik		chr1	151138034	151142345	4312	+	0	0	0	0	0	0	0	0	0	0	0	0	1	0	0	0	0
ENSMUSG00000114212	protein_coding	Gm47985	retrogene	chr1	151182537	151184243	1707	+	0	0	0	0	0	0	0	0	0	0	0	0	1	0	0	0	0
ENSMUSG00000114943	protein_coding	Gm8947	retrogene	chr1	151192376	151194054	1679	+	0	0	0	0	0	0	0	0	0	0	0	0	0	0	0	2	0
ENSMUSG00000114582	protein_coding	3110040M04Rik	retrogene	chr1	151204121	151205065	945	+	2	0	0	0	0	0	0	0	0	0	0	0	0	0	0	0	0
ENSMUSG00000088498	snRNA	Gm24402		chr1	151260824	151260914	91	-	0	0	0	0	0	0	1	1	0	0	0	0	0	1	0	0	0
ENSMUSG00000100954	lncRNA	Gm10138		chr1	151339604	151345231	5628	-	48	51	75	57	31	33	50	59	67	46	43	56	55	32	51	35	39
ENSMUSG00000023150	protein_coding	Ivns1abp		chr1	151344477	151364422	19946	+	6516	7038	8552	10433	6374	6301	7622	6933	7723	7395	6602	7498	8074	7798	7835	8484	7369
ENSMUSG00000052748	protein_coding	Swt1		chr1	151367699	151428455	60757	-	289	314	317	361	232	256	313	215	315	296	307	295	317	315	321	318	295
ENSMUSG00000053286	protein_coding	Trmt1l	ncRNA_host	chr1	151428542	151458161	29620	+	252	248	307	324	166	194	217	230	265	252	249	285	312	294	317	300	273
ENSMUSG00000106406	miRNA	Mir7682		chr1	151442393	151442450	58	+	1	0	0	0	0	0	0	0	0	0	0	0	0	0	0	0	0
ENSMUSG00000103928	TEC	Gm37893		chr1	151445305	151447741	2437	+	12	22	16	26	9	11	19	12	26	12	17	18	14	17	13	18	9
ENSMUSG00000026484	protein_coding	Rnf2		chr1	151458004	151500955	42952	-	883	941	1063	1111	950	971	1045	976	974	964	987	964	1013	930	1027	907	792
ENSMUSG00000103238	TEC	Gm36527		chr1	151496557	151499585	3029	-	1	3	2	4	1	1	0	3	5	0	0	0	4	1	1	3	2
ENSMUSG00000100981	processed_pseudogene	Gm29072	pseudo_consens	chr1	151509224	151510092	869	+	0	0	0	1	0	0	0	0	0	0	0	0	0	0	0	1	0
ENSMUSG00000100551	processed_pseudogene	Gm19503	pseudo_consens	chr1	151520447	151520687	241	-	2	4	3	2	8	5	5	6	8	6	6	6	3	7	3	7	7
ENSMUSG00000026483	protein_coding	Fam129a		chr1	151571186	151721939	150754	+	547	981	774	899	751	627	843	582	669	698	947	883	1114	699	1026	909	899
ENSMUSG00000100594	lncRNA	2810414N06Rik		chr1	151748949	151755018	6070	-	8	18	22	10	10	14	9	18	22	16	11	13	16	27	20	18	14
ENSMUSG00000043019	protein_coding	Edem3		chr1	151755371	151822051	66681	+	1513	1962	2169	1916	1856	1496	1843	1620	1734	1622	1488	1654	2044	1524	1697	1633	1553
ENSMUSG00000032666	protein_coding	1700025G04Rik	ncRNA_host	chr1	151852403	152090125	237723	-	1354	1764	1814	1833	1790	1458	1687	1690	1544	1588	1610	1552	1636	1428	1723	1706	1499
ENSMUSG00000084557	snRNA	Gm25279		chr1	151854823	151854955	133	-	0	0	0	0	0	0	0	1	0	0	0	1	1	0	2	2	0
ENSMUSG00000102090	processed_pseudogene	Gm8964	pseudo_consens	chr1	152128585	152129389	805	+	0	0	0	1	2	0	2	1	0	2	1	0	1	0	1	0	0
ENSMUSG00000014980	protein_coding	Tsen15		chr1	152370735	152386688	15954	-	102	70	99	124	73	98	88	88	131	113	115	100	93	121	96	121	93
ENSMUSG00000032649	protein_coding	Colgalt2		chr1	152399830	152510695	110866	+	114	190	168	203	107	147	172	170	184	264	291	288	311	154	235	189	194
ENSMUSG00000080878	processed_pseudogene	Gm15618	pseudo_consens	chr1	152407074	152407525	452	-	0	0	0	0	0	0	0	0	0	0	1	0	0	0	0	0	0
ENSMUSG00000026482	protein_coding	Rgl1	overlapping_locus	chr1	152516760	152766351	249592	-	325	511	411	726	367	320	442	388	424	430	483	453	664	482	533	501	458
ENSMUSG00000086145	lncRNA	Gm15479	overlapping_locus	chr1	152684026	152687501	3476	-	0	0	0	0	0	0	0	0	0	0	0	0	2	0	0	0	0
ENSMUSG00000080950	processed_pseudogene	Gm7278	overlapping_locus	chr1	152729159	152730559	1401	-	2	0	3	1	4	1	3	1	0	1	3	3	2	0	1	5	3
ENSMUSG00000055547	protein_coding	Apobec4		chr1	152750551	152757544	6994	+	0	0	0	0	0	0	0	0	0	0	0	0	0	0	0	0	0
ENSMUSG00000008475	protein_coding	Arpc5		chr1	152766542	152775597	9056	+	3372	3071	3970	3563	3052	2942	3368	3112	3684	3394	3449	3005	3355	3379	3682	3173	2846
ENSMUSG00000026480	protein_coding	Ncf2		chr1	152800194	152836991	36798	+	117	125	110	161	125	100	128	103	116	112	149	128	145	147	143	121	124
ENSMUSG00000042772	protein_coding	Smg7		chr1	152836995	152902646	65652	-	1057	1417	1587	1541	1280	1090	1290	1056	1150	1082	1135	1160	1499	1135	1353	1348	1137
ENSMUSG00000100394	lncRNA	Gm28791		chr1	152878520	152880298	1779	-	0	0	2	0	0	0	1	1	0	1	0	0	2	0	0	1	1
ENSMUSG00000103840	TEC	1700040K01Rik		chr1	152936604	152937041	438	+	0	0	0	0	0	0	0	0	0	0	0	0	1	0	0	0	0
ENSMUSG00000100702	processed_pseudogene	Gm8976	pseudo_consens	chr1	152949395	152950097	703	-	9	12	10	12	7	7	9	8	10	12	4	7	6	13	6	10	8
ENSMUSG00000042751	protein_coding	Nmnat2		chr1	152954993	153119261	164269	+	33	50	22	60	30	40	36	47	46	23	44	26	35	28	39	39	29
ENSMUSG00000026479	protein_coding	Lamc2		chr1	153122756	153186447	63692	-	1518	2147	3327	1959	1757	1754	1907	1723	1670	1804	1779	2029	2134	1494	1815	1708	1474
ENSMUSG00000026478	protein_coding	Lamc1		chr1	153218922	153332786	113865	-	1361	2639	2599	2521	2022	1635	2217	1719	1582	1948	1781	2015	3200	1681	2322	1994	2046
ENSMUSG00000103818	TEC	Gm38009		chr1	153283850	153287190	3341	-	0	0	2	0	0	0	0	1	0	1	0	2	0	1	0	2	0
ENSMUSG00000079138	processed_pseudogene	Gm8818	pseudo_consens	chr1	153305432	153306478	1047	+	0	0	0	0	0	0	0	1	2	1	0	2	1	0	0	0	0
ENSMUSG00000073538	lncRNA	E330020D12Rik		chr1	153404827	153414233	9407	-	6	5	1	4	4	2	2	5	2	2	1	1	4	0	0	0	4
ENSMUSG00000042708	protein_coding	Shcbp1l	ncRNA_host	chr1	153425162	153452574	27413	+	2	7	6	11	7	1	2	3	3	3	7	5	5	12	4	8	3
ENSMUSG00000064435	snoRNA	Gm25588		chr1	153440079	153440218	140	+	0	0	0	0	0	1	0	0	0	0	0	0	1	0	0	0	1
ENSMUSG00000103543	TEC	Gm37669		chr1	153443481	153444300	820	+	1	1	0	6	1	4	0	1	2	1	1	3	3	2	1	0	4
ENSMUSG00000042699	protein_coding	Dhx9		chr1	153455758	153487660	31903	-	2095	3201	4568	3201	2688	2368	2947	2421	2050	2170	2322	2716	3362	2211	2608	2763	2595
ENSMUSG00000042684	protein_coding	Npl		chr1	153503015	153550045	47031	-	1553	1426	2479	1809	1572	1573	1815	1713	1917	1487	1525	1496	1734	1813	2370	1921	1833
ENSMUSG00000099858	processed_pseudogene	Gm6652	pseudo_consens	chr1	153619604	153620673	1070	-	1	4	6	12	10	3	5	5	6	7	6	4	4	5	13	5	2
ENSMUSG00000042671	protein_coding	Rgs8		chr1	153653025	153700323	47299	+	5	5	4	1	3	3	6	5	2	1	0	7	4	3	4	8	8
ENSMUSG00000102404	TEC	5530400K19Rik		chr1	153714654	153716569	1916	+	0	0	0	0	0	0	0	0	0	0	0	0	0	0	1	0	0
ENSMUSG00000100334	lncRNA	C230024C17Rik		chr1	153721240	153737829	16590	-	1	0	0	0	0	0	1	0	0	0	2	0	0	0	0	1	0
ENSMUSG00000026475	protein_coding	Rgs16		chr1	153740349	153745468	5120	+	59	94	46	61	71	60	76	47	58	51	50	74	66	63	92	74	80
ENSMUSG00000099568	lncRNA	Gm28513		chr1	153743552	153749324	5773	-	0	0	0	0	0	0	0	1	1	0	0	1	0	2	0	0	0
ENSMUSG00000066800	protein_coding	Rnasel		chr1	153749426	153764221	14796	+	195	206	132	341	115	118	170	181	175	159	194	190	305	202	224	196	157
ENSMUSG00000100183	lncRNA	Gm28512		chr1	153750682	153751547	866	+	4	0	2	3	0	0	0	0	0	0	2	2	2	1	1	1	2
ENSMUSG00000042641	protein_coding	Rgsl1		chr1	153779381	153844142	64762	-	2	4	2	12	4	3	7	3	7	4	3	6	6	6	5	8	6
ENSMUSG00000045968	protein_coding	Teddm2		chr1	153849542	153900228	50687	-	55	67	49	84	67	83	66	94	83	76	71	71	74	51	36	55	46
ENSMUSG00000043282	protein_coding	Teddm1b		chr1	153874345	153876871	2527	+	0	0	0	0	0	0	2	0	1	0	0	5	1	1	1	0	1
ENSMUSG00000102459	TEC	Gm38352		chr1	153889741	153892297	2557	-	2	2	3	5	2	6	4	2	3	5	1	6	4	4	2	3	1
ENSMUSG00000047053	protein_coding	Teddm1a		chr1	153891742	153893058	1317	+	0	0	0	1	0	1	0	0	0	0	0	2	0	1	0	0	0
ENSMUSG00000026473	protein_coding	Glul		chr1	153899944	153909723	9780	+	5706	6586	5412	7552	6388	6187	6056	5522	5704	6303	5441	5347	6624	5164	6587	5220	5714
ENSMUSG00000100014	lncRNA	Gm29290		chr1	153939226	153941290	2065	+	0	0	0	0	0	0	0	0	0	0	0	0	0	0	0	0	0
ENSMUSG00000101903	lncRNA	Gm29291		chr1	154003396	154006221	2826	-	3	11	0	13	8	9	9	11	8	10	10	4	11	3	10	8	5
ENSMUSG00000100502	lncRNA	Gm28286		chr1	154027363	154034301	6939	-	10	8	6	25	6	12	10	12	12	16	10	17	8	6	19	12	15
ENSMUSG00000100627	lncRNA	A830008E24Rik	ncRNA_host	chr1	154037597	154117951	80355	-	32	37	22	63	34	45	35	64	47	57	46	41	38	33	44	34	48
ENSMUSG00000088669	snoRNA	Gm25336		chr1	154080095	154080199	105	-	0	0	0	2	0	0	0	1	0	0	0	0	0	0	0	0	0
ENSMUSG00000066797	protein_coding	Zfp648		chr1	154201187	154205689	4503	+	16	21	10	18	19	9	20	32	17	6	19	16	12	15	43	23	12
ENSMUSG00000004110	protein_coding	Cacna1e		chr1	154390731	154884501	493771	-	191	303	259	433	206	204	316	245	313	181	282	374	288	358	335	338	332
ENSMUSG00000101880	lncRNA	Gm29282		chr1	155011332	155057179	45848	-	0	0	0	0	0	1	0	0	0	0	0	0	1	0	1	1	0
ENSMUSG00000101433	processed_pseudogene	Gm29441	pseudo_consens	chr1	155031739	155031949	211	+	0	0	0	0	0	0	0	0	0	0	0	0	0	0	0	0	1
ENSMUSG00000096950	lncRNA	Gm9530		chr1	155063447	155083266	19820	-	19	17	24	25	5	17	16	26	24	17	19	10	15	31	24	24	22
ENSMUSG00000056708	protein_coding	Ier5		chr1	155096361	155099636	3276	-	628	613	722	612	633	510	641	547	549	554	617	620	795	618	774	613	485
ENSMUSG00000026471	protein_coding	Mr1		chr1	155127277	155146814	19538	-	410	438	492	561	391	346	411	436	470	440	444	502	527	391	525	480	393
ENSMUSG00000026470	protein_coding	Stx6	overlapping_locus	chr1	155158715	155208256	49542	+	1443	1669	1766	1661	1492	1313	1630	1327	1515	1399	1337	1267	1516	1349	1686	1448	1260
ENSMUSG00000104181	processed_pseudogene	Gm8850	overlapping_locus	chr1	155179801	155180388	588	+	3	6	3	3	3	4	2	1	1	1	1	1	4	5	0	4	2
ENSMUSG00000033722	protein_coding	BC034090		chr1	155212471	155244444	31974	-	67	80	85	114	72	51	70	77	58	61	73	114	91	103	134	112	81
ENSMUSG00000103670	lncRNA	Gm37622		chr1	155231304	155233159	1856	+	0	0	1	0	0	0	0	0	0	0	0	0	0	1	0	2	0
ENSMUSG00000026469	protein_coding	Xpr1		chr1	155275701	155417415	141715	-	716	1051	1122	1064	947	878	966	822	769	847	877	918	1120	667	970	814	823
ENSMUSG00000073535	lncRNA	Gm5532		chr1	155520173	155527143	6971	-	17	18	19	42	19	23	23	19	23	21	15	15	18	14	6	25	10
ENSMUSG00000033701	protein_coding	Acbd6		chr1	155558120	155691330	133211	+	1922	2183	2446	1980	2470	2320	2412	2382	2455	2510	2177	2295	2092	2564	2712	2210	2372
ENSMUSG00000026468	protein_coding	Lhx4		chr1	155698031	155751684	53654	-	0	0	0	0	0	2	1	0	0	0	0	0	0	0	0	0	0
ENSMUSG00000103180	processed_pseudogene	Gm37089		chr1	155766146	155766274	129	+	1	0	0	0	0	0	0	0	0	0	0	0	0	0	0	0	0
ENSMUSG00000033684	protein_coding	Qsox1		chr1	155776029	155812889	36861	-	2599	2741	2787	2529	2434	2297	2607	2346	2779	2243	2257	2160	2297	2584	2859	2507	2414
ENSMUSG00000102299	TEC	Gm37539		chr1	155789124	155789358	235	+	0	0	0	1	0	0	0	1	1	0	1	0	0	1	0	1	1
ENSMUSG00000102558	lncRNA	Gm37571		chr1	155818494	155859591	41098	+	0	0	0	1	1	0	0	0	0	0	0	1	0	0	0	0	0
ENSMUSG00000033671	protein_coding	Cep350		chr1	155844964	155973255	128292	-	1094	1728	1947	1903	1386	1170	1458	1118	1293	1244	1403	1427	1795	1191	1442	1510	1241
ENSMUSG00000103717	processed_pseudogene	Gm38038	pseudo_consens	chr1	155855449	155855707	259	+	0	4	1	1	0	0	0	1	1	1	0	0	3	0	0	2	0
ENSMUSG00000103771	processed_pseudogene	Gm36934	pseudo_consens	chr1	155864960	155865265	306	+	0	0	1	0	1	1	0	0	0	0	1	0	1	1	0	0	1
ENSMUSG00000102837	TEC	Gm37383		chr1	155881802	155882546	745	-	0	0	0	0	0	0	1	0	0	0	0	1	0	0	0	0	0
ENSMUSG00000102833	TEC	Gm9694		chr1	155973318	155974506	1189	+	3	1	4	3	1	0	0	0	1	2	0	1	2	2	3	1	3
ENSMUSG00000026466	protein_coding	Tor1aip1		chr1	156004599	156036480	31882	-	1288	1685	1572	1820	1662	1515	1660	1438	1395	1514	1495	1496	1790	1315	1502	1511	1368
ENSMUSG00000102964	TEC	9430034N14Rik		chr1	156026223	156030007	3785	-	7	5	7	9	14	8	9	15	3	6	3	13	14	8	8	7	8
ENSMUSG00000050565	protein_coding	Tor1aip2		chr1	156035403	156068861	33459	+	1951	2426	2731	2495	2274	2091	2313	1973	1900	2224	2158	2090	2385	2054	2241	2249	1989
ENSMUSG00000015484	protein_coding	Fam163a		chr1	156075966	156205026	129061	-	2	1	3	1	0	4	3	1	4	0	2	0	0	3	0	1	2
ENSMUSG00000060985	protein_coding	Tdrd5		chr1	156255296	156303664	48369	-	8	6	4	7	0	9	5	8	6	3	1	9	7	12	3	11	9
ENSMUSG00000102372	TEC	A430050A11Rik		chr1	156290102	156290747	646	-	0	0	0	0	0	0	0	0	0	0	0	0	0	0	0	0	0
ENSMUSG00000103705	lncRNA	4930518J20Rik		chr1	156303489	156304966	1478	+	0	0	0	0	0	1	0	0	0	0	0	0	0	0	0	0	1
ENSMUSG00000026602	protein_coding	Nphs2		chr1	156310727	156328035	17309	+	2	3	2	3	2	3	4	5	3	5	6	1	1	8	2	3	1
ENSMUSG00000026601	protein_coding	Axdnd1		chr1	156323509	156421159	97651	-	17	10	10	18	9	15	12	20	10	11	14	17	19	13	16	21	25
ENSMUSG00000078193	protein_coding	Gm2000		chr1	156366040	156366484	445	+	136	81	93	107	66	79	88	86	118	58	66	33	49	98	97	104	36
ENSMUSG00000026600	protein_coding	Soat1		chr1	156424525	156474331	49807	-	7257	9386	8875	8112	10504	9098	9758	7415	7069	9060	9549	7867	9373	8519	7282	8065	8509
ENSMUSG00000103199	TEC	Gm37648		chr1	156455290	156457852	2563	+	5	7	5	6	5	5	6	2	2	3	7	0	4	4	5	7	9
ENSMUSG00000101523	processed_pseudogene	Csnk2a3		chr1	156524012	156526644	2633	+	10	7	13	13	5	12	8	13	11	10	13	10	15	9	12	13	11
ENSMUSG00000026596	protein_coding	Abl2		chr1	156558786	156649568	90783	+	603	869	1029	900	807	684	829	626	613	691	649	782	837	542	693	715	599
ENSMUSG00000104293	TEC	Gm38043		chr1	156583108	156588248	5141	+	2	4	0	5	0	1	0	0	2	2	0	1	0	2	0	2	1
ENSMUSG00000060519	protein_coding	Tor3a		chr1	156653617	156674356	20740	-	551	698	682	596	576	545	614	556	672	595	701	607	728	615	785	642	635
ENSMUSG00000033557	protein_coding	Fam20b		chr1	156678532	156719086	40555	-	2103	2657	2983	2548	2407	2303	2572	2339	2507	2479	2629	2447	2765	2275	3005	2700	2305
ENSMUSG00000046057	processed_pseudogene	Gm15428		chr1	156793512	156793844	333	+	1	0	0	0	0	0	0	0	0	0	0	0	0	0	1	0	0
ENSMUSG00000026594	protein_coding	Ralgps2	overlapping_locus	chr1	156804166	156939626	135461	-	1302	1543	1884	1666	1459	1216	1425	1267	1298	1314	1360	1257	1451	1218	1385	1303	1207
ENSMUSG00000101964	transcribed_processed_pseudogene	Gm28693	overlapping_locus	chr1	156835287	156837924	2638	-	2	4	1	0	0	2	2	3	0	2	1	3	2	0	0	6	1
ENSMUSG00000033544	protein_coding	Angptl1		chr1	156838562	156861078	22517	+	61	111	65	112	96	68	109	108	80	104	145	124	139	91	158	107	118
ENSMUSG00000103303	TEC	Gm37802	overlapping_locus	chr1	156856217	156858859	2643	-	2	3	3	0	2	1	0	4	3	2	3	3	4	0	0	3	2
ENSMUSG00000102960	TEC	Gm37943	overlapping_locus	chr1	156872177	156876120	3944	-	0	0	2	1	0	2	0	0	0	0	0	0	2	0	1	0	0
ENSMUSG00000101905	lncRNA	4930439D14Rik		chr1	156939838	156940196	359	+	0	4	2	4	1	1	1	3	0	3	2	4	6	6	3	4	2
ENSMUSG00000101768	lncRNA	Gm28694		chr1	156972760	157054034	81275	-	0	1	0	0	0	0	0	0	0	0	0	0	0	0	0	0	0
ENSMUSG00000026592	protein_coding	Tex35		chr1	157099139	157108680	9542	-	1	1	0	1	0	0	0	0	0	2	1	5	3	1	1	1	2
ENSMUSG00000109913	unitary_pseudogene	Gm30694		chr1	157118948	157134399	15452	+	0	0	1	2	0	1	0	0	1	1	1	0	1	1	1	2	2
ENSMUSG00000070565	protein_coding	Rasal2	overlapping_locus	chr1	157135182	157412595	277414	-	733	1092	1153	1154	896	830	972	807	866	761	848	914	1061	806	943	879	852
ENSMUSG00000102326	TEC	Gm37788		chr1	157347339	157350043	2705	-	1	0	0	0	0	0	0	0	0	0	0	0	1	0	0	0	0
ENSMUSG00000102391	TEC	Gm37578		chr1	157354474	157355650	1177	-	0	0	0	0	0	0	0	0	0	0	0	0	0	2	0	0	0
ENSMUSG00000087632	processed_pseudogene	Gm6058	overlapping_locus	chr1	157383931	157384329	399	-	4	3	1	5	2	2	4	0	2	8	2	1	1	0	1	6	0
ENSMUSG00000103808	TEC	Gm37060		chr1	157404325	157406721	2397	-	1	1	0	0	1	0	0	0	0	0	1	1	0	1	0	1	0
ENSMUSG00000049881	transcribed_processed_pseudogene	2810025M15Rik	pseudo_consens	chr1	157412352	157420236	7885	+	457	484	464	469	481	432	381	451	481	524	501	390	414	479	492	445	384
ENSMUSG00000033488	protein_coding	Cryzl2		chr1	157458577	157492638	34062	+	89	97	137	146	122	117	108	117	137	92	117	91	98	124	194	126	122
ENSMUSG00000087093	lncRNA	Gm15486		chr1	157497931	157511721	13791	-	0	0	1	0	1	0	0	0	0	0	0	0	0	0	0	0	0
ENSMUSG00000026589	protein_coding	Sec16b		chr1	157506728	157568425	61698	+	78	114	75	191	80	68	90	76	97	65	81	78	132	102	117	99	85
ENSMUSG00000103021	processed_pseudogene	Gm37682	pseudo_consens	chr1	157596306	157596827	522	+	0	1	1	0	0	0	0	1	1	0	0	0	0	0	3	0	0
ENSMUSG00000103501	processed_pseudogene	Gm7412	pseudo_consens	chr1	157600811	157601415	605	-	0	0	1	0	1	0	0	0	2	0	1	0	0	0	1	1	1
ENSMUSG00000102245	processed_pseudogene	Gm37713	pseudo_consens	chr1	157621272	157621469	198	+	0	0	0	0	0	0	0	0	0	1	0	0	0	0	1	0	1
ENSMUSG00000004031	protein_coding	Brinp2		chr1	158245269	158356326	111058	-	3	2	1	5	2	3	3	3	0	3	7	4	0	2	6	9	0
ENSMUSG00000026587	protein_coding	Astn1	overlapping_locus	chr1	158362273	158691781	329509	+	1	0	2	3	5	0	0	1	0	0	3	0	0	1	1	2	1
ENSMUSG00000103971	lncRNA	Gm37679	overlapping_locus	chr1	158485032	158554299	69268	-	0	0	0	0	0	0	0	0	0	0	0	0	0	0	0	0	0
ENSMUSG00000102618	TEC	Gm37848	overlapping_locus	chr1	158548864	158551966	3103	-	0	0	1	0	0	0	1	0	0	0	0	0	0	0	0	0	0
ENSMUSG00000073530	protein_coding	Pappa2	overlapping_locus	chr1	158711727	158980490	268764	-	131	175	185	227	135	142	148	119	202	228	169	211	281	144	236	164	185
ENSMUSG00000104014	lncRNA	4930562F17Rik		chr1	159134272	159166387	32116	+	0	0	1	0	0	0	0	0	0	0	0	0	0	0	0	0	0
ENSMUSG00000061992	processed_pseudogene	Gm4953	pseudo_consens	chr1	159168160	159168642	483	-	5	1	2	2	0	2	2	3	2	1	3	1	2	2	2	5	1
ENSMUSG00000040782	protein_coding	Cop1	overlapping_locus	chr1	159232320	159347640	115321	+	586	601	743	673	574	555	601	629	629	556	625	526	623	558	719	561	523
ENSMUSG00000103572	TEC	Gm37115	overlapping_locus	chr1	159235710	159238558	2849	+	0	1	0	3	0	0	0	0	0	1	0	0	4	0	0	0	1
ENSMUSG00000103186	TEC	Gm37088		chr1	159337414	159337819	406	-	0	2	0	4	1	0	0	3	0	0	3	0	2	1	0	1	0
ENSMUSG00000089536	scaRNA	Scarna3a		chr1	159340283	159340422	140	+	0	0	1	0	0	0	0	0	0	0	0	0	0	0	0	0	0
ENSMUSG00000103289	processed_pseudogene	Gm31256	pseudo_consens	chr1	159378404	159378909	506	+	0	0	0	0	0	0	0	0	0	0	1	0	0	0	0	0	0
ENSMUSG00000015829	protein_coding	Tnr	overlapping_locus	chr1	159523769	159931729	407961	+	1	5	1	3	0	1	1	5	2	1	1	2	2	0	1	0	4
ENSMUSG00000104111	lncRNA	Gm37294		chr1	160041701	160044331	2631	-	0	0	0	0	1	0	0	0	0	0	0	0	2	0	0	1	0
ENSMUSG00000090394	protein_coding	4930523C07Rik		chr1	160044382	160080208	35827	+	374	453	551	503	505	428	509	384	384	558	377	450	456	388	470	469	401
ENSMUSG00000026729	lncRNA	4930562F07Rik		chr1	160074735	160077985	3251	-	4	1	5	7	3	8	8	5	2	5	3	4	3	1	4	4	4
ENSMUSG00000026725	protein_coding	Tnn		chr1	160085029	160153580	68552	-	20	24	24	28	40	31	19	25	13	25	28	28	46	27	29	23	23
ENSMUSG00000058267	protein_coding	Mrps14		chr1	160195215	160202170	6956	+	873	775	922	796	884	868	919	900	983	859	844	744	710	976	930	924	729
ENSMUSG00000014226	protein_coding	Cacybp		chr1	160202367	160212875	10509	-	1258	1099	1604	1273	1179	1178	1219	1225	1269	1269	1194	1045	1151	1272	1152	1245	1038
ENSMUSG00000103006	TEC	4933417C20Rik		chr1	160212943	160214816	1874	+	2	5	1	9	2	1	2	5	3	4	1	9	10	8	4	5	5
ENSMUSG00000026721	protein_coding	Rabgap1l	overlapping_locus	chr1	160219174	160793211	574038	-	947	1104	1216	1198	967	853	1075	851	859	849	974	890	1080	793	1038	946	811
ENSMUSG00000104302	lncRNA	Gm36975		chr1	160264324	160443072	178749	+	0	0	0	0	0	0	0	0	0	0	0	0	0	0	0	0	1
ENSMUSG00000089204	miRNA	Mir1927		chr1	160295864	160295972	109	-	0	0	0	0	0	0	0	0	0	0	0	0	0	0	0	1	0
ENSMUSG00000103522	TEC	9430087J23Rik		chr1	160315344	160316495	1152	-	0	1	0	0	0	0	1	0	1	0	0	0	1	0	0	0	1
ENSMUSG00000103693	lncRNA	Gm37529	overlapping_locus	chr1	160321686	160327078	5393	-	0	3	0	1	0	1	0	2	0	1	2	0	2	0	1	0	0
ENSMUSG00000104026	TEC	Gm37212		chr1	160570161	160573810	3650	-	0	0	0	0	0	0	0	0	0	0	1	1	2	0	1	0	0
ENSMUSG00000104020	TEC	Gm37215		chr1	160589882	160591140	1259	-	0	1	0	0	0	0	0	0	0	0	1	0	2	0	0	0	0
ENSMUSG00000103391	TEC	Gm38302		chr1	160604115	160606190	2076	-	1	0	0	0	0	0	1	1	0	0	0	0	0	0	0	1	3
ENSMUSG00000103432	TEC	6720464F23Rik		chr1	160608955	160612450	3496	-	1	2	1	2	0	0	0	0	0	1	1	0	0	2	0	0	0
ENSMUSG00000102172	TEC	Gm37873		chr1	160648023	160650302	2280	-	0	0	0	0	0	0	0	0	0	0	0	0	0	1	0	0	0
ENSMUSG00000103200	lncRNA	Gm37328	overlapping_locus	chr1	160726042	160726681	640	-	0	0	1	0	0	3	0	0	0	1	0	2	1	0	0	0	3
ENSMUSG00000103632	TEC	Gm38329		chr1	160727734	160728160	427	-	9	7	16	9	5	6	3	5	3	3	8	4	8	5	5	6	12
ENSMUSG00000104053	TEC	Gm38126		chr1	160755687	160759689	4003	+	0	0	0	0	0	1	0	1	0	0	0	0	0	1	1	0	0
ENSMUSG00000102852	lncRNA	Gm37083		chr1	160798682	160800819	2138	+	0	0	1	3	1	0	0	0	1	1	1	1	0	1	0	0	0
ENSMUSG00000103631	lncRNA	Gm38060		chr1	160839168	160839631	464	+	0	0	0	0	0	0	0	0	0	0	0	0	0	0	0	0	0
ENSMUSG00000057499	processed_pseudogene	Gm6177	pseudo_consens	chr1	160893120	160893584	465	+	6	1	1	1	1	1	3	4	0	1	2	1	1	1	1	0	3
ENSMUSG00000040423	protein_coding	Rc3h1		chr1	160906418	160974978	68561	+	1066	1380	1526	1414	1131	1030	1143	872	1074	1131	1216	1208	1454	1026	1299	1160	1113
ENSMUSG00000103343	TEC	Gm37052		chr1	160910789	160912619	1831	+	0	1	1	0	0	0	0	0	0	0	0	0	0	0	0	0	0
ENSMUSG00000103846	TEC	Gm37809		chr1	160913472	160914402	931	+	0	0	0	0	0	0	0	0	0	0	1	1	0	0	0	0	0
ENSMUSG00000103739	TEC	Gm37653		chr1	160915324	160918901	3578	+	0	2	2	1	3	0	0	0	0	1	0	3	5	2	1	3	0
ENSMUSG00000026715	protein_coding	Serpinc1		chr1	160978585	161005863	27279	+	3	1	3	3	1	1	2	1	1	4	1	5	3	6	4	2	0
ENSMUSG00000103222	TEC	Gm37729		chr1	160985758	160986929	1172	+	0	0	2	0	0	0	0	0	0	0	2	0	0	0	0	0	0
ENSMUSG00000103680	TEC	Gm37072		chr1	161001009	161001845	837	-	0	0	0	0	0	0	0	0	1	0	0	0	0	0	0	0	0
ENSMUSG00000043467	protein_coding	Zbtb37		chr1	161002922	161034849	31928	-	253	346	313	494	264	252	349	263	311	270	263	392	396	274	360	407	286
ENSMUSG00000104016	lncRNA	Gm37362		chr1	161030582	161031456	875	+	0	4	4	2	5	1	3	1	1	0	0	4	2	3	2	3	2
ENSMUSG00000053332	lncRNA	Gas5	ncRNA_host	chr1	161034422	161038539	4118	+	4057	3517	3570	4162	3661	3620	3995	3828	4311	3799	3847	3464	3392	3646	4037	3780	3208
ENSMUSG00000026709	protein_coding	Dars2		chr1	161040601	161070658	30058	-	226	228	355	320	211	221	239	289	248	234	230	237	254	255	297	257	238
ENSMUSG00000026708	protein_coding	Cenpl		chr1	161070713	161086724	16012	+	177	156	198	204	186	163	140	156	191	122	125	130	159	180	157	123	119
ENSMUSG00000026705	protein_coding	Klhl20		chr1	161088375	161131511	43137	-	464	578	608	765	513	501	618	494	591	470	497	553	598	466	499	583	503
ENSMUSG00000044835	protein_coding	Ankrd45		chr1	161142691	161170498	27808	+	0	1	1	2	0	3	2	1	1	1	1	2	4	2	1	0	1
ENSMUSG00000049160	protein_coding	Tex50		chr1	161154558	161159314	4757	-	0	0	0	0	0	0	0	0	0	0	0	1	0	0	0	0	0
ENSMUSG00000102817	transcribed_unprocessed_pseudogene	Gm6185		chr1	161176936	161237307	60372	+	1	1	3	3	0	2	0	1	1	2	2	3	2	1	1	0	5
ENSMUSG00000026701	protein_coding	Prdx6		chr1	161240112	161251219	11108	-	3688	4205	4532	4239	3995	3732	3964	4014	4316	3974	3721	3585	3926	3739	4738	3907	3490
ENSMUSG00000026700	protein_coding	Tnfsf4		chr1	161395409	161418410	23002	+	1	3	1	1	2	1	0	1	2	2	0	0	1	0	2	0	2
ENSMUSG00000066755	protein_coding	Tnfsf18		chr1	161494655	161505290	10636	+	12	20	19	33	11	11	22	32	25	23	10	29	16	17	30	19	12
ENSMUSG00000040323	processed_pseudogene	Gm15429		chr1	161726242	161727489	1248	-	22	29	30	14	24	15	18	15	19	18	16	19	26	25	14	20	27
ENSMUSG00000102399	processed_pseudogene	Gm5049	pseudo_consens	chr1	161746056	161747645	1590	+	0	0	1	3	0	1	2	4	1	0	1	2	2	0	3	0	0
ENSMUSG00000000817	protein_coding	Fasl		chr1	161780689	161788495	7807	-	2	3	4	2	1	1	0	0	0	1	0	3	0	1	0	0	0
ENSMUSG00000103625	TEC	Gm37357		chr1	161811045	161814167	3123	-	0	0	0	2	3	2	1	1	0	0	1	0	5	3	1	2	1
ENSMUSG00000040297	protein_coding	Suco		chr1	161816114	161876682	60569	-	900	1065	1261	1304	1010	941	1109	890	964	877	1012	1010	1184	1043	1120	1025	895
ENSMUSG00000102254	processed_pseudogene	Gm7496	pseudo_consens	chr1	161821865	161823068	1204	+	1	0	0	1	0	0	2	1	0	2	0	4	2	1	2	2	3
ENSMUSG00000103158	lncRNA	Gm31925		chr1	161890458	161903173	12716	+	0	0	0	0	0	0	0	1	0	0	0	0	0	0	0	0	0
ENSMUSG00000086277	protein_coding	4930558K02Rik		chr1	161942086	161979636	37551	-	1	0	0	2	0	0	1	2	1	2	2	0	0	0	1	1	0
ENSMUSG00000026698	protein_coding	Pigc	overlapping_locus	chr1	161969186	161973435	4250	+	608	546	665	626	509	517	563	610	659	632	561	548	527	601	651	572	577
ENSMUSG00000103393	lncRNA	Gm38304	overlapping_locus	chr1	161969200	162027106	57907	+	0	0	0	1	1	1	0	0	0	0	0	0	0	0	0	1	0
ENSMUSG00000040265	protein_coding	Dnm3		chr1	161982453	162478034	495582	-	48	78	46	86	51	44	54	56	56	67	72	72	97	55	74	46	52
ENSMUSG00000090260	lncRNA	2810442N19Rik	overlapping_locus	chr1	162004969	162016494	11526	+	0	0	1	2	1	0	1	2	0	1	0	1	4	4	0	0	0
ENSMUSG00000078190	lncRNA	Dnm3os	ncRNA_host	chr1	162217623	162225550	7928	+	69	66	89	161	72	55	107	93	75	63	55	68	126	132	107	95	102
ENSMUSG00000026694	protein_coding	Eef1aknmt		chr1	162532127	162548551	16425	-	414	499	552	548	469	382	494	439	415	345	399	435	421	402	496	396	412
ENSMUSG00000026696	protein_coding	Vamp4		chr1	162570515	162599084	28570	+	689	656	844	869	652	706	735	787	917	821	843	739	824	869	981	867	726
ENSMUSG00000091743	processed_pseudogene	Gm5705		chr1	162628357	162629067	711	-	0	0	0	0	0	0	0	0	1	2	0	1	0	0	0	0	0
ENSMUSG00000026697	protein_coding	Myoc		chr1	162639155	162649693	10539	+	1927	2233	1375	2819	2235	1875	2546	2461	3027	2414	2485	2046	2699	2169	2564	2302	2194
ENSMUSG00000091060	protein_coding	Myocos		chr1	162647193	162658219	11027	-	7	9	3	12	6	1	6	3	19	6	1	5	9	8	4	6	7
ENSMUSG00000040225	protein_coding	Prrc2c	ncRNA_host	chr1	162670725	162740556	69832	-	1755	3056	3718	3336	2173	2039	2548	1949	1890	1955	2092	2627	3505	1930	2384	2509	2302
ENSMUSG00000098259	miRNA	Gm27616		chr1	162674158	162674220	63	-	3	8	4	4	6	2	7	1	2	0	1	6	1	7	7	4	3
ENSMUSG00000026692	protein_coding	Fmo4		chr1	162793188	162813972	20785	-	1	9	4	9	6	4	3	3	2	5	2	5	6	4	2	3	2
ENSMUSG00000040181	protein_coding	Fmo1		chr1	162829561	162866610	37050	-	221	337	193	583	338	261	314	241	313	309	250	282	441	341	388	319	352
ENSMUSG00000040170	protein_coding	Fmo2		chr1	162874317	162898726	24410	-	574	772	751	1291	799	593	691	553	726	671	727	539	1226	520	1123	686	679
ENSMUSG00000095576	protein_coding	Fmo6		chr1	162916551	162937515	20965	-	3	0	3	1	0	0	2	2	0	1	1	1	2	0	1	0	1
ENSMUSG00000026691	protein_coding	Fmo3		chr1	162953800	162984528	30729	-	2	3	0	12	3	3	1	5	1	4	0	0	1	0	0	0	4
ENSMUSG00000103288	lncRNA	Gm37273		chr1	162983014	163066682	83669	+	0	0	0	0	0	1	1	0	0	0	0	0	0	0	0	0	0
ENSMUSG00000071890	protein_coding	Mroh9	ncRNA_host	chr1	163024302	163085670	61369	-	0	0	0	0	0	1	1	0	1	0	0	0	0	0	0	0	0
ENSMUSG00000103102	TEC	Gm37049		chr1	163108993	163110975	1983	+	0	0	0	0	0	0	0	0	0	0	0	0	0	0	1	0	0
ENSMUSG00000026586	protein_coding	Prrx1	overlapping_locus	chr1	163245119	163313710	68592	-	1353	1790	1845	2045	1687	1382	1905	1751	1752	1745	1956	1840	2291	1899	2296	2017	2128
ENSMUSG00000092188	lncRNA	Gm20471		chr1	163280356	163287045	6690	+	0	1	0	0	0	1	0	0	0	0	0	0	2	0	0	0	0
ENSMUSG00000103195	TEC	Gm37644	overlapping_locus	chr1	163306798	163309067	2270	-	1	1	0	0	0	0	0	1	0	0	0	0	3	1	0	0	0
ENSMUSG00000040124	protein_coding	Gorab		chr1	163384908	163403669	18762	-	234	257	300	318	230	303	280	287	359	254	267	271	304	345	322	289	261
ENSMUSG00000088951	snRNA	Gm24940		chr1	163402283	163402390	108	+	0	0	0	0	0	0	0	0	0	0	0	0	0	0	0	1	0
ENSMUSG00000102117	processed_pseudogene	Rpsa-ps1	pseudo_consens	chr1	163623793	163624678	886	+	14	10	11	12	18	6	18	15	13	16	15	12	7	18	17	18	16
ENSMUSG00000040113	protein_coding	Mettl11b		chr1	163702256	163725232	22977	-	27	42	7	38	43	49	56	42	45	25	61	41	28	41	38	40	34
ENSMUSG00000089700	processed_pseudogene	Gm2343	pseudo_consens	chr1	163729569	163730610	1042	+	19	9	16	18	14	10	21	11	13	9	11	9	17	9	17	13	14
ENSMUSG00000026585	protein_coding	Kifap3		chr1	163779583	163917109	137527	+	548	640	719	699	598	563	550	639	567	596	644	653	642	623	701	662	613
ENSMUSG00000026584	protein_coding	Scyl3		chr1	163929100	163955126	26027	+	518	606	678	891	559	585	677	542	559	505	516	607	692	529	590	521	531
ENSMUSG00000041406	protein_coding	BC055324		chr1	163945993	163994796	48804	-	105	115	131	122	87	74	74	106	87	47	71	84	77	112	104	86	86
ENSMUSG00000041396	protein_coding	Mettl18		chr1	163994889	163997243	2355	+	90	87	102	83	98	83	81	79	123	86	86	77	77	103	85	94	89
ENSMUSG00000026582	protein_coding	Sele		chr1	164048234	164057677	9444	+	52	80	52	87	42	63	64	28	52	74	79	70	75	33	52	49	60
ENSMUSG00000026581	protein_coding	Sell		chr1	164061982	164084181	22200	+	7	3	9	9	3	1	6	1	1	8	5	11	15	0	2	0	1
ENSMUSG00000026580	protein_coding	Selp		chr1	164115264	164150026	34763	+	45	95	59	112	61	65	69	28	47	54	51	71	71	35	52	28	53
ENSMUSG00000090081	lncRNA	Gm16587		chr1	164143432	164146366	2935	-	0	1	0	0	0	0	1	0	0	0	0	0	0	0	0	0	0
ENSMUSG00000086593	lncRNA	Gm16548		chr1	164148591	164152217	3627	-	1	0	1	0	0	1	2	1	0	1	0	1	0	0	0	0	0
ENSMUSG00000026579	protein_coding	F5	overlapping_locus	chr1	164151838	164220277	68440	+	4	8	10	20	11	17	16	5	6	3	9	3	18	8	7	5	6
ENSMUSG00000040918	protein_coding	Slc19a2		chr1	164249046	164265385	16340	+	503	472	600	591	588	486	634	405	506	528	499	439	578	517	580	500	459
ENSMUSG00000026578	protein_coding	Ccdc181		chr1	164275585	164287847	12263	+	235	213	279	231	194	201	242	256	267	233	244	205	226	219	302	237	218
ENSMUSG00000026577	protein_coding	Blzf1		chr1	164289800	164307489	17690	-	791	926	1127	974	856	812	930	754	897	832	913	790	1091	795	955	778	758
ENSMUSG00000026575	protein_coding	Nme7		chr1	164304121	164437725	133605	+	165	194	231	194	200	178	167	224	218	167	173	191	178	189	205	154	169
ENSMUSG00000103493	TEC	Gm37411		chr1	164424713	164426994	2282	+	5	0	5	6	5	3	1	3	3	0	0	0	3	2	3	0	1
ENSMUSG00000026576	protein_coding	Atp1b1		chr1	164437109	164458355	21247	-	821	1359	1124	1511	1562	1243	1200	1386	1282	1317	1281	1197	1654	1080	839	1536	1039
ENSMUSG00000104011	lncRNA	Gm32391		chr1	164462442	164463989	1548	+	15	13	11	20	14	10	8	8	14	15	14	8	13	11	7	21	6
ENSMUSG00000103226	processed_pseudogene	Gm37732	pseudo_consens	chr1	164489060	164489375	316	+	1	0	0	0	0	1	0	0	0	0	0	0	0	0	0	0	0
ENSMUSG00000097281	lncRNA	Gm26685		chr1	164503309	164514882	11574	+	0	0	0	0	0	0	0	0	1	0	0	1	2	0	0	0	0
ENSMUSG00000102389	TEC	D630023O14Rik		chr1	164575455	164578553	3099	+	0	0	0	3	0	1	1	0	1	1	1	0	0	0	0	0	0
ENSMUSG00000102761	lncRNA	Gm37184		chr1	164681982	164712771	30790	+	0	0	0	1	0	0	1	1	0	0	0	0	0	0	1	0	1
ENSMUSG00000102163	lncRNA	Gm36945		chr1	164705419	164712541	7123	-	0	0	0	1	0	0	0	0	0	1	0	0	0	0	0	0	0
ENSMUSG00000026574	protein_coding	Dpt		chr1	164796644	164824266	27623	+	1787	2232	1532	3254	2516	1996	2984	2358	3594	2570	2356	1790	3327	3908	3044	3017	2796
ENSMUSG00000103659	lncRNA	Gm32569	overlapping_locus	chr1	164803969	164899591	95623	-	0	1	0	3	2	1	0	2	3	1	2	2	2	3	2	1	2
ENSMUSG00000104117	lncRNA	Gm20743		chr1	164863133	164936775	73643	+	2	4	4	9	2	6	5	6	4	5	4	2	4	8	7	8	3
ENSMUSG00000103320	TEC	Gm37403	overlapping_locus	chr1	164872833	164876353	3521	-	2	3	1	1	0	0	2	2	5	0	2	2	2	2	2	2	1
ENSMUSG00000026573	protein_coding	Xcl1		chr1	164931644	164935527	3884	-	3	4	1	0	2	1	2	2	7	6	5	6	7	8	4	6	2
ENSMUSG00000102408	lncRNA	4930568G15Rik		chr1	165064024	165091928	27905	-	0	0	1	0	0	0	0	0	1	0	0	0	0	0	0	0	0
ENSMUSG00000026572	protein_coding	Tbx19	overlapping_locus	chr1	165137855	165160773	22919	-	0	0	0	1	0	0	0	0	0	0	1	0	0	1	2	0	1
ENSMUSG00000089967	processed_pseudogene	Gm16550	overlapping_locus	chr1	165148824	165148949	126	-	1	1	0	0	0	0	0	0	0	0	1	0	0	1	1	0	0
ENSMUSG00000040848	protein_coding	Sft2d2		chr1	165174337	165194438	20102	-	2374	3244	3349	3330	2721	2444	2965	2456	2712	2696	2919	2702	3256	2513	3442	2769	2543
ENSMUSG00000040843	protein_coding	Tiprl	overlapping_locus	chr1	165212286	165236996	24711	-	602	628	715	681	646	635	692	669	686	667	661	682	647	627	710	683	693
ENSMUSG00000102302	lncRNA	Gm38190	overlapping_locus	chr1	165230371	165235125	4755	-	22	16	19	40	12	14	18	19	14	13	21	30	28	22	15	18	16
ENSMUSG00000040836	protein_coding	Gpr161		chr1	165295789	165326745	30957	+	322	485	512	423	427	386	483	379	348	444	472	432	508	327	390	327	358
ENSMUSG00000026571	protein_coding	Dcaf6	overlapping_locus	chr1	165328698	165460475	131778	-	978	1183	1124	1661	1201	1174	1292	1245	1237	1209	1049	1205	1391	1134	1087	1298	1109
ENSMUSG00000104427	TEC	Gm38368		chr1	165379519	165380853	1335	+	0	0	1	2	0	0	1	0	0	2	1	0	0	1	0	3	1
ENSMUSG00000102401	lncRNA	Gm37864	overlapping_locus	chr1	165451555	165454629	3075	-	0	0	0	2	2	0	0	1	2	0	1	0	0	2	1	2	3
ENSMUSG00000026568	protein_coding	Mpc2	overlapping_locus	chr1	165460637	165481214	20578	+	2571	2276	2372	2573	2738	2800	2893	2696	3296	2524	2740	2141	1926	3025	2537	2732	2350
ENSMUSG00000103763	TEC	Gm37860	overlapping_locus	chr1	165467500	165468533	1034	+	3	1	2	10	4	4	6	1	6	1	1	4	7	3	5	1	2
ENSMUSG00000026567	protein_coding	Adcy10	overlapping_locus	chr1	165485183	165576774	91592	+	2	1	0	1	2	0	3	1	0	0	0	3	1	0	2	0	1
ENSMUSG00000104474	TEC	Gm38210		chr1	165585183	165585991	809	+	0	0	1	0	0	2	0	0	0	0	0	0	1	0	1	1	0
ENSMUSG00000026566	protein_coding	Mpzl1	overlapping_locus	chr1	165592240	165634538	42299	-	618	759	718	739	754	675	788	723	684	744	693	690	774	645	791	668	636
ENSMUSG00000103098	processed_pseudogene	Gm37559	overlapping_locus	chr1	165613059	165613890	832	-	1	1	1	0	1	0	4	3	0	1	0	0	1	0	1	1	2
ENSMUSG00000104517	processed_pseudogene	Gm18407	pseudo_consens	chr1	165643899	165644688	790	-	0	0	1	3	1	1	1	1	0	2	1	3	1	0	2	0	0
ENSMUSG00000040723	protein_coding	Rcsd1		chr1	165646516	165709757	63242	-	319	431	302	528	441	376	450	441	505	401	417	455	499	408	398	535	395
ENSMUSG00000103686	lncRNA	Gm37073		chr1	165721556	165722777	1222	+	0	1	0	1	0	0	1	2	0	0	0	0	0	0	0	0	0
ENSMUSG00000103242	processed_pseudogene	Gm34767	pseudo_consens	chr1	165734600	165735661	1062	-	1	0	1	0	0	0	0	0	1	0	0	0	0	0	0	1	0
ENSMUSG00000040713	protein_coding	Creg1		chr1	165763746	165775308	11563	+	2107	2337	2770	2481	2492	2320	2814	2562	3053	2406	2375	2235	2315	2998	2672	2882	2759
ENSMUSG00000104306	lncRNA	Gm36972		chr1	165775868	165777155	1288	-	0	1	0	0	0	0	1	0	1	0	0	0	0	0	1	0	0
ENSMUSG00000089829	lncRNA	Gm16565	overlapping_locus	chr1	165781075	165789367	8293	+	4	6	2	9	4	5	2	4	7	4	1	4	10	0	8	5	2
ENSMUSG00000088618	rRNA	Gm24808		chr1	165785834	165785951	118	-	0	0	0	1	0	0	0	0	0	0	0	0	0	0	0	0	0
ENSMUSG00000005763	protein_coding	Cd247	overlapping_locus	chr1	165788681	165877277	88597	+	154	173	109	166	131	110	132	149	102	165	154	93	140	130	140	123	103
ENSMUSG00000102363	TEC	Gm32999		chr1	165844047	165844608	562	-	0	1	0	0	0	0	0	0	2	1	1	0	0	0	0	0	0
ENSMUSG00000103768	TEC	Gm37856		chr1	165845087	165846085	999	-	0	1	0	3	1	1	2	1	2	0	1	3	1	0	0	3	1
ENSMUSG00000102154	lncRNA	Gm37469		chr1	165848155	165849044	890	-	1	0	2	0	0	0	0	0	0	0	0	2	1	0	0	0	0
ENSMUSG00000026565	protein_coding	Pou2f1		chr1	165865154	166002678	137525	-	413	639	641	666	536	480	595	432	486	440	551	575	696	426	547	469	421
ENSMUSG00000099008	processed_pseudogene	Gm17976	pseudo_consens	chr1	165941618	165943526	1909	+	0	0	0	0	0	0	0	0	0	0	0	0	1	1	1	1	0
ENSMUSG00000097196	lncRNA	Gm26665		chr1	166002960	166038256	35297	+	3	0	0	1	0	0	0	0	0	1	0	0	0	0	0	0	0
ENSMUSG00000102890	processed_pseudogene	Gm7626	pseudo_consens	chr1	166043339	166043691	353	-	0	0	0	0	0	0	0	0	1	0	0	0	0	0	0	0	0
ENSMUSG00000026564	protein_coding	Dusp27		chr1	166098148	166127922	29775	-	112	210	163	226	274	214	229	186	210	194	195	208	278	117	94	195	116
ENSMUSG00000000544	protein_coding	Gpa33		chr1	166130238	166166510	36273	+	2	3	2	2	1	3	0	1	3	9	0	5	1	2	4	2	3
ENSMUSG00000040629	protein_coding	Mael		chr1	166201201	166238747	37547	-	0	0	0	0	0	0	0	0	0	0	0	0	0	0	0	1	0
ENSMUSG00000040612	protein_coding	Ildr2		chr1	166254139	166316823	62685	+	45	101	93	98	118	83	109	87	101	89	89	94	132	77	87	89	98
ENSMUSG00000091393	lncRNA	5330438I03Rik		chr1	166306741	166309585	2845	-	0	0	0	0	0	1	0	0	0	0	0	0	0	0	0	0	0
ENSMUSG00000103400	lncRNA	Gm15853		chr1	166377878	166380493	2616	-	9	9	18	12	10	8	11	8	8	8	11	8	12	5	9	15	5
ENSMUSG00000026563	protein_coding	Tada1		chr1	166379097	166393621	14525	+	200	156	216	203	176	161	204	141	193	180	166	154	162	163	206	165	156
ENSMUSG00000040596	protein_coding	Pogk		chr1	166384622	166409863	25242	-	766	1057	1175	1156	978	811	993	792	830	1048	1003	1035	1147	816	1109	1114	855
ENSMUSG00000084093	processed_pseudogene	Gm16418		chr1	166431705	166431875	171	-	0	3	3	1	2	5	4	5	1	2	1	1	0	4	2	2	1
[truncated: 33,666 more rows]

## Sheet: Filtered_Counts
gene_id	gene_type	gene_name	tag	seqnames	start	end	width	strand	a14_lpr_Rep1	a14_lpr_Rep2	a14_lpr_Rep3	a14_lpr_Rep4	a14_mrl_Rep1	a14_mrl_Rep2	a14_mrl_Rep3	a14_mrl_Rep4	a14_mrl_Rep5	a12_lpr_Rep1	a12_lpr_Rep2	a12_lpr_Rep3	a12_lpr_Rep4	a12_mrl_Rep1	a12_mrl_Rep2	a12_mrl_Rep3	a12_mrl_Rep4
ENSMUSG00000025900	protein_coding	Rp1	overlapping_locus	chr1	3999557	4409241	409685	-	32	62	40	67	74	56	63	51	69	36	59	41	65	53	27	88	48
ENSMUSG00000025902	protein_coding	Sox17		chr1	4490931	4497354	6424	-	98	167	86	166	107	124	157	120	124	133	148	171	118	127	137	118	127
ENSMUSG00000033845	protein_coding	Mrpl15		chr1	4773206	4785739	12534	-	848	663	889	851	749	792	806	846	955	827	789	655	702	815	802	783	720
ENSMUSG00000025903	protein_coding	Lypla1	overlapping_locus	chr1	4807788	4848410	40623	+	1289	1215	1526	1548	1121	1236	1484	1445	1679	1169	1193	1113	1320	1321	1399	1287	1069
ENSMUSG00000033813	protein_coding	Tcea1	overlapping_locus	chr1	4857814	4897909	40096	+	176	155	188	198	151	182	194	156	168	164	169	135	162	146	146	150	142
ENSMUSG00000002459	protein_coding	Rgs20	overlapping_locus	chr1	4909576	5070285	160710	-	100	117	198	116	100	97	84	97	116	94	112	89	136	86	140	99	103
ENSMUSG00000033793	protein_coding	Atp6v1h		chr1	5070018	5162529	92512	+	1851	1832	2364	1987	2019	1869	2034	1821	2010	1876	1938	1700	1898	1899	2009	1896	1751
ENSMUSG00000033774	protein_coding	Npbwr1		chr1	5913707	5917398	3692	-	147	169	237	206	115	139	144	212	173	90	138	97	125	123	167	147	129
ENSMUSG00000025907	protein_coding	Rb1cc1		chr1	6206197	6276648	70452	+	1511	1957	2325	2354	1566	1467	1786	1611	1790	1753	1769	1636	2071	1489	1875	1766	1511
ENSMUSG00000090031	lncRNA	4732440D04Rik		chr1	6209866	6215293	5428	-	89	92	114	186	75	106	106	110	136	97	98	126	143	149	110	111	92
ENSMUSG00000051285	protein_coding	Pcmtd1	overlapping_locus	chr1	7088920	7173628	84709	+	1240	1582	1718	1885	1456	1421	1600	1319	1481	1554	1693	1718	1872	1429	1759	1683	1529
ENSMUSG00000103509	TEC	Gm38372		chr1	7148110	7152137	4028	+	43	43	66	64	28	32	36	21	50	32	24	58	80	44	32	61	46
ENSMUSG00000061024	protein_coding	Rrs1		chr1	9545408	9547455	2048	+	472	546	733	464	505	537	609	497	488	572	426	489	545	453	562	575	537
ENSMUSG00000025911	protein_coding	Adhfe1	overlapping_locus	chr1	9547948	9580673	32726	+	81	122	90	163	135	128	110	128	120	138	115	128	151	113	140	138	110
ENSMUSG00000025912	protein_coding	Mybl1		chr1	9667415	9700209	32795	-	89	113	109	183	109	112	111	126	112	60	83	76	99	110	99	103	71
ENSMUSG00000045210	protein_coding	Vcpip1		chr1	9718622	9748382	29761	-	562	790	924	867	699	624	749	597	615	617	655	699	870	621	717	605	633
ENSMUSG00000025915	protein_coding	Sgk3		chr1	9798107	9900845	102739	+	974	990	1185	1295	849	842	965	846	1078	1034	1098	1042	1121	1026	1065	965	908
ENSMUSG00000098234	lncRNA	Snhg6	overlapping_locus	chr1	9941959	9944118	2160	-	323	206	316	317	286	286	309	274	383	237	265	224	211	281	277	306	243
ENSMUSG00000099032	protein_coding	Tcf24		chr1	9960163	9967932	7770	-	67	71	109	87	96	86	81	90	115	71	71	81	82	116	99	97	117
ENSMUSG00000025917	protein_coding	Cops5		chr1	10024601	10038168	13568	-	2383	2247	2684	2658	2487	2265	2471	2400	2793	2237	2333	1947	2187	2342	2244	2316	2110
ENSMUSG00000056763	protein_coding	Cspp1		chr1	10037987	10136768	98782	+	342	356	334	507	351	335	395	318	345	271	234	345	393	373	388	437	372
ENSMUSG00000067851	protein_coding	Arfgef1	overlapping_locus	chr1	10137571	10232670	95100	-	2069	2401	2965	2762	2421	2089	2297	2082	2365	2362	2204	2349	2550	2052	2375	2364	2236
ENSMUSG00000048960	protein_coding	Prex2		chr1	10993465	11303681	310217	+	266	456	353	485	381	392	461	341	403	424	404	398	540	357	464	420	491
ENSMUSG00000016918	protein_coding	Sulf1		chr1	12692277	12861192	168916	+	98	172	172	216	176	126	198	140	184	215	155	209	262	182	221	176	171
ENSMUSG00000025938	protein_coding	Slco5a1		chr1	12866549	12992650	126102	-	111	207	147	243	198	156	150	138	159	96	155	158	208	143	90	247	98
ENSMUSG00000005886	protein_coding	Ncoa2	overlapping_locus	chr1	13139105	13374083	234979	-	1171	1650	2058	1888	1440	1267	1490	1252	1309	1234	1433	1544	1975	1242	1703	1575	1421
ENSMUSG00000025935	protein_coding	Tram1		chr1	13564698	13589910	25213	-	2353	2354	3008	2639	2361	2044	2315	2274	2317	1960	2086	1980	2253	2292	2611	2126	2011
ENSMUSG00000025937	protein_coding	Lactb2	overlapping_locus	chr1	13623330	13660546	37217	-	236	256	407	310	275	276	284	307	389	325	300	286	363	431	334	357	329
ENSMUSG00000025932	protein_coding	Eya1	overlapping_locus	chr1	14168954	14310235	141282	-	38	80	54	114	65	69	82	85	92	58	72	78	92	65	43	85	61
ENSMUSG00000025925	protein_coding	Terf1		chr1	15805646	15844052	38407	+	258	298	248	325	235	211	234	219	250	257	248	240	248	226	241	218	210
ENSMUSG00000043716	protein_coding	Rpl7		chr1	16101295	16104662	3368	-	6660	5937	6985	6315	6380	6604	7101	6934	8747	6860	7039	5683	5885	6837	7410	6726	5814
ENSMUSG00000025921	protein_coding	Rdh10		chr1	16105774	16133734	27961	+	586	634	759	684	699	621	729	540	677	605	634	554	640	592	707	595	544
ENSMUSG00000025920	protein_coding	Stau2		chr1	16228674	16520112	291439	-	663	860	812	982	909	693	773	796	835	816	788	698	942	663	747	810	654
ENSMUSG00000025939	protein_coding	Ube2w		chr1	16540790	16619489	78700	-	530	556	592	672	552	500	569	461	659	577	550	524	564	574	667	520	535
ENSMUSG00000079658	protein_coding	Eloc		chr1	16641725	16657042	15318	-	1419	1155	1476	1483	1264	1317	1386	1354	1585	1327	1390	1153	1163	1465	1443	1304	1166
ENSMUSG00000025940	protein_coding	Tmem70		chr1	16665207	16678275	13069	+	503	478	593	545	566	611	605	589	722	617	565	472	531	582	612	606	503
ENSMUSG00000025779	protein_coding	Ly96		chr1	16688051	16709611	21561	+	57	63	73	77	58	51	49	51	45	71	63	56	52	58	62	57	39
ENSMUSG00000042686	protein_coding	Jph1		chr1	16964560	17097889	133330	-	324	482	387	574	511	543	516	582	543	394	373	379	487	375	282	559	364
ENSMUSG00000067780	protein_coding	Pi15		chr1	17601901	17630939	29039	+	53	116	89	137	140	146	153	96	96	75	78	86	128	87	118	98	169
ENSMUSG00000025776	protein_coding	Crispld1		chr1	17727045	17766344	39300	+	292	400	344	397	264	309	303	329	474	462	526	431	419	440	597	416	453
ENSMUSG00000025927	protein_coding	Tfap2b		chr1	19208914	19238576	29663	+	1517	1997	2040	2309	1654	1589	2049	1774	1703	1815	1705	2232	2232	1635	2049	1793	1732
ENSMUSG00000041859	protein_coding	Mcm3		chr1	20802968	20820312	17345	-	655	762	1216	793	652	536	610	597	578	489	502	480	609	656	686	669	606
ENSMUSG00000025931	protein_coding	Paqr8		chr1	20890606	20939650	49045	+	120	240	227	199	155	135	153	170	167	174	249	205	250	161	247	200	180
ENSMUSG00000041779	protein_coding	Tram2		chr1	20996299	21079229	82931	-	209	311	294	353	227	217	267	198	201	217	216	216	330	198	251	218	215
ENSMUSG00000025933	protein_coding	Tmem14a		chr1	21218575	21230167	11593	+	49	41	36	59	44	57	44	48	55	41	56	65	48	55	52	50	48
ENSMUSG00000025934	protein_coding	Gsta3		chr1	21240589	21265661	25073	+	465	463	366	638	652	594	651	610	761	583	460	529	514	723	542	537	694
ENSMUSG00000028033	protein_coding	Kcnq5	overlapping_locus	chr1	21398403	21961942	563540	-	57	146	87	183	155	147	187	147	158	109	122	116	140	101	63	195	103
ENSMUSG00000082935	processed_pseudogene	Gm7658	overlapping_locus	chr1	21511933	21513056	1124	-	84	65	66	59	65	67	84	71	114	79	58	68	42	63	71	79	59
ENSMUSG00000026158	protein_coding	Ogfrl1		chr1	23366424	23397772	31349	-	486	641	669	716	578	604	646	670	719	580	672	637	744	601	742	623	610
ENSMUSG00000026155	protein_coding	Smap1		chr1	23844846	23922317	77472	-	406	465	626	533	468	346	458	445	330	381	358	372	510	348	399	382	362
ENSMUSG00000026154	protein_coding	Sdhaf4		chr1	23995939	24005656	9718	-	233	208	216	245	268	269	244	273	351	257	305	208	203	322	277	301	237
ENSMUSG00000026153	protein_coding	Fam135a		chr1	24011093	24100341	89249	-	1603	1895	2760	2281	1459	1491	1748	1416	1754	1566	1628	1538	2090	1635	1793	1722	1458
ENSMUSG00000026147	protein_coding	Col9a1		chr1	24177610	24252684	75075	+	205	256	119	198	199	217	215	191	185	219	342	229	195	195	374	242	185
ENSMUSG00000073725	protein_coding	Lmbrd1		chr1	24678630	24766301	87672	+	1092	1246	1337	1580	1250	1043	1256	1251	1326	1263	1342	1195	1500	1044	1341	1204	1076
ENSMUSG00000048874	protein_coding	Phf3	overlapping_locus	chr1	30802339	30873921	71583	-	1282	1755	1828	1817	1621	1377	1680	1360	1287	1342	1454	1513	1865	1283	1636	1448	1533
ENSMUSG00000026134	protein_coding	Prim2	overlapping_locus	chr1	33453810	33669795	215986	-	281	342	498	382	331	290	332	340	343	240	243	264	280	331	353	290	290
ENSMUSG00000004768	protein_coding	Rab23		chr1	33719887	33742564	22678	+	294	366	392	369	322	308	393	316	311	299	310	333	378	321	377	338	333
ENSMUSG00000042215	protein_coding	Bag2		chr1	33745484	33757795	12312	-	196	206	221	260	261	253	239	217	248	202	211	160	177	214	225	234	167
ENSMUSG00000042197	protein_coding	Zfp451		chr1	33761545	33814595	53051	-	581	743	773	760	661	573	713	616	593	629	646	693	722	583	661	734	678
ENSMUSG00000026131	protein_coding	Dst	overlapping_locus	chr1	33908225	34308661	400437	+	14821	24650	25752	24755	17961	17578	18747	18098	18933	21677	19886	23039	26467	14425	20368	18212	18194
ENSMUSG00000096992	lncRNA	Gm26788		chr1	34165856	34178446	12591	-	214	328	320	512	260	241	350	308	245	304	279	386	475	308	233	330	287
ENSMUSG00000042111	protein_coding	Ccdc115		chr1	34436670	34439672	3003	-	563	511	536	589	578	544	581	518	590	451	478	472	507	506	599	504	413
ENSMUSG00000026127	protein_coding	Imp4		chr1	34439851	34449356	9506	+	685	759	1056	810	755	653	847	692	723	685	610	641	772	714	795	722	656
ENSMUSG00000026126	protein_coding	Ptpn18		chr1	34459762	34475733	15972	+	119	98	57	146	51	85	92	91	99	61	105	97	77	116	107	99	87
ENSMUSG00000037509	protein_coding	Arhgef4	overlapping_locus	chr1	34678188	34813309	135122	+	736	1047	1284	1118	906	820	943	819	903	806	815	963	1165	744	932	919	828
ENSMUSG00000037503	protein_coding	Fam168b		chr1	34813219	34843065	29847	-	2922	3967	3992	3719	3331	2990	3505	2973	3035	3179	3103	3173	3816	2793	3631	3228	3045
ENSMUSG00000026123	protein_coding	Plekhb2		chr1	34849976	34879580	29605	+	890	1103	1433	1087	853	920	1032	933	868	953	923	893	1092	826	993	997	852
ENSMUSG00000045216	protein_coding	Hs6st1		chr1	36068400	36106446	38047	+	784	1074	1153	1064	1004	856	1037	869	818	923	879	1021	1211	787	1041	1003	854
ENSMUSG00000037470	protein_coding	Uggt1	ncRNA_host	chr1	36140027	36244720	104694	-	1248	1595	1986	1694	1482	1241	1416	1273	1284	1253	1328	1423	1676	1311	1459	1547	1377
ENSMUSG00000047180	protein_coding	Neurl3		chr1	36264597	36274679	10083	-	136	94	141	170	118	113	149	104	128	101	134	158	154	147	191	117	135
ENSMUSG00000037447	protein_coding	Arid5a		chr1	36307733	36324029	16297	+	219	298	221	274	204	265	245	217	228	260	209	310	288	213	275	232	222
ENSMUSG00000010453	protein_coding	Kansl3	ncRNA_host	chr1	36335730	36369181	33452	-	1153	1559	1436	1773	1440	1299	1416	1260	1287	1276	1276	1410	1531	1239	1444	1377	1274
ENSMUSG00000001143	protein_coding	Lman2l		chr1	36419871	36445271	25401	-	241	266	312	343	251	262	250	270	252	222	229	270	339	291	320	358	262
ENSMUSG00000037408	protein_coding	Cnnm4	ncRNA_host	chr1	36471620	36508764	37145	+	196	261	317	307	275	222	249	239	223	192	274	252	368	216	288	266	234
ENSMUSG00000001138	protein_coding	Cnnm3		chr1	36511867	36528237	16371	+	481	692	706	715	603	503	608	549	558	545	555	596	723	516	680	595	527
ENSMUSG00000067653	protein_coding	Ankrd23		chr1	36530188	36536883	6696	-	96	133	89	142	108	117	130	128	156	114	138	115	132	103	79	125	91
ENSMUSG00000079610	protein_coding	Ankrd39	overlapping_locus	chr1	36537507	36547445	9939	-	92	102	100	112	93	92	101	95	120	100	78	105	85	124	127	113	110
ENSMUSG00000026121	protein_coding	Sema4c		chr1	36548639	36558349	9711	-	644	721	677	769	609	572	665	561	507	448	517	706	777	604	745	715	713
ENSMUSG00000087589	lncRNA	D430040D24Rik		chr1	36557701	36565613	7913	+	51	52	58	87	53	59	64	60	47	54	49	47	69	48	54	59	49
ENSMUSG00000046337	protein_coding	Fam178b		chr1	36562692	36683183	120492	-	60	65	58	72	59	50	69	61	43	47	32	66	49	51	56	52	53
ENSMUSG00000061518	protein_coding	Cox5b		chr1	36691449	36693681	2233	+	895	892	956	868	905	1023	1019	1155	1261	906	800	872	897	994	1009	1023	816
ENSMUSG00000037351	protein_coding	Actr1b		chr1	36698114	36714422	16309	-	1619	1996	2177	2096	1933	1737	1842	1735	1828	1883	1644	1728	1842	1709	1810	1921	1624
ENSMUSG00000026116	protein_coding	Tmem131	overlapping_locus	chr1	36792191	36943666	151476	-	1734	2546	3108	2904	2239	2012	2294	1923	1915	1810	1863	2144	2988	1699	2189	2135	1972
ENSMUSG00000026113	protein_coding	Inpp4a		chr1	37299865	37410736	110872	+	309	388	420	484	352	312	367	350	323	355	372	437	451	347	395	439	371
ENSMUSG00000026112	protein_coding	Coa5		chr1	37417084	37430103	13020	-	2426	3055	3230	2990	2891	2510	2768	2533	2709	2515	2724	2599	2788	2368	2930	2712	2432
ENSMUSG00000026111	protein_coding	Unc50		chr1	37430139	37439124	8986	+	1399	1198	1268	1477	1360	1292	1540	1265	1652	1392	1312	1160	1188	1383	1424	1312	1236
ENSMUSG00000026110	protein_coding	Mgat4a	overlapping_locus	chr1	37439340	37541016	101677	-	257	308	263	309	256	230	263	250	265	318	305	360	327	234	316	233	260
ENSMUSG00000026090	protein_coding	2010300C02Rik	overlapping_locus	chr1	37611677	37720085	108409	-	587	792	788	747	621	588	626	544	464	581	586	581	740	497	602	484	485
ENSMUSG00000060771	protein_coding	Tsga10		chr1	37754776	37866429	111654	-	41	61	76	74	54	65	79	60	72	61	70	60	79	89	111	95	85
ENSMUSG00000037216	protein_coding	Lipt1		chr1	37871738	37876228	4491	+	67	80	79	61	54	55	55	60	78	62	50	63	82	67	60	56	57
ENSMUSG00000026088	protein_coding	Mitd1		chr1	37874801	37890411	15611	-	422	367	411	478	303	330	399	292	427	352	313	354	353	332	293	328	318
ENSMUSG00000026087	protein_coding	Mrpl30		chr1	37890477	37898535	8059	+	1198	1068	1343	1316	1311	1279	1212	1158	1353	1216	1236	978	1014	1137	1185	1165	969
ENSMUSG00000061584	protein_coding	Lyg2		chr1	37905923	37916493	10571	-	94	135	69	16	128	92	43	23	56	114	314	86	209	38	72	31	49
ENSMUSG00000058407	protein_coding	Txndc9		chr1	37985189	37997893	12705	-	1076	1074	1337	1214	1075	994	1095	1080	1197	1105	1154	964	1013	1104	1138	1054	942
ENSMUSG00000026083	protein_coding	Eif5b		chr1	37998010	38055579	57570	+	2463	3325	3835	3190	3105	2632	2518	1926	2237	2535	2694	2661	2997	1684	2960	2769	2398
ENSMUSG00000026082	protein_coding	Rev1	overlapping_locus	chr1	38052786	38129801	77016	-	310	428	414	495	399	350	421	412	384	331	325	337	363	350	379	429	347
ENSMUSG00000037138	protein_coding	Aff3		chr1	38177326	38664955	487630	-	397	826	636	858	585	631	770	684	761	529	651	609	757	546	810	667	795
ENSMUSG00000026080	protein_coding	Chst10		chr1	38863867	38898161	34295	-	31	67	44	41	41	52	57	39	50	47	66	49	48	53	78	52	53
ENSMUSG00000026078	protein_coding	Pdcl3		chr1	38985608	38997238	11631	+	674	795	877	883	824	819	838	810	937	781	718	727	826	850	883	836	746
ENSMUSG00000026077	protein_coding	Npas2	overlapping_locus	chr1	39193731	39363236	169506	+	127	218	331	191	228	205	226	199	128	178	138	199	212	134	198	137	145
ENSMUSG00000073702	protein_coding	Rpl31		chr1	39367842	39371911	4070	+	81	62	112	91	87	91	85	101	125	98	109	71	65	111	103	104	83
ENSMUSG00000003134	protein_coding	Tbc1d8		chr1	39371492	39478755	107264	-	602	789	746	998	814	706	785	663	762	673	645	772	795	652	687	711	624
ENSMUSG00000003135	protein_coding	Cnot11		chr1	39534992	39546889	11898	+	617	783	788	728	795	728	700	618	658	630	636	624	700	604	728	621	641
ENSMUSG00000048234	protein_coding	Rnf149	overlapping_locus	chr1	39551296	39577405	26110	-	886	909	1072	957	943	921	999	944	950	928	929	807	976	840	956	817	766
ENSMUSG00000026074	protein_coding	Map4k4		chr1	39900913	40026310	125398	+	2648	3628	3854	3653	3081	2857	3372	2781	2736	3066	3104	3179	3982	2638	3667	3098	2877
ENSMUSG00000026073	protein_coding	Il1r2		chr1	40074079	40125231	51153	+	1387	1554	1365	1802	1456	1473	1681	1576	1680	1765	1804	1490	1978	1448	1341	1273	1329
ENSMUSG00000026072	protein_coding	Il1r1		chr1	40225080	40317257	92178	+	869	1053	1252	1302	886	749	1019	771	879	832	882	970	1213	954	948	851	876
ENSMUSG00000070942	protein_coding	Il1rl2		chr1	40324610	40367562	42953	+	1634	1869	2655	2173	1518	1474	1750	1377	1516	1723	1550	1660	2039	1457	1591	1553	1470
ENSMUSG00000026069	protein_coding	Il1rl1		chr1	40429570	40465415	35846	+	34	41	70	137	41	38	80	62	68	50	57	79	114	59	55	40	55
ENSMUSG00000026070	protein_coding	Il18r1		chr1	40465552	40500854	35303	+	94	94	70	133	62	73	87	68	93	103	113	106	139	77	92	91	88
ENSMUSG00000026062	protein_coding	Slc9a2		chr1	40680574	40769273	88700	+	83	133	60	128	113	120	93	99	96	104	111	120	108	92	84	138	71
ENSMUSG00000041945	protein_coding	Mfsd9		chr1	40772038	40790687	18650	-	54	67	72	59	67	60	74	44	66	72	56	66	70	48	52	76	68
ENSMUSG00000079588	protein_coding	Tmem182		chr1	40805601	40856887	51287	+	545	988	724	1092	1093	872	884	984	1039	999	929	939	1155	689	516	1067	706
ENSMUSG00000045515	protein_coding	Pou3f3	overlapping_locus	chr1	42694925	42703176	8252	+	53	91	78	82	63	80	85	78	88	87	109	84	130	86	121	120	86
ENSMUSG00000060679	protein_coding	Mrps9		chr1	42851233	42905683	54451	+	906	844	939	1055	880	899	929	890	1039	842	858	719	832	810	876	808	699
ENSMUSG00000070939	protein_coding	Tgfbrap1		chr1	43047200	43098637	51438	-	987	1391	1492	1443	1276	1078	1255	1086	989	1098	1087	1100	1369	925	1186	1127	1070
ENSMUSG00000010290	protein_coding	AI597479		chr1	43098710	43115947	17238	+	556	674	646	626	563	583	652	612	655	545	521	487	544	557	611	578	509
ENSMUSG00000008136	protein_coding	Fhl2		chr1	43123074	43196984	73911	-	77	76	74	67	71	71	70	51	54	60	82	60	85	65	55	78	50
ENSMUSG00000066877	protein_coding	Nck2	overlapping_locus	chr1	43444579	43570515	125937	+	252	339	346	323	284	301	300	278	347	290	305	305	332	270	367	307	278
ENSMUSG00000026051	protein_coding	Ecrg4		chr1	43730602	43742578	11977	+	538	538	537	591	479	508	549	576	732	893	907	736	536	704	859	763	661
ENSMUSG00000057363	protein_coding	Uxs1		chr1	43746966	43827800	80835	-	466	507	627	518	527	487	513	507	493	447	489	427	435	432	531	475	464
ENSMUSG00000041763	protein_coding	Tpp2		chr1	43933647	44003000	69354	+	892	1079	1289	1300	1115	925	1051	819	887	850	899	943	1132	871	987	896	920
ENSMUSG00000026049	protein_coding	Tex30	overlapping_locus	chr1	44086613	44102441	15829	-	215	129	156	179	143	148	160	117	190	118	130	98	109	147	134	102	106
ENSMUSG00000026047	protein_coding	Poglut2	overlapping_locus	chr1	44106546	44118808	12263	-	202	237	253	301	182	165	181	190	203	189	196	194	211	251	228	236	216
ENSMUSG00000041684	protein_coding	Bivm		chr1	44118957	44144770	25814	+	411	367	429	468	338	336	348	376	484	373	391	346	360	390	436	388	371
ENSMUSG00000026048	protein_coding	Ercc5		chr1	44147744	44181260	33517	+	661	813	782	944	902	703	831	656	733	691	705	793	841	698	746	695	700
ENSMUSG00000046828	protein_coding	Mettl21e		chr1	44204070	44218961	14892	-	63	63	44	134	96	95	79	54	99	75	131	69	93	102	34	133	52
ENSMUSG00000056870	protein_coding	Gulp1	overlapping_locus	chr1	44551511	44796838	245328	+	185	192	182	286	210	196	303	272	359	255	243	237	322	300	360	272	216
ENSMUSG00000026043	protein_coding	Col3a1	ncRNA_host	chr1	45311538	45349706	38169	+	11412	15996	12953	18068	13601	8339	11287	12219	12088	8782	12512	9194	19422	17993	27060	13466	15606
ENSMUSG00000026042	protein_coding	Col5a2	overlapping_locus	chr1	45374321	45503282	128962	-	1169	1715	1696	2047	1345	1010	1444	1205	1241	1211	1480	1462	2375	1629	2304	1612	1851
ENSMUSG00000025995	protein_coding	Wdr75		chr1	45795166	45823619	28454	+	767	830	1112	956	922	826	851	777	746	728	671	675	832	806	781	840	717
ENSMUSG00000025993	protein_coding	Slc40a1		chr1	45908068	45926523	18456	-	1246	1140	1400	1299	976	757	892	869	1308	983	1330	843	1314	878	1443	937	822
ENSMUSG00000025986	protein_coding	Slc39a10	overlapping_locus	chr1	46807544	46892852	85309	-	609	854	1145	777	725	649	671	675	683	780	806	829	864	666	853	801	914
ENSMUSG00000026109	protein_coding	Tmeff2	overlapping_locus	chr1	50900647	51187270	286624	+	31	53	25	63	52	25	50	43	51	53	30	34	76	43	64	67	45
ENSMUSG00000045954	protein_coding	Cavin2		chr1	51289126	51302960	13835	+	733	876	753	1033	865	802	979	842	917	933	759	745	1046	874	1003	966	965
ENSMUSG00000026107	protein_coding	Nabp1		chr1	51465862	51478425	12564	-	551	487	920	579	339	352	408	354	639	477	455	458	577	632	599	627	591
ENSMUSG00000018417	protein_coding	Myo1b	overlapping_locus	chr1	51749765	51916071	166307	-	527	696	720	671	618	439	595	497	466	519	670	591	794	492	699	543	592
ENSMUSG00000072324	processed_pseudogene	Gm8420	pseudo_consens	chr1	51940664	51941261	598	-	469	379	450	421	443	457	443	381	513	420	441	392	357	397	475	401	410
ENSMUSG00000026104	protein_coding	Stat1	overlapping_locus	chr1	52119440	52161865	42426	+	441	755	657	592	232	265	290	273	299	432	629	535	460	338	342	320	336
ENSMUSG00000026103	protein_coding	Gls		chr1	52163448	52233232	69785	-	1572	1748	2176	2277	1666	1682	1822	1705	1854	1936	1868	1782	2129	1746	1826	1815	1716
ENSMUSG00000002881	protein_coding	Nab1		chr1	52457294	52500679	43386	-	2105	2358	2942	2826	2202	2147	2519	2191	2231	2261	2167	2077	2395	1937	2159	2257	1889
ENSMUSG00000043015	protein_coding	Nemp2		chr1	52630703	52651919	21217	+	236	256	316	291	237	191	268	259	270	196	239	246	247	323	290	297	248
ENSMUSG00000041439	protein_coding	Mfsd6	overlapping_locus	chr1	52656286	52727462	71177	-	1808	2203	2904	2413	2027	1731	2106	1718	1860	1940	2038	1883	2455	1577	2382	1919	1843
ENSMUSG00000026102	protein_coding	Inpp1		chr1	52785427	52817688	32262	-	215	284	189	308	211	217	259	205	221	210	227	230	249	222	224	229	227
ENSMUSG00000041426	protein_coding	Hibch		chr1	52844929	52920986	76058	+	582	541	644	583	615	566	601	573	757	570	544	534	508	678	637	623	554
ENSMUSG00000043629	protein_coding	1700019D03Rik		chr1	52922324	53020179	97856	-	39	48	45	83	35	43	47	42	57	41	58	46	56	61	43	50	58
ENSMUSG00000026100	protein_coding	Mstn		chr1	53061640	53068079	6440	+	121	107	93	192	147	168	160	221	223	179	145	144	165	170	82	203	112
ENSMUSG00000026098	protein_coding	Pms1		chr1	53189187	53297018	107832	-	103	116	145	103	108	85	104	111	122	126	96	101	121	103	113	95	90
ENSMUSG00000026097	protein_coding	Ormdl1	overlapping_locus	chr1	53297095	53310309	13215	+	313	237	247	322	258	248	299	227	333	285	304	234	249	285	308	262	236
ENSMUSG00000026096	protein_coding	Osgepl1	overlapping_locus	chr1	53313624	53326343	12720	+	186	209	188	293	192	208	200	183	223	208	218	190	179	211	210	195	182
ENSMUSG00000026095	protein_coding	Asnsd1	overlapping_locus	chr1	53344617	53352752	8136	-	246	262	253	244	251	260	223	260	250	233	282	246	195	225	256	254	197
ENSMUSG00000026094	protein_coding	Stk17b		chr1	53755506	53785224	29719	-	784	890	1069	984	776	735	903	693	854	969	872	818	1052	955	988	835	795
ENSMUSG00000042807	protein_coding	Hecw2	overlapping_locus	chr1	53806876	54195168	388293	-	79	119	84	120	94	88	113	104	121	86	116	111	131	99	119	102	126
ENSMUSG00000041303	protein_coding	Gtf3c3		chr1	54396004	54438971	42968	-	357	357	519	418	320	296	346	333	379	317	411	380	381	365	394	374	389
ENSMUSG00000073678	protein_coding	Pgap1	overlapping_locus	chr1	54472994	54557684	84691	-	779	972	1203	1035	701	765	818	813	814	844	853	875	1127	777	986	850	886
ENSMUSG00000052331	protein_coding	Ankrd44	overlapping_locus	chr1	54645340	54926387	281048	-	368	497	518	637	479	383	478	395	429	452	493	587	609	404	588	496	460
ENSMUSG00000025982	protein_coding	Sf3b1		chr1	54985169	55027481	42313	-	5335	6052	6410	7775	5823	5277	6602	5191	5504	5271	5037	5826	6411	6220	5593	6193	5573
ENSMUSG00000025981	protein_coding	Coq10b	overlapping_locus	chr1	55052770	55072702	19933	+	322	319	398	469	364	378	419	316	354	482	433	372	454	382	449	430	379
ENSMUSG00000025980	protein_coding	Hspd1		chr1	55077835	55088243	10409	-	913	1181	1590	1052	1198	1109	1114	1125	952	1040	1000	1024	1160	1043	1118	1116	1091
ENSMUSG00000073676	protein_coding	Hspe1		chr1	55088132	55091307	3176	+	251	208	261	216	234	247	270	253	297	261	234	207	201	268	294	227	186
ENSMUSG00000025979	protein_coding	Mob4		chr1	55131231	55154899	23669	+	1639	1489	1834	1787	1550	1538	1841	1523	2038	1581	1832	1437	1649	1659	1856	1583	1397
ENSMUSG00000025978	protein_coding	Rftn2		chr1	55170159	55226782	56624	-	349	473	338	389	423	416	465	402	415	527	599	469	510	421	533	481	560
ENSMUSG00000046994	protein_coding	Mars2		chr1	55237177	55248470	11294	+	193	182	249	250	166	188	186	184	221	189	186	204	225	223	224	188	175
ENSMUSG00000038349	protein_coding	Plcl1	overlapping_locus	chr1	55405921	55754285	348365	+	65	79	65	100	80	89	84	74	82	55	80	102	84	67	67	82	65
ENSMUSG00000038323	protein_coding	1700066M21Rik		chr1	57377620	57385423	7804	+	135	128	146	170	140	127	136	136	169	116	132	115	121	122	137	128	128
ENSMUSG00000048495	protein_coding	Tyw5		chr1	57388237	57407101	18865	-	135	137	137	187	106	145	159	143	201	116	138	117	129	169	137	121	116
ENSMUSG00000025971	protein_coding	Maip1		chr1	57406328	57417953	11626	+	330	284	312	363	404	374	385	387	360	294	318	265	292	341	336	312	266
ENSMUSG00000038305	protein_coding	Spats2l		chr1	57774162	57948394	174233	+	221	334	311	317	204	73	321	153	249	289	292	296	272	202	81	205	266
ENSMUSG00000054770	protein_coding	Kctd18		chr1	57955101	58018956	63856	-	312	433	409	569	408	376	445	393	380	333	334	401	490	391	447	429	350
ENSMUSG00000026039	protein_coding	Sgo2a		chr1	57995971	58025899	29929	+	69	65	83	94	65	51	54	40	57	36	42	45	66	61	78	39	39
ENSMUSG00000063558	protein_coding	Aox1		chr1	58029931	58106413	76483	+	300	450	306	816	370	342	498	392	391	409	301	433	569	444	391	424	409
ENSMUSG00000064294	protein_coding	Aox3		chr1	58113130	58200698	87569	+	233	230	221	227	281	201	277	211	242	181	195	175	156	191	154	177	218
ENSMUSG00000038242	protein_coding	Aox4		chr1	58210397	58268597	58201	+	8035	9077	9476	6882	8826	6851	8889	6857	8183	5546	6557	6395	6292	8714	7905	8568	8580
ENSMUSG00000079554	protein_coding	Aox2		chr1	58278326	58380259	101934	+	62	69	72	87	84	67	87	70	67	71	67	50	64	74	71	81	100
ENSMUSG00000051223	protein_coding	Bzw1		chr1	58392898	58407353	14456	+	5411	5107	6334	5812	5576	5195	5739	4940	5368	5218	4980	4386	4956	4881	5007	4885	4574
ENSMUSG00000026034	protein_coding	Clk1		chr1	58410189	58424066	13878	-	2806	2856	2626	5116	2433	2563	3275	2478	3601	2503	2785	3336	3530	3379	2912	2979	2625
ENSMUSG00000026035	protein_coding	Ppil3		chr1	58430994	58445486	14493	-	331	322	373	323	298	267	284	318	332	341	364	307	304	342	383	346	286
ENSMUSG00000026036	protein_coding	Nif3l1		chr1	58445151	58481816	36666	+	485	472	630	494	486	449	522	480	446	423	488	406	470	439	492	478	397
ENSMUSG00000026037	protein_coding	Orc2	ncRNA_host	chr1	58462771	58505109	42339	-	499	568	699	661	619	547	587	527	572	535	501	439	551	538	484	492	459
ENSMUSG00000038174	protein_coding	Fam126b		chr1	58522806	58586323	63518	-	509	641	651	745	620	594	732	575	675	496	517	574	659	522	665	583	559
ENSMUSG00000026032	protein_coding	Ndufb3		chr1	58586384	58595964	9581	+	816	707	797	846	842	820	865	775	1018	849	918	783	649	926	864	953	732
ENSMUSG00000102059	transcribed_unprocessed_pseudogene	Gm20257		chr1	58652641	58655831	3191	+	75	77	61	130	51	73	62	67	75	73	95	63	81	76	70	69	53
ENSMUSG00000026031	protein_coding	Cflar		chr1	58711508	58758884	47377	+	945	1330	1228	1428	955	977	1160	970	1162	1081	1226	1206	1436	1020	1315	1130	1007
ENSMUSG00000026029	protein_coding	Casp8	overlapping_locus	chr1	58795374	58847503	52130	+	329	439	586	543	385	326	392	354	363	417	416	399	487	422	472	447	391
ENSMUSG00000026028	protein_coding	Trak2		chr1	58900449	58973430	72982	-	1192	1420	1418	1669	1337	1227	1388	1032	1292	1163	1239	1240	1528	1152	1332	1356	1059
ENSMUSG00000026027	protein_coding	Stradb		chr1	58973522	58995715	22194	+	310	414	429	517	403	429	373	389	375	352	405	384	433	395	334	373	357
ENSMUSG00000038079	protein_coding	Tmem237		chr1	59100590	59120408	19819	-	183	192	241	226	185	178	216	195	177	152	217	185	236	234	219	189	182
ENSMUSG00000097573	lncRNA	G730003C15Rik		chr1	59119833	59122141	2309	+	46	58	54	60	77	44	51	57	59	64	49	38	53	39	55	43	48
ENSMUSG00000026024	protein_coding	Als2	overlapping_locus	chr1	59162926	59237231	74306	-	488	527	555	726	450	383	429	402	476	385	378	526	516	471	491	483	452
ENSMUSG00000041075	protein_coding	Fzd7		chr1	59482424	59486955	4532	+	1365	1865	1926	1650	1561	1540	1835	1651	1404	1574	1627	1747	1801	1587	1886	1705	1552
ENSMUSG00000097819	lncRNA	Gm26813		chr1	59488480	59492605	4126	-	112	132	116	148	143	154	151	136	106	137	142	112	151	95	130	104	95
ENSMUSG00000047361	protein_coding	Gm973	ncRNA_host	chr1	59516264	59636417	120154	+	351	373	308	459	364	356	332	336	306	474	368	467	389	276	474	302	306
ENSMUSG00000026021	protein_coding	Sumo1	overlapping_locus	chr1	59586558	59670834	84277	-	730	558	602	645	595	597	640	611	841	646	668	540	493	690	689	667	607
ENSMUSG00000026020	protein_coding	Nop58	ncRNA_host	chr1	59684971	59719044	34074	+	1687	1800	2881	1945	1959	1764	2011	1705	1494	1675	1509	1528	1736	1657	1785	1759	1620
ENSMUSG00000067336	protein_coding	Bmpr2	overlapping_locus	chr1	59763400	59879014	115615	+	2557	3922	4360	4215	3322	3153	3724	3188	3060	3315	3332	3651	4632	2507	3491	3197	3046
ENSMUSG00000041040	protein_coding	Fam117b	overlapping_locus	chr1	59913006	59985346	72341	+	865	1161	1246	1197	1136	970	1123	830	797	924	971	904	1136	774	1084	851	843
ENSMUSG00000026019	protein_coding	Wdr12		chr1	60069785	60098645	28861	-	402	430	638	437	392	374	397	409	372	352	326	360	353	380	354	384	345
ENSMUSG00000026017	protein_coding	Carf	overlapping_locus	chr1	60098247	60153953	55707	+	219	233	260	334	242	218	271	231	262	199	227	268	256	260	286	201	219
ENSMUSG00000073664	protein_coding	Nbeal1		chr1	60180599	60338328	157730	+	627	962	911	1092	683	747	888	751	827	862	875	1020	1115	706	910	902	779
ENSMUSG00000049439	protein_coding	Cyp20a1	overlapping_locus	chr1	60343323	60388060	44738	+	273	305	315	335	291	277	350	274	350	288	294	274	306	316	337	327	323
ENSMUSG00000026782	protein_coding	Abi2		chr1	60409619	60481158	71540	+	461	582	569	691	666	487	574	479	526	471	514	453	653	480	548	486	453
ENSMUSG00000026014	protein_coding	Raph1	overlapping_locus	chr1	60482292	60567104	84813	-	965	1468	1839	1698	1158	960	1193	1103	1148	1295	1408	1487	1876	1007	1315	1360	1144
ENSMUSG00000026012	protein_coding	Cd28		chr1	60716800	60773359	56560	+	72	98	166	177	65	83	95	101	109	193	251	171	144	108	133	155	111
ENSMUSG00000081382	processed_pseudogene	Rpl18-ps1	overlapping_locus	chr1	60900898	60901422	525	+	54	49	52	59	55	45	63	52	47	42	57	35	51	47	37	40	30
ENSMUSG00000052062	protein_coding	Pard3b	overlapping_locus	chr1	61638824	62642284	1003461	+	224	374	304	375	366	339	404	318	297	316	290	303	349	273	381	308	296
ENSMUSG00000025969	protein_coding	Nrp2	overlapping_locus	chr1	62703285	62818695	115411	+	1089	1696	1674	1386	1603	1174	1431	1226	1146	1362	1343	1417	1853	1205	1600	1533	1676
ENSMUSG00000100426	lncRNA	Gm4208		chr1	62821355	62832370	11016	-	66	42	41	57	72	62	61	47	96	59	49	70	48	98	110	88	85
ENSMUSG00000040865	protein_coding	Ino80d		chr1	62958418	63114667	156250	-	797	1238	1282	1324	940	819	1094	819	877	879	944	1102	1207	850	1039	1092	991
ENSMUSG00000084799	lncRNA	Ino80dos	overlapping_locus	chr1	63113078	63158290	45213	+	39	54	41	83	56	53	51	41	50	43	45	53	72	57	41	48	50
ENSMUSG00000101599	lncRNA	Gm20342	overlapping_locus	chr1	63117118	63126837	9720	+	102	113	84	152	59	74	77	86	100	70	83	101	119	89	98	95	82
ENSMUSG00000025968	protein_coding	Ndufs1		chr1	63143596	63176833	33238	-	1482	1975	2245	2293	2214	1991	2117	2095	1959	1968	1915	1925	2277	1907	1950	2259	1954
ENSMUSG00000025967	protein_coding	Eef1b2	ncRNA_host	chr1	63176825	63180486	3662	+	12198	9730	10825	10314	10867	11562	12039	10779	14847	11378	11192	8875	8979	10996	12697	11074	9688
ENSMUSG00000025964	protein_coding	Adam23		chr1	63445891	63596276	150386	+	169	312	223	329	228	214	319	207	208	203	243	339	338	228	316	231	259
ENSMUSG00000025962	protein_coding	Fastkd2		chr1	63730614	63754655	24042	+	312	330	498	414	340	370	420	389	466	355	311	304	316	377	335	377	295
ENSMUSG00000025959	protein_coding	Klf7	ncRNA_host	chr1	64029447	64122282	92836	-	194	247	302	276	206	162	224	179	198	249	249	280	316	183	248	316	275
ENSMUSG00000025958	protein_coding	Creb1		chr1	64532645	64604548	71904	+	932	1171	1355	1361	1075	995	1134	1042	1031	1040	1067	1103	1172	1104	1286	1148	1034
ENSMUSG00000025956	protein_coding	Mettl21a		chr1	64606473	64617242	10770	-	360	293	325	343	263	305	295	312	350	301	384	333	315	341	352	281	289
ENSMUSG00000070871	protein_coding	Ccnyl1		chr1	64690455	64725644	35190	+	175	177	201	208	173	164	164	162	127	146	165	160	204	185	161	157	166
ENSMUSG00000045005	protein_coding	Fzd5		chr1	64730558	64737751	7194	-	287	386	319	338	349	291	329	291	250	289	349	379	409	237	301	304	253
ENSMUSG00000051344	protein_coding	Plekhm3		chr1	64785983	64956824	170842	-	275	385	444	462	295	283	356	273	309	346	381	363	460	322	456	381	353
ENSMUSG00000084416	processed_pseudogene	Rpl10a-ps1		chr1	64993951	64994604	654	-	221	153	165	211	129	172	181	164	219	133	134	102	123	155	159	179	116
ENSMUSG00000025950	protein_coding	Idh1		chr1	65158616	65186500	27885	-	2623	3163	2946	3376	3581	3059	3349	3285	3021	3077	3338	2823	3038	3151	3104	3012	3056
ENSMUSG00000025949	protein_coding	Pikfyve		chr1	65186683	65278695	92013	+	659	855	896	929	662	667	743	658	703	633	657	754	870	647	723	753	663
ENSMUSG00000015222	protein_coding	Map2	ncRNA_host	chr1	66175273	66442583	267311	+	1769	1691	3025	2150	1503	1395	1676	1308	2169	1475	1924	1529	2246	1628	2728	1787	1639
ENSMUSG00000026005	protein_coding	Rpe		chr1	66700831	66719805	18975	+	593	577	895	629	573	602	654	625	799	562	513	569	617	679	675	655	609
ENSMUSG00000026004	protein_coding	Kansl1l	overlapping_locus	chr1	66719248	66817562	98315	-	351	414	473	481	372	334	395	420	441	438	443	470	477	402	403	466	380
ENSMUSG00000026003	protein_coding	Acadl	overlapping_locus	chr1	66830839	66863277	32439	-	1059	1453	1651	1464	1369	1330	1454	1586	1454	1866	1516	1657	1728	1450	1463	1636	1393
ENSMUSG00000061816	protein_coding	Myl1		chr1	66924295	66945404	21110	-	1742	2339	1795	2993	2843	2858	2471	3268	3425	2854	2764	2382	2556	2694	1567	3328	2076
ENSMUSG00000026000	protein_coding	Lancl1		chr1	67000517	67038872	38356	-	2447	2538	2929	2809	2150	2121	2142	2239	2598	2076	1945	2097	2223	2218	2559	2088	1956
ENSMUSG00000025997	protein_coding	Ikzf2	overlapping_locus	chr1	69531214	69687245	156032	-	452	529	662	726	416	405	536	437	561	470	468	576	652	519	553	589	514
ENSMUSG00000026196	protein_coding	Bard1	overlapping_locus	chr1	71027498	71103146	75649	-	79	121	134	113	99	79	66	85	85	44	50	62	66	95	84	71	70
ENSMUSG00000050296	protein_coding	Abca12		chr1	71242276	71414910	172635	-	2721	2965	4848	3636	2259	1915	2561	1762	2491	2396	3095	2493	4495	2114	3522	2783	2345
ENSMUSG00000026192	protein_coding	Atic		chr1	71557150	71579631	22482	+	717	976	1478	935	1005	919	960	883	785	830	843	819	843	917	1021	1014	890
ENSMUSG00000026193	protein_coding	Fn1		chr1	71585520	71653200	67681	-	1834	3653	3806	4012	2579	1966	3178	2333	2681	2442	2667	2539	4899	2909	4064	2890	3724
ENSMUSG00000039395	protein_coding	Mreg		chr1	72159442	72212307	52866	-	1436	1718	1839	1776	1579	1397	1666	1490	1619	1422	1377	1226	1631	1231	1582	1362	1151
ENSMUSG00000026189	protein_coding	Pecr		chr1	72259167	72284314	25148	-	323	366	423	373	354	348	323	370	326	317	280	288	304	347	346	369	302
ENSMUSG00000026187	protein_coding	Xrcc5		chr1	72307427	72394952	87526	+	508	666	849	694	655	577	639	616	627	567	541	512	647	584	609	632	540
ENSMUSG00000039354	protein_coding	Smarcal1		chr1	72583251	72633134	49884	+	410	501	517	553	411	416	470	426	479	453	388	464	529	464	460	485	427
ENSMUSG00000046330	protein_coding	Rpl37a		chr1	72711290	72713813	2524	+	1114	955	1015	900	1063	1055	1262	867	1267	1194	1174	906	820	1192	1292	1107	987
ENSMUSG00000039323	protein_coding	Igfbp2		chr1	72824503	72852474	27972	+	1618	1540	1979	1102	1179	1080	1206	1180	1505	1141	1207	894	1154	1789	2110	1321	1481
ENSMUSG00000026185	protein_coding	Igfbp5		chr1	72857932	72874884	16953	-	6010	8857	7493	11938	8767	7616	8932	7179	9096	5859	6164	6445	9380	7433	10440	9320	6730
ENSMUSG00000055322	protein_coding	Tns1		chr1	73910231	74124449	214219	-	4062	7497	6127	7549	5960	5721	6735	5437	5295	5546	5446	6209	7991	4624	6441	6340	5681
ENSMUSG00000061815	protein_coding	Rufy4		chr1	74125541	74148223	22683	+	54	74	56	80	54	53	63	71	46	54	59	72	64	58	58	75	65
ENSMUSG00000026180	protein_coding	Cxcr2		chr1	74153989	74161246	7258	+	158	88	226	91	88	66	92	46	89	64	79	82	138	83	131	91	88
ENSMUSG00000006304	protein_coding	Arpc2		chr1	74236084	74268209	32126	+	4599	5544	7144	5649	5017	4795	5418	5263	4797	5141	5038	4922	5759	4768	5497	5203	4548
ENSMUSG00000006299	protein_coding	Aamp		chr1	74279840	74284738	4899	-	2482	2816	3331	2778	2589	2501	2765	2661	2632	2575	2419	2473	2869	2492	3008	2815	2389
ENSMUSG00000026179	protein_coding	Pnkd	overlapping_locus	chr1	74284930	74353694	68765	+	832	1073	1166	1010	827	799	938	867	984	969	884	1099	1228	1001	1381	1076	906
ENSMUSG00000006301	protein_coding	Tmbim1		chr1	74288247	74305622	17376	-	2567	3011	3684	3317	2686	2751	3058	2867	3196	3448	3303	3288	3673	3106	3656	3418	2942
ENSMUSG00000026177	protein_coding	Slc11a1		chr1	74375195	74386062	10868	+	31	60	50	92	21	35	41	54	36	49	48	53	91	56	48	43	44
ENSMUSG00000026176	protein_coding	Ctdsp1	ncRNA_host	chr1	74391509	74397285	5777	+	975	1298	1298	1243	1156	1105	1243	1238	1170	1205	1199	1203	1329	1082	1358	1240	1165
ENSMUSG00000033364	protein_coding	Usp37	overlapping_locus	chr1	74435511	74544284	108774	-	333	450	537	475	390	347	370	314	327	386	361	333	408	407	412	415	379
ENSMUSG00000026174	protein_coding	Cnot9		chr1	74506058	74530842	24785	+	993	1229	1352	1214	1166	980	1114	994	1001	1003	1002	922	1077	942	1142	951	932
ENSMUSG00000026135	protein_coding	Zfp142	ncRNA_host	chr1	74565127	74588246	23120	-	176	319	301	311	220	198	215	217	190	238	197	246	361	212	254	194	219
ENSMUSG00000026172	protein_coding	Bcs1l		chr1	74588289	74592443	4155	+	165	169	229	201	178	164	184	211	217	188	188	206	174	255	237	226	223
ENSMUSG00000026171	protein_coding	Rnf25		chr1	74593748	74601397	7650	-	485	544	652	688	546	543	614	584	641	579	539	585	647	578	618	571	549
ENSMUSG00000033257	protein_coding	Ttll4		chr1	74661745	74703730	41986	+	799	875	787	1164	723	705	855	686	808	643	586	779	879	798	717	857	679
ENSMUSG00000026170	protein_coding	Cyp27a1		chr1	74713574	74737892	24319	+	195	202	175	357	184	195	256	204	276	238	228	259	345	271	260	301	223
ENSMUSG00000006542	protein_coding	Prkag3		chr1	74738922	74749221	10300	-	44	59	62	95	78	50	53	57	91	45	42	44	59	60	40	65	39
ENSMUSG00000033227	protein_coding	Wnt6		chr1	74771892	74785322	13431	+	101	132	108	124	157	140	148	159	108	149	116	133	147	158	201	137	170
ENSMUSG00000026167	protein_coding	Wnt10a		chr1	74791516	74804179	12664	+	829	949	1258	843	926	933	934	776	700	1012	790	991	1028	855	952	997	820
ENSMUSG00000026162	protein_coding	Nhej1	fragmented_locus	chr1	74967139	75125200	158062	-	64	63	85	67	79	76	78	57	84	66	81	64	47	74	76	63	69
ENSMUSG00000026205	protein_coding	Slc23a3		chr1	75125541	75133890	8350	-	121	100	110	148	97	103	91	73	71	79	77	92	109	78	104	87	71
ENSMUSG00000033159	protein_coding	Cnppd1		chr1	75134554	75142711	8158	-	1524	1859	2126	2033	1651	1384	1646	1703	1585	1684	1563	1565	1962	1463	1751	1401	1425
ENSMUSG00000049339	protein_coding	Retreg2		chr1	75142778	75147913	5136	+	2076	2412	2521	2384	2348	2191	2298	2214	2233	2091	2189	2135	2364	1932	2483	2109	1884
ENSMUSG00000026197	protein_coding	Zfand2b		chr1	75168646	75171629	2984	+	739	668	774	828	713	815	838	791	872	728	789	670	770	740	781	754	672
ENSMUSG00000033124	protein_coding	Atg9a	overlapping_locus	chr1	75180860	75192196	11337	-	413	640	677	661	482	450	530	444	468	428	383	484	651	358	449	516	423
ENSMUSG00000026199	protein_coding	Ankzf1		chr1	75192151	75199387	7237	+	334	364	406	494	289	259	355	289	341	298	264	378	376	352	363	344	327
ENSMUSG00000026200	protein_coding	Glb1l	ncRNA_host	chr1	75198236	75210813	12578	-	102	120	84	179	111	84	103	124	107	92	88	140	130	145	106	87	113
ENSMUSG00000026201	protein_coding	Stk16		chr1	75210838	75215606	4769	+	465	408	710	542	402	470	506	463	572	452	410	517	468	615	637	596	523
ENSMUSG00000026202	protein_coding	Tuba4a		chr1	75214228	75219865	5638	-	6152	6365	12757	6047	5844	5551	6375	5586	5306	6202	6086	5420	7642	5442	6115	6587	5064
ENSMUSG00000026203	protein_coding	Dnajb2		chr1	75236406	75245692	9287	+	1008	1204	1392	1095	1034	932	994	1000	1062	1205	1052	1156	1333	1118	1441	1288	1106
ENSMUSG00000026209	protein_coding	Dnpep		chr1	75307896	75317990	10095	-	1128	1320	1586	1397	1333	1298	1330	1302	1452	1305	1139	1235	1318	1365	1388	1331	1247
ENSMUSG00000026208	protein_coding	Des		chr1	75360329	75368579	8251	+	3140	5115	4814	6009	5445	5273	5058	6314	6431	5325	4508	4853	5520	4507	3095	6008	4017
ENSMUSG00000026207	protein_coding	Speg		chr1	75375297	75432320	57024	+	260	545	364	638	487	515	472	474	518	377	321	489	543	452	291	580	377
ENSMUSG00000033021	protein_coding	Gmppa		chr1	75435930	75443179	7250	+	601	780	810	873	667	642	721	710	727	622	584	657	798	805	831	748	708
ENSMUSG00000032997	protein_coding	Chpf		chr1	75474569	75479307	4739	-	257	401	345	385	328	278	370	302	345	295	374	350	486	321	440	378	355
ENSMUSG00000026211	protein_coding	Obsl1		chr1	75479310	75506452	27143	-	255	394	339	432	307	323	290	337	300	288	283	353	427	341	271	417	302
ENSMUSG00000032968	protein_coding	Inha		chr1	75507077	75510366	3290	+	79	96	85	154	93	80	105	108	106	59	73	108	144	97	101	104	86
ENSMUSG00000026213	protein_coding	Stk11ip		chr1	75521529	75537335	15807	+	476	670	661	818	592	524	606	506	538	432	454	551	601	502	575	552	503
ENSMUSG00000006576	protein_coding	Slc4a3		chr1	75546266	75562172	15907	+	150	231	188	295	194	205	231	226	235	184	211	240	281	255	261	315	222
ENSMUSG00000026235	protein_coding	Epha4	ncRNA_host	chr1	77367185	77515088	147904	-	669	686	1096	626	476	439	530	443	531	605	694	553	831	615	801	766	645
ENSMUSG00000032908	protein_coding	Sgpp2	overlapping_locus	chr1	78310345	78420289	109945	+	1155	1332	1565	1099	1428	1088	1391	1642	2593	1248	737	1219	1037	1795	1952	2005	2205
ENSMUSG00000026245	protein_coding	Farsb	overlapping_locus	chr1	78417975	78488897	70923	-	536	704	958	689	606	570	572	555	596	600	583	569	655	585	665	636	608
ENSMUSG00000032883	protein_coding	Acsl3	overlapping_locus	chr1	78657825	78707743	49919	+	487	501	539	512	625	502	480	565	522	531	555	481	544	569	537	541	521
ENSMUSG00000079470	protein_coding	Utp14b	overlapping_locus	chr1	78658038	78671512	13475	+	103	150	125	140	130	114	118	128	118	108	128	102	145	113	125	132	96
ENSMUSG00000047330	protein_coding	Kcne4		chr1	78816758	78820028	3271	+	70	73	31	106	73	80	107	73	72	76	91	84	79	91	76	59	79
ENSMUSG00000054702	protein_coding	Ap1s3	overlapping_locus	chr1	79606876	79671972	65097	-	223	253	384	236	209	214	236	227	274	241	272	226	272	243	266	195	200
ENSMUSG00000073643	protein_coding	Wdfy1		chr1	79702262	79776143	73882	-	629	777	818	857	740	573	694	613	678	687	681	676	826	612	730	688	671
ENSMUSG00000026248	protein_coding	Mrpl44		chr1	79776018	79781445	5428	+	660	632	784	621	682	692	661	678	745	634	595	565	610	694	731	633	582
ENSMUSG00000026249	protein_coding	Serpine2		chr1	79794197	79861180	66984	-	604	848	739	895	776	703	737	819	698	896	986	879	937	745	873	774	815
ENSMUSG00000043230	protein_coding	Fam124b		chr1	80198706	80218473	19768	-	49	43	97	64	36	38	49	38	57	35	41	49	48	46	54	36	33
ENSMUSG00000004364	protein_coding	Cul3	overlapping_locus	chr1	80264923	80340480	75558	-	4076	4289	5187	5361	4286	3892	4185	3927	4187	4027	4413	3702	5159	3596	4428	4223	3669
ENSMUSG00000038608	protein_coding	Dock10	overlapping_locus	chr1	80501073	80758527	257455	-	138	189	165	274	128	127	204	133	196	147	163	249	263	206	220	169	192
ENSMUSG00000055980	protein_coding	Irs1		chr1	82233101	82291416	58316	-	324	601	757	570	394	375	465	422	455	417	373	500	582	414	512	568	546
ENSMUSG00000026142	protein_coding	Rhbdd1	overlapping_locus	chr1	82316452	82445366	128915	+	639	747	873	871	700	673	701	646	759	676	688	618	756	630	805	648	693
ENSMUSG00000067158	protein_coding	Col4a4		chr1	82448423	82586849	138427	-	92	99	77	145	99	86	105	95	101	86	101	102	115	91	148	103	81
ENSMUSG00000079465	protein_coding	Col4a3	ncRNA_host	chr1	82586921	82722059	135139	+	38	77	39	91	44	39	40	51	47	51	47	53	61	50	70	63	52
ENSMUSG00000026150	protein_coding	Mff	overlapping_locus	chr1	82724890	82752394	27505	+	1781	1654	1772	2318	1844	1842	1976	1885	2203	1737	1868	1635	1816	1804	1735	1745	1508
ENSMUSG00000026159	protein_coding	Agfg1		chr1	82839483	82901182	61700	+	1353	1686	2121	1841	1374	1303	1575	1357	1417	1373	1493	1487	1871	1504	1658	1530	1395
ENSMUSG00000113880	protein_coding	A030005L19Rik		chr1	82913325	82914130	806	+	64	62	44	18	50	43	42	13	28	26	141	31	80	17	49	60	25
ENSMUSG00000113973	protein_coding	A030014E15Rik		chr1	82924917	82925712	796	+	67	89	67	14	94	39	42	25	38	54	158	58	126	23	52	93	35
ENSMUSG00000038496	protein_coding	Slc19a3		chr1	83012523	83038448	25926	-	128	169	142	151	158	122	186	138	183	139	133	118	158	176	153	135	141
ENSMUSG00000100190	protein_coding	Krtap28-10		chr1	83041524	83042480	957	-	89	86	82	23	95	48	80	26	82	61	171	67	155	27	73	77	43
ENSMUSG00000113267	protein_coding	Gm47969		chr1	83044932	83045946	1015	+	33	64	44	11	74	24	33	11	28	43	115	24	74	11	55	37	10
ENSMUSG00000104423	protein_coding	A030005K14Rik		chr1	83058286	83059378	1093	-	62	90	50	21	95	35	51	25	44	54	143	48	127	18	57	81	36
ENSMUSG00000101315	protein_coding	Krtap28-13		chr1	83060930	83061921	992	+	87	84	85	14	82	56	71	18	62	73	171	66	129	21	66	96	34
ENSMUSG00000045658	protein_coding	Pid1	overlapping_locus	chr1	84036296	84364180	327885	-	213	246	218	340	252	215	254	285	244	247	284	255	326	248	349	259	288
ENSMUSG00000026219	protein_coding	Trip12	overlapping_locus	chr1	84721189	84840516	119328	-	3971	5508	6341	6009	4800	4181	4981	4067	4307	4463	4616	4705	6036	4055	4980	4670	4259
ENSMUSG00000073633	protein_coding	Fbxo36		chr1	84839841	84900487	60647	+	88	78	61	127	115	88	92	94	103	85	75	83	93	104	85	96	78
ENSMUSG00000026220	protein_coding	Slc16a14		chr1	84905898	84935134	29237	-	187	226	482	222	190	185	203	153	205	185	181	176	263	155	219	237	183
ENSMUSG00000026222	protein_coding	Sp100	ncRNA_host	chr1	85649988	85709998	60011	+	198	226	151	273	113	126	127	118	148	171	248	256	234	184	151	178	160
ENSMUSG00000036707	protein_coding	Cab39		chr1	85793441	85851576	58136	+	3706	4665	4849	4961	4701	4309	4835	4081	4038	4176	4173	3864	4902	3574	4047	3893	3465
ENSMUSG00000026223	protein_coding	Itm2c		chr1	85894281	85908675	14395	+	1745	2364	1805	2313	2218	1986	2230	2260	2105	2068	2018	2006	2087	2036	2651	1944	2029
ENSMUSG00000026229	protein_coding	Psmd1	overlapping_locus	chr1	86064387	86139151	74765	+	2443	3119	4029	3140	3066	2537	2932	2724	2759	2614	2480	2401	3194	2332	2748	2587	2538
ENSMUSG00000062590	protein_coding	Armc9	overlapping_locus	chr1	86154780	86278284	123505	+	162	201	200	226	162	146	183	153	172	158	133	163	178	157	171	152	167
ENSMUSG00000026234	protein_coding	Ncl	ncRNA_host	chr1	86344719	86359400	14682	-	9794	13550	17752	12404	13105	11635	11788	10795	9482	10682	10328	10493	12450	8461	10870	10245	9606
ENSMUSG00000073627	lncRNA	C130036L24Rik		chr1	86359574	86373791	14218	+	42	61	60	60	43	54	44	39	58	46	37	42	42	55	52	54	39
ENSMUSG00000026238	protein_coding	Ptma		chr1	86526726	86530712	3987	+	2365	2387	3320	2377	1949	2403	2671	2290	2402	2157	1811	1992	2555	2193	2772	2312	1914
ENSMUSG00000026239	protein_coding	Pde6d		chr1	86542994	86582629	39636	-	301	315	334	371	337	310	339	367	416	370	336	359	309	404	396	378	358
ENSMUSG00000026240	protein_coding	Cops7b		chr1	86582904	86609375	26472	+	299	315	347	369	252	238	256	277	288	282	262	255	353	317	265	292	267
ENSMUSG00000053333	protein_coding	Dis3l2	overlapping_locus	chr1	86703808	87050095	346288	+	528	716	753	707	654	553	627	607	548	507	584	495	678	484	612	509	510
ENSMUSG00000026251	protein_coding	Chrnd		chr1	87190607	87200070	9464	+	75	116	97	136	128	124	98	114	94	74	86	73	111	90	74	124	73
ENSMUSG00000026254	protein_coding	Eif4e2		chr1	87213914	87240488	26575	+	1308	1347	1532	1442	1260	1252	1382	1223	1483	1265	1281	1115	1277	1250	1342	1277	1106
ENSMUSG00000026255	protein_coding	Efhd1		chr1	87264363	87310839	46477	+	103	134	96	95	123	113	122	117	95	114	110	128	149	115	150	119	108
ENSMUSG00000048000	protein_coding	Gigyf2		chr1	87326998	87450796	123799	+	1019	1331	1741	1525	1190	1038	1201	1001	1139	1137	1142	1257	1459	1135	1327	1339	1166
ENSMUSG00000026258	protein_coding	Snorc		chr1	87470271	87475482	5212	+	486	594	376	477	542	559	475	534	574	549	727	516	406	539	779	571	486
ENSMUSG00000026259	protein_coding	Ngef	overlapping_locus	chr1	87476834	87573870	97037	-	274	295	406	336	239	226	280	233	239	331	298	251	377	253	298	277	220
ENSMUSG00000079434	protein_coding	Neu2	overlapping_locus	chr1	87509889	87597845	87957	+	40	72	58	66	68	64	55	79	95	52	55	42	70	62	82	105	67
ENSMUSG00000026288	protein_coding	Inpp5d		chr1	87620312	87720507	100196	+	225	304	308	359	239	201	295	177	225	211	248	294	387	256	325	253	292
ENSMUSG00000026289	protein_coding	Atg16l1	ncRNA_host	chr1	87755870	87792428	36559	+	701	803	795	989	786	705	833	708	788	662	726	794	889	758	840	812	701
ENSMUSG00000070738	protein_coding	Dgkd	overlapping_locus	chr1	87853287	87945180	91894	+	834	1162	1015	1329	1088	985	1161	945	1019	1038	944	1079	1226	944	1094	1158	1043
ENSMUSG00000005501	protein_coding	Usp40		chr1	87945119	88008551	63433	-	433	479	707	670	429	406	483	427	513	517	455	531	623	516	558	512	512
ENSMUSG00000054545	protein_coding	Ugt1a6a	overlapping_locus	chr1	88134809	88218997	84189	+	53	56	64	84	38	41	84	56	59	40	47	62	64	63	50	65	74
ENSMUSG00000081984	protein_coding	Dnajb3	overlapping_locus	chr1	88204732	88205782	1051	-	113	95	119	71	97	96	137	140	112	128	127	92	114	80	131	95	95
ENSMUSG00000089960	protein_coding	Ugt1a1	overlapping_locus	chr1	88211959	88218997	7039	+	574	608	741	654	719	598	709	670	694	598	563	511	674	618	580	611	580
ENSMUSG00000079429	protein_coding	Mroh2a		chr1	88226986	88262289	35304	+	46	62	72	87	67	60	46	46	48	41	71	56	48	62	70	64	54
ENSMUSG00000044783	protein_coding	Hjurp		chr1	88262471	88277633	15163	-	1657	2328	2410	2655	2191	1827	2226	1757	2089	1613	1567	1891	2143	1949	2045	1918	1867
ENSMUSG00000049866	protein_coding	Arl4c		chr1	88673125	88702221	29097	-	2256	2904	2945	2599	2706	2576	2831	2835	2266	2221	2439	2646	2930	2410	2725	2618	2297
ENSMUSG00000036206	protein_coding	Sh3bp4	overlapping_locus	chr1	89070415	89155068	84654	+	369	540	576	472	483	473	473	438	405	492	456	513	557	455	529	461	437
ENSMUSG00000055013	protein_coding	Agap1	overlapping_locus	chr1	89454806	89897617	442812	+	507	750	712	711	702	684	746	625	568	554	643	643	782	570	751	661	626
ENSMUSG00000044337	protein_coding	Ackr3		chr1	90203980	90216751	12772	+	957	1223	1373	1252	1263	1247	1454	1383	1294	1142	1096	989	1083	1123	1224	1168	994
ENSMUSG00000034432	protein_coding	Cops8		chr1	90602981	90613341	10361	+	1069	1258	1329	1326	1333	1218	1289	1087	1114	1140	1125	1089	1219	1143	1229	1158	1070
ENSMUSG00000048126	protein_coding	Col6a3	overlapping_locus	chr1	90765923	90843971	78049	-	1615	3271	3802	2880	2182	1726	2184	1901	1792	1706	2787	2472	3502	2568	3471	2792	3046
ENSMUSG00000026303	protein_coding	Mlph		chr1	90915085	90951142	36058	+	106	154	144	125	125	124	129	116	102	158	120	118	156	105	155	132	133
ENSMUSG00000026304	protein_coding	Rab17		chr1	90958133	90969661	11529	-	63	37	39	48	38	69	65	40	72	73	65	44	43	46	74	60	60
ENSMUSG00000026305	protein_coding	Lrrfip1		chr1	90998737	91128944	130208	+	1005	1253	1449	1309	1101	1056	1240	1054	1056	1210	1077	1203	1492	1113	1244	1278	1122
ENSMUSG00000034353	protein_coding	Ramp1		chr1	91179822	91225196	45375	+	503	589	377	557	685	660	590	662	756	600	655	471	477	666	519	753	514
ENSMUSG00000034343	protein_coding	Ube2f		chr1	91250304	91290337	40034	+	756	756	842	825	701	678	766	701	865	777	780	721	856	691	781	743	578
ENSMUSG00000026307	protein_coding	Scly		chr1	91298338	91321075	22738	+	199	284	299	265	213	203	224	250	230	254	212	245	270	253	247	234	250
ENSMUSG00000026308	protein_coding	Klhl30		chr1	91351016	91362416	11401	+	62	84	80	96	137	94	95	94	97	155	84	124	145	77	61	106	77
ENSMUSG00000026309	protein_coding	Ilkap		chr1	91373861	91398815	24955	-	933	1025	1044	1259	1060	1109	1159	1113	1152	1022	960	1109	1082	1124	1100	1100	990
ENSMUSG00000067071	protein_coding	Hes6		chr1	91411483	91414038	2556	-	375	374	363	471	403	383	378	412	505	434	449	389	366	423	439	402	346
ENSMUSG00000055866	protein_coding	Per2		chr1	91415982	91459324	43343	-	424	638	434	976	748	591	857	511	606	562	435	447	578	413	555	584	495
ENSMUSG00000034292	protein_coding	Traf3ip1		chr1	91494647	91529307	34661	+	111	135	128	137	89	105	115	131	113	143	111	146	165	120	157	145	138
ENSMUSG00000026311	protein_coding	Asb1		chr1	91540544	91559589	19046	+	136	203	139	218	182	195	193	161	187	196	199	172	226	159	219	180	183
ENSMUSG00000007805	protein_coding	Twist2	overlapping_locus	chr1	91801461	91848028	46568	+	67	81	73	111	93	82	105	96	76	93	107	99	122	125	148	97	102
ENSMUSG00000026313	protein_coding	Hdac4	overlapping_locus	chr1	91928779	92195699	266921	-	574	895	917	814	816	721	783	656	586	667	683	761	886	590	750	709	663
ENSMUSG00000026260	protein_coding	Ndufa10	ncRNA_host	chr1	92439010	92473860	34851	-	2673	3154	3607	3560	3475	3299	3296	3359	3191	2900	2760	2681	3022	2917	3110	3085	2746
ENSMUSG00000073616	protein_coding	Cops9		chr1	92637145	92641985	4841	-	973	664	773	765	806	940	930	827	1118	771	947	663	603	939	966	854	697
ENSMUSG00000044055	protein_coding	Otos		chr1	92644218	92648841	4624	-	41	43	33	71	40	55	35	64	82	60	77	48	38	65	66	53	48
ENSMUSG00000034220	protein_coding	Gpc1	ncRNA_host	chr1	92831645	92860779	29135	+	1567	2441	2318	2066	2158	2141	2077	1965	1858	1903	1785	1855	2293	1626	1953	2167	1730
ENSMUSG00000047067	protein_coding	Dusp28		chr1	92906981	92908435	1455	+	354	362	311	330	323	347	340	385	399	309	343	301	313	287	348	336	314
ENSMUSG00000097251	lncRNA	5033417F24Rik		chr1	92908378	92910764	2387	-	65	54	98	81	45	48	58	75	99	70	53	64	67	66	61	56	62
ENSMUSG00000026269	protein_coding	Rnpepl1		chr1	92910783	92924384	13602	+	2478	3307	3769	3477	2854	2715	3114	2792	2789	2573	2502	2916	3272	2535	3288	2972	2781
ENSMUSG00000026270	protein_coding	Capn10		chr1	92934376	92947941	13566	+	585	715	804	679	656	558	645	581	730	627	570	642	659	637	786	645	657
ENSMUSG00000026271	protein_coding	Gpr35		chr1	92950865	92986391	35527	+	61	61	78	57	39	43	52	29	32	59	58	72	76	46	57	72	65
ENSMUSG00000014602	protein_coding	Kif1a		chr1	93015464	93101951	86488	-	74	159	120	160	157	127	153	131	120	130	123	188	225	125	184	141	180
ENSMUSG00000034159	protein_coding	Mab21l4		chr1	93151349	93160948	9600	-	550	499	816	468	460	314	497	371	417	621	669	563	693	529	607	578	507
ENSMUSG00000047793	protein_coding	Sned1	ncRNA_host	chr1	93235841	93301065	65225	+	418	679	602	1118	467	436	653	508	483	408	434	692	870	693	639	711	727
ENSMUSG00000026273	protein_coding	Mterf4		chr1	93299211	93305915	6705	-	251	250	310	271	242	271	213	299	274	257	269	257	256	251	295	265	249
ENSMUSG00000026274	protein_coding	Pask		chr1	93308770	93343482	34713	-	144	132	208	174	146	106	142	111	137	78	87	125	118	146	116	139	112
ENSMUSG00000026275	protein_coding	Ppp1r7	ncRNA_host	chr1	93342854	93373489	30636	+	783	962	1256	944	920	831	901	873	872	836	909	894	1054	833	1084	908	859
ENSMUSG00000034107	protein_coding	Ano7		chr1	93373930	93404303	30374	+	290	310	367	462	258	288	424	263	298	331	352	402	576	500	591	535	484
ENSMUSG00000034088	protein_coding	Hdlbp		chr1	93405940	93478815	72876	-	5761	7993	10080	7789	7388	6163	6937	6238	6187	5979	5683	6082	7623	5594	7330	6938	6014
ENSMUSG00000034066	protein_coding	Farp2	overlapping_locus	chr1	93512079	93621976	109898	+	175	267	302	294	246	200	231	200	204	201	196	187	266	178	220	217	193
ENSMUSG00000026277	protein_coding	Stk25		chr1	93619751	93658659	38909	-	1141	1234	1424	1566	1135	1173	1309	1302	1391	1323	1229	1261	1386	1450	1459	1562	1291
ENSMUSG00000026278	protein_coding	Bok		chr1	93685660	93695764	10105	+	1288	1309	1779	1217	1393	1385	1530	1153	1079	1463	1171	1089	1245	1137	1349	1277	1051
ENSMUSG00000026279	protein_coding	Thap4		chr1	93701935	93754864	52930	-	639	657	687	652	671	597	656	583	588	624	546	525	636	513	623	572	535
ENSMUSG00000026280	protein_coding	Atg4b		chr1	93751500	93790610	39111	+	885	943	1127	1098	943	810	1000	780	934	848	850	806	968	851	950	910	858
ENSMUSG00000026281	protein_coding	Dtymk		chr1	93792576	93801934	9359	-	541	481	644	574	472	512	514	536	607	476	463	471	394	688	641	592	441
ENSMUSG00000026283	protein_coding	Ing5		chr1	93803965	93822101	18137	+	330	383	383	456	421	385	442	319	349	352	315	320	376	367	420	398	391
ENSMUSG00000073609	protein_coding	D2hgdh		chr1	93824909	93852348	27440	+	42	54	64	55	37	37	42	42	60	47	45	42	58	55	48	51	70
ENSMUSG00000051185	protein_coding	Fam174a	overlapping_locus	chr1	95313623	95335284	21662	+	717	624	720	765	656	685	811	829	958	755	671	640	679	777	839	705	604
ENSMUSG00000081051	processed_pseudogene	Gm15427	pseudo_consens	chr1	95498621	95499151	531	+	99	118	107	109	108	103	124	92	95	79	95	78	94	71	117	88	78
ENSMUSG00000040710	protein_coding	St8sia4	overlapping_locus	chr1	95587682	95667571	79890	-	113	99	86	149	81	75	107	86	148	124	131	132	154	129	139	115	122
ENSMUSG00000044768	protein_coding	D1Ertd622e		chr1	97606318	97662074	55757	-	277	372	452	419	382	357	393	354	313	301	296	284	364	348	355	359	299
ENSMUSG00000040648	protein_coding	Ppip5k2		chr1	97706048	97770411	64364	-	549	693	865	813	605	613	594	602	576	536	579	673	733	529	675	599	595
ENSMUSG00000026333	protein_coding	Gin1		chr1	97770172	97793709	23538	+	167	180	193	241	178	170	187	185	240	137	176	163	146	209	176	193	187
ENSMUSG00000026335	protein_coding	Pam	overlapping_locus	chr1	97795114	98095646	300533	-	3794	4872	4818	5594	4536	4113	4900	4485	4602	4391	5161	4149	4623	4346	5410	4644	4275
ENSMUSG00000089782	processed_pseudogene	Gm3531	overlapping_locus	chr1	97948901	97949389	489	-	66	71	69	55	58	64	72	71	93	80	67	51	51	54	73	75	72
ENSMUSG00000047496	protein_coding	Rnf152		chr1	105276914	105356710	79797	-	151	200	148	239	174	144	174	121	152	188	162	174	161	135	220	186	144
ENSMUSG00000056536	protein_coding	Pign	overlapping_locus	chr1	105518422	105663677	145256	-	653	857	981	873	653	623	761	762	744	731	737	732	868	657	873	781	703
ENSMUSG00000026319	protein_coding	Relch	overlapping_locus	chr1	105663861	105755191	91331	+	1048	1259	1414	1589	1006	1051	1337	974	1119	1003	1064	1186	1358	1209	1226	1208	1018
ENSMUSG00000026321	protein_coding	Tnfrsf11a		chr1	105780718	105847981	67264	+	353	444	489	507	352	330	338	314	389	363	386	403	593	314	471	406	366
ENSMUSG00000099843	lncRNA	Gm7160		chr1	105979350	105990282	10933	-	42	41	50	69	37	42	46	48	54	58	43	56	68	42	45	37	46
ENSMUSG00000038866	protein_coding	Zcchc2		chr1	105990406	106034074	43669	+	614	908	945	1094	693	697	828	658	682	669	710	769	991	637	860	740	689
ENSMUSG00000044340	protein_coding	Phlpp1	overlapping_locus	chr1	106171752	106394250	222499	+	356	518	584	539	567	498	532	425	404	419	485	556	561	377	580	515	482
ENSMUSG00000057329	protein_coding	Bcl2	overlapping_locus	chr1	106538178	106714274	176097	-	256	364	327	340	319	306	321	262	255	345	373	441	442	259	335	303	309
ENSMUSG00000009905	protein_coding	Kdsr		chr1	106720459	106759727	39269	-	2066	2226	2201	2389	2164	1959	2283	2012	2391	2056	2026	1673	1978	2014	2011	1743	1834
ENSMUSG00000009907	protein_coding	Vps4b		chr1	106764071	106796728	32658	-	2480	2943	3259	2882	2732	2536	2940	2445	2628	2479	2620	2459	2879	2453	2868	2615	2350
ENSMUSG00000067006	protein_coding	Serpinb5		chr1	106861173	106883348	22176	+	14236	12430	22729	13813	12183	11818	13340	11718	14177	13461	14338	11170	14738	12408	15012	13066	11705
ENSMUSG00000059956	protein_coding	Serpinb12		chr1	106934449	106957080	22632	+	1931	1425	2597	1781	1297	1267	1431	1211	1649	1048	1499	1058	1659	1454	2187	1583	1450
ENSMUSG00000048775	protein_coding	Serpinb13		chr1	106980984	107001195	20212	+	253	232	344	343	223	184	211	153	236	200	224	172	282	238	355	263	242
ENSMUSG00000073602	protein_coding	Serpinb3b		chr1	107153940	107278361	124422	-	5405	4359	7368	7303	3914	4039	4784	4565	5932	3928	5330	4440	5214	5377	6408	5700	4750
ENSMUSG00000073601	protein_coding	Serpinb3c		chr1	107271201	107278371	7171	-	182	149	251	251	145	181	160	159	219	140	209	167	153	153	243	177	142
ENSMUSG00000026327	protein_coding	Serpinb11		chr1	107361198	107380475	19278	+	288	271	389	296	224	208	235	267	236	230	224	208	206	301	368	270	304
ENSMUSG00000067001	protein_coding	Serpinb7		chr1	107399655	107452689	53035	+	3265	3200	3622	4680	3394	3810	4151	4061	5537	3780	4542	3820	3866	4207	4739	4323	3462
ENSMUSG00000062345	protein_coding	Serpinb2	overlapping_locus	chr1	107511423	107535478	24056	+	4573	4148	7742	6537	4339	6422	6647	5438	6219	5777	3803	3579	4403	4551	4406	4186	3774
ENSMUSG00000092572	polymorphic_pseudogene	Serpinb10	overlapping_locus	chr1	107529003	107549271	20269	+	915	1111	1657	1505	1298	1540	1444	1529	1567	1641	1118	1188	1089	1249	1219	1184	1291
ENSMUSG00000026315	protein_coding	Serpinb8		chr1	107590006	107610484	20479	+	1797	1884	2575	2479	1390	1485	1627	1504	1895	2129	2152	1849	2565	1750	2157	1793	1575
ENSMUSG00000047216	protein_coding	Cdh19	overlapping_locus	chr1	110888326	110977584	89259	-	202	224	165	307	207	256	230	202	234	295	287	332	298	228	265	254	247
ENSMUSG00000038702	protein_coding	Dsel		chr1	111858702	111864918	6217	-	661	768	904	862	779	697	849	734	687	739	776	729	802	714	884	770	727
ENSMUSG00000026374	protein_coding	Tsn		chr1	118294778	118311739	16962	-	1548	1900	1987	1915	1899	1878	1809	1743	1749	1553	1656	1557	1589	1637	1794	1748	1546
ENSMUSG00000026377	protein_coding	Nifk		chr1	118321839	118333822	11984	+	973	1034	1454	1023	1117	1072	1129	1018	947	1087	972	895	959	1001	1129	1001	945
ENSMUSG00000064302	protein_coding	Clasp1		chr1	118389058	118612678	223621	+	1169	1887	2126	1833	1565	1338	1567	1239	1282	1232	1411	1521	1815	1240	1644	1568	1510
ENSMUSG00000048402	protein_coding	Gli2		chr1	118834132	119053619	219488	-	229	438	332	361	358	327	362	249	228	276	316	331	397	232	326	264	279
ENSMUSG00000037035	protein_coding	Inhbb		chr1	119415465	119422248	6784	-	389	420	505	490	408	342	553	434	343	427	407	461	563	357	557	455	476
ENSMUSG00000004451	protein_coding	Ralb		chr1	119470305	119504794	34490	-	641	669	787	677	684	644	673	584	616	693	597	627	749	685	741	646	612
ENSMUSG00000098923	protein_coding	Tmem185b	retrogene	chr1	119526160	119528983	2824	+	222	235	289	250	223	249	278	220	238	262	245	251	268	270	294	255	207
ENSMUSG00000026383	protein_coding	Epb41l5	overlapping_locus	chr1	119545037	119649000	103964	-	171	187	266	260	196	194	208	152	222	234	242	222	221	191	261	201	161
ENSMUSG00000026384	protein_coding	Ptpn4	overlapping_locus	chr1	119652467	119837613	185147	-	704	946	906	935	815	742	950	665	802	698	733	785	839	719	826	789	649
ENSMUSG00000036975	protein_coding	Tmem177		chr1	119907890	119913208	5319	-	216	309	257	414	269	206	253	265	274	219	338	253	393	245	369	313	262
ENSMUSG00000050777	protein_coding	Tmem37		chr1	120067377	120074074	6698	-	99	128	69	152	113	150	106	105	181	162	132	130	188	106	91	115	73
ENSMUSG00000026385	protein_coding	Dbi		chr1	120113280	120121078	7799	-	6640	5448	5998	5822	5884	5911	6553	5566	6948	5219	6305	4662	5271	6267	7323	6023	5105
ENSMUSG00000026388	protein_coding	3110009E18Rik		chr1	120121187	120188189	67003	+	95	82	119	115	89	103	110	82	119	128	99	72	83	120	101	94	119
ENSMUSG00000026389	protein_coding	Steap3		chr1	120190757	120272705	81949	-	372	517	480	671	483	392	540	543	529	470	566	517	740	603	701	597	599
ENSMUSG00000026390	protein_coding	Marco		chr1	120474538	120505024	30487	-	28	81	25	72	22	25	61	40	26	34	40	59	45	60	63	45	134
ENSMUSG00000003721	protein_coding	Insig2		chr1	121304353	121332589	28237	-	2823	2594	3056	2648	2557	2211	2867	2374	2871	2796	2856	2387	2673	2436	2815	2475	2118
ENSMUSG00000026339	protein_coding	Ccdc93		chr1	121431049	121506460	75412	+	362	496	588	643	422	405	448	398	454	491	516	491	601	409	490	465	501
ENSMUSG00000001674	protein_coding	Ddx18		chr1	121553835	121567989	14155	-	213	262	363	265	247	200	286	239	222	225	204	216	232	234	263	255	211
ENSMUSG00000026341	protein_coding	Actr3		chr1	125392905	125435727	42823	-	2170	2343	3072	2501	2144	2065	2298	2173	2189	2314	2263	2113	2347	2370	2513	2300	2034
ENSMUSG00000026342	protein_coding	Slc35f5		chr1	125560595	125595820	35226	+	1485	1532	1718	1695	1340	1269	1549	1359	1740	1532	1612	1416	1626	1507	1679	1530	1378
ENSMUSG00000036155	protein_coding	Mgat5	overlapping_locus	chr1	127205015	127488336	283322	+	514	870	985	779	689	589	691	614	513	589	660	751	740	517	805	672	610
ENSMUSG00000026349	protein_coding	Ccnt2		chr1	127774164	127808061	33898	+	845	1115	1039	1555	939	901	1172	912	1005	868	895	1096	1245	1021	1120	1138	930
ENSMUSG00000036104	protein_coding	Rab3gap1		chr1	127868773	127943868	75096	+	1176	1439	1654	1435	1334	1211	1356	1160	1190	1116	1339	1252	1493	1054	1366	1286	1142
ENSMUSG00000036086	protein_coding	Zranb3	overlapping_locus	chr1	127954184	128103047	148864	-	66	93	87	91	84	65	77	95	86	71	70	110	91	71	102	78	81
ENSMUSG00000056211	protein_coding	R3hdm1	overlapping_locus	chr1	128103301	128237736	134436	+	769	1064	1079	1292	989	901	1018	940	860	817	857	996	1205	874	946	1039	930
ENSMUSG00000026353	protein_coding	Ubxn4		chr1	128243964	128279378	35415	+	1906	2161	2637	2411	2113	2011	2197	1925	2011	2176	1974	1959	2384	1895	2174	1942	1939
ENSMUSG00000026355	protein_coding	Mcm6		chr1	128331590	128359664	28075	-	1374	1654	2387	1565	1356	1178	1270	1289	1260	1082	982	978	1205	1397	1353	1395	1234
ENSMUSG00000026356	protein_coding	Dars		chr1	128363707	128417368	53662	-	1238	1347	2032	1503	1383	1286	1439	1440	1453	1319	1317	1194	1397	1394	1432	1448	1314
ENSMUSG00000045382	protein_coding	Cxcr4		chr1	128588199	128592293	4095	-	103	121	85	79	95	70	90	82	90	62	80	74	92	84	88	59	57
ENSMUSG00000086825	lncRNA	Gm15675		chr1	130429781	130437191	7411	-	88	119	84	197	90	90	117	97	109	100	96	118	136	148	133	122	127
ENSMUSG00000026399	protein_coding	Cd55		chr1	130439027	130462744	23718	-	482	620	705	766	548	586	700	674	662	752	756	735	855	677	739	838	767
ENSMUSG00000026409	protein_coding	Pfkfb2	overlapping_locus	chr1	130689182	130729253	40072	-	267	393	358	453	312	315	455	287	353	329	284	359	422	309	369	441	343
ENSMUSG00000046404	protein_coding	Yod1		chr1	130717327	130724358	7032	+	757	766	952	972	710	630	769	639	741	690	766	701	1130	694	993	803	672
ENSMUSG00000042510	protein_coding	AA986860		chr1	130731976	130744622	12647	+	700	694	1071	865	626	541	653	523	779	675	726	675	958	671	906	812	627
ENSMUSG00000026415	protein_coding	Fcamr		chr1	130800902	130814740	13839	+	45	51	85	63	34	55	40	32	63	38	41	48	65	41	55	52	37
ENSMUSG00000016528	protein_coding	Mapkapk2	overlapping_locus	chr1	131053700	131097826	44127	-	2167	2844	2748	2671	2641	2369	2680	2322	2248	2499	2379	2310	2707	2000	2559	2554	2058
ENSMUSG00000026427	protein_coding	Eif2d		chr1	131153181	131187658	34478	+	808	802	1071	877	728	726	844	834	893	864	840	793	851	838	943	940	700
ENSMUSG00000026430	protein_coding	Rassf5		chr1	131176410	131245258	68849	-	639	971	963	933	729	578	723	613	746	693	815	787	1124	686	1018	760	722
ENSMUSG00000042349	protein_coding	Ikbke		chr1	131254343	131279606	25264	-	292	339	456	394	266	277	322	334	390	311	334	416	354	405	412	412	373
ENSMUSG00000026425	protein_coding	Srgap2	overlapping_locus	chr1	131285251	131527352	242102	-	1208	1680	2151	2260	1311	1146	1535	1294	1406	1287	1478	1711	2194	1380	1956	1763	1464
ENSMUSG00000004552	protein_coding	Ctse		chr1	131638306	131675505	37200	+	26	45	38	70	36	30	37	49	23	46	69	64	82	38	68	40	29
ENSMUSG00000052688	protein_coding	Rab7b		chr1	131688695	131715439	26745	+	908	1088	1367	1087	796	765	894	849	967	1004	971	844	1151	876	1071	943	877
ENSMUSG00000042268	protein_coding	Slc26a9		chr1	131744022	131771504	27483	+	96	97	165	95	68	52	72	60	67	49	47	37	86	57	105	94	58
ENSMUSG00000042251	protein_coding	Pm20d1		chr1	131797381	131821473	24093	+	85	96	69	120	93	95	105	83	87	107	128	95	121	100	131	120	100
ENSMUSG00000013275	protein_coding	Slc41a1		chr1	131827493	131848865	21373	+	849	1505	1123	1561	1461	1299	1284	1132	1239	1161	1226	1156	1595	924	1119	1303	991
ENSMUSG00000026433	protein_coding	Rab29		chr1	131867224	131872887	5664	+	275	212	251	210	221	175	213	201	269	232	263	220	247	257	283	223	225
ENSMUSG00000026434	protein_coding	Nucks1	overlapping_locus	chr1	131910534	131936321	25788	+	1983	2584	2642	2294	2417	2267	2438	2041	1903	1953	2033	2078	2255	2038	2459	2166	1823
ENSMUSG00000026435	protein_coding	Slc45a3	overlapping_locus	chr1	131962967	131982969	20003	+	266	288	302	344	211	217	252	218	284	291	234	268	336	255	362	321	248
ENSMUSG00000026436	protein_coding	Elk4	overlapping_locus	chr1	132007607	132032612	25006	+	1071	1525	1322	1518	1310	1166	1276	1127	1010	1134	1264	1334	1411	886	1196	1128	1047
ENSMUSG00000059149	protein_coding	Mfsd4a		chr1	132022806	132068062	45257	-	382	567	566	540	470	432	496	381	428	424	437	479	607	380	425	427	359
ENSMUSG00000026437	protein_coding	Cdk18		chr1	132112237	132139684	27448	-	64	84	69	78	76	48	86	78	62	63	52	76	92	55	77	60	59
ENSMUSG00000009772	protein_coding	Nuak2		chr1	132316126	132333488	17363	+	438	500	528	541	407	366	450	292	336	417	420	440	532	442	518	487	428
ENSMUSG00000042066	protein_coding	Tmcc2		chr1	132356315	132391281	34967	-	142	283	182	285	219	232	242	230	211	213	248	200	290	204	268	246	211
ENSMUSG00000042046	protein_coding	Dstyk		chr1	132417555	132466958	49404	+	906	1224	1184	1353	1053	979	1191	882	991	993	1063	1130	1285	837	1188	1070	1008
ENSMUSG00000026439	protein_coding	Rbbp5		chr1	132477365	132505659	28295	+	545	614	762	724	552	535	558	518	521	509	515	570	614	556	626	588	554
ENSMUSG00000048174	protein_coding	Tmem81		chr1	132506230	132508639	2410	+	116	161	138	161	138	103	122	120	121	93	125	134	134	148	147	136	116
ENSMUSG00000026442	protein_coding	Nfasc		chr1	132564690	132741797	177108	-	46	91	64	103	92	74	83	74	61	70	51	95	114	60	79	81	79
ENSMUSG00000054387	protein_coding	Mdm4		chr1	132959484	133030561	71078	-	1410	1704	1722	2429	1446	1344	1659	1370	1547	1304	1482	1938	2102	1842	1812	1966	1706
ENSMUSG00000026447	protein_coding	Pik3c2b		chr1	133045667	133108687	63021	+	258	392	353	389	308	276	317	301	289	287	258	303	351	294	334	346	350
ENSMUSG00000046062	protein_coding	Ppp1r15b		chr1	133131143	133139783	8641	+	1146	1567	1770	1649	1427	1330	1438	1277	1322	1517	1441	1340	1631	1283	1614	1421	1338
ENSMUSG00000041757	protein_coding	Plekha6		chr1	133164210	133303435	139226	+	534	770	857	916	611	557	703	647	711	606	675	676	888	616	929	804	663
ENSMUSG00000070643	protein_coding	Sox13		chr1	133382303	133424377	42075	-	282	418	298	417	353	316	334	301	253	302	313	378	400	302	394	292	340
ENSMUSG00000090553	protein_coding	Snrpe		chr1	133603871	133610291	6421	-	644	525	630	611	561	553	610	576	725	565	667	519	406	613	655	609	528
ENSMUSG00000102976	protein_coding	Zc3h11a	overlapping_locus	chr1	133619862	133661380	41519	-	144	262	256	282	170	163	207	204	195	162	156	210	299	169	228	200	175
ENSMUSG00000094410	protein_coding	Gm38394	overlapping_locus	chr1	133619940	133661318	41379	-	43	105	79	118	60	68	118	61	62	68	70	86	120	59	90	71	66
ENSMUSG00000026463	protein_coding	Atp2b4	overlapping_locus	chr1	133699457	133801041	101585	-	4809	7120	9682	7328	5441	4891	6164	5109	4966	6128	6217	6920	8650	5516	7290	6950	6368
ENSMUSG00000041577	protein_coding	Prelp		chr1	133910304	133921414	11111	-	923	1552	1550	1774	1108	1110	1486	1268	1535	1741	1741	1754	2437	1264	2093	1745	1645
ENSMUSG00000041559	protein_coding	Fmod		chr1	134037254	134048277	11024	+	3719	6495	5353	6212	5018	4572	5113	5581	5458	5869	6964	5510	6850	4576	9228	5393	6181
ENSMUSG00000020423	protein_coding	Btg2		chr1	134075170	134079120	3951	-	1205	1200	1442	1277	999	1037	1144	949	1197	1146	1241	1184	1447	876	1392	978	956
ENSMUSG00000026450	protein_coding	Chit1		chr1	134111242	134151540	40299	+	4429	3831	6443	4496	3494	3249	3622	3428	3473	3668	3436	3012	4383	2928	3878	3329	2694
ENSMUSG00000064246	protein_coding	Chil1		chr1	134182176	134190181	8006	+	990	677	695	666	593	462	710	542	677	745	678	628	941	591	808	655	752
ENSMUSG00000042451	protein_coding	Mybph		chr1	134193448	134201232	7785	+	29	39	79	66	54	30	37	32	49	110	93	63	115	76	30	110	108
ENSMUSG00000042429	protein_coding	Adora1		chr1	134199223	134235431	36209	-	54	108	39	93	71	67	67	87	90	89	62	85	120	49	103	57	79
ENSMUSG00000026458	protein_coding	Ppfia4		chr1	134296783	134332928	36146	-	216	293	267	355	246	239	311	297	342	229	331	291	345	317	433	345	280
ENSMUSG00000042305	protein_coding	Tmem183a		chr1	134346097	134361979	15883	-	1459	1309	1434	1737	1394	1362	1536	1282	1564	1309	1258	1375	1363	1510	1458	1410	1369
ENSMUSG00000026456	protein_coding	Cyb5r1		chr1	134405559	134411740	6182	+	459	543	610	762	645	625	596	663	663	594	533	631	592	733	570	824	617
ENSMUSG00000026457	protein_coding	Adipor1		chr1	134415378	134433351	17974	+	5591	6311	6707	6605	6068	5659	6078	6090	6796	6304	6179	5648	6413	5220	6547	5776	5017
ENSMUSG00000026455	protein_coding	Klhl12		chr1	134455531	134491018	35488	+	481	599	615	662	556	485	597	507	485	490	490	448	519	427	484	517	422
ENSMUSG00000042229	protein_coding	Rabif	ncRNA_host	chr1	134494648	134508774	14127	+	572	638	770	654	680	573	661	556	583	607	637	577	655	528	700	607	608
ENSMUSG00000042207	protein_coding	Kdm5b		chr1	134560171	134635285	75115	+	1272	1448	1830	1477	1170	1093	1306	992	1103	1243	1359	1260	1589	1111	1451	1257	1177
ENSMUSG00000073557	protein_coding	Ppp1r12b	overlapping_locus	chr1	134754658	134955942	201285	-	1011	1772	1386	2203	1745	1678	1753	1504	1511	1327	1317	1387	1990	1315	1168	1872	1241
ENSMUSG00000026429	protein_coding	Ube2t		chr1	134962565	134974162	11598	+	101	72	93	88	71	72	83	77	84	64	62	55	60	93	71	74	76
ENSMUSG00000042793	protein_coding	Lgr6		chr1	134983301	135105276	121976	-	1197	1789	2011	1473	1589	1361	1707	1707	1307	1529	1625	1650	1610	1418	1854	1814	1661
ENSMUSG00000097993	polymorphic_pseudogene	Ptprv		chr1	135108497	135132594	24098	-	210	189	156	267	181	149	201	164	184	93	198	145	221	184	242	174	165
ENSMUSG00000031506	protein_coding	Ptpn7		chr1	135132700	135145317	12618	+	80	102	88	132	72	64	89	80	84	89	98	105	127	116	108	98	82
ENSMUSG00000026426	protein_coding	Arl8a	overlapping_locus	chr1	135146824	135156269	9446	+	678	812	810	976	750	727	830	801	728	832	752	842	972	767	922	793	804
ENSMUSG00000026424	protein_coding	Gpr37l1		chr1	135160234	135167681	7448	-	36	97	61	66	66	65	66	79	73	61	50	74	80	48	96	65	78
ENSMUSG00000041926	protein_coding	Rnpep		chr1	135262712	135284084	21373	-	398	437	641	492	393	364	485	342	418	334	308	429	437	393	486	519	431
ENSMUSG00000062580	protein_coding	Timm17a		chr1	135295213	135313778	18566	-	774	863	905	877	893	891	898	878	1046	932	869	777	881	842	834	908	711
ENSMUSG00000048096	protein_coding	Lmod1		chr1	135324807	135368065	43259	+	67	114	75	116	69	95	82	127	110	85	103	113	105	82	101	119	132
ENSMUSG00000041889	protein_coding	Shisa4		chr1	135371057	135375237	4181	-	177	244	181	248	185	205	214	300	289	233	257	226	246	220	257	272	179
ENSMUSG00000041879	protein_coding	Ipo9	overlapping_locus	chr1	135382312	135430499	48188	-	980	1441	1660	1503	1303	1193	1292	1107	1142	1091	1122	1246	1409	1163	1308	1351	1239
ENSMUSG00000009418	protein_coding	Nav1	overlapping_locus	chr1	135434580	135688105	253526	-	442	703	712	864	598	478	687	483	424	542	619	685	1103	499	671	663	614
ENSMUSG00000026421	protein_coding	Csrp1		chr1	135720061	135752232	32172	+	4306	5560	5614	4909	5167	5520	5776	5720	5658	5748	6280	5546	5332	5480	6443	6160	5368
ENSMUSG00000041801	protein_coding	Phlda3		chr1	135766119	135769136	3018	+	1233	1402	2035	1303	1312	1322	1477	1394	1381	1764	1451	1420	1525	1348	1594	1537	1300
ENSMUSG00000026418	protein_coding	Tnni1		chr1	135779434	135810989	31556	+	392	391	300	448	418	420	332	486	539	416	485	327	413	517	241	469	389
ENSMUSG00000041782	protein_coding	Lad1		chr1	135818598	135833342	14745	+	3464	4467	6388	3973	3839	3721	4191	3492	3484	3900	3873	3523	5333	2902	4987	3859	3205
ENSMUSG00000026414	protein_coding	Tnnt2		chr1	135836354	135852260	15907	+	171	207	175	252	240	205	254	214	259	181	310	202	304	277	375	333	282
ENSMUSG00000026413	protein_coding	Pkp1	overlapping_locus	chr1	135871395	135919207	47813	-	20804	28533	40833	25101	24209	22471	24692	19403	19017	21337	21700	22629	30774	18068	28528	22818	20139
ENSMUSG00000026411	protein_coding	Tmem9		chr1	136008150	136035342	27193	+	614	669	562	648	626	635	635	652	744	625	633	593	595	595	680	589	524
ENSMUSG00000026407	protein_coding	Cacna1s	overlapping_locus	chr1	136052750	136119822	67073	+	454	817	575	1268	913	820	777	861	1191	762	679	678	937	651	340	1038	539
ENSMUSG00000041642	protein_coding	Kif21b		chr1	136131389	136177998	46610	+	200	281	161	345	290	208	319	165	174	193	170	266	292	202	210	201	181
ENSMUSG00000041605	protein_coding	Inava		chr1	136213531	136234264	20734	-	374	399	584	530	398	397	422	307	336	322	348	376	519	357	512	427	399
ENSMUSG00000041570	protein_coding	Camsap2		chr1	136268123	136346104	77982	-	1236	1724	2081	1766	1553	1341	1608	1305	1368	1527	1626	1632	1989	1294	1700	1595	1401
ENSMUSG00000026404	protein_coding	Ddx59		chr1	136415271	136440158	24888	+	305	405	478	422	411	332	428	415	381	386	371	368	402	395	435	368	396
ENSMUSG00000041498	protein_coding	Kif14	overlapping_locus	chr1	136466343	136531511	65169	+	96	107	149	142	75	93	65	70	87	85	59	106	124	111	103	84	85
ENSMUSG00000041483	protein_coding	Zfp281		chr1	136624901	136630053	5153	+	294	350	364	412	341	277	388	318	327	311	380	368	406	305	417	343	331
ENSMUSG00000026395	protein_coding	Ptprc	overlapping_locus	chr1	138062861	138175708	112848	-	360	489	441	587	349	281	420	346	356	407	521	516	619	494	614	494	420
ENSMUSG00000026393	protein_coding	Nek7	overlapping_locus	chr1	138482875	138620141	137267	-	2105	2398	2778	2719	2391	2335	2570	2641	2829	2544	2482	2294	2590	2335	2620	2491	2211
ENSMUSG00000079283	protein_coding	2310009B15Rik		chr1	138851983	138856852	4870	-	142	123	133	128	121	115	116	124	148	145	148	108	120	135	145	140	130
ENSMUSG00000056268	protein_coding	Dennd1b	overlapping_locus	chr1	138963435	139178960	215526	+	411	470	422	717	401	352	458	380	427	322	369	411	501	403	398	342	342
ENSMUSG00000033964	protein_coding	Zbtb41		chr1	139422288	139453005	30718	+	713	797	844	913	764	761	906	691	842	745	646	654	773	732	789	752	647
ENSMUSG00000033952	protein_coding	Aspm		chr1	139454772	139494091	39320	+	288	347	403	382	230	221	211	176	266	241	175	252	329	262	217	189	210
ENSMUSG00000026365	protein_coding	Cfh		chr1	140084708	140183764	99057	-	140	193	145	368	156	123	233	175	254	193	193	208	329	265	235	228	221
ENSMUSG00000101795	processed_pseudogene	Gm5835	pseudo_consens	chr1	143093347	143094616	1270	-	47	56	58	52	57	63	70	60	60	49	63	43	45	49	72	57	56
ENSMUSG00000026361	protein_coding	Cdc73		chr1	143598800	143702893	104094	-	883	1152	1239	1208	1132	1027	1224	1011	986	957	1023	1093	1136	963	1080	1007	917
ENSMUSG00000033849	protein_coding	B3galt2		chr1	143640664	143654614	13951	+	142	209	188	312	221	166	295	236	266	297	283	278	413	282	310	300	242
ENSMUSG00000018196	protein_coding	Glrx2		chr1	143716338	143749676	33339	+	858	815	985	913	786	736	835	793	887	889	865	780	823	786	883	857	782
ENSMUSG00000018199	protein_coding	Ro60		chr1	143750790	143777068	26279	-	908	1001	1293	1101	868	893	880	879	994	955	1068	970	1294	919	1284	962	952
ENSMUSG00000018189	protein_coding	Uchl5	overlapping_locus	chr1	143777272	143807466	30195	+	1126	1027	1324	1198	1148	967	1031	1051	961	964	1034	844	988	945	1043	859	824
ENSMUSG00000100455	lncRNA	Gm29170	overlapping_locus	chr1	143777642	143781307	3666	+	67	70	71	74	66	58	78	70	87	70	40	59	81	64	51	63	47
ENSMUSG00000026360	protein_coding	Rgs2		chr1	143999338	144004161	4824	-	318	318	297	392	296	254	374	294	352	310	388	350	324	432	451	343	331
ENSMUSG00000026357	protein_coding	Rgs18		chr1	144752683	144775435	22753	-	148	135	141	174	110	144	188	152	236	172	220	158	153	250	222	174	183
ENSMUSG00000056220	protein_coding	Pla2g4a		chr1	149829618	149961290	131673	-	670	704	1461	810	629	563	768	766	684	679	741	625	838	758	770	801	744
ENSMUSG00000006010	protein_coding	Odr4		chr1	150361305	150393080	31776	-	812	944	954	1111	1059	897	975	922	948	874	913	828	959	864	990	834	848
ENSMUSG00000006005	protein_coding	Tpr		chr1	150392838	150449935	57098	+	1928	2915	3448	3001	2582	2163	2534	2237	2130	2227	2204	2455	3151	2069	2339	2416	2316
ENSMUSG00000006014	protein_coding	Prg4		chr1	150449412	150466165	16754	-	264	385	621	545	271	390	494	343	413	700	563	736	1099	262	356	530	417
ENSMUSG00000066842	protein_coding	Hmcn1		chr1	150562524	150993435	430912	-	185	320	270	374	243	193	255	200	226	224	265	297	420	249	269	282	268
ENSMUSG00000100954	lncRNA	Gm10138		chr1	151339604	151345231	5628	-	48	51	75	57	31	33	50	59	67	46	43	56	55	32	51	35	39
ENSMUSG00000023150	protein_coding	Ivns1abp		chr1	151344477	151364422	19946	+	6516	7038	8552	10433	6374	6301	7622	6933	7723	7395	6602	7498	8074	7798	7835	8484	7369
ENSMUSG00000052748	protein_coding	Swt1		chr1	151367699	151428455	60757	-	289	314	317	361	232	256	313	215	315	296	307	295	317	315	321	318	295
ENSMUSG00000053286	protein_coding	Trmt1l	ncRNA_host	chr1	151428542	151458161	29620	+	252	248	307	324	166	194	217	230	265	252	249	285	312	294	317	300	273
ENSMUSG00000026484	protein_coding	Rnf2		chr1	151458004	151500955	42952	-	883	941	1063	1111	950	971	1045	976	974	964	987	964	1013	930	1027	907	792
ENSMUSG00000026483	protein_coding	Fam129a		chr1	151571186	151721939	150754	+	547	981	774	899	751	627	843	582	669	698	947	883	1114	699	1026	909	899
ENSMUSG00000043019	protein_coding	Edem3		chr1	151755371	151822051	66681	+	1513	1962	2169	1916	1856	1496	1843	1620	1734	1622	1488	1654	2044	1524	1697	1633	1553
ENSMUSG00000032666	protein_coding	1700025G04Rik	ncRNA_host	chr1	151852403	152090125	237723	-	1354	1764	1814	1833	1790	1458	1687	1690	1544	1588	1610	1552	1636	1428	1723	1706	1499
ENSMUSG00000014980	protein_coding	Tsen15		chr1	152370735	152386688	15954	-	102	70	99	124	73	98	88	88	131	113	115	100	93	121	96	121	93
ENSMUSG00000032649	protein_coding	Colgalt2		chr1	152399830	152510695	110866	+	114	190	168	203	107	147	172	170	184	264	291	288	311	154	235	189	194
ENSMUSG00000026482	protein_coding	Rgl1	overlapping_locus	chr1	152516760	152766351	249592	-	325	511	411	726	367	320	442	388	424	430	483	453	664	482	533	501	458
ENSMUSG00000008475	protein_coding	Arpc5		chr1	152766542	152775597	9056	+	3372	3071	3970	3563	3052	2942	3368	3112	3684	3394	3449	3005	3355	3379	3682	3173	2846
ENSMUSG00000026480	protein_coding	Ncf2		chr1	152800194	152836991	36798	+	117	125	110	161	125	100	128	103	116	112	149	128	145	147	143	121	124
ENSMUSG00000042772	protein_coding	Smg7		chr1	152836995	152902646	65652	-	1057	1417	1587	1541	1280	1090	1290	1056	1150	1082	1135	1160	1499	1135	1353	1348	1137
ENSMUSG00000026479	protein_coding	Lamc2		chr1	153122756	153186447	63692	-	1518	2147	3327	1959	1757	1754	1907	1723	1670	1804	1779	2029	2134	1494	1815	1708	1474
ENSMUSG00000026478	protein_coding	Lamc1		chr1	153218922	153332786	113865	-	1361	2639	2599	2521	2022	1635	2217	1719	1582	1948	1781	2015	3200	1681	2322	1994	2046
ENSMUSG00000042699	protein_coding	Dhx9		chr1	153455758	153487660	31903	-	2095	3201	4568	3201	2688	2368	2947	2421	2050	2170	2322	2716	3362	2211	2608	2763	2595
ENSMUSG00000042684	protein_coding	Npl		chr1	153503015	153550045	47031	-	1553	1426	2479	1809	1572	1573	1815	1713	1917	1487	1525	1496	1734	1813	2370	1921	1833
ENSMUSG00000026475	protein_coding	Rgs16		chr1	153740349	153745468	5120	+	59	94	46	61	71	60	76	47	58	51	50	74	66	63	92	74	80
ENSMUSG00000066800	protein_coding	Rnasel		chr1	153749426	153764221	14796	+	195	206	132	341	115	118	170	181	175	159	194	190	305	202	224	196	157
ENSMUSG00000045968	protein_coding	Teddm2		chr1	153849542	153900228	50687	-	55	67	49	84	67	83	66	94	83	76	71	71	74	51	36	55	46
ENSMUSG00000026473	protein_coding	Glul		chr1	153899944	153909723	9780	+	5706	6586	5412	7552	6388	6187	6056	5522	5704	6303	5441	5347	6624	5164	6587	5220	5714
ENSMUSG00000004110	protein_coding	Cacna1e		chr1	154390731	154884501	493771	-	191	303	259	433	206	204	316	245	313	181	282	374	288	358	335	338	332
ENSMUSG00000056708	protein_coding	Ier5		chr1	155096361	155099636	3276	-	628	613	722	612	633	510	641	547	549	554	617	620	795	618	774	613	485
ENSMUSG00000026471	protein_coding	Mr1		chr1	155127277	155146814	19538	-	410	438	492	561	391	346	411	436	470	440	444	502	527	391	525	480	393
ENSMUSG00000026470	protein_coding	Stx6	overlapping_locus	chr1	155158715	155208256	49542	+	1443	1669	1766	1661	1492	1313	1630	1327	1515	1399	1337	1267	1516	1349	1686	1448	1260
ENSMUSG00000033722	protein_coding	BC034090		chr1	155212471	155244444	31974	-	67	80	85	114	72	51	70	77	58	61	73	114	91	103	134	112	81
ENSMUSG00000026469	protein_coding	Xpr1		chr1	155275701	155417415	141715	-	716	1051	1122	1064	947	878	966	822	769	847	877	918	1120	667	970	814	823
ENSMUSG00000033701	protein_coding	Acbd6		chr1	155558120	155691330	133211	+	1922	2183	2446	1980	2470	2320	2412	2382	2455	2510	2177	2295	2092	2564	2712	2210	2372
ENSMUSG00000033684	protein_coding	Qsox1		chr1	155776029	155812889	36861	-	2599	2741	2787	2529	2434	2297	2607	2346	2779	2243	2257	2160	2297	2584	2859	2507	2414
ENSMUSG00000033671	protein_coding	Cep350		chr1	155844964	155973255	128292	-	1094	1728	1947	1903	1386	1170	1458	1118	1293	1244	1403	1427	1795	1191	1442	1510	1241
ENSMUSG00000026466	protein_coding	Tor1aip1		chr1	156004599	156036480	31882	-	1288	1685	1572	1820	1662	1515	1660	1438	1395	1514	1495	1496	1790	1315	1502	1511	1368
ENSMUSG00000050565	protein_coding	Tor1aip2		chr1	156035403	156068861	33459	+	1951	2426	2731	2495	2274	2091	2313	1973	1900	2224	2158	2090	2385	2054	2241	2249	1989
ENSMUSG00000078193	protein_coding	Gm2000		chr1	156366040	156366484	445	+	136	81	93	107	66	79	88	86	118	58	66	33	49	98	97	104	36
ENSMUSG00000026600	protein_coding	Soat1		chr1	156424525	156474331	49807	-	7257	9386	8875	8112	10504	9098	9758	7415	7069	9060	9549	7867	9373	8519	7282	8065	8509
ENSMUSG00000026596	protein_coding	Abl2		chr1	156558786	156649568	90783	+	603	869	1029	900	807	684	829	626	613	691	649	782	837	542	693	715	599
ENSMUSG00000060519	protein_coding	Tor3a		chr1	156653617	156674356	20740	-	551	698	682	596	576	545	614	556	672	595	701	607	728	615	785	642	635
ENSMUSG00000033557	protein_coding	Fam20b		chr1	156678532	156719086	40555	-	2103	2657	2983	2548	2407	2303	2572	2339	2507	2479	2629	2447	2765	2275	3005	2700	2305
ENSMUSG00000026594	protein_coding	Ralgps2	overlapping_locus	chr1	156804166	156939626	135461	-	1302	1543	1884	1666	1459	1216	1425	1267	1298	1314	1360	1257	1451	1218	1385	1303	1207
ENSMUSG00000033544	protein_coding	Angptl1		chr1	156838562	156861078	22517	+	61	111	65	112	96	68	109	108	80	104	145	124	139	91	158	107	118
ENSMUSG00000070565	protein_coding	Rasal2	overlapping_locus	chr1	157135182	157412595	277414	-	733	1092	1153	1154	896	830	972	807	866	761	848	914	1061	806	943	879	852
ENSMUSG00000049881	transcribed_processed_pseudogene	2810025M15Rik	pseudo_consens	chr1	157412352	157420236	7885	+	457	484	464	469	481	432	381	451	481	524	501	390	414	479	492	445	384
ENSMUSG00000033488	protein_coding	Cryzl2		chr1	157458577	157492638	34062	+	89	97	137	146	122	117	108	117	137	92	117	91	98	124	194	126	122
ENSMUSG00000026589	protein_coding	Sec16b		chr1	157506728	157568425	61698	+	78	114	75	191	80	68	90	76	97	65	81	78	132	102	117	99	85
ENSMUSG00000073530	protein_coding	Pappa2	overlapping_locus	chr1	158711727	158980490	268764	-	131	175	185	227	135	142	148	119	202	228	169	211	281	144	236	164	185
ENSMUSG00000040782	protein_coding	Cop1	overlapping_locus	chr1	159232320	159347640	115321	+	586	601	743	673	574	555	601	629	629	556	625	526	623	558	719	561	523
ENSMUSG00000090394	protein_coding	4930523C07Rik		chr1	160044382	160080208	35827	+	374	453	551	503	505	428	509	384	384	558	377	450	456	388	470	469	401
ENSMUSG00000058267	protein_coding	Mrps14		chr1	160195215	160202170	6956	+	873	775	922	796	884	868	919	900	983	859	844	744	710	976	930	924	729
ENSMUSG00000014226	protein_coding	Cacybp		chr1	160202367	160212875	10509	-	1258	1099	1604	1273	1179	1178	1219	1225	1269	1269	1194	1045	1151	1272	1152	1245	1038
ENSMUSG00000026721	protein_coding	Rabgap1l	overlapping_locus	chr1	160219174	160793211	574038	-	947	1104	1216	1198	967	853	1075	851	859	849	974	890	1080	793	1038	946	811
ENSMUSG00000040423	protein_coding	Rc3h1		chr1	160906418	160974978	68561	+	1066	1380	1526	1414	1131	1030	1143	872	1074	1131	1216	1208	1454	1026	1299	1160	1113
ENSMUSG00000043467	protein_coding	Zbtb37		chr1	161002922	161034849	31928	-	253	346	313	494	264	252	349	263	311	270	263	392	396	274	360	407	286
ENSMUSG00000053332	lncRNA	Gas5	ncRNA_host	chr1	161034422	161038539	4118	+	4057	3517	3570	4162	3661	3620	3995	3828	4311	3799	3847	3464	3392	3646	4037	3780	3208
ENSMUSG00000026709	protein_coding	Dars2		chr1	161040601	161070658	30058	-	226	228	355	320	211	221	239	289	248	234	230	237	254	255	297	257	238
ENSMUSG00000026708	protein_coding	Cenpl		chr1	161070713	161086724	16012	+	177	156	198	204	186	163	140	156	191	122	125	130	159	180	157	123	119
ENSMUSG00000026705	protein_coding	Klhl20		chr1	161088375	161131511	43137	-	464	578	608	765	513	501	618	494	591	470	497	553	598	466	499	583	503
ENSMUSG00000026701	protein_coding	Prdx6		chr1	161240112	161251219	11108	-	3688	4205	4532	4239	3995	3732	3964	4014	4316	3974	3721	3585	3926	3739	4738	3907	3490
ENSMUSG00000040297	protein_coding	Suco		chr1	161816114	161876682	60569	-	900	1065	1261	1304	1010	941	1109	890	964	877	1012	1010	1184	1043	1120	1025	895
ENSMUSG00000026698	protein_coding	Pigc	overlapping_locus	chr1	161969186	161973435	4250	+	608	546	665	626	509	517	563	610	659	632	561	548	527	601	651	572	577
ENSMUSG00000040265	protein_coding	Dnm3		chr1	161982453	162478034	495582	-	48	78	46	86	51	44	54	56	56	67	72	72	97	55	74	46	52
ENSMUSG00000078190	lncRNA	Dnm3os	ncRNA_host	chr1	162217623	162225550	7928	+	69	66	89	161	72	55	107	93	75	63	55	68	126	132	107	95	102
ENSMUSG00000026694	protein_coding	Eef1aknmt		chr1	162532127	162548551	16425	-	414	499	552	548	469	382	494	439	415	345	399	435	421	402	496	396	412
ENSMUSG00000026696	protein_coding	Vamp4		chr1	162570515	162599084	28570	+	689	656	844	869	652	706	735	787	917	821	843	739	824	869	981	867	726
ENSMUSG00000026697	protein_coding	Myoc		chr1	162639155	162649693	10539	+	1927	2233	1375	2819	2235	1875	2546	2461	3027	2414	2485	2046	2699	2169	2564	2302	2194
ENSMUSG00000040225	protein_coding	Prrc2c	ncRNA_host	chr1	162670725	162740556	69832	-	1755	3056	3718	3336	2173	2039	2548	1949	1890	1955	2092	2627	3505	1930	2384	2509	2302
ENSMUSG00000040181	protein_coding	Fmo1		chr1	162829561	162866610	37050	-	221	337	193	583	338	261	314	241	313	309	250	282	441	341	388	319	352
ENSMUSG00000040170	protein_coding	Fmo2		chr1	162874317	162898726	24410	-	574	772	751	1291	799	593	691	553	726	671	727	539	1226	520	1123	686	679
ENSMUSG00000026586	protein_coding	Prrx1	overlapping_locus	chr1	163245119	163313710	68592	-	1353	1790	1845	2045	1687	1382	1905	1751	1752	1745	1956	1840	2291	1899	2296	2017	2128
ENSMUSG00000040124	protein_coding	Gorab		chr1	163384908	163403669	18762	-	234	257	300	318	230	303	280	287	359	254	267	271	304	345	322	289	261
ENSMUSG00000026585	protein_coding	Kifap3		chr1	163779583	163917109	137527	+	548	640	719	699	598	563	550	639	567	596	644	653	642	623	701	662	613
ENSMUSG00000026584	protein_coding	Scyl3		chr1	163929100	163955126	26027	+	518	606	678	891	559	585	677	542	559	505	516	607	692	529	590	521	531
ENSMUSG00000041406	protein_coding	BC055324		chr1	163945993	163994796	48804	-	105	115	131	122	87	74	74	106	87	47	71	84	77	112	104	86	86
ENSMUSG00000041396	protein_coding	Mettl18		chr1	163994889	163997243	2355	+	90	87	102	83	98	83	81	79	123	86	86	77	77	103	85	94	89
ENSMUSG00000026582	protein_coding	Sele		chr1	164048234	164057677	9444	+	52	80	52	87	42	63	64	28	52	74	79	70	75	33	52	49	60
ENSMUSG00000026580	protein_coding	Selp		chr1	164115264	164150026	34763	+	45	95	59	112	61	65	69	28	47	54	51	71	71	35	52	28	53
ENSMUSG00000040918	protein_coding	Slc19a2		chr1	164249046	164265385	16340	+	503	472	600	591	588	486	634	405	506	528	499	439	578	517	580	500	459
ENSMUSG00000026578	protein_coding	Ccdc181		chr1	164275585	164287847	12263	+	235	213	279	231	194	201	242	256	267	233	244	205	226	219	302	237	218
ENSMUSG00000026577	protein_coding	Blzf1		chr1	164289800	164307489	17690	-	791	926	1127	974	856	812	930	754	897	832	913	790	1091	795	955	778	758
ENSMUSG00000026575	protein_coding	Nme7		chr1	164304121	164437725	133605	+	165	194	231	194	200	178	167	224	218	167	173	191	178	189	205	154	169
ENSMUSG00000026576	protein_coding	Atp1b1		chr1	164437109	164458355	21247	-	821	1359	1124	1511	1562	1243	1200	1386	1282	1317	1281	1197	1654	1080	839	1536	1039
ENSMUSG00000026574	protein_coding	Dpt		chr1	164796644	164824266	27623	+	1787	2232	1532	3254	2516	1996	2984	2358	3594	2570	2356	1790	3327	3908	3044	3017	2796
ENSMUSG00000040848	protein_coding	Sft2d2		chr1	165174337	165194438	20102	-	2374	3244	3349	3330	2721	2444	2965	2456	2712	2696	2919	2702	3256	2513	3442	2769	2543
ENSMUSG00000040843	protein_coding	Tiprl	overlapping_locus	chr1	165212286	165236996	24711	-	602	628	715	681	646	635	692	669	686	667	661	682	647	627	710	683	693
ENSMUSG00000040836	protein_coding	Gpr161		chr1	165295789	165326745	30957	+	322	485	512	423	427	386	483	379	348	444	472	432	508	327	390	327	358
ENSMUSG00000026571	protein_coding	Dcaf6	overlapping_locus	chr1	165328698	165460475	131778	-	978	1183	1124	1661	1201	1174	1292	1245	1237	1209	1049	1205	1391	1134	1087	1298	1109
ENSMUSG00000026568	protein_coding	Mpc2	overlapping_locus	chr1	165460637	165481214	20578	+	2571	2276	2372	2573	2738	2800	2893	2696	3296	2524	2740	2141	1926	3025	2537	2732	2350
ENSMUSG00000026566	protein_coding	Mpzl1	overlapping_locus	chr1	165592240	165634538	42299	-	618	759	718	739	754	675	788	723	684	744	693	690	774	645	791	668	636
ENSMUSG00000040723	protein_coding	Rcsd1		chr1	165646516	165709757	63242	-	319	431	302	528	441	376	450	441	505	401	417	455	499	408	398	535	395
ENSMUSG00000040713	protein_coding	Creg1		chr1	165763746	165775308	11563	+	2107	2337	2770	2481	2492	2320	2814	2562	3053	2406	2375	2235	2315	2998	2672	2882	2759
ENSMUSG00000005763	protein_coding	Cd247	overlapping_locus	chr1	165788681	165877277	88597	+	154	173	109	166	131	110	132	149	102	165	154	93	140	130	140	123	103
ENSMUSG00000026565	protein_coding	Pou2f1		chr1	165865154	166002678	137525	-	413	639	641	666	536	480	595	432	486	440	551	575	696	426	547	469	421
ENSMUSG00000026564	protein_coding	Dusp27		chr1	166098148	166127922	29775	-	112	210	163	226	274	214	229	186	210	194	195	208	278	117	94	195	116
ENSMUSG00000040612	protein_coding	Ildr2		chr1	166254139	166316823	62685	+	45	101	93	98	118	83	109	87	101	89	89	94	132	77	87	89	98
ENSMUSG00000026563	protein_coding	Tada1		chr1	166379097	166393621	14525	+	200	156	216	203	176	161	204	141	193	180	166	154	162	163	206	165	156
ENSMUSG00000040596	protein_coding	Pogk		chr1	166384622	166409863	25242	-	766	1057	1175	1156	978	811	993	792	830	1048	1003	1035	1147	816	1109	1114	855
ENSMUSG00000060568	protein_coding	Fam78b		chr1	167001417	167091302	89886	+	51	76	83	77	65	73	62	68	53	74	78	67	77	84	81	65	76
ENSMUSG00000026558	protein_coding	Uck2		chr1	167222883	167285320	62438	-	1433	1863	2299	1653	1893	1600	1721	1445	1290	1377	1311	1509	1650	1352	1918	1598	1437
ENSMUSG00000052428	protein_coding	Tmco1		chr1	167308378	167333978	25601	+	1073	880	1210	1111	1018	1076	1134	1060	1251	1005	1115	940	909	1176	1167	1177	975
ENSMUSG00000026687	protein_coding	Aldh9a1		chr1	167349991	167368532	18542	+	1236	1522	1686	1579	1633	1439	1647	1568	1613	1364	1312	1295	1308	1533	1674	1603	1550
ENSMUSG00000026688	protein_coding	Mgst3		chr1	167371966	167393841	21876	-	1575	1463	1418	1590	1585	1667	1711	1720	1890	1551	1577	1364	1349	1839	1566	1675	1439
ENSMUSG00000015843	protein_coding	Rxrg		chr1	167598384	167639623	41240	+	59	82	69	98	102	98	106	100	124	96	91	98	87	94	85	100	77
ENSMUSG00000052534	protein_coding	Pbx1	overlapping_locus	chr1	168119364	168432270	312907	-	1323	2071	2463	1942	2026	1668	1836	1693	1515	1523	1708	1793	1973	1495	1937	1921	1793
ENSMUSG00000026683	protein_coding	Nuf2		chr1	169497934	169531464	33531	-	167	170	200	200	166	164	160	158	197	111	135	107	109	179	163	148	145
ENSMUSG00000026678	protein_coding	Rgs5		chr1	169655501	169695813	40313	+	1915	3017	1905	3163	2777	2303	2459	2510	2734	2289	2077	2177	2462	2535	2294	2554	2538
ENSMUSG00000038530	protein_coding	Rgs4		chr1	169741477	169747642	6166	-	160	253	144	285	285	171	207	205	163	157	156	165	184	216	186	244	238
ENSMUSG00000026675	protein_coding	Hsd17b7		chr1	169949535	169969241	19707	-	5423	6881	6898	4902	7887	5936	7868	6319	7287	7607	5809	8307	8061	8766	10763	8677	9719
ENSMUSG00000026674	protein_coding	Ddr2		chr1	169972307	170110762	138456	-	750	1185	1174	1411	883	762	1151	918	1054	1018	1057	1078	1326	1011	1266	1233	1144
ENSMUSG00000026670	protein_coding	Uap1		chr1	170141938	170174957	33020	-	597	713	779	824	756	686	771	665	695	736	711	685	802	717	764	791	624
ENSMUSG00000026667	protein_coding	Uhmk1		chr1	170193420	170215397	21978	-	1121	1479	1643	1573	1258	1157	1266	1073	1217	1211	1310	1393	1489	1077	1454	1277	1196
ENSMUSG00000102752	protein_coding	Gm7694	overlapping_locus	chr1	170298199	170306332	8134	-	127	204	192	194	158	164	191	164	160	145	108	175	187	149	187	164	148
ENSMUSG00000038463	protein_coding	Olfml2b		chr1	170644532	170682789	38258	+	298	399	287	493	381	288	371	372	376	303	352	338	467	419	518	335	388
ENSMUSG00000026663	protein_coding	Atf6	ncRNA_host	chr1	170704674	170867771	163098	-	987	1356	1561	1189	1160	952	1177	905	878	1001	1061	1019	1402	984	1220	1121	1088
ENSMUSG00000026659	protein_coding	Dusp12		chr1	170873498	170885540	12043	-	270	225	249	287	262	252	297	234	322	224	246	226	187	251	226	214	189
ENSMUSG00000026656	protein_coding	Fcgr2b		chr1	170958617	170976547	17931	-	338	287	272	533	291	256	460	343	292	267	312	378	568	483	463	351	324
ENSMUSG00000059498	protein_coding	Fcgr3	ncRNA_host	chr1	171051174	171064935	13762	-	212	195	184	376	180	165	251	202	260	224	284	246	392	297	295	216	230
ENSMUSG00000058076	protein_coding	Sdhc		chr1	171127165	171150603	23439	-	1861	1939	1873	2141	2218	2224	2184	2223	2442	2211	2074	1800	1716	2253	2142	2249	1976
ENSMUSG00000056569	protein_coding	Mpz		chr1	171150711	171161130	10420	+	3412	6448	4076	5223	7008	5882	5080	7087	4875	5487	5757	5804	6014	5289	6506	5237	6686
ENSMUSG00000038370	protein_coding	Pcp4l1		chr1	171173262	171196268	23007	-	1038	1443	1128	1755	2109	1919	2143	1776	1723	1586	1560	1409	1798	1748	1230	2220	1383
ENSMUSG00000005674	protein_coding	Tomm40l		chr1	171216011	171222514	6504	-	88	97	98	89	101	112	113	109	145	109	99	82	108	134	129	132	109
ENSMUSG00000058715	protein_coding	Fcer1g		chr1	171229572	171234365	4794	-	299	337	252	470	212	192	299	251	254	271	361	331	450	333	324	295	274
ENSMUSG00000013593	protein_coding	Ndufs2		chr1	171234853	171251388	16536	-	3517	3854	4011	4193	4136	4089	4106	4158	4532	4095	3705	3616	3891	3936	3882	4221	3553
ENSMUSG00000052423	protein_coding	B4galt3		chr1	171270328	171276896	6569	+	165	238	248	305	233	208	283	196	230	189	175	244	257	248	249	264	207
ENSMUSG00000062729	protein_coding	Ppox		chr1	171275990	171281186	5197	-	435	412	491	737	381	367	445	430	440	383	361	458	548	584	489	590	465
ENSMUSG00000053483	protein_coding	Usp21		chr1	171281945	171287991	6047	-	406	497	592	557	405	383	466	454	429	422	366	446	502	509	521	498	473
ENSMUSG00000062963	protein_coding	Ufc1		chr1	171288563	171295024	6462	-	1448	1337	1379	1452	1451	1339	1495	1417	1637	1367	1413	1134	1163	1376	1508	1247	1168
ENSMUSG00000013973	protein_coding	Dedd		chr1	171329145	171342331	13187	+	67	85	87	96	81	74	65	81	82	66	71	63	98	66	85	74	74
ENSMUSG00000013997	protein_coding	Nit1		chr1	171338008	171345646	7639	-	426	435	526	588	417	374	450	503	519	458	457	468	500	509	520	506	499
ENSMUSG00000006412	protein_coding	Pfdn2		chr1	171345670	171359254	13585	+	632	627	791	628	679	692	629	684	683	655	642	615	659	635	746	696	581
ENSMUSG00000006411	protein_coding	Nectin4		chr1	171370099	171388598	18500	+	2465	2889	3843	2843	2496	2205	2727	2109	2371	2521	2993	2559	3525	2000	3823	2643	2173
ENSMUSG00000048865	protein_coding	Arhgap30		chr1	171388954	171410298	21345	+	251	348	270	376	183	169	266	178	266	245	260	288	362	286	289	279	278
ENSMUSG00000026641	protein_coding	Usf1	overlapping_locus	chr1	171411313	171419142	7830	+	530	537	563	629	493	534	537	503	600	586	573	493	533	540	661	504	497
ENSMUSG00000038235	protein_coding	F11r		chr1	171437535	171464603	27069	+	1929	1925	2312	2036	1931	1844	1945	2024	2132	2404	2152	2092	2068	1912	2382	2004	1822
ENSMUSG00000060244	protein_coding	Alyref2		chr1	171503478	171504750	1273	+	62	47	62	63	46	57	43	60	74	47	53	43	60	47	53	68	40
ENSMUSG00000004709	protein_coding	Cd244a		chr1	171559193	171609746	50554	+	63	81	85	86	69	64	74	61	81	57	77	89	81	96	77	86	82
ENSMUSG00000015355	protein_coding	Cd48		chr1	171682009	171705258	23250	+	91	87	75	126	73	50	95	101	95	87	106	94	114	132	119	113	103
ENSMUSG00000038147	protein_coding	Cd84		chr1	171839697	171890718	51022	+	118	139	128	188	94	74	134	97	143	154	185	170	172	178	168	138	92
ENSMUSG00000026556	protein_coding	Vangl2		chr1	172000960	172028444	27485	-	828	1011	1165	1072	792	747	844	802	702	890	855	953	1069	631	1035	833	751
ENSMUSG00000003458	protein_coding	Ncstn		chr1	172066013	172082795	16783	-	1994	2537	2656	2712	2306	1950	2356	2031	2075	1981	2023	1978	2517	1907	2456	1982	1876
ENSMUSG00000026553	protein_coding	Copa		chr1	172082529	172122330	39802	+	2886	3956	5117	4161	3475	2850	3538	3111	3105	2942	3168	3264	4188	3127	3906	3563	3341
ENSMUSG00000003464	protein_coding	Pex19		chr1	172126755	172136493	9739	+	3432	3877	3676	4046	4016	3585	3969	3938	4007	3792	3620	3356	3475	3466	3647	3531	3287
ENSMUSG00000026554	protein_coding	Dcaf8		chr1	172148084	172197005	48922	+	2431	3189	3105	3540	2797	2869	3152	2963	2961	2990	2717	2828	3272	2729	3081	2918	2634
ENSMUSG00000013698	protein_coding	Pea15a		chr1	172196728	172206804	10077	-	2323	2870	2729	2679	2686	2362	2702	2659	2972	2400	2573	2436	2633	2903	3253	3175	2761
ENSMUSG00000007122	protein_coding	Casq1		chr1	172209894	172219868	9975	-	2045	2402	1812	2952	2734	2814	2417	3194	3391	2133	2107	2031	2065	2116	1504	2950	1738
ENSMUSG00000038034	protein_coding	Igsf8		chr1	172261641	172319841	58201	+	1099	1424	1564	1212	1259	1187	1393	1322	1160	1280	1111	1185	1392	1081	1379	1205	1152
ENSMUSG00000007097	protein_coding	Atp1a2		chr1	172271709	172298064	26356	-	4299	6819	4912	8464	7773	7042	6682	7105	7005	6986	6456	6525	7633	4762	4382	7203	4679
ENSMUSG00000050229	protein_coding	Pigm		chr1	172376546	172384099	7554	+	579	693	761	790	673	664	683	574	605	567	587	611	669	591	657	638	606
ENSMUSG00000037995	protein_coding	Igsf9		chr1	172481788	172498878	17091	+	511	600	778	544	418	434	510	457	458	482	576	557	691	475	659	558	513
ENSMUSG00000026547	protein_coding	Tagln2		chr1	172500047	172507380	7334	+	2971	3708	6170	2784	3234	2906	3474	2542	2160	3104	2725	2535	3575	2944	3075	2952	2667
ENSMUSG00000049598	protein_coding	Vsig8		chr1	172555938	172563717	7780	+	476	571	430	116	465	382	242	120	316	475	941	481	746	244	332	264	225
ENSMUSG00000026544	protein_coding	Dusp23		chr1	172630764	172632962	2199	-	50	80	61	83	63	68	71	80	78	63	75	72	81	55	82	70	63
ENSMUSG00000037872	protein_coding	Ackr1	overlapping_locus	chr1	173331886	173333750	1865	-	212	343	241	361	236	182	217	195	199	272	242	248	367	202	197	173	213
ENSMUSG00000005338	protein_coding	Cadm3	overlapping_locus	chr1	173333258	173367695	34438	-	428	749	645	984	618	521	733	571	678	548	574	619	1018	666	736	688	721
ENSMUSG00000037860	protein_coding	Aim2		chr1	173350879	173466040	115162	+	75	51	43	133	49	40	64	56	71	47	58	67	73	53	51	51	44
ENSMUSG00000073490	protein_coding	Ifi207		chr1	173723427	173741747	18321	-	77	92	85	166	66	58	82	47	67	95	68	112	179	87	64	63	77
ENSMUSG00000073489	protein_coding	Ifi204		chr1	173747293	173766943	19651	-	47	76	71	83	18	27	37	18	40	56	65	66	72	51	24	35	40
ENSMUSG00000090272	protein_coding	Mndal		chr1	173849126	173880881	31756	-	96	100	53	131	42	32	44	39	68	73	107	101	104	82	78	72	76
ENSMUSG00000039997	protein_coding	Ifi203		chr1	173920407	173942672	22266	-	193	225	121	249	81	80	99	111	117	148	202	186	180	123	123	146	104
ENSMUSG00000026535	protein_coding	Ifi202b		chr1	173962568	173982744	20177	-	260	220	296	312	173	163	219	181	258	276	269	224	352	224	218	217	211
ENSMUSG00000026526	protein_coding	Fh1		chr1	175600374	175625635	25262	-	1570	1701	1748	1760	1681	1699	1644	1676	1879	1738	1515	1510	1524	1828	1672	1860	1650
ENSMUSG00000078185	protein_coding	Chml	overlapping_locus	chr1	175682237	175692901	10665	-	362	428	566	522	371	321	404	392	396	412	409	396	490	353	441	401	415
ENSMUSG00000057335	protein_coding	Cep170	ncRNA_host	chr1	176733653	176814067	80415	-	223	329	236	382	266	221	288	221	245	272	266	316	335	271	318	298	288
ENSMUSG00000026504	protein_coding	Sdccag8	overlapping_locus	chr1	176814660	177020437	205778	+	138	134	152	180	152	125	143	165	154	140	157	171	155	161	205	175	152
ENSMUSG00000019699	protein_coding	Akt3		chr1	177020073	177258203	238131	-	194	303	252	365	227	222	262	209	286	284	359	316	329	235	294	283	228
ENSMUSG00000063659	protein_coding	Zbtb18		chr1	177442351	177450764	8414	+	576	721	610	787	645	675	722	642	674	612	563	659	705	643	593	681	540
ENSMUSG00000015961	protein_coding	Adss		chr1	177762962	177796511	33550	-	1418	1482	1935	1762	1474	1435	1660	1418	1534	1496	1357	1363	1489	1523	1560	1378	1270
ENSMUSG00000026502	protein_coding	Desi2		chr1	178187417	178257301	69885	+	718	742	967	908	893	730	865	744	727	820	726	655	900	705	786	748	671
ENSMUSG00000039630	protein_coding	Hnrnpu	overlapping_locus	chr1	178321108	178337797	16690	-	6133	7642	9955	8443	6598	6041	6819	6565	6180	6722	6476	7418	8663	6400	7108	7319	6841
ENSMUSG00000026495	protein_coding	Efcab2		chr1	178406085	178484513	78429	+	110	115	101	149	150	131	135	130	122	130	152	109	130	101	130	147	104
ENSMUSG00000026494	protein_coding	Kif26b	ncRNA_host	chr1	178529125	178939200	410076	+	160	201	225	158	161	135	142	125	125	113	139	159	191	122	223	174	162
ENSMUSG00000055067	protein_coding	Smyd3		chr1	178951960	179518041	566082	-	220	356	267	306	300	299	320	288	271	301	284	296	297	283	342	315	229
ENSMUSG00000026492	protein_coding	Tfb2m		chr1	179528055	179546267	18213	-	113	120	152	100	117	118	136	128	132	114	108	99	124	122	108	126	93
ENSMUSG00000038949	protein_coding	Cnst		chr1	179546370	179627478	81109	+	1127	1635	1347	1729	1357	1236	1467	1270	1351	1342	1374	1526	1751	1161	1446	1406	1273
ENSMUSG00000038936	protein_coding	Sccpdh		chr1	179668210	179687189	18980	+	1444	1701	1424	1795	2047	1684	1796	1564	1477	1605	1746	1474	1472	1493	1370	1251	1035
ENSMUSG00000026491	protein_coding	Ahctf1	overlapping_locus	chr1	179744894	179803680	58787	-	1219	1615	1924	1732	1426	1220	1467	1185	1170	1330	1232	1377	1602	1184	1425	1456	1242
ENSMUSG00000026490	protein_coding	Cdc42bpa		chr1	179960472	180165603	205132	+	840	1582	1384	1603	1331	1156	1391	1130	1076	1115	1317	1337	1669	925	1347	1249	1160
ENSMUSG00000026489	protein_coding	Coq8a		chr1	180165238	180199602	34365	-	2797	4301	3252	4789	4793	4332	3919	4512	4178	3878	3617	3517	4188	3511	2739	4411	3222
ENSMUSG00000010609	protein_coding	Psen2		chr1	180227004	180263438	36435	-	207	219	243	366	261	204	232	236	216	201	211	254	296	236	274	243	250
ENSMUSG00000038855	protein_coding	Itpkb		chr1	180330485	180424802	94318	+	1423	2088	2526	2213	1581	1441	1759	1530	1695	1922	2038	1988	2735	1570	2710	2136	1802
ENSMUSG00000026496	protein_coding	Parp1	ncRNA_host	chr1	180568924	180601254	32331	+	589	774	1200	804	634	667	690	718	654	679	644	703	755	748	877	826	797
ENSMUSG00000058729	protein_coding	Lin9		chr1	180641150	180690694	49545	+	170	176	210	201	144	139	170	156	193	136	131	117	217	152	195	141	145
ENSMUSG00000026499	protein_coding	Acbd3		chr1	180726043	180754204	28162	+	831	914	1220	1045	887	781	949	818	838	913	975	903	1121	877	1166	983	925
ENSMUSG00000060743	protein_coding	H3f3a		chr1	180800832	180813943	13112	-	144	157	150	160	151	142	163	155	195	136	149	136	132	168	134	175	127
ENSMUSG00000038806	protein_coding	Sde2		chr1	180851127	180868113	16987	+	538	743	780	785	655	618	759	636	645	639	654	573	771	576	760	634	582
ENSMUSG00000026520	protein_coding	Pycr2		chr1	180904293	180908088	3796	+	552	532	713	525	527	562	615	491	523	563	491	555	559	584	603	581	521
ENSMUSG00000038793	protein_coding	Lefty1		chr1	180935022	180938400	3379	+	180	185	184	188	167	180	210	193	203	229	226	194	184	199	259	221	171
ENSMUSG00000026519	protein_coding	Tmem63a		chr1	180942344	180975112	32769	+	1797	2422	2338	2558	2170	1929	2239	2070	2077	1984	2008	2140	2313	1965	2452	2195	1859
ENSMUSG00000038776	protein_coding	Ephx1	overlapping_locus	chr1	180976210	181020904	44695	-	992	1443	1169	1550	1266	1186	1456	1424	1415	1468	1372	1478	1630	1423	1766	1760	1510
ENSMUSG00000026516	protein_coding	Nvl		chr1	181087138	181144204	57067	-	672	813	1072	995	711	659	752	700	688	671	636	704	879	715	749	760	703
ENSMUSG00000062169	protein_coding	Cnih4		chr1	181144693	181168994	24302	+	906	919	1067	1053	985	855	938	892	1068	1034	1003	855	955	965	972	996	882
ENSMUSG00000038733	protein_coding	Wdr26		chr1	181173228	181212001	38774	-	3989	5082	5346	5888	4614	4027	4763	3863	4334	4191	4587	4425	5854	3666	4849	4145	3805
ENSMUSG00000004880	protein_coding	Lbr	ncRNA_host	chr1	181815335	181843046	27712	-	946	988	1075	1122	948	821	973	925	1101	872	769	843	1038	973	997	904	980
ENSMUSG00000022995	protein_coding	Enah		chr1	181896384	182019990	123607	-	1369	1786	2099	1770	1686	1470	1656	1374	1315	1363	1395	1431	1697	1391	1498	1643	1253
ENSMUSG00000026511	protein_coding	Srp9		chr1	182124737	182132407	7671	+	277	256	328	256	305	279	305	300	349	258	259	260	231	295	317	340	273
ENSMUSG00000038633	protein_coding	Degs1		chr1	182275772	182282804	7033	-	5804	5535	7736	5972	5926	5493	5993	5599	5826	5751	5670	4617	5345	5135	5291	5324	4900
ENSMUSG00000047539	protein_coding	Fbxo28		chr1	182313102	182341629	28528	-	1159	1394	1652	1417	1308	1141	1356	1059	1109	1188	1198	1164	1278	1007	1250	1056	1045
ENSMUSG00000026510	protein_coding	Trp53bp2		chr1	182409172	182462432	53261	+	994	1374	1628	1471	1135	1024	1189	1095	1067	1118	1233	1242	1562	1039	1259	1231	1171
ENSMUSG00000026509	protein_coding	Capn2		chr1	182467260	182517608	50349	-	1195	1681	2291	1547	1368	1333	1449	1304	1210	1380	1438	1513	1820	1425	1603	1437	1475
ENSMUSG00000038576	protein_coding	Susd4		chr1	182763860	182896591	132732	+	117	204	129	209	181	167	175	171	169	92	86	108	125	149	183	134	165
ENSMUSG00000079164	protein_coding	Tlr5		chr1	182954788	182976044	21257	+	158	267	328	303	287	261	234	253	273	179	222	220	296	246	315	306	297
ENSMUSG00000030768	protein_coding	Disp1	overlapping_locus	chr1	183086266	183221522	135257	-	370	670	610	695	519	485	557	546	474	520	580	600	718	488	584	571	563
ENSMUSG00000046836	protein_coding	Brox		chr1	183276352	183297269	20918	-	621	650	792	775	645	648	704	633	628	582	542	583	672	629	684	592	573
ENSMUSG00000042901	protein_coding	Aida		chr1	183296590	183325476	28887	+	585	593	666	647	559	468	570	515	535	506	570	516	571	589	560	518	535
ENSMUSG00000056050	protein_coding	Mia3	fragmented_locus	chr1	183326725	183369553	42829	-	1372	1812	1829	2058	1723	1462	1699	1508	1511	1388	1424	1482	1853	1412	1608	1571	1409
ENSMUSG00000072258	protein_coding	Taf1a	fragmented_locus	chr1	183388981	183410198	21218	+	267	303	334	403	261	273	346	262	288	307	280	293	315	306	302	297	256
ENSMUSG00000039384	protein_coding	Dusp10		chr1	184013302	184075636	62335	+	169	231	200	240	168	187	164	192	181	242	192	221	274	185	172	251	200
ENSMUSG00000039377	protein_coding	Hlx		chr1	184727140	184732619	5480	-	101	175	161	143	118	98	161	133	140	120	129	133	161	131	133	131	117
ENSMUSG00000073481	protein_coding	Marc2	ncRNA_host	chr1	184813068	184846451	33384	-	2018	2072	1985	2056	2156	2166	2217	2192	2257	2204	2001	1899	1914	2138	2305	2043	1880
ENSMUSG00000039349	protein_coding	C130074G19Rik		chr1	184871926	184883218	11293	-	1012	1541	1092	1218	1389	1193	1397	1279	1314	1237	1410	1238	1309	1100	1365	1331	1252
ENSMUSG00000026620	protein_coding	Mark1		chr1	184896789	184999570	102782	-	382	510	467	399	373	302	421	386	369	342	372	353	444	297	434	331	339
ENSMUSG00000039318	protein_coding	Rab3gap2	ncRNA_host	chr1	185204117	185286759	82643	+	852	1082	1293	1158	903	795	957	761	839	838	853	884	1211	811	974	910	850
ENSMUSG00000026618	protein_coding	Iars2		chr1	185284726	185329396	44671	-	1439	1921	2169	1979	1919	1632	1829	1746	1632	1634	1654	1572	1905	1508	1812	1676	1548
ENSMUSG00000026617	protein_coding	Bpnt1		chr1	185332149	185357777	25629	+	383	498	646	538	455	487	479	449	473	413	438	455	524	463	479	423	398
ENSMUSG00000026615	protein_coding	Eprs		chr1	185363044	185428360	65317	+	1745	2483	3676	2384	2381	2019	2231	2019	1753	1787	2019	2083	2523	1849	2282	2279	2092
ENSMUSG00000039246	protein_coding	Lyplal1		chr1	186087731	186117310	29580	-	200	175	206	221	222	183	207	249	249	215	193	191	205	236	287	222	174
ENSMUSG00000039239	protein_coding	Tgfb2		chr1	186622792	186705989	83198	-	505	712	674	749	580	521	635	668	511	606	696	749	747	513	689	570	619
ENSMUSG00000001305	protein_coding	Rrp15		chr1	186720978	186749358	28381	-	393	472	606	460	426	398	454	406	453	411	405	354	421	376	392	371	357
ENSMUSG00000039210	protein_coding	Gpatch2		chr1	187215508	187351704	136197	+	378	433	437	535	377	361	438	347	371	379	310	411	487	362	464	441	356
ENSMUSG00000104394	TEC	Gm37254		chr1	187236457	187240357	3901	+	50	67	61	73	68	45	64	39	48	50	64	61	74	53	67	52	51
ENSMUSG00000026610	protein_coding	Esrrg		chr1	187608791	188214885	606095	+	83	125	89	147	163	119	110	112	107	121	105	91	125	100	73	161	90
ENSMUSG00000026608	protein_coding	Kctd3		chr1	188971095	189007841	36747	-	689	829	933	968	780	744	928	756	784	736	713	730	870	695	768	793	733
ENSMUSG00000037624	protein_coding	Kcnk2	overlapping_locus	chr1	189207930	189402273	194344	-	242	307	313	388	356	310	326	299	300	271	294	390	322	274	401	333	291
ENSMUSG00000026605	protein_coding	Cenpf		chr1	189640606	189688086	47481	-	494	695	709	655	511	544	383	402	414	383	442	507	552	456	461	325	367
ENSMUSG00000026604	protein_coding	Ptpn14	overlapping_locus	chr1	189728268	189876695	148428	+	2454	4378	4151	4413	2890	2949	3471	3131	3203	3856	3934	4398	4874	2595	3957	3551	3493
ENSMUSG00000104435	lncRNA	Gm37422		chr1	189879935	189884652	4718	+	68	72	63	108	74	66	100	70	45	41	49	59	96	69	54	60	49
ENSMUSG00000026603	protein_coding	Smyd2		chr1	189880492	189922363	41872	-	323	374	507	425	365	347	393	382	411	360	321	346	370	381	319	316	316
ENSMUSG00000010175	protein_coding	Prox1		chr1	190118035	190170714	52680	-	81	97	73	102	81	61	118	90	104	98	73	62	148	96	110	114	109
ENSMUSG00000089872	protein_coding	Rps6kc1		chr1	190700202	190911770	211569	-	233	360	374	341	280	257	322	309	277	292	304	301	369	248	365	297	305
ENSMUSG00000026634	protein_coding	Angel2		chr1	190925112	190946962	21851	+	929	1046	1223	1483	976	921	1078	1002	1139	1004	994	1079	1231	1056	1189	1129	1092
ENSMUSG00000066595	protein_coding	Flvcr1		chr1	191005847	191026158	20312	-	216	273	324	330	281	306	271	263	234	220	196	208	273	235	250	201	206
ENSMUSG00000026632	protein_coding	Tatdn3		chr1	191045826	191062932	17107	-	104	126	133	161	111	107	163	136	174	110	141	117	114	118	163	138	116
ENSMUSG00000062510	protein_coding	Nsl1		chr1	191063012	191086474	23463	+	79	68	77	69	60	60	62	53	69	39	33	38	47	56	75	46	46
ENSMUSG00000026628	protein_coding	Atf3		chr1	191170296	191218039	47744	-	90	146	124	157	316	423	452	60	89	491	170	200	114	76	251	90	101
ENSMUSG00000073478	lncRNA	D730003I15Rik		chr1	191224454	191226140	1687	+	51	41	33	65	52	44	47	46	74	68	55	56	33	56	54	54	46
ENSMUSG00000037499	protein_coding	Nenf		chr1	191306789	191318194	11406	-	927	872	726	862	831	1000	1095	999	1261	901	1020	781	736	1037	1039	945	797
ENSMUSG00000026627	protein_coding	Pacc1		chr1	191325912	191350914	25003	+	59	74	74	83	58	70	66	71	73	83	69	70	92	85	102	75	74
ENSMUSG00000026626	protein_coding	Ppp2r5a		chr1	191351975	191403272	51298	-	1665	2011	2071	2358	1937	1831	2075	1790	1916	1843	1928	1840	2244	1736	2172	1866	1773
ENSMUSG00000037474	protein_coding	Dtl		chr1	191537356	191575544	38189	-	250	267	371	312	265	209	192	217	244	161	144	155	194	270	252	211	225
ENSMUSG00000037461	protein_coding	Ints7		chr1	191575636	191623688	48053	+	357	419	604	448	362	342	378	307	280	272	264	278	342	324	425	348	340
ENSMUSG00000026623	protein_coding	Lpgat1		chr1	191717834	191784255	66422	+	516	756	551	1011	727	640	812	629	672	684	702	691	1159	601	854	780	668
ENSMUSG00000026622	protein_coding	Nek2		chr1	191821444	191833050	11607	+	170	201	209	210	182	191	138	159	161	160	131	144	185	168	171	131	134
ENSMUSG00000037434	protein_coding	Slc30a1		chr1	191906767	191913247	6481	+	1299	1388	1446	1427	1367	1177	1337	1019	1094	1261	1401	1212	1690	1055	1512	1165	1148
ENSMUSG00000026637	protein_coding	Traf5	fragmented_locus	chr1	191997205	192092559	95355	-	157	191	178	206	142	121	153	155	213	212	193	173	240	236	217	208	171
ENSMUSG00000037395	protein_coding	Rcor3		chr1	192098546	192138062	39517	-	437	563	617	668	491	471	525	532	522	520	509	556	680	532	608	561	503
ENSMUSG00000097316	lncRNA	Gm10516		chr1	192136896	192151026	14131	+	71	56	55	85	62	69	73	68	72	62	58	61	36	73	67	65	48
ENSMUSG00000058248	protein_coding	Kcnh1		chr1	192190774	192510159	319386	+	216	374	598	326	322	359	375	338	236	284	299	399	286	239	341	301	302
ENSMUSG00000037375	protein_coding	Hhat		chr1	192496711	192771223	274513	-	58	78	91	84	89	98	92	101	92	64	82	84	72	70	92	74	65
ENSMUSG00000016262	protein_coding	Sertad4		chr1	192844488	192855756	11269	-	1179	1778	1760	1809	1563	1624	1599	1942	1549	1716	1665	1705	1774	1453	1782	1713	1615
ENSMUSG00000016181	protein_coding	Utp25		chr1	193091104	193130272	39169	-	266	332	408	366	338	295	370	252	299	301	265	269	370	338	321	316	280
ENSMUSG00000026638	protein_coding	Irf6	overlapping_locus	chr1	193153111	193172023	18913	+	3143	3487	4847	3349	3452	3055	3349	3183	3000	3779	3417	3641	3909	3045	3993	3692	3198
ENSMUSG00000079144	protein_coding	A130010J15Rik	overlapping_locus	chr1	193168046	193177832	9787	+	257	222	287	259	241	234	250	211	256	232	209	221	217	221	245	239	222
ENSMUSG00000026639	protein_coding	Lamb3	overlapping_locus	chr1	193207699	193343878	136180	+	3228	4865	4713	4303	4253	4043	4107	4012	3445	4781	4220	4676	4898	3230	4060	3933	3476
ENSMUSG00000016194	protein_coding	Hsd11b1	overlapping_locus	chr1	193221634	193264075	42442	-	282	361	270	499	277	298	318	341	419	388	398	342	377	312	386	318	307
ENSMUSG00000009633	protein_coding	G0s2		chr1	193272161	193273217	1057	-	488	511	354	572	494	492	541	658	706	671	682	645	748	627	891	647	574
ENSMUSG00000097850	lncRNA	Mir205hg	ncRNA_host	chr1	193507238	193510174	2937	-	266	210	262	297	136	160	172	254	282	210	174	252	264	248	261	267	206
ENSMUSG00000026640	protein_coding	Plxna2	overlapping_locus	chr1	194618218	194816869	198652	+	884	1274	1620	1254	1078	866	1092	857	834	875	959	997	1211	835	1126	1168	1036
ENSMUSG00000016494	protein_coding	Cd34		chr1	194938819	194961279	22461	+	1255	1795	1021	2240	1532	1224	1780	1612	1855	1706	1586	1456	2126	1851	1740	1823	1772
ENSMUSG00000016493	protein_coding	Cd46	overlapping_locus	chr1	195036826	195092249	55424	-	42	81	41	138	51	59	83	56	68	56	63	81	82	72	63	47	42
ENSMUSG00000016481	protein_coding	Cr1l		chr1	195097382	195131586	34205	-	1077	1119	1418	1334	1049	1010	1194	1135	1246	1150	1191	1056	1284	1219	1223	1180	1051
ENSMUSG00000050530	protein_coding	Fam171a1		chr2	3114224	3227806	113583	+	162	234	162	234	239	165	194	193	198	192	211	197	266	202	225	180	215
ENSMUSG00000026643	protein_coding	Nmt2		chr2	3284212	3328877	44666	+	889	961	1044	1237	962	803	1047	847	889	799	805	854	967	943	1028	982	874
ENSMUSG00000049950	protein_coding	Rpp38		chr2	3328949	3332643	3695	-	197	159	244	216	193	192	172	185	223	206	194	179	164	205	189	204	179
ENSMUSG00000026648	protein_coding	Dclre1c		chr2	3424131	3464130	40000	+	229	212	266	383	186	198	249	194	221	193	244	267	322	250	251	251	212
ENSMUSG00000026646	protein_coding	Suv39h2		chr2	3455815	3475031	19217	-	104	109	148	149	111	109	164	107	113	94	89	104	121	113	111	89	88
ENSMUSG00000109865	protein_coding	Hspa14	overlapping_locus	chr2	3488850	3512814	23965	-	692	715	840	784	706	710	759	623	721	696	630	598	647	786	770	717	617
ENSMUSG00000051396	protein_coding	Gm45902	overlapping_locus	chr2	3504527	3512790	8264	-	139	127	173	139	120	99	117	108	143	110	150	99	124	85	108	80	84
ENSMUSG00000039496	protein_coding	Cdnf		chr2	3513030	3526376	13347	+	154	203	202	248	234	216	232	231	233	239	229	194	218	242	182	260	192
ENSMUSG00000026655	protein_coding	Fam107b		chr2	3570488	3782142	211655	+	1047	1305	1386	1313	1255	1077	1273	1099	1279	1210	1302	1265	1413	1064	1412	1170	1126
ENSMUSG00000026657	protein_coding	Frmd4a	overlapping_locus	chr2	4017717	4614043	596327	+	514	708	784	691	642	552	669	520	506	537	577	622	803	533	665	522	637
ENSMUSG00000039449	protein_coding	Prpf18		chr2	4622058	4652113	30056	-	930	1131	1211	1265	1233	1043	1200	986	1167	1026	970	1001	1109	984	1065	954	905
ENSMUSG00000048186	protein_coding	Bend7		chr2	4717831	4802142	84312	+	99	122	114	129	130	107	105	123	106	97	105	98	110	112	83	112	92
ENSMUSG00000026662	protein_coding	Sephs1		chr2	4881564	4910557	28994	+	1078	1172	1382	1275	1116	1148	1242	1136	1196	1061	1057	1119	1169	1102	1314	1112	949
ENSMUSG00000026664	protein_coding	Phyh		chr2	4919019	4938730	19712	+	1785	1919	1957	2425	2260	2271	2407	2236	2645	2475	2297	2296	2294	2476	2631	2607	2109
ENSMUSG00000026668	protein_coding	Ucma		chr2	4976122	4985748	9627	+	105	109	113	153	93	107	104	193	272	265	203	157	127	157	313	177	148
ENSMUSG00000026669	protein_coding	Mcm10		chr2	4989714	5012791	23078	-	108	114	168	159	91	79	99	75	99	43	41	58	68	118	100	86	57
ENSMUSG00000026672	protein_coding	Optn		chr2	5020642	5064051	43410	-	347	423	359	585	509	418	459	501	510	500	461	457	542	423	427	477	374
ENSMUSG00000026676	protein_coding	Ccdc3	overlapping_locus	chr2	5137776	5230878	93103	+	233	255	322	248	280	247	344	281	246	228	194	173	219	270	318	275	250
ENSMUSG00000039145	protein_coding	Camk1d		chr2	5293457	5714515	421059	-	971	1523	1634	1535	1219	1076	1385	1073	1124	1003	1334	1226	1597	936	1362	1070	1010
ENSMUSG00000039128	protein_coding	Cdc123		chr2	5794294	5845164	50871	-	1640	1563	1927	1696	1690	1577	1720	1601	1786	1493	1539	1443	1493	1646	1796	1667	1433
ENSMUSG00000025817	protein_coding	Nudt5		chr2	5845019	5871895	26877	+	519	529	755	589	515	457	500	523	583	468	507	513	470	575	663	618	508
ENSMUSG00000025816	protein_coding	Sec61a2		chr2	5870987	5895432	24446	-	226	238	276	407	224	222	307	261	279	180	181	236	292	267	219	255	227
ENSMUSG00000025815	protein_coding	Dhtkd1		chr2	5896115	5942792	46678	-	53	111	65	108	93	68	76	62	87	69	84	90	122	96	79	56	89
ENSMUSG00000043241	protein_coding	Upf2		chr2	5951469	6056703	105235	+	912	1212	1284	1350	1086	956	1169	982	1026	986	1159	1082	1250	996	1284	1101	963
ENSMUSG00000045319	protein_coding	Proser2		chr2	6097607	6130211	32605	-	193	232	275	191	220	185	208	185	188	229	266	253	260	182	303	239	210
ENSMUSG00000039063	protein_coding	Echdc3		chr2	6188465	6213033	24569	-	145	162	169	200	154	150	167	157	191	170	168	151	203	172	185	165	155
ENSMUSG00000039046	protein_coding	Usp6nl		chr2	6322667	6446390	123724	+	1246	1689	1601	1629	1481	1334	1544	1128	1220	1242	1435	1365	1726	1061	1549	1332	1216
ENSMUSG00000002107	protein_coding	Celf2	overlapping_locus	chr2	6539694	7509563	969870	-	611	906	731	1117	794	744	922	780	758	792	756	834	1104	771	931	805	733
ENSMUSG00000079604	lncRNA	Gm13219		chr2	9352431	9447676	95246	+	546	497	317	535	450	438	373	433	505	411	372	391	347	418	319	324	331
ENSMUSG00000015619	protein_coding	Gata3	overlapping_locus	chr2	9857078	9890034	32957	-	3038	3792	4814	3891	2755	2632	3016	2816	3141	2918	3181	3359	3795	2752	3647	3153	2832
ENSMUSG00000025782	protein_coding	Taf3		chr2	9914552	10048596	134045	-	301	420	393	382	328	307	360	340	310	297	288	308	388	279	364	313	281
ENSMUSG00000025781	protein_coding	Atp5c1	ncRNA_host	chr2	10056016	10080510	24495	-	5292	5057	5392	5801	5985	5902	5861	6151	6925	5741	5728	5015	5014	6055	5700	6038	5064
ENSMUSG00000037262	protein_coding	Kin		chr2	10080593	10092806	12214	+	248	281	271	350	280	219	280	238	267	214	241	254	244	232	258	230	212
ENSMUSG00000025780	protein_coding	Itih5		chr2	10153571	10256529	102959	+	831	1408	1046	1566	1291	947	1280	1032	900	1048	1249	954	1693	1001	1424	1093	1259
ENSMUSG00000026778	protein_coding	Prkcq	overlapping_locus	chr2	11172108	11301222	129115	+	270	327	285	503	389	327	329	369	411	324	313	320	333	256	227	343	227
ENSMUSG00000026773	protein_coding	Pfkfb3	overlapping_locus	chr2	11471433	11554077	82645	-	354	585	273	790	458	349	515	311	383	431	639	541	740	275	357	389	338
ENSMUSG00000037197	protein_coding	Rbm17		chr2	11585437	11604153	18717	-	893	1140	1256	1216	1163	1070	1041	1027	1001	1029	903	1038	1145	922	1151	997	911
ENSMUSG00000023206	protein_coding	Il15ra		chr2	11705290	11734317	29028	+	368	397	479	620	348	353	474	356	492	369	377	431	484	451	446	449	375
ENSMUSG00000058594	protein_coding	Fbh1		chr2	11742573	11777582	35010	-	682	874	866	1026	693	742	852	790	855	873	868	831	963	887	951	925	827
ENSMUSG00000047909	protein_coding	Ankrd16		chr2	11777876	11790329	12454	+	684	704	655	1354	597	635	821	614	765	611	607	818	966	865	730	799	702
ENSMUSG00000026768	protein_coding	Itga8	overlapping_locus	chr2	12106632	12301922	195291	-	81	151	139	175	137	125	158	130	139	132	141	146	144	145	225	128	159
ENSMUSG00000026767	protein_coding	Mindy3	overlapping_locus	chr2	12347263	12419470	72208	-	940	832	1293	996	761	774	957	832	1032	901	881	784	1167	910	1026	908	747
ENSMUSG00000026730	protein_coding	Pter		chr2	12924041	13003455	79415	+	292	335	429	445	314	328	335	329	367	319	332	326	371	317	371	310	298
ENSMUSG00000026727	protein_coding	Rsu1	overlapping_locus	chr2	13076821	13271415	194595	-	489	734	746	765	739	691	716	699	586	686	624	752	769	708	847	722	793
ENSMUSG00000026726	protein_coding	Cubn		chr2	13276338	13491813	215476	-	97	119	84	138	84	82	89	95	97	115	109	118	117	86	129	97	97
ENSMUSG00000026723	protein_coding	Trdmt1		chr2	13509014	13544668	35655	-	161	193	197	215	187	166	212	192	174	190	182	153	197	194	232	208	183
ENSMUSG00000026728	protein_coding	Vim		chr2	13573927	13582826	8900	+	11033	16505	14503	15598	13520	12181	14396	12625	12069	13100	12803	12907	16645	13251	15425	12896	13149
ENSMUSG00000003418	protein_coding	St8sia6		chr2	13651021	13794064	143044	-	203	346	308	319	397	304	348	281	298	305	321	318	337	281	265	287	273
ENSMUSG00000063275	protein_coding	Hacd1	overlapping_locus	chr2	13850282	14056135	205854	-	54	63	59	71	64	59	58	80	65	49	60	75	53	66	46	56	53
ENSMUSG00000026718	protein_coding	Stam		chr2	14074098	14149634	75537	+	473	494	560	645	475	449	551	420	501	497	439	491	567	453	529	518	437
ENSMUSG00000026712	protein_coding	Mrc1	ncRNA_host	chr2	14229392	14332057	102666	+	483	499	356	1236	427	362	694	493	564	440	647	597	1202	929	845	748	731
ENSMUSG00000057914	protein_coding	Cacnb2	overlapping_locus	chr2	14603088	14987908	384821	+	27	27	60	57	46	39	61	44	43	28	56	67	43	55	61	49	62
ENSMUSG00000026707	protein_coding	Nsun6	overlapping_locus	chr2	14995131	15055069	59939	-	187	221	214	258	178	186	171	187	219	167	187	163	218	176	171	182	177
ENSMUSG00000017418	protein_coding	Arl5b		chr2	15049395	15082456	33062	+	786	861	982	1031	962	855	949	722	798	798	824	815	941	768	922	841	758
ENSMUSG00000026748	protein_coding	Plxdc2		chr2	16356304	16755839	399536	+	1938	2153	3032	2541	2211	1869	2471	1908	2259	2173	2416	2167	2957	1958	3096	2225	2102
ENSMUSG00000053702	protein_coding	Nebl		chr2	17343909	17731464	387556	-	535	644	617	654	475	490	532	492	578	559	650	552	577	524	808	653	476
ENSMUSG00000054057	protein_coding	A930004D18Rik		chr2	18025193	18037737	12545	-	96	109	101	101	51	47	73	93	98	87	124	91	93	73	110	73	88
ENSMUSG00000054074	protein_coding	Skida1		chr2	18040676	18049051	8376	-	42	74	46	69	46	38	35	47	40	47	73	46	51	52	80	43	54
ENSMUSG00000026743	protein_coding	Mllt10	ncRNA_host	chr2	18055237	18212388	157152	+	636	731	817	920	667	568	701	660	714	686	701	695	917	687	787	732	674
ENSMUSG00000026740	protein_coding	Dnajc1	overlapping_locus	chr2	18195654	18392830	197177	-	550	698	824	760	586	552	668	604	616	632	611	597	732	595	728	656	634
ENSMUSG00000051154	protein_coding	Commd3		chr2	18672384	18676231	3848	+	1397	1110	1240	1533	1197	1221	1354	1176	1625	1222	1228	1096	1161	1383	1308	1334	1117
ENSMUSG00000026739	protein_coding	Bmi1		chr2	18677018	18686629	9612	+	712	754	740	985	648	659	800	741	828	710	766	708	769	751	731	765	626
ENSMUSG00000026737	protein_coding	Pip4k2a		chr2	18842255	18998126	155872	-	487	637	551	757	565	543	651	521	536	600	596	664	716	586	714	625	620
ENSMUSG00000023094	protein_coding	Msrb2		chr2	19371440	19394976	23537	+	53	60	54	84	64	41	71	69	90	79	95	66	82	81	75	92	78
ENSMUSG00000043415	protein_coding	Otud1		chr2	19657752	19660583	2832	+	856	989	1336	1075	999	882	1075	1099	1133	1128	1211	964	1444	925	1205	1025	935
ENSMUSG00000036617	protein_coding	Etl4	overlapping_locus	chr2	19909780	20810713	900934	+	1415	2193	2312	2587	1835	1716	2143	1843	1889	1753	1692	2217	2355	1595	1584	1938	1586
ENSMUSG00000036591	protein_coding	Arhgap21	overlapping_locus	chr2	20847919	20968881	120963	-	1242	1828	1787	2033	1613	1426	1662	1369	1318	1413	1353	1667	1863	1309	1573	1682	1446
ENSMUSG00000075514	lncRNA	Gm13375		chr2	20969054	20969997	944	+	83	110	60	106	86	85	102	126	117	92	73	111	102	96	107	89	87
ENSMUSG00000048550	protein_coding	Thnsl1		chr2	21205724	21215009	9286	+	82	84	97	123	79	83	65	94	114	103	101	68	86	95	95	89	89
ENSMUSG00000083863	unprocessed_pseudogene	Gm13341		chr2	22587291	22587962	672	-	118	87	97	109	108	108	105	94	132	83	104	75	78	90	93	90	47
ENSMUSG00000083563	unprocessed_pseudogene	Gm13340		chr2	22588103	22589647	1545	-	154	145	112	154	168	180	169	136	187	155	183	149	140	149	159	174	96
ENSMUSG00000026786	protein_coding	Apbb1ip		chr2	22774094	22875653	101560	+	172	253	248	301	158	123	211	166	180	164	206	187	283	209	194	161	188
ENSMUSG00000026784	protein_coding	Pdss1	ncRNA_host	chr2	22895522	22940266	44745	+	203	182	179	249	198	165	156	164	282	163	125	155	162	265	329	258	233
ENSMUSG00000058835	protein_coding	Abi1	overlapping_locus	chr2	22940073	23040241	100169	-	2579	2882	3275	3336	2676	2377	2767	2582	2663	2709	2748	2659	3057	2614	3002	2679	2404
ENSMUSG00000026781	protein_coding	Acbd5		chr2	23068167	23115558	47392	+	1127	1087	1550	1511	1095	1113	1255	1188	1321	1217	1216	1228	1502	1074	1467	1185	1096
ENSMUSG00000026779	protein_coding	Mastl		chr2	23115606	23156024	40419	-	211	205	208	246	166	176	135	137	161	104	126	132	139	144	161	90	111
ENSMUSG00000026775	protein_coding	Yme1l1		chr2	23156369	23199260	42892	+	2114	2139	2758	2499	2063	1964	2381	2158	2435	2122	2039	1987	2073	2260	2246	2315	2069
ENSMUSG00000026771	protein_coding	Spopl		chr2	23506220	23572106	65887	-	418	499	490	610	396	460	527	444	503	450	408	459	549	452	463	426	369
ENSMUSG00000026986	protein_coding	Hnmt		chr2	24002910	24049394	46485	-	142	169	127	191	129	153	160	184	206	196	238	184	203	178	195	170	159
ENSMUSG00000026985	protein_coding	Il1f8		chr2	24153161	24160519	7359	+	465	302	394	371	220	194	253	239	367	235	309	222	359	266	397	275	246
ENSMUSG00000044103	protein_coding	Il1f9		chr2	24186476	24193568	7093	+	560	400	654	485	310	290	346	307	462	388	510	402	695	460	692	477	484
ENSMUSG00000026984	protein_coding	Il1f6		chr2	24215418	24225702	10285	+	286	58	177	78	56	52	99	44	63	91	114	66	158	94	95	95	79
ENSMUSG00000026983	protein_coding	Il1f5		chr2	24276954	24283426	6473	+	2087	1531	2358	1819	1136	1067	1317	1130	1763	1533	1945	1396	2152	1384	2243	1702	1314
ENSMUSG00000046845	protein_coding	Il1f10		chr2	24291196	24293820	2625	+	168	128	196	214	157	170	169	155	263	173	267	167	247	193	287	217	169
ENSMUSG00000026981	protein_coding	Il1rn		chr2	24336853	24351494	14642	+	1398	1170	1881	1076	992	846	1033	865	857	1137	1227	983	1460	918	1264	990	856
ENSMUSG00000026979	protein_coding	Psd4		chr2	24367580	24414954	47375	+	984	1268	1578	1426	923	888	1099	982	995	978	981	983	1201	918	1122	1109	863
ENSMUSG00000036893	protein_coding	Ehmt1		chr2	24789928	24919614	129687	-	812	1046	1063	1301	1000	908	1032	930	923	842	891	924	1096	998	1004	1034	934
ENSMUSG00000026972	protein_coding	Arrdc1		chr2	24925352	24935252	9901	-	790	835	861	1069	698	717	831	749	884	844	710	905	888	936	906	834	788
ENSMUSG00000026974	protein_coding	Zmynd19		chr2	24949792	24962075	12284	+	412	472	597	490	536	437	512	475	465	410	407	407	482	451	435	454	372
ENSMUSG00000026975	protein_coding	Dph7		chr2	24962400	24972163	9764	+	255	287	292	279	314	250	307	279	326	255	230	281	252	328	310	288	250
ENSMUSG00000036850	protein_coding	Mrpl41		chr2	24974117	24975098	982	-	849	629	875	728	719	821	803	841	1056	791	825	674	624	920	819	884	729
ENSMUSG00000036833	protein_coding	Pnpla7	overlapping_locus	chr2	24976033	25054057	78025	+	582	704	629	780	683	598	710	667	656	572	605	662	659	655	634	636	634
ENSMUSG00000006476	protein_coding	Nsmf	ncRNA_host	chr2	25054355	25062881	8527	+	418	548	559	616	525	420	567	486	447	443	475	543	603	528	590	539	518
ENSMUSG00000078202	protein_coding	Nrarp		chr2	25180758	25183339	2582	+	329	368	596	335	272	290	384	379	351	397	276	369	406	246	353	306	283
ENSMUSG00000059555	protein_coding	Tor4a		chr2	25192966	25196886	3921	-	424	579	643	529	472	419	513	437	484	532	528	481	591	514	656	515	507
ENSMUSG00000013465	protein_coding	Nelfb		chr2	25199712	25211489	11778	-	1183	1382	1558	1431	1293	1300	1324	1291	1327	1183	1213	1180	1309	1212	1571	1385	1196
ENSMUSG00000036752	protein_coding	Tubb4b		chr2	25222160	25224702	2543	-	3661	4046	7556	4031	3792	3696	4406	3861	3610	3982	3654	3421	4835	3839	3929	4266	3391
ENSMUSG00000036731	protein_coding	Cysrt1		chr2	25238818	25242452	3635	-	872	656	975	791	638	595	722	541	821	696	866	520	944	718	1099	828	584
ENSMUSG00000044628	protein_coding	Rnf208		chr2	25242929	25244262	1334	+	419	500	710	584	504	487	528	409	392	469	475	418	619	368	560	431	363
ENSMUSG00000078201	protein_coding	Tmem203		chr2	25255439	25256292	854	+	97	113	113	117	135	132	147	120	97	107	99	88	112	109	143	119	108
ENSMUSG00000048707	protein_coding	Tprn		chr2	25262618	25269885	7268	+	421	499	551	501	530	492	531	432	454	452	411	427	554	362	518	451	424
ENSMUSG00000026966	protein_coding	Ssna1		chr2	25271039	25272438	1400	-	889	730	811	811	719	705	797	683	870	750	740	661	708	869	836	757	689
ENSMUSG00000026965	protein_coding	Anapc2		chr2	25272478	25285915	13438	+	1419	1954	2055	2140	1588	1537	1916	1703	1733	1609	1557	1686	2062	1716	1890	1791	1632
ENSMUSG00000036646	protein_coding	Man1b1	ncRNA_host	chr2	25332338	25352212	19875	+	1201	1536	1746	1599	1308	1240	1291	1340	1396	1350	1235	1282	1371	1331	1419	1450	1230
ENSMUSG00000026958	protein_coding	Dpp7		chr2	25352276	25356359	4084	-	175	201	256	267	189	182	241	194	268	169	180	198	255	264	287	239	188
ENSMUSG00000026956	protein_coding	Uap1l1		chr2	25359889	25365682	5794	-	364	497	487	564	418	393	521	551	501	536	574	565	608	507	518	518	522
ENSMUSG00000026955	protein_coding	Sapcd2		chr2	25372321	25378213	5893	+	105	102	127	143	94	115	95	99	110	78	96	95	107	102	111	66	62
ENSMUSG00000015085	protein_coding	Entpd2	overlapping_locus	chr2	25395874	25401321	5448	+	401	551	447	605	518	462	551	518	496	445	403	502	624	459	559	557	467
ENSMUSG00000015094	protein_coding	Npdc1	overlapping_locus	chr2	25399351	25409494	10144	+	641	788	719	771	669	665	830	773	768	699	635	729	882	805	924	773	736
ENSMUSG00000026944	protein_coding	Abca2	ncRNA_host	chr2	25428703	25448540	19838	+	824	1273	1490	1511	1000	965	1176	1010	960	956	972	1190	1401	994	1245	1217	1082
ENSMUSG00000047617	protein_coding	Paxx		chr2	25455141	25461094	5954	-	387	448	457	472	402	423	449	447	515	427	466	435	471	464	588	460	423
ENSMUSG00000015093	protein_coding	Clic3		chr2	25456838	25458776	1939	+	1328	1166	1633	1474	1124	1101	1380	1229	1513	1242	1446	1171	1593	1321	2012	1483	1196
ENSMUSG00000015090	protein_coding	Ptgds		chr2	25466709	25470046	3338	-	160	157	141	147	179	158	179	212	186	164	173	150	170	175	213	190	185
ENSMUSG00000015095	protein_coding	Fbxw5		chr2	25500750	25505471	4722	+	882	1203	1159	1376	1100	1103	1210	1067	1040	901	978	971	1124	949	1049	992	915
ENSMUSG00000026942	protein_coding	Traf2		chr2	25517982	25546940	28959	-	446	502	549	444	413	453	499	385	456	456	440	500	490	452	565	485	398
ENSMUSG00000015092	protein_coding	Edf1		chr2	25557847	25562082	4236	+	1402	1446	1900	1272	1320	1465	1553	1524	1668	1570	1355	1412	1340	1540	1659	1644	1378
ENSMUSG00000036504	protein_coding	Phpt1	overlapping_locus	chr2	25573430	25575224	1795	-	76	72	49	67	64	74	71	72	74	64	60	71	58	74	75	78	56
ENSMUSG00000015087	protein_coding	Rabl6		chr2	25583018	25608521	25504	-	1580	1813	2100	2055	1691	1632	1751	1667	1856	1571	1477	1499	1646	1675	1882	1989	1578
ENSMUSG00000026939	protein_coding	Tmem141		chr2	25620067	25622005	1939	-	173	144	173	157	134	148	159	171	212	185	224	177	146	204	233	218	155
ENSMUSG00000049086	protein_coding	Bmyc		chr2	25706739	25707721	983	+	62	70	68	89	54	61	67	84	65	42	68	61	48	73	91	69	89
ENSMUSG00000026933	protein_coding	Camsap1		chr2	25926838	25983282	56445	-	560	664	866	855	620	562	709	575	565	539	616	691	786	522	676	700	554
ENSMUSG00000036352	protein_coding	Ubac1		chr2	25998543	26021747	23205	-	695	756	790	864	766	718	774	731	832	778	698	688	756	726	732	860	681
ENSMUSG00000026932	protein_coding	Nacc2		chr2	26055535	26123220	67686	-	416	591	571	590	496	433	537	407	447	497	528	560	627	465	651	573	513
ENSMUSG00000087679	protein_coding	Tmem250-ps		chr2	26136814	26140521	3708	-	992	1280	1329	1258	1078	961	1022	1070	1034	895	994	1031	1166	943	1204	1105	905
ENSMUSG00000036327	protein_coding	Qsox2		chr2	26208637	26237525	28889	-	669	802	1042	878	791	692	806	690	764	757	768	713	801	711	825	728	661
ENSMUSG00000026930	protein_coding	Gpsm1		chr2	26315515	26348237	32723	+	312	458	337	604	332	312	400	301	378	331	455	380	694	381	559	422	415
ENSMUSG00000075467	protein_coding	Dnlz		chr2	26348121	26352110	3990	-	468	457	554	484	429	496	504	455	568	497	477	389	508	467	510	446	421
ENSMUSG00000026928	protein_coding	Card9		chr2	26352176	26360918	8743	-	224	226	225	334	207	194	307	195	211	173	252	282	270	248	263	175	200
ENSMUSG00000036281	protein_coding	Snapc4		chr2	26362765	26380653	17889	-	341	433	418	586	363	340	421	336	388	316	334	382	448	422	392	428	389
ENSMUSG00000026927	protein_coding	Entr1		chr2	26382802	26389316	6515	-	686	730	846	990	739	643	845	659	654	737	709	706	892	743	787	867	683
ENSMUSG00000026926	protein_coding	Pmpca		chr2	26389339	26397122	7784	+	1050	1355	1602	1284	1270	1222	1296	1158	1255	1168	1119	1200	1339	1191	1221	1249	1186
ENSMUSG00000026925	protein_coding	Inpp5e		chr2	26396249	26409203	12955	-	341	424	463	559	368	388	401	346	400	361	348	421	462	395	395	360	366
ENSMUSG00000026924	protein_coding	Sec16a		chr2	26409431	26445216	35786	-	1444	2184	2483	2178	1726	1487	1738	1426	1485	1499	1615	1641	2158	1387	1893	1779	1633
ENSMUSG00000026923	protein_coding	Notch1	ncRNA_host	chr2	26457903	26516663	58761	-	1976	3523	4401	3284	2333	2270	2815	2279	2197	2461	2411	3329	4133	2019	2468	2966	2564
ENSMUSG00000026921	protein_coding	Egfl7	overlapping_locus	chr2	26580014	26593120	13107	+	474	657	398	633	609	552	640	505	552	470	510	427	530	627	525	615	510
ENSMUSG00000026922	protein_coding	Agpat2		chr2	26593057	26604417	11361	-	712	739	580	997	700	692	648	699	716	589	763	569	860	589	840	640	677
ENSMUSG00000036160	protein_coding	Surf6		chr2	26888628	26902879	14252	-	390	557	573	464	472	488	539	464	469	444	437	464	489	413	474	448	432
ENSMUSG00000015776	protein_coding	Med22		chr2	26905262	26910677	5416	-	1956	2137	2189	2085	1956	1751	1966	1811	1892	2065	1899	1771	2036	1644	2023	1802	1773
ENSMUSG00000062647	protein_coding	Rpl7a	ncRNA_host	chr2	26910764	26913318	2555	+	647	607	774	672	603	684	764	557	835	660	593	546	556	748	761	684	638
ENSMUSG00000015790	protein_coding	Surf1		chr2	26913381	26916530	3150	-	696	765	806	852	740	745	812	803	855	804	795	801	819	877	867	826	722
ENSMUSG00000014873	protein_coding	Surf2		chr2	26916367	26920183	3817	+	419	371	500	491	359	347	416	409	443	397	331	374	403	351	401	412	320
ENSMUSG00000014867	protein_coding	Surf4		chr2	26920040	26933928	13889	-	3380	4014	5083	3865	4205	3743	4066	3803	3693	3486	3349	3257	3696	3455	3852	3708	3217
ENSMUSG00000052406	protein_coding	Rexo4		chr2	26953563	26964386	10824	-	554	571	721	625	493	425	522	454	558	523	524	506	638	557	608	631	527
ENSMUSG00000015488	protein_coding	Cacfd1		chr2	27009926	27021089	11164	+	803	988	951	1027	1080	905	927	868	952	782	853	803	923	845	953	893	734
ENSMUSG00000036067	protein_coding	Slc2a6		chr2	27021363	27027998	6636	-	36	79	76	54	34	46	53	30	50	36	33	61	47	32	50	48	41
ENSMUSG00000087364	protein_coding	Gm13398		chr2	27037285	27040853	3569	+	156	186	184	193	136	140	133	150	181	160	151	128	136	136	194	187	142
ENSMUSG00000009614	protein_coding	Sardh		chr2	27188393	27248337	59945	-	102	130	119	131	125	109	120	95	106	101	98	129	141	106	131	118	106
ENSMUSG00000009621	protein_coding	Vav2		chr2	27262104	27427033	164930	-	125	224	227	241	224	186	211	184	169	196	206	243	266	194	236	234	215
ENSMUSG00000109946	protein_coding	Brd3os		chr2	27442324	27444221	1898	+	40	54	54	47	55	46	52	56	50	46	37	46	48	44	61	56	48
ENSMUSG00000026918	protein_coding	Brd3	ncRNA_host	chr2	27445579	27507662	62084	-	1083	1516	1427	1667	1252	1104	1335	1212	1208	1283	1245	1383	1546	1124	1443	1362	1193
ENSMUSG00000026917	protein_coding	Wdr5		chr2	27515157	27536535	21379	+	888	1096	1191	1033	1041	952	1069	989	954	917	853	839	1039	918	1046	1001	874
ENSMUSG00000015846	protein_coding	Rxra		chr2	27676440	27762957	86518	+	5193	7714	8236	6635	6636	6097	6769	5911	5398	5946	5964	6460	7640	4779	7150	6265	5772
ENSMUSG00000026837	protein_coding	Col5a1		chr2	27886425	28039514	153090	+	869	1745	1685	1954	1412	818	1310	1155	1020	866	1131	1087	2146	1322	1954	1396	1567
ENSMUSG00000026833	protein_coding	Olfm1		chr2	28192992	28230736	37745	+	330	419	450	433	319	337	443	339	379	423	403	366	511	417	456	381	389
ENSMUSG00000035829	protein_coding	Ppp1r26		chr2	28446800	28455508	8709	+	38	57	56	47	50	42	44	48	54	61	62	66	66	62	111	61	60
ENSMUSG00000035772	protein_coding	Mrps2		chr2	28468066	28471178	3113	+	427	598	663	551	526	522	530	521	479	481	393	466	538	468	507	561	479
ENSMUSG00000082895	processed_pseudogene	Rpsa-ps9	pseudo_consens	chr2	28477166	28478050	885	+	73	83	125	108	89	68	85	77	135	61	75	40	80	70	82	59	50
ENSMUSG00000026821	protein_coding	Ralgds		chr2	28513125	28553081	39957	+	1501	2193	2178	2239	1958	1726	2067	1552	1523	1621	1667	1810	2489	1480	2058	1827	1690
ENSMUSG00000026816	protein_coding	Gtf3c5		chr2	28566311	28583751	17441	-	411	500	553	477	420	411	457	433	414	409	373	369	456	448	521	445	410
ENSMUSG00000026812	protein_coding	Tsc1		chr2	28641228	28691167	49940	+	522	759	653	999	673	581	762	635	683	542	580	668	789	575	623	594	556
ENSMUSG00000035666	protein_coding	Gtf3c4		chr2	28822299	28840360	18062	-	452	740	729	753	656	603	625	531	543	579	585	585	708	481	601	609	576
ENSMUSG00000026806	protein_coding	Ddx31		chr2	28840406	28905571	65166	+	175	184	233	192	190	185	193	151	150	180	198	162	184	195	169	206	182
ENSMUSG00000083773	processed_pseudogene	Gm13394	overlapping_locus	chr2	28933610	28934609	1000	-	784	1069	1158	1157	1026	1026	1057	1229	1114	890	693	890	1026	827	766	968	853
ENSMUSG00000026803	protein_coding	Ttf1		chr2	29060262	29087656	27395	+	227	303	347	342	215	212	325	243	329	223	253	291	339	279	307	261	224
ENSMUSG00000043535	protein_coding	Setx		chr2	29124181	29182471	58291	+	1165	1625	1768	1648	1328	1122	1345	1210	1156	1199	1202	1421	1608	1123	1323	1385	1181
ENSMUSG00000035513	protein_coding	Ntng2	overlapping_locus	chr2	29194541	29253005	58465	-	39	92	47	79	63	70	80	73	68	62	67	64	117	76	89	85	63
ENSMUSG00000079499	lncRNA	6530402F18Rik	overlapping_locus	chr2	29245107	29253006	7900	-	46	71	54	65	45	43	55	35	60	55	35	59	73	53	62	69	66
ENSMUSG00000026799	protein_coding	Med27	overlapping_locus	chr2	29346819	29524793	177975	+	232	287	274	241	240	232	246	256	221	222	181	179	238	229	261	224	207
ENSMUSG00000039844	protein_coding	Rapgef1		chr2	29619720	29740978	121259	+	1945	3159	2782	3184	2719	2467	2633	2259	2445	2285	2305	2418	2998	1834	2244	2472	2041
ENSMUSG00000039826	protein_coding	Trub2		chr2	29761224	29788502	27279	-	695	729	799	838	936	850	886	831	1025	810	796	758	793	882	853	820	762
ENSMUSG00000026798	protein_coding	Coq4		chr2	29787493	29797935	10443	+	277	247	332	274	293	271	271	261	310	238	242	234	252	344	338	315	295
ENSMUSG00000059316	protein_coding	Slc27a4		chr2	29802634	29817522	14889	+	17097	21779	22757	19332	25644	21684	23585	21656	24583	19945	19562	16906	18610	20575	21757	19232	20776
ENSMUSG00000069020	protein_coding	Urm1		chr2	29820075	29845002	24928	+	933	910	927	958	844	923	927	936	1030	904	908	773	794	889	934	848	751
ENSMUSG00000039787	protein_coding	Cercam		chr2	29869164	29882840	13677	+	227	241	188	397	217	196	249	208	243	190	211	233	277	280	291	205	237
ENSMUSG00000026790	protein_coding	Odf2		chr2	29889221	29931746	42526	+	930	1283	1229	1455	1143	1098	1178	937	978	897	763	982	1244	902	1131	941	877
ENSMUSG00000019715	protein_coding	Gle1		chr2	29935426	29960371	24946	+	747	888	949	1028	806	769	876	864	866	798	805	716	814	780	909	860	770
ENSMUSG00000057738	protein_coding	Sptan1	ncRNA_host	chr2	29965560	30031451	65892	+	4255	6752	7565	6433	5636	4754	5460	4722	4370	4752	4951	5747	6986	4518	5831	5483	5483
ENSMUSG00000039715	protein_coding	Wdr34		chr2	30031546	30048881	17336	-	361	348	367	381	383	351	381	371	344	304	299	298	307	342	368	311	288
ENSMUSG00000054766	protein_coding	Set		chr2	30057378	30072577	15200	+	841	962	1173	867	1025	964	1050	916	836	979	929	881	925	987	1042	1034	914
ENSMUSG00000026785	protein_coding	Pkn3		chr2	30077684	30091022	13339	+	205	287	268	316	198	198	282	226	236	266	227	295	339	294	293	275	268
ENSMUSG00000015335	protein_coding	Zdhhc12		chr2	30090944	30093648	2705	-	55	72	69	101	52	57	66	69	72	76	65	76	83	70	69	56	74
ENSMUSG00000039686	protein_coding	Zer1		chr2	30097283	30124585	27303	-	641	864	786	1026	675	640	696	688	701	701	752	792	960	684	797	788	733
ENSMUSG00000039678	protein_coding	Tbc1d13		chr2	30133746	30152013	18268	+	613	788	876	749	655	624	651	657	598	697	703	669	742	596	815	668	651
ENSMUSG00000015337	protein_coding	Endog		chr2	30171493	30174069	2577	+	108	100	114	91	98	130	118	109	101	117	105	83	118	98	111	129	77
ENSMUSG00000039660	protein_coding	Spout1		chr2	30173453	30178459	5007	-	319	330	444	388	339	365	353	340	390	305	314	301	318	346	373	376	324
ENSMUSG00000039648	protein_coding	Kyat1		chr2	30185124	30205847	20724	-	549	651	755	654	642	563	592	623	623	630	554	647	670	627	697	680	641
ENSMUSG00000007476	protein_coding	Lrrc8a	overlapping_locus	chr2	30237715	30263790	26076	+	241	274	257	288	275	239	238	212	234	263	281	296	340	207	274	259	199
ENSMUSG00000075419	protein_coding	Dolk		chr2	30284231	30286334	2104	-	600	660	716	603	644	689	654	664	654	696	618	587	617	628	709	583	586
[truncated: 12,317 more rows]

## Sheet: Log2_CPMs
gene_id	gene_type	gene_name	tag	seqnames	start	end	width	strand	a14_lpr_Rep1	a14_lpr_Rep2	a14_lpr_Rep3	a14_lpr_Rep4	a14_mrl_Rep1	a14_mrl_Rep2	a14_mrl_Rep3	a14_mrl_Rep4	a14_mrl_Rep5	a12_lpr_Rep1	a12_lpr_Rep2	a12_lpr_Rep3	a12_lpr_Rep4	a12_mrl_Rep1	a12_mrl_Rep2	a12_mrl_Rep3	a12_mrl_Rep4
[truncated: 13,303 more rows]

[truncated: 1 more sheets: Differential_Expression_Results]
